# Supplementary material for: Quantitative Trait Locus Analysis of Leaf Morphology Indicates Conserved Shape Loci in Grapevine
Source: Front Plant Sci. 2019 Nov 15;10:1373. doi: 10.3389/fpls.2019.01373 (PMC6873345; doi:10.3389/fpls.2019.01373)
Supplement: Supplementary file 7 [file Table_3.xlsx]

## Sheet: Sheet1
Supplementary Table 3. Procrustes-adjusted landmark coordinates for the two halves of each leaf
Leaf Number	ID	Family	Side	X1	Y1	X2	Y2	X13	Y13	X4	Y4	X6	Y6	X8	Y8	X10	Y10	X12	Y12	X15	Y15	X17	Y17
1	452001	V. rupestris B38 x 'Horizon'	right	299.441	-82.2495	-294.275	-611.493	152.292	-195.424	-323.201	-71.3534	-367.386	-6.88857	-201.675	260	-178.89	335.363	451.609	353.513	175.652	-5.36247	286.433	23.8959
2	452001	V. rupestris B38 x 'Horizon'	right	331.407	-70.1509	-403.529	-663.427	182.952	-207.274	-306.493	-113.276	-349.631	-57.6653	-86.4248	310.235	-78.6889	363.669	293.284	398.873	125.391	-3.30123	291.732	42.3182
3	452001	V. rupestris B38 x 'Horizon'	right	275.385	-60.6139	-295.023	-685.333	145.914	-173.074	-350.231	-135.873	-397.919	-77.4181	-57.0292	350.467	-42.9073	401.5	384.789	326.884	89.5071	8.77314	247.515	44.6872
4	452001	V. rupestris B38 x 'Horizon'	right	300.216	-53.4077	-377.795	-647.133	158.434	-192.211	-326	-146.991	-360.78	-106.589	-76.4961	349.17	-66.3914	388.016	348.582	376.789	136.285	-6.94973	263.947	39.3068
5	452001	V. rupestris B38 x 'Horizon'	right	264.146	-62.4496	-292.087	-690.336	141.957	-185.235	-359.64	-115.18	-399.543	-63.4483	-51.1605	356.615	-28.5328	393.944	333.685	366.177	140.414	-10.1898	250.762	10.1019
6	452001	V. rupestris B38 x 'Horizon'	right	296.439	-67.608	-353.636	-681.629	153.46	-198.138	-325.055	-101.953	-365.379	-57.4468	-73.6466	327.773	-61.3	374.868	318.347	411.804	138.925	-23.2001	271.846	15.5301
7	452002	V. rupestris B38 x 'Horizon'	right	350.377	-61.1466	-374.931	-511.895	123.078	-214.242	-325.914	-213.722	-427	-149.956	-71.7696	332.688	-73.5376	378.726	320.2	399.894	181.334	-18.8862	298.162	58.5392
8	452002	V. rupestris B38 x 'Horizon'	right	389.324	-48.8205	-424.942	-531.952	145.692	-222.136	-269.987	-165.242	-424.292	-122.938	-100.909	281.343	-99.2671	335.664	316.527	420.966	147.143	-8.04328	320.711	61.1576
9	452002	V. rupestris B38 x 'Horizon'	right	361.643	10.9754	-379.117	-678.15	147.185	-180.65	-340.874	-148.785	-416.551	-75.4772	-43.8322	311.618	-26.9976	381.516	287.164	279.84	168.897	6.90608	242.483	92.2061
10	452002	V. rupestris B38 x 'Horizon'	right	378.194	-42.1909	-427.995	-598.509	181.411	-195.714	-300.499	-116.913	-403.651	-71.0838	-94.0939	276.622	-114.669	333.525	262.133	388.369	189.199	-5.26992	329.971	31.1641
11	452002	V. rupestris B38 x 'Horizon'	right	328.96	-48.3497	-334.426	-646.148	136.094	-182.578	-360.402	-122.054	-437.889	-71.2525	-56.1957	299.594	-68.2496	346.584	344.513	384.898	162.788	-11.1102	284.807	50.417
12	452002	V. rupestris B38 x 'Horizon'	right	327.671	-61.9323	-329.479	-646.263	140.45	-181.837	-354.952	-113.82	-426.286	-66.3819	-79.9698	309.104	-81.6956	366.437	337.684	368.471	169.764	-9.94444	296.813	36.1675
13	452003	V. rupestris B38 x 'Horizon'	right	352.151	-21.2435	-383.644	-632.799	156.362	-170.189	-352.199	-127.653	-433.273	-77.3299	-74.5561	260.23	-58.3603	325.936	322.611	386.187	153.759	3.87829	317.149	52.9825
14	452003	V. rupestris B38 x 'Horizon'	right	374.08	-29.6018	-418.12	-577.348	153.874	-194.875	-328.905	-163.132	-401.187	-107.432	-91.2639	297.373	-86.0126	340.388	300.942	385.469	177.505	-1.30941	319.087	50.4679
15	452003	V. rupestris B38 x 'Horizon'	right	313.441	-77.9708	-344.944	-603.245	128.386	-205.715	-302.434	-156.225	-405.916	-111.302	-86.3304	355.979	-75.2217	409.551	340.338	394.59	146.572	-25.0147	286.11	19.3514
16	452003	V. rupestris B38 x 'Horizon'	right	392.783	-77.6152	-442.411	-518.111	151.232	-205.867	-296.651	-150.107	-375.462	-132.714	-90.0346	287.786	-123.583	328.719	271.26	432.193	183.039	-13.8907	329.828	49.6074
17	452003	V. rupestris B38 x 'Horizon'	right	351.204	-66.8715	-364.439	-538.152	140.053	-187.574	-352.834	-175.99	-417.324	-116.391	-95.2976	302.786	-92.351	352.702	339.153	418.859	166.514	-22.1686	325.323	32.8003
18	452003	V. rupestris B38 x 'Horizon'	right	345.86	-45.3566	-394.337	-565.29	147.545	-179.075	-341.369	-147.186	-415.844	-98.2807	-89.8845	261.513	-96.199	312.425	330.649	444.043	177.021	1.0383	336.558	16.169
19	452004	V. rupestris B38 x 'Horizon'	right	308.591	-84.108	-337.604	-568.952	150.696	-219.663	-359.799	-164.393	-389.757	-114.474	-77.5873	345.482	-63.6657	396.82	321.867	423.041	171.804	-36.8137	275.456	23.0603
20	452004	V. rupestris B38 x 'Horizon'	right	294.444	-63.7715	-331.746	-617.386	141.116	-194.836	-357.112	-163.517	-403.899	-128.262	-50.3041	356.428	-38.0445	407.126	345.909	370.968	142.174	-20.8958	257.463	54.1466
21	452004	V. rupestris B38 x 'Horizon'	right	313.115	-82.0477	-305.132	-571.809	136.681	-209.064	-372.097	-150.258	-449.552	-99.7734	-62.6925	334.279	-60.9915	372.895	321.149	410.483	198.017	-36.4494	281.503	31.7449
22	452004	V. rupestris B38 x 'Horizon'	right	306.638	-63.9935	-323.223	-620.587	158.891	-195.78	-367.529	-143.717	-414.045	-93.9466	-65.483	340.385	-52.9865	386.958	338.398	389.462	151.386	-26.4803	267.952	27.6988
23	452004	V. rupestris B38 x 'Horizon'	right	328.186	-89.4194	-285.77	-534.362	117.861	-243.091	-372.276	-154.135	-407.116	-105.427	-102.135	342.292	-92.4995	392.515	357.062	409.651	171.304	-42.7929	285.383	24.7703
24	452004	V. rupestris B38 x 'Horizon'	right	313.67	-83.1311	-349.527	-561.201	156.127	-200.168	-330.625	-177.316	-404.948	-123.6	-82.3445	347.203	-72.1901	394.901	341.943	424.405	154.543	-34.2967	273.35	13.2057
25	452005	V. rupestris B38 x 'Horizon'	right	322.084	-32.392	-365.55	-689.642	168.21	-153.891	-315.254	-114.387	-454.587	-26.8429	-74.6372	240.512	-37.4308	331.935	332.161	387.017	146.281	16.5593	278.724	41.132
26	452005	V. rupestris B38 x 'Horizon'	right	354.335	-44.5488	-358.948	-547.411	108.552	-202.247	-333.457	-178.129	-445.344	-120.918	-66.9324	303.991	-78.5962	343.785	343.41	430.657	171.357	-16.1021	305.622	30.9225
27	452005	V. rupestris B38 x 'Horizon'	right	410.082	-68.8524	-396.196	-489.75	186.333	-224.923	-323.991	-133.736	-426.152	-53.1417	-95.26	237.845	-125.375	309.159	206.021	441.093	204.583	-31.2187	359.956	13.5251
28	452005	V. rupestris B38 x 'Horizon'	right	346.807	-14.6633	-462.771	-652.068	163.648	-184.918	-281.453	-140.231	-382.055	-67.1258	-42.3128	276.298	-76.0971	317.245	259.235	403.566	184.055	1.12071	290.944	60.7753
29	452005	V. rupestris B38 x 'Horizon'	right	352.522	-53.059	-353.648	-634.415	169.861	-182.064	-333.955	-125.754	-437.647	-33.3777	-77.5328	279.139	-113.524	335.649	339.879	383.294	151.785	-5.80028	302.26	36.3875
30	452005	V. rupestris B38 x 'Horizon'	right	306.208	-78.7767	-257.968	-589.054	131.668	-208.787	-351.631	-154.077	-447.029	-72.0271	-88.0994	351.384	-83.5056	417.72	356.005	365.31	148.718	-4.87864	285.635	-26.8121
31	452006	V. rupestris B38 x 'Horizon'	right	350.737	-60.4162	-368.81	-619.694	170.492	-212.097	-352.031	-128.52	-392.346	-95.5236	-84.7823	325.958	-63.3915	379.512	303.564	370.898	155.048	-16.1944	281.519	56.0766
32	452006	V. rupestris B38 x 'Horizon'	right	303.731	-62.628	-279.433	-609.38	127.178	-190.84	-389.832	-162.633	-430.966	-107.379	-60.6347	352.523	-38.109	404.043	362.955	347.787	150.967	-12.0901	254.146	40.5962
33	452006	V. rupestris B38 x 'Horizon'	right	355.328	-65.0893	-392.835	-626.366	180.42	-224.271	-335.779	-125.567	-375.346	-70.3804	-68.4596	310.769	-71.487	351.836	281.003	410.891	141.657	-20.3089	285.498	58.4881
34	452006	V. rupestris B38 x 'Horizon'	right	345.342	-93.7118	-305.337	-546.552	134.658	-230.58	-371.558	-139.654	-423.663	-104.232	-98.4588	334.59	-85.5304	371.737	338.565	407.22	188.818	-38.8425	277.164	40.0249
35	452006	V. rupestris B38 x 'Horizon'	right	278.393	-70.6933	-285.435	-588.896	116.797	-220.479	-375.24	-175.831	-435.351	-116.382	-47.3247	361.102	-31.0388	403.59	342.732	376.268	168.762	-19.1492	267.703	50.4698
36	452006	V. rupestris B38 x 'Horizon'	right	328.448	-79.0571	-286.511	-604.349	150.415	-191.85	-395.339	-153.062	-438.699	-87.9763	-52.1543	343.92	-41.4803	390.428	320.319	367.949	136.905	-20.3336	278.097	34.3313
37	452007	V. rupestris B38 x 'Horizon'	right	331.94	-68.859	-360.06	-635.865	191.837	-199.557	-343.725	-120.665	-405.037	-53.4507	-79.0683	324.54	-65.2446	367.091	272.188	395.285	165.229	-20.0383	291.941	11.5194
38	452007	V. rupestris B38 x 'Horizon'	right	350.789	-55.7911	-346.091	-585.971	143.187	-198.567	-357.095	-158.964	-422.605	-96.1585	-82.2822	316.188	-79.5399	376.42	331.428	387.086	159.434	-17.7013	302.775	33.4588
39	452007	V. rupestris B38 x 'Horizon'	right	340.962	-93.2243	-361.465	-556.244	210.228	-186.863	-350.699	-173.95	-405.502	-84.6362	-92.7011	337.371	-93.5661	374.478	303.396	403.409	161.463	-38.0046	287.884	17.6636
40	452007	V. rupestris B38 x 'Horizon'	right	358.617	-61.9294	-374.627	-544.17	159.893	-207.061	-331.885	-196.436	-430.281	-83.7601	-84.2155	302.369	-89.3686	345	325.45	427.15	163.829	-24.9205	302.589	43.7568
41	452007	V. rupestris B38 x 'Horizon'	right	377.338	-72.8744	-321.006	-524.769	154.351	-198.356	-377.382	-176.239	-451.164	-80.0474	-92.5882	312.73	-89.3397	356.921	301.296	397.235	180.814	-27.7269	317.681	13.1262
42	452007	V. rupestris B38 x 'Horizon'	right	364.083	-87.6984	-375.622	-549.974	198.427	-202.613	-316.379	-151.278	-442.848	-62.9729	-100.091	308.858	-93.9325	342.437	259.026	420.125	185.448	-29.3219	321.889	12.4376
43	452008	V. rupestris B38 x 'Horizon'	right	372.643	-76.4424	-415.613	-523.229	178.657	-201.751	-329.635	-154.644	-394.92	-104.047	-91.0692	276.721	-111.841	332.642	273.709	444.205	194.422	-23.614	323.648	30.1583
44	452008	V. rupestris B38 x 'Horizon'	right	377.669	-32.6074	-336.817	-601.801	138.294	-200.558	-358.425	-135.458	-448.387	-71.2276	-99.6739	306.168	-93.6878	361.626	316.167	311.182	178.548	6.04686	326.313	56.6295
45	452008	V. rupestris B38 x 'Horizon'	right	391.852	-58.0304	-458.964	-514.768	167.819	-205.92	-308.851	-147.209	-362.86	-122.004	-99.887	263.705	-109.119	306.494	260.149	445.416	186.961	-21.6315	332.9	53.9485
46	452008	V. rupestris B38 x 'Horizon'	right	353.539	-65.1596	-377.063	-596.133	150.578	-195.485	-339.148	-139.242	-393.455	-93.6399	-90.197	325.482	-92.6632	356.673	306.633	405.949	180.464	-13.6571	301.312	15.2124
47	452008	V. rupestris B38 x 'Horizon'	right	358.717	-51.3743	-420.64	-608.783	164.032	-191.751	-319.281	-140.911	-379.564	-74.5559	-87.9749	271.097	-89.5426	323.246	316.935	434.753	158.601	-16.5553	298.718	54.8366
48	452008	V. rupestris B38 x 'Horizon'	right	352.277	-39.6418	-375.144	-591.993	149.27	-194.166	-346.538	-146.52	-403.354	-106.669	-97.0889	305.795	-97.9622	356.81	355.363	376.307	156.286	-7.78591	306.893	47.8636
49	452009	V. rupestris B38 x 'Horizon'	right	362.155	-81.2645	-369.334	-558.483	164.615	-197.73	-338.803	-125.64	-423.1	-76.3524	-97.1746	284.092	-114.995	323.047	305.235	436.983	177.237	-27.7154	334.164	23.0637
50	452009	V. rupestris B38 x 'Horizon'	right	314.463	-80.7421	-322.39	-617.102	148.978	-188.048	-352.829	-142.808	-417.271	-73.5165	-70.5143	327.867	-74.0156	391.086	325.663	405.561	163.553	-34.7096	284.364	12.4123
51	452009	V. rupestris B38 x 'Horizon'	right	366.157	-79.0554	-393.613	-542.948	183.116	-221.543	-318.027	-155.929	-405.774	-94.2876	-76.2422	303.11	-96.102	363.223	269.154	444.242	170.917	-39.2384	300.415	22.4254
52	452009	V. rupestris B38 x 'Horizon'	right	356.339	-66.3309	-342.755	-540.417	151.497	-191.956	-350.282	-184.445	-445.846	-98.4809	-93.4033	313.703	-86.3622	362.139	344.49	404.872	178.059	-36.373	288.264	37.2881
53	452009	V. rupestris B38 x 'Horizon'	right	377.81	-69.6497	-421.895	-407.829	151.089	-201.932	-319.37	-209.21	-379.424	-201.037	-77.5065	291.693	-120.08	344.577	308.371	447.058	177.589	-33.687	303.416	40.016
54	452009	V. rupestris B38 x 'Horizon'	right	320.569	-85.0082	-275.611	-470.208	110.719	-198.091	-333.573	-251.212	-471.274	-135.039	-62.5765	349.837	-46.3392	400.931	364.867	430.027	135.886	-39.4468	257.332	-1.78996
55	452010	V. rupestris B38 x 'Horizon'	right	381.64	-10.9179	-453.858	-525.309	172.71	-194.925	-317.12	-175.937	-419.03	-101.923	-68.0374	245.47	-90.3412	293.209	256.492	428.948	201.276	-7.10138	336.269	48.4869
56	452010	V. rupestris B38 x 'Horizon'	right	340.851	-62.842	-320.274	-551.147	114.294	-190.748	-350.816	-157.455	-465.847	-147.43	-53.27	308.574	-65.0928	385.224	353.369	403.893	155.23	-17.8287	291.556	29.7591
57	452010	V. rupestris B38 x 'Horizon'	right	406.32	-60.6008	-422.72	-523.563	191.693	-214.485	-296.667	-131.303	-431.6	-64.776	-78.8555	262.733	-123.086	285.457	231.12	441.706	186.498	-28.7281	337.296	33.5605
58	452010	V. rupestris B38 x 'Horizon'	right	306.027	-60.1687	-309.839	-602.551	115.74	-189.765	-346.794	-160.498	-452.281	-121.474	-56.3918	337.454	-47.5512	390.978	363.353	382.021	151.47	-9.11205	276.268	33.1144
59	452010	V. rupestris B38 x 'Horizon'	right	322.133	-43.2633	-335.88	-609.397	163.592	-176.562	-343.652	-132.689	-462.847	-94.3773	-75.2848	299.134	-76.8243	362.272	364.155	381.884	151.208	-16.2286	293.4	29.2272
60	452010	V. rupestris B38 x 'Horizon'	right	363.285	-30.7816	-459.812	-534.698	195.625	-180.979	-296.613	-171.962	-396.133	-138.89	-88.2857	270.99	-109.682	338.782	316.385	409.518	180.382	-9.86219	294.848	47.8829
61	452012	V. rupestris B38 x 'Horizon'	right	298.711	-41.063	-303.846	-617.955	110.398	-230.886	-361.913	-179.249	-410.758	-113.477	-33.5605	351.808	-23.0535	412.739	357.951	360.097	122.697	-22.9184	243.373	80.9051
62	452012	V. rupestris B38 x 'Horizon'	right	304.49	-58.3933	-290.526	-619.846	110.905	-198.784	-363.34	-151.254	-447.863	-85.1547	-40.0464	320.768	-44.0509	352.646	378.318	420.65	125.934	-13.0735	266.179	32.4414
63	452012	V. rupestris B38 x 'Horizon'	right	339.959	-52.2558	-341.079	-653.164	122.261	-219.687	-346.406	-127.751	-390.301	-45.7516	-82.9978	304.003	-70.6363	354.496	340.064	399.623	142.055	-10.7727	287.081	51.2605
64	452012	V. rupestris B38 x 'Horizon'	right	368.577	-101.494	-286.323	-554.66	162.147	-260.898	-361.623	-111.755	-421.96	-42.4463	-112.365	302.611	-91.9356	359.383	313.864	438.12	133.439	-35.7216	296.179	6.86003
65	452012	V. rupestris B38 x 'Horizon'	right	338.088	-102.811	-238.689	-547.226	123.636	-239.607	-368.891	-144.805	-439.394	-58.6659	-98.7717	336.306	-90.046	393.24	349.747	410.185	131.433	-39.5888	292.887	-7.02777
66	452012	V. rupestris B38 x 'Horizon'	right	350.1	-23.4665	-394.267	-587.746	174.793	-202.457	-343.254	-146.603	-398.409	-90.6312	-93.6455	289.309	-95.9844	347.407	335.624	401.815	162.494	-28.3739	302.548	40.7471
67	452013	V. rupestris B38 x 'Horizon'	right	331.824	-42.6775	-329.859	-626.936	134.121	-193.499	-361.654	-144.004	-449.002	-71.348	-60.1262	301.408	-43.8529	358.48	325.281	399.546	173.236	-14.2122	280.032	33.2433
68	452013	V. rupestris B38 x 'Horizon'	right	305.16	-57.1615	-308.976	-659.419	161.802	-171.798	-359.882	-122.722	-421.116	-68.7846	-73.046	310.549	-67.6457	384.423	384.081	358.488	124.066	-11.4115	255.556	37.8364
69	452013	V. rupestris B38 x 'Horizon'	right	323.613	-52.7897	-387.372	-562.387	183.251	-172.803	-303.302	-95.5237	-358.044	-56.5734	-189.687	221.805	-208.618	300.646	447.744	361.798	202.842	1.94124	289.573	53.8866
70	452013	V. rupestris B38 x 'Horizon'	right	300.732	-70.5688	-319.831	-650.92	151.465	-184.228	-331.009	-131.527	-449.76	-87.4751	-37.0428	330.316	-33.1675	420.666	288.001	365.326	146.616	-6.89689	283.995	15.307
71	452013	V. rupestris B38 x 'Horizon'	right	277.715	-48.7461	-353.738	-597.407	151.651	-156.578	-325.591	-179.209	-429.532	-162.008	-60.4259	348.053	-52.108	397.648	386.617	359.83	142.392	8.32765	263.019	30.0884
72	452013	V. rupestris B38 x 'Horizon'	right	288.709	-55.8641	-314.621	-690.548	151.343	-171.082	-340.647	-109.364	-404.454	-42.8398	-70.9789	307.504	-68.4852	383.223	369.116	376.339	135.223	-17.3727	254.795	20.0038
73	452014	V. rupestris B38 x 'Horizon'	right	245.444	-67.0811	-252.607	-669.416	143.045	-195.538	-329.382	-139.988	-423.513	-57.6824	-52.5245	352.171	-40.1617	427.443	391.495	360.238	97.5957	-14.7068	220.61	4.56041
74	452014	V. rupestris B38 x 'Horizon'	right	312.238	-70.8528	-283.987	-623.173	135.821	-200.882	-357.327	-135.16	-441.016	-77.2085	-68.851	330.924	-77.8581	387.58	377.955	370.791	129.404	-7.73983	273.62	25.7223
75	452014	V. rupestris B38 x 'Horizon'	right	323.426	-72.701	-329.11	-552.473	139.473	-219.984	-348.103	-173.015	-424.758	-110.43	-89.6884	313.841	-82.9356	376.771	375.268	418.296	146.307	-22.4312	290.12	42.1272
76	452014	V. rupestris B38 x 'Horizon'	right	312.698	-69.1315	-348.365	-585.134	134.009	-211.208	-317.908	-169.474	-413.755	-111.009	-91.8501	320.431	-75.1947	370.219	391.124	419.91	131.672	-8.14828	277.571	43.5454
77	452014	V. rupestris B38 x 'Horizon'	right	319.476	-91.8873	-319	-598.501	143.981	-228.102	-328.41	-119.338	-418.941	-83.177	-91.5175	328.273	-87.2631	388.624	335.18	418.403	157.847	-29.1977	288.649	14.9039
78	452014	V. rupestris B38 x 'Horizon'	right	252.484	-46.2688	-256.947	-627.456	102.362	-181.609	-366.626	-189.611	-462.288	-134.052	75.0195	370.815	101.964	401.782	255.787	368.324	91.4641	-10.3004	206.78	48.3777
79	452015	V. rupestris B38 x 'Horizon'	right	350.075	-33.7718	-425.406	-633.923	189.822	-193.362	-321.537	-139.474	-389.392	-72.8129	-63.9397	290.112	-79.643	337.415	292.171	391.581	159.067	-10.7113	288.782	64.9468
80	452015	V. rupestris B38 x 'Horizon'	right	348.785	-55.644	-364.041	-613.295	145.814	-197.92	-339.486	-130.157	-429.633	-103.263	-68.2579	314.428	-68.6913	344.728	329.104	402.538	159.524	4.19293	286.883	34.3912
81	452015	V. rupestris B38 x 'Horizon'	right	376.317	-68.4013	-421.289	-502.112	163.631	-210.469	-310.565	-184.972	-393.638	-151.129	-88.8668	310.773	-83.1586	356.738	291.094	433.964	170.822	-33.3948	295.653	49.0038
82	452015	V. rupestris B38 x 'Horizon'	right	386.208	-44.6474	-430.946	-625.76	191.992	-187.991	-333.793	-129.236	-386.637	-95.0355	-61.7701	296.744	-66.3999	322.529	271.901	368.208	135.631	16.8212	293.814	78.3683
83	452015	V. rupestris B38 x 'Horizon'	right	367.977	-82.04	-367.134	-633.697	193.271	-202.471	-319.74	-61.8452	-379.948	30.7362	-125.489	244.372	-147.947	294.272	281.748	415.177	186.268	-19.8678	310.992	15.3635
84	452015	V. rupestris B38 x 'Horizon'	right	360.12	-69.3382	-324.222	-632.138	165.274	-187.56	-345.468	-119.204	-412.697	-76.4104	-80.934	329.268	-92.855	377.605	353.864	360.93	99.7814	1.39821	277.137	15.4505
85	452016	V. rupestris B38 x 'Horizon'	right	340.043	-80.0685	-354.225	-579.479	87.8776	-208.361	-347.89	-128.809	-351.803	-102.396	-99.4028	307.48	-130.629	369.713	345.701	400.4	163.734	-47.6305	346.594	69.1513
86	452016	V. rupestris B38 x 'Horizon'	right	371.971	-58.3093	-372.646	-590.715	143	-197.107	-330.371	-117.221	-404.609	-54.9857	-98.2091	282.763	-109.724	330.787	289.288	434.788	175.713	-29.3933	335.587	-0.607162
87	452016	V. rupestris B38 x 'Horizon'	right	334.609	-35.5849	-367.647	-604.534	129.336	-199.783	-290.331	-162.989	-458.377	-125.375	-63.7258	332.567	-71.6399	412.372	316.918	322.919	176.043	1.31361	294.814	59.0933
88	452016	V. rupestris B38 x 'Horizon'	right	318.984	-52.9457	-332.61	-547.452	105.398	-211.643	-328.608	-134.468	-426.676	-154.872	-87.0826	314.149	-100.114	374.67	392.935	418.504	155.662	-26.0666	302.112	20.125
89	452016	V. rupestris B38 x 'Horizon'	right	345.321	-24.3758	-388.469	-584.251	138.347	-219.619	-338.897	-151.226	-410.138	-112.815	-76.7705	299.026	-73.9516	355.602	317.046	408.734	182.823	-4.90012	304.689	33.8239
90	452016	V. rupestris B38 x 'Horizon'	right	325.695	-37.9543	-346.792	-579.902	150.755	-203.267	-340.658	-167.124	-459.493	-84.9404	-75.6441	306.703	-68.0136	358.242	325.72	408.327	181.698	-14.8104	306.734	14.724
91	452017	V. rupestris B38 x 'Horizon'	right	364.704	-79.919	-315.269	-544.597	149.607	-249.446	-349.618	-171.503	-452.983	-94.0126	-69.7283	325.154	-61.575	387.138	301.885	401.271	137.977	-9.08116	295	34.9956
92	452017	V. rupestris B38 x 'Horizon'	right	360.604	-67.1698	-314.95	-606.648	148.93	-225.814	-363.047	-108.228	-417.252	-48.3046	-84.8117	306.889	-95.8337	351.159	316.504	411.314	140.716	-20.8031	309.141	7.60561
93	452017	V. rupestris B38 x 'Horizon'	right	326.45	-82.4292	-310.752	-616.087	140.807	-236.371	-342.687	-123.989	-420.237	-49.6835	-59.8065	310.557	-67.1856	382.466	299.731	438.997	140.376	-33.8142	293.304	10.3548
94	452017	V. rupestris B38 x 'Horizon'	right	306.857	-61.9524	-273.418	-607.888	110.281	-218.899	-364.181	-139.11	-437.857	-96.7925	-52.44	312.873	-51.0202	364.644	405.149	415.457	88.7593	3.8981	267.87	27.7693
95	452017	V. rupestris B38 x 'Horizon'	right	308.064	-118.194	-250.262	-580.551	130.336	-223.977	-363.918	-144.456	-442.146	-84.1134	-67.8053	338.105	-59.5916	403.18	357.095	409.781	113.475	-14.3933	274.752	14.6184
96	452017	V. rupestris B38 x 'Horizon'	right	315.482	-61.1435	-325.614	-573.593	124.873	-250.85	-345.637	-150.361	-410.564	-121.435	-68.1071	335.411	-59.9902	397.082	337.879	420.244	150.191	-26.6009	281.486	31.2465
97	452018	V. rupestris B38 x 'Horizon'	right	364.938	-47.9852	-428.432	-625.833	155.139	-199.7	-291.991	-131.634	-418.392	-87.0573	-53.2325	272.531	-64.3661	325.898	277.671	417.852	158.31	9.98836	300.356	65.9415
98	452018	V. rupestris B38 x 'Horizon'	right	341.104	-66.9255	-398.739	-478.922	121.741	-186.891	-311.739	-191.031	-415.166	-206.547	-82.5174	295.294	-85.2506	360.647	358.39	429.56	158.601	2.10057	313.577	42.7146
99	452018	V. rupestris B38 x 'Horizon'	right	394.326	-70.9108	-426.571	-419.13	155.444	-217.303	-213.742	-158.699	-458.104	-162.355	-102.321	271.592	-149.061	339.169	270.629	434.004	191.616	-28.5319	337.785	12.1644
100	452018	V. rupestris B38 x 'Horizon'	right	397.238	-57.6812	-434.762	-569.064	154.284	-231.763	-269.147	-163.211	-394.206	-34.8225	-92.3425	275.263	-106.18	327.47	225.769	421.05	192.319	-31.0799	327.027	63.8375
101	452018	V. rupestris B38 x 'Horizon'	right	405.946	-29.368	-424.429	-539.626	153.694	-220.54	-321.904	-145.35	-412.634	-83.3865	-91.8739	251.958	-106.359	285.939	283.964	427.997	179.871	-6.76976	333.724	59.1467
102	452018	V. rupestris B38 x 'Horizon'	right	358.404	-38.3379	-391.986	-556.584	130.449	-182.466	-300.298	-171.745	-480.392	-127.186	-58.0791	255.827	-62.5239	318.673	351.998	432.518	153.659	8.79139	298.768	60.5095
103	452019	V. rupestris B38 x 'Horizon'	right	312.611	-61.5425	-302.021	-614.027	114.612	-215.284	-325.842	-149.077	-442.309	-60.8314	-86.8786	312.786	-85.0607	371.766	386.215	402.075	135.184	-17.6446	293.488	31.7786
104	452019	V. rupestris B38 x 'Horizon'	right	312.822	-65.3061	-313.056	-634.237	101.395	-223.551	-334.4	-143.897	-419.222	-76.7473	-69.7394	325.563	-52.2492	378.189	358.941	409.356	142.575	-9.47388	272.933	40.1048
105	452019	V. rupestris B38 x 'Horizon'	right	293.512	-59.6649	-312.36	-650.608	129.148	-209.278	-328.525	-157.964	-422.072	-78.9094	-56.0645	346.52	-44.1162	400.249	361.432	371.059	120.362	-11.5063	258.683	50.1027
106	452019	V. rupestris B38 x 'Horizon'	right	309.745	-50.086	-274.866	-545.77	83.0484	-216.408	-357.782	-191.868	-452.342	-141.785	-49.6077	329.078	-62.8877	389.447	419.814	381.712	110.579	-7.8254	274.298	53.5059
107	452019	V. rupestris B38 x 'Horizon'	right	322.059	-56.9009	-332.344	-577.697	133.191	-222.896	-337.257	-171.662	-423.752	-77.7795	-94.9675	314.589	-102.873	376.066	372.554	395.51	168.374	-25.5893	295.017	46.3602
108	452019	V. rupestris B38 x 'Horizon'	right	326.903	-48.0322	-294.562	-643.577	114.267	-224.965	-343.364	-134.604	-428.381	-68.4439	-63.4295	324.991	-56.144	397.719	355.77	371.953	112.152	-6.11885	276.789	31.0784
109	452020	V. rupestris B38 x 'Horizon'	right	339.743	-55.8309	-337.388	-619.162	157.815	-186.878	-347.528	-152.981	-425.097	-70.3019	-84.1086	323.926	-74.0814	378.139	335.508	375.968	138.453	-16.848	296.683	23.9694
110	452020	V. rupestris B38 x 'Horizon'	right	384.239	-24.284	-427.745	-577.715	157.431	-195.32	-313.894	-149.646	-397.821	-96.9562	-96.3223	285.753	-103.667	334.165	296.05	390.737	177.724	-10.4244	324.005	43.6922
111	452020	V. rupestris B38 x 'Horizon'	right	377.866	-40.6893	-381.752	-563.693	155.335	-212.016	-326.379	-160.155	-440.23	-84.4911	-82.0269	290.983	-86.5384	336.996	303.733	414.957	160.284	-17.2091	319.708	35.3164
112	452020	V. rupestris B38 x 'Horizon'	right	393.155	-35.9764	-395.211	-578.657	149.324	-217.075	-330.478	-151.237	-415.15	-83.2143	-77.6103	301.241	-77.5266	342.151	268.326	400.312	164.685	-24.5333	320.486	46.9887
113	452020	V. rupestris B38 x 'Horizon'	right	408.25	-13.6562	-436.127	-549.308	144.198	-223.528	-329.193	-135.629	-372.443	-97.8464	-100.367	258.743	-98.0825	304.888	277.929	425.042	178.747	-23.5248	327.088	54.8203
114	452020	V. rupestris B38 x 'Horizon'	right	361.689	-39.871	-423.403	-630.737	179.869	-195.202	-335.565	-136.15	-370.466	-64.3594	-74.327	286.407	-74.1675	336.318	275.333	404.45	178.72	-16.203	282.317	55.3472
115	452021	V. rupestris B38 x 'Horizon'	right	327.548	-76.9641	-354.234	-568.761	127.647	-199.494	-297.347	-150.497	-403.451	-111.113	-112.894	305.482	-123.225	389.25	386.23	411.32	137.035	-16.7002	312.692	17.4776
116	452021	V. rupestris B38 x 'Horizon'	right	340.947	-47.1762	-411.759	-517.133	163.466	-205.928	-310.583	-172.962	-426.625	-173.983	-69.113	296.539	-87.2189	365.591	333.477	413.649	171.264	-17.6226	296.145	59.0251
117	452021	V. rupestris B38 x 'Horizon'	right	358.981	-62.0224	-400.861	-530.35	157.759	-198.463	-325.422	-159.321	-412.816	-130.188	-85.1526	283.185	-95.9949	332.56	317.617	447.685	155.341	3.22313	330.549	13.6917
118	452021	V. rupestris B38 x 'Horizon'	right	371.223	-54.5945	-383.902	-542.497	127.166	-191.125	-314.502	-188.344	-451.7	-93.3115	-85.3487	282.514	-90.4858	341.348	312.521	415.754	187.738	-21.3657	327.291	51.6218
119	452021	V. rupestris B38 x 'Horizon'	right	379.882	-47.7659	-428.634	-506.45	165.335	-199.336	-315.348	-157.071	-391.239	-129.329	-114.943	275.649	-127.894	322.235	318.354	425.85	192.677	-20.7355	321.812	36.9522
120	452021	V. rupestris B38 x 'Horizon'	right	288.762	-37.3088	-353.247	-617.713	151.536	-162.129	-339.568	-160.783	-435.93	-146.302	-54.5458	320.514	-56.2835	380.644	397.513	347.39	136.158	11.556	265.606	64.132
121	452022	V. rupestris B38 x 'Horizon'	right	319.568	-82.0094	-260.749	-608.595	133.896	-215.333	-375.782	-141.846	-440.206	-72.936	-72.067	355.179	-51.6241	391.003	347.475	374.042	129.213	-16.1255	270.278	16.622
122	452022	V. rupestris B38 x 'Horizon'	right	307.443	-86.6451	-283.345	-582.41	135.685	-228.983	-348.814	-163.843	-402.508	-103.374	-82.3532	385.761	-80.3816	430.347	349.596	354.964	130.498	-21.1093	274.18	15.2927
123	452022	V. rupestris B38 x 'Horizon'	right	325.299	-71.177	-307.61	-603.691	151.704	-220.453	-364.093	-123.606	-410.56	-95.1431	-78.8672	348.009	-73.0992	394.684	336.992	389.058	155.55	-33.8412	264.685	16.1598
124	452022	V. rupestris B38 x 'Horizon'	right	337.675	-80.6602	-320.965	-604.668	149.264	-206.418	-360.35	-142.703	-414.946	-76.1303	-83.4666	342.681	-57.5067	373.555	309.735	404.75	143.174	-25.624	297.386	15.2176
125	452022	V. rupestris B38 x 'Horizon'	right	318.976	-70.3325	-308.278	-612.468	133.989	-212.123	-341.144	-118.265	-417.434	-90.9914	-90.5738	349.208	-94.7223	399.811	345.256	369.476	166.734	-23.8953	287.197	9.58017
126	452022	V. rupestris B38 x 'Horizon'	right	309.565	-71.7406	-270.29	-600.297	138.181	-219.846	-376.115	-148.297	-463.733	-89.8536	-51.3487	342.652	-45.495	389.388	347.427	366.379	139.615	-15.6073	272.194	47.2225
127	452023	V. rupestris B38 x 'Horizon'	right	342.409	-27.428	-398.916	-599.902	123.738	-225.872	-346.705	-157.308	-404.051	-110.015	-52.4641	303.184	-57.8512	340.394	297.134	394.103	212.29	-5.49565	284.415	88.3395
128	452023	V. rupestris B38 x 'Horizon'	right	367.54	-34.9622	-413.838	-573.01	157.342	-185.008	-338.413	-149.766	-413.28	-134.388	-77.6785	293.2	-77.5988	355.861	295.246	378.671	188.859	-3.00014	311.823	52.4018
129	452023	V. rupestris B38 x 'Horizon'	right	351.598	-54.0716	-391.991	-558.305	132.305	-198.516	-312.114	-169.747	-408.136	-112.102	-92.4487	295.902	-107.505	355.892	342.257	423.452	171.06	-11.7723	314.976	29.2671
130	452023	V. rupestris B38 x 'Horizon'	right	317.15	-38.3104	-291.991	-634.302	148.631	-179.186	-360.585	-126.518	-473.063	-43.7327	-68.1005	283.813	-70.865	352.245	370.789	388.76	142.732	-11.0288	285.302	8.26051
131	452023	V. rupestris B38 x 'Horizon'	right	345.907	-41.7892	-400.907	-590.444	162.56	-204.792	-318.589	-163.298	-411.929	-95.9557	-74.2055	282.405	-80.7194	348.554	330.075	426.786	148.386	6.20085	299.421	32.3318
132	452023	V. rupestris B38 x 'Horizon'	right	318.458	-52.4528	-361.36	-617.106	158.846	-202.892	-317.219	-167.69	-432.271	-90.9408	-47.2458	324.211	-45.9777	399.12	299.17	403.889	144.407	-18.6335	283.194	22.496
133	452027	V. rupestris B38 x 'Horizon'	right	384.762	-55.28	-317.718	-524.138	156.172	-212.088	-373.186	-116.584	-457.249	-70.016	-111.27	268.949	-112.09	330.927	302.902	409.741	173.962	-25.2904	353.715	-6.21941
134	452027	V. rupestris B38 x 'Horizon'	right	355.928	-61.9282	-347.244	-546.818	153.71	-181.899	-349.693	-162.908	-469.603	-93.2884	-78.1854	290.611	-78.313	340.969	304.303	417.327	170.256	-7.16689	338.842	5.10135
135	452027	V. rupestris B38 x 'Horizon'	right	359.908	-17.782	-404.828	-606.185	165.069	-159.545	-350.201	-147.935	-432.241	-104.874	-78.5945	278.816	-71.8569	314.789	333.047	362.677	171.598	8.31364	308.1	71.725
136	452027	V. rupestris B38 x 'Horizon'	right	372.373	-50.4527	-406.718	-572.006	167.419	-187.778	-325.012	-122.735	-407.789	-80.4355	-109.664	281.404	-113.749	331.087	270.911	397.178	202.569	-18.0542	349.658	21.7931
137	452027	V. rupestris B38 x 'Horizon'	right	345.714	-63.9145	-322.712	-588.689	124.433	-198.462	-366.589	-140.241	-442.704	-95.003	-75.0978	317.691	-72.6674	356.513	329.182	398.312	172.297	-8.58738	308.145	22.3807
138	452027	V. rupestris B38 x 'Horizon'	right	342.249	-58.831	-324.469	-526.619	124.185	-215.766	-345.85	-152.963	-433.137	-108.087	-107.965	323.452	-111.173	355.018	350.55	418.618	179.706	-30.9107	325.902	-3.91194
139	452028	V. rupestris B38 x 'Horizon'	right	352.972	-65.3407	-382.847	-595.297	177.224	-161.304	-341.547	-143.49	-417.038	-99.7798	-92.9505	300.038	-89.056	345.56	337.738	395.369	154.164	-10.8915	301.341	35.1367
140	452028	V. rupestris B38 x 'Horizon'	right	371.068	-56.5601	-418.114	-615.246	183.22	-179.264	-324.843	-103.74	-392.14	-50.7002	-77.0609	269.223	-119.849	302.547	273.832	417.494	199.09	-23.0653	304.798	39.3105
141	452028	V. rupestris B38 x 'Horizon'	right	324.87	-58.751	-374.904	-598.226	151.878	-167.863	-340.263	-158.479	-419.535	-135.204	-48.8352	321.595	-64.5456	377.252	335.915	402.71	168.368	-20.3266	267.052	37.2914
142	452028	V. rupestris B38 x 'Horizon'	right	329.359	-52.5255	-399.224	-672.013	154.397	-163.34	-320.53	-150.973	-372.821	-72.5656	-62.4052	323.156	-53.718	368.745	302.646	382.605	157.499	-4.02846	264.796	40.94
143	452028	V. rupestris B38 x 'Horizon'	right	345.993	-48.5347	-371.361	-652.036	149.901	-202.384	-336.085	-119.142	-397.413	-59.6797	-67.4163	314.73	-69.4863	360.853	283.285	390.195	166.223	-15.5414	296.36	31.5385
144	452028	V. rupestris B38 x 'Horizon'	right	381.644	-78.6529	-369.578	-616.723	153.756	-187.989	-318.637	-92.7629	-397.38	-68.3263	-109.397	292.27	-105.307	351.54	309.474	408.569	143.359	-26.4126	312.066	18.4879
145	452029	V. rupestris B38 x 'Horizon'	right	363.876	-44.8825	-425.074	-563.409	162.36	-188.473	-338.956	-169.488	-396.107	-114.09	-75.7855	287.616	-74.6878	332.592	287.533	422.757	193.736	-9.22841	303.105	46.6058
146	452029	V. rupestris B38 x 'Horizon'	right	394.946	-39.286	-491.349	-535.656	196.456	-185.231	-276.7	-136.436	-371.333	-119.766	-102.177	265.787	-93.8415	313.103	213.44	407.36	195.015	-20.3279	335.544	50.4538
147	452029	V. rupestris B38 x 'Horizon'	right	338.365	-61.1847	-364.836	-548.554	128.918	-211.748	-288.549	-203.286	-441.271	-77.5922	-93.3468	312.322	-89.3433	381.818	314.782	430.112	192.322	-29.5976	302.959	7.71121
148	452029	V. rupestris B38 x 'Horizon'	right	382.147	-60.5851	-443.099	-489.774	159.896	-213.963	-324.383	-189.548	-354.388	-137.283	-89.1533	289.889	-93.6585	332.756	263.675	454.859	184.523	-22.384	314.443	36.0312
149	452029	V. rupestris B38 x 'Horizon'	right	357.832	-52.1974	-417.974	-520.209	160.999	-185.698	-276.094	-167.374	-432.527	-137.974	-94.8609	279.652	-116.842	367.386	320.911	423.465	184.319	-23.9582	314.238	16.9073
150	452029	V. rupestris B38 x 'Horizon'	right	327.29	-45.4756	-370.557	-626.03	142.369	-175.707	-286.815	-161.692	-490.215	-67.1403	-50.952	279.783	-47.3498	327.343	335.944	420.359	161.819	-6.8074	278.466	55.3666
151	452030	V. rupestris B38 x 'Horizon'	right	324.91	-82.093	-302.825	-597.931	153.898	-218.073	-350.672	-151.121	-441.679	-77.5433	-74.7176	333.291	-61.7953	393.02	336.12	398.165	145.958	-16.3722	270.801	18.6567
152	452030	V. rupestris B38 x 'Horizon'	right	307.259	-55.0159	-267.999	-555.157	112.45	-205.658	-368.495	-172.231	-460.331	-127.509	-68.0062	341.573	-49.8009	395.717	382.304	388.033	128.143	-11.8644	284.476	2.11243
153	452030	V. rupestris B38 x 'Horizon'	right	341.729	-59.6676	-328.497	-581.436	133.373	-222.627	-347.807	-156.187	-428.081	-117.764	-75.9343	339.778	-60.6965	382.954	342.165	387.526	126.565	-7.73443	297.183	35.1581
154	452030	V. rupestris B38 x 'Horizon'	right	335.127	-75.9721	-304.415	-546.331	109.091	-238.214	-358.5	-163.19	-432.361	-116.284	-61.0848	329.182	-72.6532	387.493	341.691	424.343	159.152	-38.8376	283.952	37.8113
155	452030	V. rupestris B38 x 'Horizon'	right	332.912	-66.241	-318.482	-576.605	126.095	-232.333	-346.504	-156.651	-415.252	-109.608	-85.2661	349.648	-76.52	393.139	339.973	382.492	129.548	-9.65136	313.497	25.8107
156	452030	V. rupestris B38 x 'Horizon'	right	318.263	-73.5862	-307.983	-632.32	152.325	-207.73	-358.338	-121.122	-432.885	-73.4822	-69.6777	334.229	-58.4727	390.184	318.333	374.733	154.608	-21.9497	283.826	31.0442
157	452031	V. rupestris B38 x 'Horizon'	right	365.31	-65.1867	-371.239	-596.696	125.351	-188.472	-339.16	-133.717	-417.764	-106.738	-81.8502	301.745	-77.1254	346.818	320.457	405.99	158.161	-11.7915	317.859	48.0473
158	452031	V. rupestris B38 x 'Horizon'	right	380.094	-17.5495	-436.869	-603.786	141.364	-177.375	-325.784	-140.247	-398.596	-96.4186	-79.5891	271.921	-79.6974	300.46	292.241	396.583	186.077	3.11201	320.759	63.3003
159	452031	V. rupestris B38 x 'Horizon'	right	416.965	-48.457	-393.094	-546.031	159.93	-227.402	-323.612	-125.98	-421.49	-63.1818	-107.454	276.152	-124.57	311.133	267	399.156	190.455	-12.7233	335.87	37.3345
160	452031	V. rupestris B38 x 'Horizon'	right	392.663	-61.0956	-391.666	-569.184	150.412	-190.533	-348.351	-136.143	-411.437	-92.8472	-90.4228	289.424	-97.4464	326.819	285.532	400.252	181.021	-14.6331	329.695	47.941
161	452031	V. rupestris B38 x 'Horizon'	right	395.602	-47.8585	-396.185	-586.238	168.515	-204.687	-343.518	-134.677	-405.663	-98.3606	-89.4797	304.663	-81.92	350.868	274.841	369.493	161.576	-0.665065	316.231	47.4633
162	452031	V. rupestris B38 x 'Horizon'	right	374.337	-68.7928	-332.623	-544.175	152.984	-206.67	-362.52	-138.221	-452.808	-99.6888	-101.924	313.106	-90.656	349.093	313.952	386.464	176.048	-21.9292	323.212	30.8148
163	452032	V. rupestris B38 x 'Horizon'	right	386.538	-88.3673	-383.04	-566.858	217.638	-200.77	-319.356	-107.133	-421.753	-47.0889	-109.268	277.33	-124.766	337.608	259.961	409.697	176.78	-23.4995	317.267	9.08199
164	452032	V. rupestris B38 x 'Horizon'	right	366.984	-94.6864	-335.52	-588.847	171.614	-226.52	-340.003	-140.844	-413.524	-75.1431	-74.3788	327.702	-72.4072	388.244	299.764	418.28	146.548	-28.9124	250.923	20.7278
165	452032	V. rupestris B38 x 'Horizon'	right	361.894	-94.1007	-370.351	-613.568	202.15	-204.505	-322.344	-109.724	-408.677	-46.3114	-79.5116	278.151	-116.933	377.319	286.89	401.534	158.562	-18.1754	288.321	29.3806
166	452032	V. rupestris B38 x 'Horizon'	right	337.317	-74.9395	-388.359	-607.834	151.714	-182.131	-321.731	-145.846	-408.657	-115.683	-48.6568	314.999	-57.456	388.545	283.768	417.62	185.395	-34.2797	266.666	39.5494
167	452032	V. rupestris B38 x 'Horizon'	right	366.134	-85.2692	-395.275	-615.822	185.109	-209.338	-290.029	-91.2179	-370.767	-52.4772	-101.341	303.735	-128.451	368.185	267.237	413.888	176.461	-32.4712	290.923	0.786982
168	452032	V. rupestris B38 x 'Horizon'	right	344.206	-70.8779	-372.479	-513.028	164.389	-196.37	-323.562	-185.914	-414.203	-143.729	-84.8424	320.712	-115.875	397.726	343.462	405.467	176.544	-33.7171	282.36	19.7311
169	452033	V. rupestris B38 x 'Horizon'	right	394.71	-58.0686	-412.162	-458.462	180.668	-213.505	-317.091	-173.759	-401.637	-137.099	-119.675	287.112	-139.355	331.967	308.05	411.979	167.83	-21.9708	338.663	31.8067
170	452033	V. rupestris B38 x 'Horizon'	right	340.346	-43.7201	-346.849	-595.912	149.173	-196.648	-361.851	-147.543	-434.336	-95.2561	-78.9595	314.008	-70.0479	359.584	332.248	388.909	173.995	-15.3412	296.28	31.919
171	452033	V. rupestris B38 x 'Horizon'	right	361.52	-85.0127	-355.64	-468.588	142.775	-228.626	-340.06	-185.038	-431.356	-134.217	-92.1756	298.079	-109.614	354.053	328.784	440.52	187.009	-30.3921	308.758	39.2222
172	452033	V. rupestris B38 x 'Horizon'	right	337.981	-69.8681	-356.521	-590.621	164.095	-198.283	-336.019	-123.16	-415.297	-71.7598	-106.505	302.525	-94.5387	354.278	312.762	422.762	168.519	-30.9819	325.525	5.10821
173	452033	V. rupestris B38 x 'Horizon'	right	377.796	-90.9811	-379.872	-576.514	176.785	-219.327	-324.813	-125.077	-393.395	-78.6512	-88.3032	301.156	-108.099	381.574	265.324	412.082	175.564	-23.9533	299.013	19.6919
174	452033	V. rupestris B38 x 'Horizon'	right	346.419	-92.2967	-278.492	-533.225	159.582	-224.044	-360.601	-137.609	-455.067	-92.3575	-104.627	321.756	-105.745	374.798	371.356	398.116	134.443	-29.1363	292.732	13.998
175	452034	V. rupestris B38 x 'Horizon'	right	392.293	-79.264	-409.8	-572.391	150.679	-214.211	-309.635	-131.928	-394.646	-93.441	-84.7585	305.812	-90.1392	347.71	243.928	412.758	181.495	-29.6737	320.584	54.6282
176	452034	V. rupestris B38 x 'Horizon'	right	376.457	-49.6648	-404.361	-608.577	204.792	-184.401	-337.956	-134.803	-415.771	-79.3716	-83.7481	292.817	-74.1369	349.713	279.626	370.117	164.755	-13.3015	290.342	57.4716
177	452034	V. rupestris B38 x 'Horizon'	right	362.191	-54.3977	-361.78	-583.576	159.073	-194.302	-331.605	-137.413	-421.525	-95.5577	-104.202	311.722	-97.1458	354.956	336.239	394.692	136.656	-1.63088	322.097	5.50841
178	452034	V. rupestris B38 x 'Horizon'	right	346.415	-45.5033	-340.684	-659.858	164.606	-181.141	-345.773	-119.017	-444.756	-45.0856	-69.4384	301.429	-78.3368	356.456	323.39	341.668	159.235	-2.13373	285.342	53.1862
179	452034	V. rupestris B38 x 'Horizon'	right	352.795	-79.5098	-349.558	-590.186	148.101	-208.803	-335.753	-123.698	-405.937	-78.147	-105.187	300.684	-114.272	356.229	352.989	414.408	163.464	-23.7917	293.36	32.8143
180	452034	V. rupestris B38 x 'Horizon'	right	380.421	-68.06	-403.086	-595.627	159.149	-218.382	-309.727	-131.322	-393.91	-57.4087	-97.5142	298.013	-115.294	339.762	274.474	399.856	201.09	-14.8421	304.396	48.0101
181	452035	V. rupestris B38 x 'Horizon'	right	330.263	-44.0109	-352.089	-565.344	144.182	-189.964	-344.547	-187.72	-421.438	-118.693	-92.7633	330.037	-74.7996	380.073	358.164	390.319	158.559	-3.07695	294.47	8.3789
182	452035	V. rupestris B38 x 'Horizon'	right	334.054	-54.5812	-275.498	-614.546	147.544	-201.241	-393.219	-141.084	-449.198	-53.3605	-64.3175	318.899	-63.6683	374.655	344.605	369.426	137.824	-22.6065	281.874	24.4385
183	452035	V. rupestris B38 x 'Horizon'	right	375.559	-85.4087	-323.311	-589.538	158.196	-208.851	-369.937	-134.155	-442.62	-82.9093	-71.9289	314.374	-72.3368	370.165	302.985	378.265	154.447	-1.32585	288.947	39.3826
184	452035	V. rupestris B38 x 'Horizon'	right	362.537	-55.1932	-384.707	-564.972	160.141	-204.635	-318.277	-147.673	-420.109	-82.3622	-111.406	303.191	-120.29	342.752	317.232	394.786	185.14	-15.3652	329.739	29.4723
185	452035	V. rupestris B38 x 'Horizon'	right	369.049	-84.8433	-333.645	-568.926	121.375	-205.99	-337.108	-129.79	-418.167	-95.2887	-97.48	306.408	-103.384	372.139	329.931	419.613	151.609	-20.5155	317.821	7.19441
186	452035	V. rupestris B38 x 'Horizon'	right	350.56	-54.8841	-362.518	-614.965	154.389	-197.157	-344.518	-130.207	-404.686	-59.3848	-93.3978	302.626	-102.235	356.087	314.473	393.068	173.817	-19.082	314.115	23.8979
187	452036	V. rupestris B38 x 'Horizon'	right	357.79	-63.4059	-306.546	-569.469	154.907	-164.959	-374.938	-120.782	-483.755	-81.6817	-67.708	296.529	-78.2844	347.85	302.98	405.914	197.651	-34.8819	297.904	-15.1133
188	452036	V. rupestris B38 x 'Horizon'	right	365.465	-85.476	-320.965	-532.499	165.028	-182.365	-367.41	-146.927	-447.872	-90.8748	-105.796	309.414	-111.782	360.188	322.857	395.192	182.014	-20.7755	318.461	-5.87775
189	452036	V. rupestris B38 x 'Horizon'	right	390.538	-62.8983	-391.378	-510.485	173.947	-203.078	-328.687	-149.775	-418.079	-92.5592	-116.88	290.657	-135.461	329.405	287.181	404.875	193.525	-24.9152	345.294	18.7743
190	452036	V. rupestris B38 x 'Horizon'	right	325.617	-68.1903	-361.351	-509.393	157.358	-176.468	-340.136	-165.23	-434.428	-167.613	-82.4036	312.748	-105.547	386.424	349.66	405.518	197.905	-26.0276	293.326	8.23157
191	452036	V. rupestris B38 x 'Horizon'	right	378.544	-70.7874	-413.283	-459.408	182.593	-207.348	-295.954	-163.25	-423.341	-152.375	-104.842	290.435	-124.891	348.123	288.329	432.448	193.602	-32.7087	319.243	14.8718
192	452036	V. rupestris B38 x 'Horizon'	right	311.109	-67.8303	-304.215	-564.244	129.35	-191.377	-355.421	-154.059	-443.195	-121.475	-85.6935	335.378	-84.5585	388.214	372.746	392.964	171.911	-20.5168	287.967	2.94607
193	452037	V. rupestris B38 x 'Horizon'	right	376.198	-79.9682	-349.295	-538.121	131.128	-242.388	-315.174	-164.572	-397.607	-67.5075	-120.915	301.086	-123.315	361.73	335.18	431.88	138.5	-21.6485	325.3	19.5089
194	452037	V. rupestris B38 x 'Horizon'	right	349.553	-44.5482	-381.56	-600.962	133.862	-202.814	-342.224	-156.64	-407.807	-98.9253	-72.0217	283.931	-68.9195	347.389	339.435	417.066	146.623	-1.84428	303.06	57.3469
195	452037	V. rupestris B38 x 'Horizon'	right	363.676	-82.6053	-329.955	-562.913	123.508	-219.184	-313.299	-158.307	-454.752	-44.002	-96.2307	279.494	-120.476	346.106	344.962	426.859	168.067	-24.2053	314.501	38.7571
196	452037	V. rupestris B38 x 'Horizon'	right	341.89	-55.5919	-402.089	-541.831	129.796	-225.375	-284.96	-198.513	-410.547	-98.9041	-98.8309	278.69	-98.938	351.009	353.907	441.57	160.084	-16.7165	309.689	65.6615
197	452037	V. rupestris B38 x 'Horizon'	right	341.671	-72.2662	-361.712	-457.412	119.804	-209.722	-303.886	-217.833	-430.488	-173.681	-100.663	309.576	-108.411	373.703	389.15	415.832	156.208	-18.9936	298.327	50.7972
198	452037	V. rupestris B38 x 'Horizon'	right	367.099	-79.2455	-399.152	-487.797	156.694	-222.39	-283.279	-192.642	-438.165	-118.372	-90.57	278.727	-119.675	357.957	313.872	441.801	186.006	-17.277	307.17	39.2384
199	452038	V. rupestris B38 x 'Horizon'	right	338.587	-86.0176	-357.253	-634.922	179.134	-186.716	-335.723	-102.827	-395.576	-68.908	-78.2377	322.976	-81.5673	357.59	296.594	416.256	137.335	-15.1162	296.707	-2.31479
200	452038	V. rupestris B38 x 'Horizon'	right	347.192	-81.6717	-322.135	-623.558	181.555	-217.198	-339.814	-120.557	-439.577	-56.224	-53.5969	331.877	-62.2349	379.684	279.517	397.485	128.406	-23.6733	280.688	13.8361
201	452038	V. rupestris B38 x 'Horizon'	right	283.35	-84.3218	-274.521	-694.235	111.087	-200.742	-247.617	-128.459	-473.387	-28.1468	-36.8592	350.784	-24.7209	415.847	317.07	372.141	100.81	-16.3048	244.787	13.4373
202	452038	V. rupestris B38 x 'Horizon'	right	381.99	-48.0772	-439.163	-548.32	162.743	-217.187	-317.237	-150.383	-363.364	-130.264	-93.4846	290.138	-99.1254	333.979	310.659	423.728	171.383	-28.5503	285.599	74.9366
203	452038	V. rupestris B38 x 'Horizon'	right	331.149	-36.6483	-366.255	-634.755	147.713	-212.265	-328.602	-152.142	-421.895	-85.2936	-40.8471	315.696	-25.0767	367.062	300.007	421.58	133.929	-20.0051	269.878	36.7712
204	452038	V. rupestris B38 x 'Horizon'	right	331.009	-54.3344	-326.804	-635.295	131.135	-195.401	-337.721	-139.65	-423.206	-89.558	-75.8607	332.576	-72.1861	387.842	366.575	360.813	142.532	-14.7751	264.526	47.7836
205	452040	V. rupestris B38 x 'Horizon'	right	382.532	-71.5215	-327.465	-604.134	151.21	-203.885	-333.374	-177.118	-464.744	-5.73065	-73.2976	319.961	-62.6167	346.02	262.823	384.315	171.562	-29.1053	293.369	41.1997
206	452040	V. rupestris B38 x 'Horizon'	right	446.48	-23.1216	-420.479	-555.697	205.044	-214.396	-348.73	-109.112	-420.213	-41.4342	-86.3146	238.931	-92.4642	273.319	203.407	369.447	195.077	-18.187	318.193	80.2508
207	452040	V. rupestris B38 x 'Horizon'	right	408.916	-58.8391	-381.029	-579.792	171.827	-222.7	-352.665	-107.946	-419.565	-54.3872	-83.7885	286.801	-85.0413	319.603	220.215	389.349	198.295	-18.6648	322.835	46.576
208	452040	V. rupestris B38 x 'Horizon'	right	376.531	-91.4757	-326.509	-547.226	145.91	-231.616	-351.501	-136.05	-453	-68.8282	-87.3278	297.839	-94.3601	329.414	306.637	427.72	167.548	-25.0985	316.072	45.3205
209	452040	V. rupestris B38 x 'Horizon'	right	348.785	-84.7664	-300.113	-586.755	136.758	-225.261	-364.813	-144.831	-448.428	-93.6802	-61.4342	338.316	-52.1141	383.778	315.262	389.2	150.641	-19.0763	275.456	43.077
210	452040	V. rupestris B38 x 'Horizon'	right	377.363	-42.8667	-344.402	-582.974	162.837	-227.405	-361.82	-121.058	-433.078	-65.5411	-93.0363	307.455	-98.1208	344.339	297.269	374.559	173.634	-24.693	319.353	38.1836
211	452042	V. rupestris B38 x 'Horizon'	right	342.323	-34.4807	-377.651	-657.085	168.131	-204.376	-328.458	-131.538	-425.421	-59.9466	-63.305	297.564	-63.1419	343.524	322.916	370.516	153.499	5.48633	271.107	70.3357
212	452042	V. rupestris B38 x 'Horizon'	right	324.375	-68.1009	-327.996	-603.758	128.023	-226.179	-327.69	-135.328	-424.642	-96.427	-74.4068	336.066	-75.7967	393.932	325.849	402.579	158.474	-13.4079	293.812	10.6245
213	452042	V. rupestris B38 x 'Horizon'	right	300.453	-74.3607	-245.852	-607.685	143.392	-195.63	-359.941	-146.186	-468.194	-60.0658	-80.1334	343.426	-69.6889	404.411	372.451	349.33	128.43	-27.0851	279.083	13.8455
214	452042	V. rupestris B38 x 'Horizon'	right	302.92	-40.874	-291.797	-637.534	140.482	-191.1	-359.168	-129.656	-470.71	-55.0368	-60.2296	303.676	-51.7307	351.23	355.032	392.292	134.771	-0.416338	300.431	7.42027
215	452042	V. rupestris B38 x 'Horizon'	right	349.404	-26.8512	-375.223	-590.119	188.035	-171.905	-340.937	-144.894	-429.886	-115.147	-97.2508	315.295	-68.6534	357.487	330.996	367.884	120.217	3.12219	323.297	5.12889
216	452042	V. rupestris B38 x 'Horizon'	right	293.648	-61.5212	-300.951	-638.156	120.349	-192.981	-328.136	-161.817	-439.371	-93.368	-56.2258	341.128	-52.5484	424.066	364.958	351.829	135.947	-1.89667	262.33	32.7171
217	452043	V. rupestris B38 x 'Horizon'	right	294.488	-97.2221	-292.525	-593.005	133.94	-225.46	-333.968	-140.324	-431.713	-89.3893	-69.367	358.43	-58.8425	402.238	324.089	423.369	169.85	-41.0506	264.046	2.41324
218	452043	V. rupestris B38 x 'Horizon'	right	312.283	-60.5202	-347.051	-661.739	159.903	-203.539	-324.666	-104.377	-392.343	-73.4459	-80.3623	321.658	-91.4304	371.199	362.102	380.295	128.272	2.77759	273.292	27.692
219	452043	V. rupestris B38 x 'Horizon'	right	281.994	-71.0683	-236.268	-630.112	127.658	-202.834	-357.447	-111.284	-437.133	-59.5935	-82.577	349.641	-79.5379	399.609	389.226	369.237	132.612	-27.858	261.472	-15.7376
220	452043	V. rupestris B38 x 'Horizon'	right	343.33	-53.3912	-397.244	-556.37	173.053	-204.074	-315.226	-157.397	-399.664	-120.84	-91.3854	321.024	-100.983	370.537	308.804	412.75	159.927	-19.3457	319.389	7.10627
221	452043	V. rupestris B38 x 'Horizon'	right	318.181	-85.5098	-322.08	-612.404	145.757	-205.127	-338.105	-134.852	-419.605	-80.6717	-78.0542	324.644	-85.8379	386.99	347.255	404.938	140.675	-19.753	291.815	21.7447
222	452006	V. rupestris B38 x 'Horizon'	right	316.489	-49.8819	-407.654	-608.386	185.864	-195.368	-326.278	-155.633	-401.787	-108.037	-49.0505	315.481	-57.5023	364.431	289.687	417.958	175.487	-20.9652	274.745	40.4
223	452044	V. rupestris B38 x 'Horizon'	right	376.162	-87.0256	-414.409	-622.7	156.861	-231.074	-250.204	-62.7729	-314.214	44.1955	-135.507	210.739	-164.3	268.495	267.783	467.877	153.92	-5.52558	323.907	17.7911
224	452044	V. rupestris B38 x 'Horizon'	right	366.378	-66.6314	-358.112	-556.572	148.715	-215.147	-323.671	-141.672	-432.655	-88.8174	-98.7208	297.866	-115.613	347.707	333.694	418.064	156.687	-13.7817	323.297	18.9842
225	452044	V. rupestris B38 x 'Horizon'	right	334.149	-89.0122	-271.93	-555.821	132.174	-206.594	-355.565	-150.836	-452.409	-109.416	-92.5952	338.374	-87.2629	401.12	381.715	377.164	133.67	-15.9305	278.054	10.9513
226	452044	V. rupestris B38 x 'Horizon'	right	310.099	-88.9781	-291.389	-574.764	142.404	-215.3	-346.345	-154.569	-411.131	-77.074	-100.043	312.089	-125.38	404.875	404.96	387.655	129.183	-15.6188	287.643	21.6852
227	452044	V. rupestris B38 x 'Horizon'	right	358.308	-109.54	-327.68	-567.363	133.232	-219.266	-288.575	-156.739	-443.175	-58.5505	-104.437	305.653	-108.165	376.06	336.43	427.619	128.73	-16.1344	315.332	18.2611
228	452044	V. rupestris B38 x 'Horizon'	right	382.693	-49.6712	-384.968	-588.486	173.204	-229.622	-343.567	-135.202	-431.613	-62.3599	-61.1554	284.008	-82.9676	314.936	278.412	410.183	173.126	-15.5173	296.837	71.7311
229	452045	V. rupestris B38 x 'Horizon'	right	379.745	-119.818	-226.65	-479.958	124.844	-274.599	-377.776	-141.492	-394.746	-111.826	-114.8	337.182	-96.9488	397.292	379.878	405.363	55.6795	-11.2642	270.775	-0.881149
230	452045	V. rupestris B38 x 'Horizon'	right	351.545	-63.1264	-345.583	-586.425	169.031	-217.076	-336.161	-128.69	-428.661	-95.7644	-88.3357	311.097	-99.9945	367.317	349.812	397.389	139.134	-4.26584	289.214	19.5442
231	452045	V. rupestris B38 x 'Horizon'	right	299.496	-66.1216	-227.935	-604.648	120.309	-207.191	-389.739	-115.091	-466.66	-86.0611	-93.2788	342.359	-44.9501	381.307	387.949	341.503	145.153	-20.168	269.656	34.1106
232	452045	V. rupestris B38 x 'Horizon'	right	384.333	-95.4596	-341.984	-569.056	181.214	-236.839	-348.574	-91.6474	-415.922	-41.1915	-109.423	295.511	-124.629	348.182	254.413	389.139	191.754	-31.2299	328.819	32.5922
233	452045	V. rupestris B38 x 'Horizon'	right	377.187	-43.2982	-393.728	-520.945	179.653	-188.485	-347.032	-159.937	-423.07	-121.332	-121.025	288.54	-119.661	323.019	342.194	374.601	174.84	5.35244	330.643	42.4844
234	452045	V. rupestris B38 x 'Horizon'	right	367.227	-39.2792	-374.933	-569.89	123.911	-208.9	-363.544	-148.049	-418.038	-113.244	-82.6586	277.273	-79.9835	332.981	335.242	402.709	177.738	2.33671	315.039	64.0613
235	452046	V. rupestris B38 x 'Horizon'	right	333.188	-68.0171	-328.507	-580.058	160.413	-209.133	-334.324	-168.818	-447.834	-75.9763	-91.1568	329.028	-86.34	395.479	328.432	373.207	168.122	-25.992	298.007	30.2796
236	452046	V. rupestris B38 x 'Horizon'	right	310.317	-71.0308	-328.576	-609.761	132.067	-212.778	-298.234	-174.044	-449.221	-63.5349	-78.6033	332.104	-76.2681	398.356	335.491	395.363	168.964	-11.9113	284.064	17.2369
237	452046	V. rupestris B38 x 'Horizon'	right	318.506	-71.6358	-281.231	-607.922	144.639	-198.383	-343.08	-174.959	-478.031	-46.6837	-60.7726	327.305	-49.45	395.148	332.027	387.521	147.539	-22.2642	269.854	11.8729
238	452046	V. rupestris B38 x 'Horizon'	right	316.936	-96.0214	-294.526	-458.794	172.78	-235.159	-373.541	-178.332	-454.286	-110.675	-95.7018	314.765	-103.236	370.327	322.622	431.59	191.133	-35.545	317.819	-2.1563
239	452046	V. rupestris B38 x 'Horizon'	right	308.083	-41.9973	-315.832	-676.076	141.335	-200.162	-350.538	-109.375	-441.679	-54.0587	-49.0048	320.412	-35.1892	385.703	293.135	351.911	162.368	-23.058	287.322	46.7015
240	452046	V. rupestris B38 x 'Horizon'	right	286.973	-65.817	-271.905	-597.37	129.3	-220.717	-321.549	-180.617	-485.92	-63.342	-57.8052	348.353	-52.7763	398.19	355.911	385.718	150.657	-26.8895	267.116	22.491
241	452047	V. rupestris B38 x 'Horizon'	right	352.616	-73.8093	-405.888	-613.698	164.607	-159.908	-294.962	-134.446	-418.711	-47.6005	-81.4363	269.375	-122.279	328.979	297.217	421.204	191.677	-16.9695	317.159	26.8723
242	452047	V. rupestris B38 x 'Horizon'	right	349.188	-29.7588	-402.969	-577.15	144.989	-178.786	-324.257	-165.825	-418.952	-130.341	-80.3607	300.8	-84.1033	370.185	329.294	382.046	192.138	-20.8337	295.034	49.6637
243	452047	V. rupestris B38 x 'Horizon'	right	402.91	-19.4725	-441.207	-546.646	142.778	-189.668	-307.131	-172.679	-433.057	-84.7736	-54.287	236.052	-74.3321	299.717	238.278	432.709	184.843	-9.13824	341.204	53.8998
244	452047	V. rupestris B38 x 'Horizon'	right	404.429	-43.641	-451.202	-495.954	167.954	-195.731	-294.066	-153.276	-407.715	-128.123	-94.1734	243.5	-133.438	327.267	268.583	409.478	192.651	-15.1173	346.976	51.5972
245	452047	V. rupestris B38 x 'Horizon'	right	388.711	-66.927	-428.557	-519.256	145.674	-185.663	-290.346	-167.389	-404.277	-118.958	-90.6173	252.613	-129.205	362.688	296.13	431.264	198.003	-22.0999	314.485	33.7273
246	452047	V. rupestris B38 x 'Horizon'	right	371.439	-25.9504	-472.703	-507.199	177.044	-166.109	-292.087	-180.079	-408.988	-155.044	-67.4402	242.709	-111.949	313.495	304.551	425.332	176.93	3.19348	323.204	49.6519
247	452048	V. rupestris B38 x 'Horizon'	right	352.528	-60.8076	-365.737	-601.437	165.552	-213.323	-319.43	-141.631	-417.006	-58.845	-102.247	306.12	-96.4849	357.276	317.223	405.998	153.94	-10.1599	311.661	16.8096
248	452048	V. rupestris B38 x 'Horizon'	right	316.514	-62.2348	-311.684	-623.554	154.84	-208.791	-325.319	-135.525	-469.357	-71.0437	-46.0909	306.292	-50.5527	376.59	339.096	420.792	124.971	-11.4169	267.582	8.89113
249	452048	V. rupestris B38 x 'Horizon'	right	375.933	-68.6495	-360.354	-597.05	157.035	-224.295	-308.267	-135.817	-438.852	-57.5681	-76.0208	287.098	-95.9725	368.875	307.878	416.978	163.045	-27.6052	275.576	38.0345
250	452048	V. rupestris B38 x 'Horizon'	right	364.945	-60.5658	-337.547	-555.042	147.891	-219.68	-352.93	-155.196	-453.746	-80.508	-84.3355	284.479	-84.3621	352.926	330.535	418.552	171.051	-28.1444	298.499	43.1783
251	452048	V. rupestris B38 x 'Horizon'	right	393.725	-46.3267	-368.885	-614.794	160.432	-230.491	-315.315	-136.087	-433.098	6.69137	-63.7059	273.9	-95.4844	321.412	243.783	414.132	166.215	-20.6777	312.333	32.241
252	452048	V. rupestris B38 x 'Horizon'	right	354.356	-60.4398	-338.858	-565.312	151.593	-209.057	-319.938	-151.643	-458.919	-84.1107	-89.1977	298.629	-108.686	368.358	355.065	403.152	158.551	-27.4738	296.034	27.8974
253	452049	V. rupestris B38 x 'Horizon'	right	379.158	-44.8668	-414.274	-604.991	146.741	-163.019	-311.727	-151.788	-443.051	-98.6094	-48.2401	276.73	-72.7814	350.306	273.419	385.277	197.84	-11.5079	292.915	62.4689
254	452049	V. rupestris B38 x 'Horizon'	right	367.66	-59.6877	-366.612	-616.549	156.07	-181.781	-336.172	-134.344	-459.267	-66.6262	-65.3154	294.982	-73.798	353.016	269.854	358.241	190.295	-6.826	317.286	59.5743
255	452049	V. rupestris B38 x 'Horizon'	right	343.658	-75.2211	-407.413	-457.759	151.85	-205.953	-304.998	-192.09	-396.423	-193.066	-98.2786	308.751	-113.736	372.267	339.406	424.087	185.082	-21.2844	300.852	40.2687
256	452049	V. rupestris B38 x 'Horizon'	right	340.465	-34.0167	-417.47	-615.749	170.815	-205.587	-304.413	-157.537	-392.805	-82.1262	-85.6788	305.527	-87.7616	360.495	300.861	385.383	165.373	5.08051	310.616	38.531
257	452049	V. rupestris B38 x 'Horizon'	right	328.611	-62.7269	-364.419	-670.713	130.536	-213.801	-310.039	-123.024	-401.666	-54.3379	-67.7375	316.326	-67.7683	370.642	309.066	384.716	170.499	-4.37976	272.916	57.2991
258	452049	V. rupestris B38 x 'Horizon'	right	368.655	-36.3269	-472.198	-565.288	170.319	-178.208	-275.596	-145.32	-418.183	-135.915	-65.0666	273.284	-77.1853	310.037	261.012	414.656	195.461	-1.59378	312.782	64.675
259	452050	V. rupestris B38 x 'Horizon'	right	309.881	-95.6708	-265.783	-621.613	140.041	-230.879	-353.744	-142.67	-421.463	-68.2257	-70.3517	346.276	-65.1736	414.256	368.136	363.929	101.285	-9.58384	257.173	44.182
260	452050	V. rupestris B38 x 'Horizon'	right	363.371	-87.6732	-325.761	-589.161	164.353	-231.439	-338.888	-156.186	-405.923	-90.0635	-91.702	345.305	-38.3239	421.852	301.15	385.161	124.016	-38.2841	247.708	40.4894
261	452050	V. rupestris B38 x 'Horizon'	right	369.655	-87.6015	-339.602	-590.659	159.462	-213.647	-348.728	-142.55	-405.4	-73.8794	-88.6426	320.931	-84.6796	379.863	306.733	402.401	132.115	-14.5213	299.086	19.6644
262	452050	V. rupestris B38 x 'Horizon'	right	358.032	-93.7555	-316.536	-563.011	159.76	-226.537	-358.316	-136.737	-406.326	-83.9046	-102.989	333.928	-108.613	387.363	331.521	392.783	153.936	-31.8816	289.532	21.7527
263	452050	V. rupestris B38 x 'Horizon'	right	373.123	-70.1274	-422.567	-496.212	171.795	-233.708	-318.202	-170.048	-372.587	-119.638	-109.413	294.207	-111.315	336.585	281.634	445.528	192.343	-21.5641	315.189	34.9787
264	452050	V. rupestris B38 x 'Horizon'	right	355.443	-66.3973	-405.558	-649.499	171.943	-228.773	-309.791	-102.404	-360.418	-62.357	-84.1714	279.13	-85.9382	352.823	308.154	408.117	138.286	-4.17259	272.05	73.5336
265	452051	V. rupestris B38 x 'Horizon'	right	326.121	-74.1061	-335.725	-542.12	115.521	-221.382	-348.896	-169.025	-424.105	-135.064	-76.2561	317.386	-78.1376	370.685	358.033	423.283	151.279	-15.032	312.165	45.3767
266	452051	V. rupestris B38 x 'Horizon'	right	347.627	-65.8283	-337.109	-519.407	132.734	-228.924	-331.477	-220.083	-425.275	-108.905	-98.5617	335.535	-79.9198	386.016	347.557	399.139	132.683	-7.21092	311.742	29.6681
267	452051	V. rupestris B38 x 'Horizon'	right	321.165	-72.9342	-328.313	-597.87	130.043	-231.051	-343.922	-175.772	-425.964	-69.7846	-66.207	312.902	-66.4576	368.363	343.116	411.974	127.71	-3.33805	308.83	57.5104
268	452051	V. rupestris B38 x 'Horizon'	right	347.391	-82.689	-330.654	-546.055	132.953	-248.907	-340.751	-138.642	-439.673	-84.2123	-96.23	304.397	-90.4901	344.913	321.658	435.171	180.146	-30.225	315.652	46.251
269	452051	V. rupestris B38 x 'Horizon'	right	339.52	-56.5911	-313.125	-547.759	100.435	-216.505	-333.55	-205.246	-449.741	-115.197	-68.4824	325.737	-72.8534	382.227	382.372	393.635	118.201	-8.839	297.223	48.5377
270	452051	V. rupestris B38 x 'Horizon'	right	356.874	-58.2485	-351.198	-567.878	117.254	-220.935	-338.237	-163.952	-421.863	-117.127	-90.6712	322.584	-74.5724	373.113	334.226	390.291	151.065	-1.97953	317.122	44.1322
271	452058	V. rupestris B38 x 'Horizon'	right	310.181	-27.0207	-436.106	-564.069	172.329	-205.697	-293.399	-143.073	-397.755	-127.854	-85.9407	297.147	-101.312	350.975	295.579	417.975	205.744	-32.0617	330.681	33.6777
272	452058	V. rupestris B38 x 'Horizon'	right	345.032	-94.0212	-338.938	-584.481	178.769	-194.536	-329.611	-141.552	-440.722	-76.9648	-92.1769	322.693	-103.637	375.784	323.325	386.032	148.217	-16.5914	309.742	23.637
273	452058	V. rupestris B38 x 'Horizon'	right	293.505	-83.9944	-309.032	-652.939	133.513	-192.107	-329.435	-99.9278	-426.256	-80.5163	-72.533	332.579	-71.1904	385.232	350.479	392.042	153.788	-20.9262	277.162	20.5567
274	452058	V. rupestris B38 x 'Horizon'	right	346.973	-67.3137	-379.515	-602.282	143.871	-180.497	-302.443	-140.891	-416.34	-81.5339	-102.82	296.229	-123.998	341.155	364.208	394.939	149.848	-1.32525	320.217	41.5191
275	452058	V. rupestris B38 x 'Horizon'	right	339.234	-54.051	-383.31	-550.084	158.964	-214.973	-301.295	-176.299	-432.396	-128.732	-76.8144	326.292	-86.0618	388.036	319.43	405.599	172.307	-25.5244	289.941	29.7359
276	452058	V. rupestris B38 x 'Horizon'	right	320.874	-65.1682	-349.065	-596.526	161.239	-174.636	-319.135	-166.131	-452.123	-80.8718	-82.0617	321.938	-90.8068	365.794	347.582	394.282	165.874	-13.7629	297.622	15.0807
277	452059	V. rupestris B38 x 'Horizon'	right	403.642	-56.7694	-411.086	-555.028	179.367	-221.402	-290.245	-151.275	-437.092	-18.2162	-82.8469	234.395	-118.946	307.473	246.474	435.532	191.545	-22.3765	319.186	47.6673
278	452059	V. rupestris B38 x 'Horizon'	right	418.448	-107.991	-351.157	-485.834	153.749	-216.055	-343.323	-148.222	-408.382	-75.1328	-118.084	269.596	-123.696	339.698	281.768	448.517	152.806	-48.7457	337.871	24.1698
279	452059	V. rupestris B38 x 'Horizon'	right	374.458	-77.4227	-430.857	-489.818	145.947	-220.167	-272.097	-173.169	-374.54	-144.487	-110.593	298.423	-126.31	345.228	314.203	449.148	158.646	-30.0456	321.142	42.311
280	452059	V. rupestris B38 x 'Horizon'	right	425.441	-42.2234	-450.651	-431.642	194.298	-205.285	-309.398	-177.324	-410.304	-133.937	-108.27	254.34	-113.665	303.502	232.745	411.171	205.012	-33.3337	334.792	54.7316
281	452059	V. rupestris B38 x 'Horizon'	right	373.128	-86.9644	-336.447	-497.918	151.852	-180.544	-368.795	-164.212	-446.043	-103.926	-105.915	272.354	-102.353	352.534	315.507	424.402	176.689	-24.8851	342.379	9.15914
282	452059	V. rupestris B38 x 'Horizon'	right	399.35	-56.5327	-433.971	-450.574	191.611	-214.004	-328.515	-166.724	-378.596	-146.801	-110.245	269.75	-102.826	326.905	267.92	451.021	187.324	-46.5206	307.949	33.4809
283	452060	V. rupestris B38 x 'Horizon'	right	375.686	-37.2397	-368.447	-568.39	164.996	-203.57	-377.231	-158.687	-434.956	-114.398	-64.8552	303.999	-42.2219	338.42	301.174	389.447	144.752	-19.7319	301.104	70.1514
284	452060	V. rupestris B38 x 'Horizon'	right	382.773	-45.569	-420.915	-598.89	156.577	-211.56	-305.708	-159.711	-382.302	-73.4024	-78.0303	302.345	-84.9436	356.93	265.116	408.329	170.305	-22.5113	297.127	44.0408
285	452060	V. rupestris B38 x 'Horizon'	right	363	-28.7423	-419.805	-641.31	161.815	-201.342	-306.821	-141.08	-397.608	-89.1358	-59.2726	294.208	-58.4246	361.508	291.874	384.018	157.059	-4.30314	268.184	66.1792
286	452060	V. rupestris B38 x 'Horizon'	right	324.319	-60.2041	-419.103	-678.659	160.269	-199.438	-304.65	-102.809	-331.671	-55.874	-78.7927	293.608	-71.3347	348.45	285.921	422.529	157.291	-7.91906	277.752	40.3166
287	452060	V. rupestris B38 x 'Horizon'	right	375.343	-74.2011	-381.326	-597.906	151.829	-212.647	-326.597	-87.6825	-401.035	-55.1492	-109.034	264.062	-104.877	300.154	301.044	441.299	165.68	-22.3103	328.975	44.3816
288	452060	V. rupestris B38 x 'Horizon'	right	344.837	-64.4451	-312.852	-601.144	150.695	-221.726	-382.312	-135.306	-445.204	-75.3296	-41.1608	316.81	-52.6205	372.674	285.95	394.177	163.824	-27.673	288.843	41.9638
289	452061	V. rupestris B38 x 'Horizon'	right	352.775	-41.2247	-390.809	-554.321	152.155	-211.593	-332.345	-173.487	-425.401	-86.6301	-87.6843	296.351	-87.1679	346.611	289.97	416.62	221.15	-26.2869	307.357	33.9614
290	452061	V. rupestris B38 x 'Horizon'	right	376.64	-77.5626	-353.852	-528.483	137.646	-198.389	-363.011	-156.699	-435.57	-109.52	-88.595	284.818	-103.419	348.006	325.622	410.401	197.383	-28.6146	307.157	56.0419
291	452061	V. rupestris B38 x 'Horizon'	right	365.779	-43.9089	-353.397	-538.079	167.285	-184.547	-339.893	-186.32	-476.008	-60.9184	-99.9724	284.606	-102.234	321.152	332.947	399.764	184.902	-18.133	320.593	26.3844
292	452061	V. rupestris B38 x 'Horizon'	right	397.404	-109.171	-292.139	-519.473	152.405	-261.767	-359.643	-131.057	-415.604	-0.113628	-118.925	307.459	-123.739	342.018	240.528	421.747	193.311	-54.0427	326.402	4.4006
293	452061	V. rupestris B38 x 'Horizon'	right	321.094	-48.6733	-349.06	-617.761	145.946	-210.104	-356.96	-167.077	-442.957	-105.36	-33.3293	314.682	-25.148	377.58	313.475	379.588	158.969	3.11671	267.971	74.0088
294	452061	V. rupestris B38 x 'Horizon'	right	335.026	-83.319	-289.593	-567.297	122.979	-217.802	-357.842	-146.272	-438.748	-91.9495	-78.2901	343.638	-82.7867	393.129	330.147	402.334	166.21	-39.5072	292.896	7.04475
295	452062	V. rupestris B38 x 'Horizon'	right	318.61	-53.7786	-412.841	-542.276	152.047	-193.225	-299.539	-201.275	-384.278	-156.138	-84.7865	318.763	-92.5127	373.931	370.463	414.793	147.599	-13.9385	285.238	53.1426
296	452062	V. rupestris B38 x 'Horizon'	right	301.059	-85.4971	-315.857	-607.136	120.897	-210.687	-323.67	-155.826	-428.042	-114.239	-45.8538	361.755	-61.6428	410.287	338.309	394.1	152.256	-29.3193	262.544	36.5627
297	452062	V. rupestris B38 x 'Horizon'	right	303.799	-77.6737	-279.742	-597.908	150.429	-207.058	-372.21	-144.909	-474.726	-85.6157	-53.4426	333.274	-41.1354	380.02	337.323	384.596	160.035	-30.8636	269.67	46.1384
298	452062	V. rupestris B38 x 'Horizon'	right	290.311	-52.2579	-379.987	-631.057	152.91	-178.323	-309.583	-139.712	-438.631	-112.053	-51.7008	327.257	-61.8866	365.698	314.688	391.142	189.05	-4.18473	294.828	33.49
299	452062	V. rupestris B38 x 'Horizon'	right	284.022	-79.3167	-302.278	-670.176	130.346	-195.381	-327.832	-134.956	-425.24	-74.0071	-61.2002	356.307	-37.9258	409.667	337.68	352.606	149.349	-6.52224	253.078	41.7783
300	452062	V. rupestris B38 x 'Horizon'	right	306.671	-58.8325	-335.51	-640.758	122.45	-207.932	-326.057	-118.788	-416.516	-99.7506	-63.3525	334.714	-80.7783	371.472	369.367	387.124	160.766	-18.4493	262.959	51.2002
301	452063	V. rupestris B38 x 'Horizon'	right	335.452	-60.4734	-372.916	-642.969	152.238	-198.603	-319.937	-138.316	-385.9	-99.9252	-70.2665	323.235	-75.657	395.728	333.899	365.03	113.851	8.41694	289.236	47.8762
302	452063	V. rupestris B38 x 'Horizon'	right	354.281	-71.7706	-355.513	-559.761	151.424	-215.271	-337.557	-153.862	-414.806	-97.8419	-95.6454	309.373	-85.6497	349.333	340.652	439.823	140.781	-19.7104	302.035	19.6874
303	452063	V. rupestris B38 x 'Horizon'	right	334.116	-48.5563	-370.911	-636.52	167.401	-208.961	-327.592	-135.696	-389.815	-58.2305	-86.5348	308.297	-76.7967	354.219	333.741	416.145	132.51	-15.6788	283.88	24.9817
304	452063	V. rupestris B38 x 'Horizon'	right	355.612	-52.3782	-399.674	-586.874	149.729	-218.265	-315.763	-177.824	-378.189	-88.5796	-95.4765	311.438	-84.2141	361.003	319.242	414.582	141.608	5.97837	307.124	30.9187
305	452063	V. rupestris B38 x 'Horizon'	right	350.188	-83.9083	-282.844	-627.063	154.472	-207.457	-339.763	-71.2626	-434.552	-19.4544	-113.772	305.82	-108.894	354.982	314.03	386.947	135.242	2.40991	325.893	-41.0136
306	452063	V. rupestris B38 x 'Horizon'	right	347.199	-59.6296	-341.474	-582.007	136.469	-220.65	-348.959	-147.751	-411.092	-85.6411	-87.1234	305.613	-80.8107	350.848	342.568	432.007	126.653	-5.2512	316.57	12.4612
307	452065	V. rupestris B38 x 'Horizon'	right	357.235	-71.5217	-346.104	-557.877	135.318	-228.267	-335.752	-119.255	-424.963	-88.4753	-96.1874	304.847	-102.441	358.694	293.869	430.744	200.559	-30.9459	318.465	2.05686
308	452065	V. rupestris B38 x 'Horizon'	right	376.285	-54.7313	-358.093	-560.802	140.603	-241.589	-331.024	-134.918	-407.665	-93.9558	-92.2884	319.096	-111.656	375.445	304.671	398.609	168.854	-37.8203	310.315	30.6673
309	452065	V. rupestris B38 x 'Horizon'	right	335.357	-68.2241	-296.267	-632.858	135.249	-217.817	-357.065	-127.641	-445.144	-54.4381	-58.3129	327.247	-57.2946	377.509	318.88	385.619	146.384	-25.5012	278.213	36.1049
310	452065	V. rupestris B38 x 'Horizon'	right	372.058	-99.2208	-265.147	-534.26	146.565	-223.517	-369.021	-108.111	-449.48	-42.9339	-120.189	289.695	-118.3	354.1	321.705	420.016	148.017	-32.4278	333.791	-23.3415
311	452065	V. rupestris B38 x 'Horizon'	right	354.267	-13.4211	-353.942	-600.964	126.262	-209.191	-351.068	-143.593	-438.741	-85.1488	-78.1664	290.958	-83.5043	342.932	354.08	384.635	181.313	-19.9189	289.498	53.7124
312	452065	V. rupestris B38 x 'Horizon'	right	332.716	-82.2219	-259.035	-607.723	116.209	-234.785	-360.833	-137.444	-441.517	-35.0287	-66.3599	334.511	-76.8083	390.898	321.294	397.628	148.664	-31.5563	285.67	5.72056
313	452067	V. rupestris B38 x 'Horizon'	right	330.097	-61.9364	-360.227	-578.052	145.249	-208.152	-334.341	-159.177	-441.5	-108.254	-68.7855	321.733	-68.3925	362.707	312.117	410.015	176.84	-13.5435	308.942	34.6606
314	452067	V. rupestris B38 x 'Horizon'	right	329.851	-67.4961	-339.848	-612.244	148.038	-201.458	-358.613	-142.591	-418.448	-64.489	-84.084	312.091	-89.8345	362.841	327.459	387.62	177.509	-14.0469	307.971	39.7732
315	452067	V. rupestris B38 x 'Horizon'	right	321.901	-46.1382	-361.027	-618.92	160.237	-183.701	-345.159	-147.092	-440.527	-94.8964	-84.539	294.156	-44.3909	363.801	338.744	387.594	160.697	-3.25303	294.064	48.4494
316	452067	V. rupestris B38 x 'Horizon'	right	323.876	-70.6435	-336.941	-588.906	152.255	-205.11	-350.902	-162.683	-430.48	-111.702	-61.9744	345.862	-68.8626	394.789	322.126	375.065	167.835	-17.102	283.068	40.4302
317	452067	V. rupestris B38 x 'Horizon'	right	343.444	-42.6396	-360.811	-589.213	152.924	-189.953	-362.089	-171.437	-437.812	-111.199	-54.3577	310.266	-63.7354	375.923	319.104	367.048	162.223	-8.90239	301.11	60.1062
318	452067	V. rupestris B38 x 'Horizon'	right	307.445	-52.8349	-328.604	-645.759	137.493	-200.707	-357.099	-144.59	-426.658	-95.9681	-34.0648	346.938	-27.0741	386.338	307.932	374.708	158.171	-10.4588	262.458	42.3326
319	452068	V. rupestris B38 x 'Horizon'	right	293.907	-39.0247	-319.235	-628.321	145.052	-180.871	-345.734	-154.336	-470.303	-102.078	-31.9901	317.876	-47.3498	374.009	363.91	375.023	136.119	-1.47354	275.624	39.1956
320	452068	V. rupestris B38 x 'Horizon'	right	330.855	-49.0389	-343.078	-601.336	146.31	-213.991	-352.868	-144.093	-424.541	-100.222	-75.4938	328.043	-75.3932	368.615	339.729	383.19	156.176	-11.1545	298.306	39.9887
321	452068	V. rupestris B38 x 'Horizon'	right	332.055	-69.2581	-311.141	-621.959	155.485	-187.761	-352.141	-136.077	-450.912	-75.3887	-72.2641	326.936	-70.7063	387.816	334.247	361.377	146.023	-15.4789	289.353	29.7941
322	452068	V. rupestris B38 x 'Horizon'	right	336.148	-50.4161	-374.633	-581.429	172.634	-212.04	-315.149	-156.368	-428.43	-99.3013	-86.884	296.754	-106.283	381.602	351.239	380.921	144.697	-12.4855	306.662	52.762
323	452068	V. rupestris B38 x 'Horizon'	right	297.247	-44.7443	-275.846	-667.532	136.992	-207.833	-361.591	-149.87	-447.658	-79.5124	-9.95692	331.387	6.01825	395.177	346.264	339.338	62.7152	19.7761	245.815	63.8138
324	452068	V. rupestris B38 x 'Horizon'	right	284.962	-44.1221	-265.594	-643.4	115.941	-208.209	-373.783	-158.52	-464.452	-99.4918	-3.06988	338.984	21.2656	389.768	341.298	358.579	98.2784	3.17042	245.154	63.2425
325	452069	V. rupestris B38 x 'Horizon'	right	343.9	-54.0835	-322.482	-579.128	142.996	-183.968	-355.21	-141.42	-457.16	-88.1227	-92.925	309.076	-88.353	379.964	322.437	371.623	178.506	-18.574	328.291	4.63333
326	452069	V. rupestris B38 x 'Horizon'	right	343.344	-58.8268	-288.575	-571.09	144.512	-206.984	-384.881	-157.928	-456.985	-87.6594	-75.7656	321.735	-53.9271	373.966	333.673	386.556	126.164	-8.14429	312.44	8.37678
327	452069	V. rupestris B38 x 'Horizon'	right	372.072	-77.6629	-357.167	-560.245	192.489	-199.416	-333.017	-111.54	-431.591	-80.1458	-126.298	312.324	-108.576	355.959	280.306	381.014	171.693	-14.0706	340.09	-6.2157
328	452069	V. rupestris B38 x 'Horizon'	right	356.676	-28.2344	-388.164	-568.481	154.464	-214.515	-334.074	-161.365	-433.889	-115.107	-76.5164	303.875	-82.6277	359.803	311.345	381.416	185.409	-5.78085	307.379	48.3901
329	452069	V. rupestris B38 x 'Horizon'	right	372.751	-37.6901	-372.354	-564.492	162.025	-190.569	-357.22	-159.905	-446.341	-105.851	-82.0824	298.913	-73.1644	347.95	302.275	376.849	171.703	-2.40817	322.408	37.2037
330	452069	V. rupestris B38 x 'Horizon'	right	329.283	-55.6107	-312.462	-578.84	132.803	-188.936	-375.545	-161.62	-439.411	-104.466	-79.6755	331.015	-62.8623	383.305	334.555	382.519	168.677	-12.6411	304.638	5.2743
331	452070	V. rupestris B38 x 'Horizon'	right	375.108	-24.4565	-409.859	-597.532	129.244	-185.182	-328.789	-153.256	-393.074	-141.868	-58.6006	298.244	-79.1966	380.339	319.253	370.574	158.706	-3.0988	287.208	56.2358
332	452070	V. rupestris B38 x 'Horizon'	right	378.871	-56.9511	-354.448	-621.272	129.022	-221.425	-300.269	-137.324	-427.998	-48.4161	-92.5909	314.45	-86.8924	372.58	293.108	383.169	151	-5.38282	310.199	20.5722
333	452070	V. rupestris B38 x 'Horizon'	right	407.633	20.3873	-446.725	-588.87	177.636	-206.749	-327.919	-150.41	-394.76	-86.7033	-61.6236	269.312	-77.7933	312.778	266.417	383.423	160.304	-17.2103	296.833	64.0432
334	452070	V. rupestris B38 x 'Horizon'	right	405.792	-53.9184	-367.59	-573.806	117.587	-199.512	-342.289	-113.359	-425.447	-88.3811	-94.2133	271.054	-110.55	322.925	327.062	409.583	197.396	-28.1798	292.253	53.5953
335	452070	V. rupestris B38 x 'Horizon'	right	421.081	-25.5689	-407.038	-557.824	168.629	-208.638	-337.206	-135.382	-421.548	-89.0433	-84.6248	272.903	-98.6516	315.369	278.377	393.772	159.861	-14.1041	321.122	48.5167
336	452070	V. rupestris B38 x 'Horizon'	right	349.234	-43.6276	-367.437	-651.356	155.755	-174.544	-336.223	-135.423	-415.544	-76.0524	-55.4446	313.764	-56.6119	385.01	297.646	375.723	170.775	-23.5768	257.852	30.0818
337	452072	V. rupestris B38 x 'Horizon'	right	376.156	-21.7245	-455.717	-423.671	143.149	-216.929	-276.944	-223.64	-365.189	-193.741	-99.1478	274.262	-113.751	334.152	341.09	442.871	144.659	-23.4733	305.694	51.8945
338	452072	V. rupestris B38 x 'Horizon'	right	310.794	-73.7879	-302.081	-606.466	123.829	-213.642	-336.251	-118.663	-410.907	-104.842	-91.9608	313.774	-102.35	392.368	409.805	386.308	110.894	0.031049	288.228	24.9207
339	452072	V. rupestris B38 x 'Horizon'	right	290.479	-55.6045	-335.523	-585.611	119.65	-210.473	-312.696	-210.599	-416.857	-103.288	-77.7633	349.111	-75.4873	409.893	378.198	379.978	156.979	-14.5876	273.02	41.1809
340	452072	V. rupestris B38 x 'Horizon'	right	336.478	-62.0367	-375.269	-633.658	170.94	-203.651	-306.438	-109.724	-406.842	-80.6542	-87.8472	309.296	-103.584	377.073	326.722	383.331	155.144	-5.72475	290.697	25.7493
341	452072	V. rupestris B38 x 'Horizon'	right	245.223	-55.2284	-239.753	-598.663	105.788	-202.143	-336.497	-161.089	-450.719	-127.495	-57.7215	367.787	-53.88	430.014	427.229	337.53	117.139	-6.17599	243.191	15.4627
342	452072	V. rupestris B38 x 'Horizon'	right	341.533	-56.6122	-368.782	-568.724	153.922	-226.809	-319.767	-161.689	-413.871	-102.298	-95.4557	322.492	-92.4267	369.836	333.45	408.153	151.91	-9.66606	309.487	25.3164
343	452073	V. rupestris B38 x 'Horizon'	right	384.797	-42.692	-397.016	-601.954	212.67	-184.551	-343.276	-106.819	-430.834	-64.5821	-78.6943	285.505	-83.587	332.254	243.749	375.482	189.203	-26.2513	302.988	33.6082
344	452073	V. rupestris B38 x 'Horizon'	right	376.094	-64.9519	-367.937	-582.984	148.292	-185.654	-341.849	-118.678	-422.296	-96.6131	-92.2312	291.996	-108.862	361.062	304.937	391.929	189.796	-9.57463	314.056	13.4687
345	452073	V. rupestris B38 x 'Horizon'	right	402.502	-20.1466	-481.037	-529.626	208.976	-194.384	-312.923	-143.091	-375.357	-98.288	-100.378	248.091	-106.352	305.215	219.054	384.162	222.79	-19.6914	322.726	67.759
346	452073	V. rupestris B38 x 'Horizon'	right	384.202	-50.4544	-425.51	-577.025	191.782	-171.765	-324.77	-110.114	-402.805	-79.7636	-97.2971	274.567	-116.588	313.513	251.628	397.895	202.192	-14.1038	337.166	17.2505
347	452073	V. rupestris B38 x 'Horizon'	right	390.552	-55.195	-397.302	-449.682	181.287	-187.782	-341.036	-168.728	-444.079	-139.081	-80.2858	279.429	-87.0083	337.439	216.917	426.314	215.482	-39.7991	345.472	-2.91392
348	452073	V. rupestris B38 x 'Horizon'	right	426.095	-58.4392	-443.362	-526.106	187.227	-195.078	-306.613	-110.633	-370.153	-84.6846	-124.626	241.937	-137.427	310.864	239.178	405.974	162.204	-15.174	367.477	31.3388
349	452074	V. rupestris B38 x 'Horizon'	right	377.648	-22.7939	-437.875	-643.734	167.613	-176.873	-317.394	-129.345	-389.488	-95.2859	-48.866	291.842	-64.7053	337.217	271.789	374.407	168.063	-1.48851	273.215	66.0535
350	452074	V. rupestris B38 x 'Horizon'	right	367.71	-59.9434	-393.126	-538.127	152.261	-201.981	-311.291	-172.451	-394.22	-116.323	-105.16	306.51	-132.68	349.076	361.513	407.945	140.271	-9.45121	314.721	34.7461
351	452074	V. rupestris B38 x 'Horizon'	right	363.249	-45.7515	-377.963	-634.801	164.723	-201.971	-340.378	-115.803	-397.289	-76.6021	-84.5326	317.2	-80.9852	360.536	302.612	369.892	173.283	-21.4758	277.281	48.7763
352	452074	V. rupestris B38 x 'Horizon'	right	430.786	-43.6163	-421.346	-556.491	182.128	-215.124	-314.773	-135.148	-397.404	-97.5425	-85.7878	285.544	-107.304	329.407	274.468	397.375	130.483	-7.43578	308.749	43.0317
353	452074	V. rupestris B38 x 'Horizon'	right	308.403	-107.324	-228.881	-622.804	118.845	-238.798	-340.334	-101.679	-401.23	-28.2659	-93.9145	359.138	-102.446	411.38	358.639	388.328	120.433	-47.5042	260.487	-12.472
354	452074	V. rupestris B38 x 'Horizon'	right	381.271	-64.5976	-424.658	-614.599	183.99	-188.687	-311.315	-110.749	-379.179	-72.4688	-95.1374	278.409	-113.807	327.459	295.828	398.11	161.016	-11.3025	301.992	58.4246
355	452075	V. rupestris B38 x 'Horizon'	right	306.722	-59.3682	-273.701	-624.769	122.313	-217.386	-359.662	-171.078	-421.856	-74.6728	-69.2766	339.723	-47.4091	409.495	393.652	355.347	107.211	-9.17907	242.007	51.8893
356	452075	V. rupestris B38 x 'Horizon'	right	260.032	-59.5187	-218.345	-588.85	116.92	-213.213	-340.312	-149.779	-436.338	-89.1682	-93.1512	375.683	-95.3684	422.144	434.911	329.241	112.849	-7.79671	258.803	-18.7419
357	452075	V. rupestris B38 x 'Horizon'	right	309.704	-81.1474	-323.779	-593.498	132.937	-233.623	-310.743	-156.218	-405.252	-91.2119	-73.8678	349.785	-80.7666	410.114	339.31	423.815	139.477	-31.3925	272.981	3.37689
358	452075	V. rupestris B38 x 'Horizon'	right	276.119	-39.6698	-288.351	-654.964	133.083	-182.746	-358.911	-135.241	-438.36	-93.9689	-61.494	335.918	-40.3385	385.161	395.041	344.189	118.56	4.29931	264.652	37.022
359	452075	V. rupestris B38 x 'Horizon'	right	312.829	-74.5871	-339.103	-573.758	160.355	-233.237	-300.361	-173.555	-420.297	-78.3872	-87.6376	353.461	-86.6014	415.984	300.639	405.579	168.34	-30.0094	291.838	-11.4893
360	452075	V. rupestris B38 x 'Horizon'	right	328.015	-36.8544	-348.476	-595.876	146.746	-194.15	-362.163	-164.798	-436.69	-122.292	-52.5559	315.96	-54.2833	378.959	346.634	373.768	148.496	-14.7443	284.276	60.0281
361	452076	V. rupestris B38 x 'Horizon'	right	349.71	-59.2754	-388.792	-606.103	132.677	-215.084	-325.913	-135.864	-394.189	-93.3567	-67.512	300.972	-71.6391	347.041	303.503	439.434	167.253	-26.56	294.901	48.797
362	452076	V. rupestris B38 x 'Horizon'	right	375.986	-63.9279	-349.982	-649.169	152.319	-212.753	-335.413	-88.0581	-426.478	-20.0107	-65.9462	276.966	-94.0512	302.444	299.962	409.489	139.308	-2.12316	304.296	47.1439
363	452076	V. rupestris B38 x 'Horizon'	right	369.649	-66.6559	-357.309	-604.15	133.212	-232.832	-334.527	-133.984	-408.952	-70.8973	-80.5913	300.987	-65.5998	357.415	300.359	427.63	147.682	-19.1971	296.076	41.683
364	452076	V. rupestris B38 x 'Horizon'	right	393.226	-75.3747	-374.823	-539.864	124.483	-230.352	-317.619	-127.373	-431.716	-40.571	-79.4108	229.346	-108.667	269.838	278.044	485.811	166.36	-16.3153	350.123	44.8549
365	452076	V. rupestris B38 x 'Horizon'	right	370.465	-98.328	-294.797	-508.901	145.232	-239.476	-338.152	-147.591	-461.693	-94.1588	-90.1428	314.971	-93.113	385.181	303.102	426.531	138.976	-29.5352	320.122	-8.6939
366	452076	V. rupestris B38 x 'Horizon'	right	395.211	-61.697	-367.061	-593.917	147.303	-223.145	-331.569	-121.727	-412.923	-55.1024	-91.6813	287.24	-91.0515	344.57	274.836	413.749	150.974	-12.6013	325.963	22.6309
367	452077	V. rupestris B38 x 'Horizon'	right	345.566	-61.9089	-357.578	-638.406	185.349	-191.486	-334.531	-116.221	-445.201	-43.6278	-73.0974	291.418	-74.7994	343.506	298.587	393.812	167.306	-7.56869	288.399	30.4819
368	452077	V. rupestris B38 x 'Horizon'	right	314.595	-72.4037	-280.936	-623.935	144.194	-202.299	-361.072	-122.335	-459.541	-54.5934	-61.1235	299.127	-61.298	353.774	367.672	419.594	123.418	-12.1693	274.09	15.2411
369	452077	V. rupestris B38 x 'Horizon'	right	302.212	-51.9994	-303.818	-617.154	128.655	-218.403	-311.158	-157.849	-452.713	-104.489	-39.8525	351.478	-58.6115	419.049	358.177	374.291	122.568	-18.0889	254.541	23.1651
370	452077	V. rupestris B38 x 'Horizon'	right	325.763	-23.0136	-325.173	-633.775	120.81	-188.872	-334.426	-140.218	-449.213	-94.8961	-70.3132	318.618	-82.9243	399.938	363.997	314.687	162.384	-5.8796	289.095	53.41
371	452077	V. rupestris B38 x 'Horizon'	right	330.923	-29.1804	-374.887	-634.696	124.948	-208.26	-314.37	-159.996	-429.528	-72.7563	-56.5605	289.29	-60.2889	354.355	338.521	407.808	156.345	-8.58467	284.897	62.0206
372	452077	V. rupestris B38 x 'Horizon'	right	276.577	-37.7889	-302.669	-618.727	116.046	-168.229	-343.588	-170.009	-461.314	-123.962	-34.6675	335.393	-51.7113	400.128	390.668	354.478	150.301	-7.70622	260.358	36.4225
373	452079	V. rupestris B38 x 'Horizon'	right	353.633	-52.3356	-334.376	-569.243	140.769	-180.24	-361.369	-164.695	-466.822	-122.376	-51.9676	312.17	-57.54	371.039	331.5	389.73	161.897	-20.2869	284.275	36.2389
374	452079	V. rupestris B38 x 'Horizon'	right	345.249	-65.6619	-367.448	-604.966	135.061	-210.428	-313.352	-147.46	-415.378	-115.67	-84.7591	327.68	-69.6419	388.584	338.133	381.81	158.987	-16.6736	273.15	62.7858
375	452079	V. rupestris B38 x 'Horizon'	right	346.656	-28.9293	-385.974	-634.754	145.158	-186.742	-331.45	-142.14	-413.525	-90.827	-67.3429	289.7	-76.0963	345.639	353.285	385.696	149.285	0.791565	280.004	61.5656
376	452079	V. rupestris B38 x 'Horizon'	right	317.77	-72.24	-281.958	-606.498	128.968	-183.357	-330.021	-171.351	-509.538	-56.6172	-52.7787	320.836	-58.3019	371.782	349.211	375.525	153.429	-11.4055	283.219	33.3259
377	452079	V. rupestris B38 x 'Horizon'	right	376.65	-41.4628	-392.152	-566.935	157.297	-189.148	-297.348	-163.097	-455.96	-84.2612	-91.8463	274.634	-100.767	335.978	333.695	409.213	161.496	-15.536	308.936	40.617
378	452079	V. rupestris B38 x 'Horizon'	right	342.955	-55.905	-345.752	-610.518	151.508	-196.996	-316.121	-166.405	-466.449	-91.8432	-60.294	309.575	-68.217	380.909	353.773	361.121	135.142	0.368964	273.456	69.6934
379	452080	V. rupestris B38 x 'Horizon'	right	395.564	-73.6108	-382.359	-605.688	163.834	-207.422	-314.811	-110.669	-391.181	-32.6253	-105.792	291.935	-121.902	350.193	258.563	399.71	192.138	-23.2315	305.945	11.4095
380	452080	V. rupestris B38 x 'Horizon'	right	364.595	-61.2197	-382.131	-466.005	169.349	-190.583	-319.015	-177.479	-420.417	-146.645	-103.612	315.016	-143.629	372.316	308.803	402.962	203.597	-30.727	322.459	-17.6353
381	452080	V. rupestris B38 x 'Horizon'	right	359.822	-69.7066	-410.785	-551.204	182.812	-181.065	-300.412	-157.068	-401.429	-108.385	-93.0267	313.94	-114.039	372.949	273.71	410.312	181.966	-20.6532	321.382	-9.11957
382	452080	V. rupestris B38 x 'Horizon'	right	383.876	-39.8316	-450.849	-542.432	176.839	-188.872	-294.598	-126.509	-403.221	-106.632	-87.1988	267.943	-119.448	304.068	254.097	427.273	199.735	-24.0385	340.768	29.0314
383	452080	V. rupestris B38 x 'Horizon'	right	358.776	-49.8023	-378	-593.642	178.806	-186.525	-329.108	-110.482	-438.176	-76.8234	-83.2503	284.761	-109.88	340.166	297.751	404.362	186.445	-18.6738	316.636	6.65981
384	452080	V. rupestris B38 x 'Horizon'	right	384.579	-37.2766	-460.066	-601.956	194.95	-175.714	-298.728	-114.99	-377.475	-91.0403	-82.5932	269.28	-112.105	319.253	266.308	394.061	170.239	-8.32444	314.891	46.7056
385	452081	V. rupestris B38 x 'Horizon'	right	332.527	-57.9998	-355.848	-582.834	157.767	-202.163	-361.927	-159.693	-421.563	-105.516	-69.5405	319.018	-75.6156	352.863	337.953	401.146	150.724	-12.7741	305.524	47.9539
386	452081	V. rupestris B38 x 'Horizon'	right	312.683	-67.5973	-288.289	-577.453	160.54	-193.63	-384.046	-157.421	-485.551	-102.39	-46.5304	322.182	-42.9699	383.834	325.447	373.132	159.041	-9.02601	289.675	28.3696
387	452081	V. rupestris B38 x 'Horizon'	right	303.446	-57.0919	-336.715	-641.385	154.196	-204.036	-341.66	-142.681	-422.43	-82.5561	-46.6732	342.159	-46.4203	401.08	297.742	378.478	162.298	-23.0258	276.217	29.0591
388	452081	V. rupestris B38 x 'Horizon'	right	304.753	-67.3145	-313.605	-624.284	131.827	-214.399	-343.373	-159.907	-417.392	-96.3578	-63.3496	355.413	-41.5909	401.753	345.399	378.396	126.955	-16.7327	270.377	43.4329
389	452081	V. rupestris B38 x 'Horizon'	right	336.197	-71.8661	-355.172	-630.383	176.877	-200.549	-350.263	-145.828	-416.21	-85.0609	-64.6889	330.925	-54.4005	369.778	317.729	364.626	128.582	-5.72769	281.35	74.0865
390	452081	V. rupestris B38 x 'Horizon'	right	323.541	-73.2499	-283.856	-634.568	159.448	-210.275	-366.886	-120.12	-444.443	-56.3856	-73.9193	334.059	-68.6967	393.225	332.686	340.395	138.353	-18.4878	283.773	45.4072
391	452082	V. rupestris B38 x 'Horizon'	right	315.35	-57.3932	-289.713	-555.856	141.585	-226.752	-346.167	-158.069	-445.027	-131.501	-84.5193	362.472	-74.6842	418.295	360.91	354.491	131.137	-12.1587	291.129	6.47221
392	452082	V. rupestris B38 x 'Horizon'	right	309.237	-103.124	-270.286	-595.75	152.304	-228.395	-351.939	-111.442	-435.537	-59.8435	-97.5345	317.52	-92.0921	371.486	381.403	415.624	130.198	-26.8566	274.247	20.7803
393	452082	V. rupestris B38 x 'Horizon'	right	326.47	-58.9889	-340.635	-629.947	163.602	-206.851	-337.618	-130.485	-398.043	-94.1166	-89.9533	336.229	-91.2609	399.807	363.464	340.873	131.622	-9.25345	272.352	52.733
394	452082	V. rupestris B38 x 'Horizon'	right	317.319	-49.9348	-342.363	-622.752	144.615	-224.104	-346.405	-159.293	-410.59	-84.2291	-69.1269	328.18	-62.9453	384.556	344.642	379.364	148.637	-7.30084	276.216	55.514
395	452082	V. rupestris B38 x 'Horizon'	right	348.778	-55.8556	-383.609	-575.895	176.203	-216.684	-319.673	-140.264	-426.116	-118.343	-89.6057	309.916	-96.0986	361.335	339.719	385.025	152.696	-5.06981	297.705	55.8361
396	452082	V. rupestris B38 x 'Horizon'	right	319.671	-65.251	-294.022	-562.456	153.308	-217.74	-342.247	-160.648	-434.17	-75.4597	-111.066	323.541	-121.14	389.273	397.77	377.083	135.304	-13.1283	296.591	4.78696
397	452083	V. rupestris B38 x 'Horizon'	right	362.782	-68.7541	-396.364	-607.049	175.958	-182.782	-333.362	-116.245	-407.778	-90.5215	-83.7993	292.878	-91.43	319.924	318.844	418.158	170.744	-9.05775	284.406	43.4501
398	452083	V. rupestris B38 x 'Horizon'	right	356.483	-16.3136	-398.932	-645.405	170.172	-208.493	-318.191	-124.332	-398.042	-45.4862	-78.6287	295.821	-80.4117	316.907	313.521	406.739	152.782	-26.0245	281.247	46.5873
399	452083	V. rupestris B38 x 'Horizon'	right	338.047	-67.4414	-381.241	-665.593	154.847	-177.555	-301.289	-112.719	-383.818	-70.0929	-87.7937	327.619	-94.308	358.863	335.271	380.926	148.44	-6.10086	271.843	32.0942
400	452083	V. rupestris B38 x 'Horizon'	right	346.962	-48.7441	-429.613	-600.971	203.355	-196.771	-301.871	-132.895	-350.581	-75.0331	-120.312	291.443	-122.323	354.778	322.133	405.51	165.527	-24.0192	286.724	26.7026
401	452083	V. rupestris B38 x 'Horizon'	right	325.566	-29.7706	-366.136	-630.553	143.556	-211.131	-334.343	-131.72	-393.485	-101.458	-72.9084	327.238	-73.1663	391.275	330.391	378.64	162.497	-29.1069	278.029	36.5848
402	452083	V. rupestris B38 x 'Horizon'	right	322.7	-70.6415	-311.853	-624.773	192.83	-174.469	-367.343	-117.074	-432.572	-75.4741	-92.035	331.348	-79.7339	373.055	353.664	357.34	141.356	-10.4168	272.987	11.1042
403	452084	V. rupestris B38 x 'Horizon'	right	381.805	-79.0487	-344.017	-539.976	123.586	-228.08	-332.082	-154.106	-423.258	-111.141	-94.8314	314.561	-98.6058	368.218	333.164	414.342	147.683	-23.722	306.556	38.9525
404	452084	V. rupestris B38 x 'Horizon'	right	363.529	-55.7253	-353.202	-600.017	154.073	-216.683	-339.75	-135.962	-419.175	-86.9139	-86.6561	312.412	-78.5053	367.347	333.295	395.186	141.5	-28.4968	284.892	48.8542
405	452084	V. rupestris B38 x 'Horizon'	right	345.856	-56.9136	-303.877	-617.77	153.389	-214.76	-367.214	-133.971	-454.531	-61.6372	-64.4075	305.555	-64.0229	359.611	354.044	385.147	145.275	-14.3671	255.489	49.1052
406	452084	V. rupestris B38 x 'Horizon'	right	379.853	-34.8596	-398.031	-633.814	181.654	-189.42	-318.666	-75.9073	-398.185	-21.667	-111.168	261.815	-120.272	305.838	278.308	393.188	198.382	-27.5943	308.124	22.4212
407	452084	V. rupestris B38 x 'Horizon'	right	349.262	-69.8759	-347.976	-613.789	140.257	-190.976	-335.254	-122.867	-452.802	-89.6947	-52.1711	310.358	-65.2455	354.746	297.198	409.352	166.162	-17.7673	300.57	30.5139
408	452084	V. rupestris B38 x 'Horizon'	right	367.742	-40.2193	-374.524	-614.926	169.053	-207.672	-345.588	-124.087	-402.702	-54.3287	-76.9298	300.678	-78.3149	358.59	266.832	407.066	183.733	-42.3479	290.698	17.2464
409	452085	V. rupestris B38 x 'Horizon'	right	389.19	-56.4608	-371.592	-585.626	145.2	-215.777	-345.462	-145.181	-405.923	-76.4809	-86.9109	304.018	-94.3241	341.825	308.56	404.549	160.264	-10.4192	300.997	39.5521
410	452085	V. rupestris B38 x 'Horizon'	right	323.398	-32.2107	-348.25	-660.958	174.109	-203.418	-352.642	-134.716	-422.186	-69.2108	-47.6425	319.579	-32.7432	378.927	304.407	365.233	135.459	-6.35774	266.09	43.1321
411	452085	V. rupestris B38 x 'Horizon'	right	341.792	-62.6224	-299.76	-571.265	163.219	-207.63	-368.234	-158.543	-447.697	-102.966	-75.4806	346.878	-65.7136	393.703	340.218	371.233	133.898	-19.4037	277.758	10.6161
412	452085	V. rupestris B38 x 'Horizon'	right	340.536	-76.8488	-310.21	-578.526	126.902	-224.711	-353.904	-147.741	-434.774	-97.674	-77.6328	334.807	-78.5163	379.493	341.091	395.484	148.845	-18.7129	297.663	34.4297
413	452085	V. rupestris B38 x 'Horizon'	right	360.094	-69.0692	-313.693	-602.814	152.965	-219.745	-357.6	-128.764	-443.753	-66.7939	-78.1354	307.069	-83.9265	354.988	351.007	390.343	129.733	-11.6899	283.309	46.4751
414	452085	V. rupestris B38 x 'Horizon'	right	347.499	-80.3235	-327.208	-591.187	157.131	-216.655	-344.262	-123.49	-421.694	-83.6682	-95.3091	318.12	-100.971	364.715	356.862	401.153	139.483	-21.0454	288.469	32.3801
415	452087	V. rupestris B38 x 'Horizon'	right	356.569	-71.3243	-332.242	-606.701	136.867	-196.378	-368.832	-113.738	-437.798	-61.6739	-74.9649	285.814	-82.5697	331.129	310.41	410.942	169.61	-17.6968	322.949	39.6276
416	452087	V. rupestris B38 x 'Horizon'	right	335.934	-54.6146	-352.884	-624.59	150.419	-195.892	-313.832	-128.36	-422.79	-50.3356	-104.862	307.371	-93.406	357.377	335.169	407.164	165.634	-31.5613	300.62	13.4412
417	452087	V. rupestris B38 x 'Horizon'	right	293.11	-39.2291	-315.253	-659.97	137.472	-190.003	-354.897	-144.097	-443.413	-56.3254	-45.0361	310.127	-37.0611	366.101	345.3	393.249	152.645	-15.4446	267.133	35.591
418	452087	V. rupestris B38 x 'Horizon'	right	349.317	-71.8351	-376.031	-566.935	153.914	-216.838	-328.665	-136.636	-394.093	-80.0385	-101.512	299.733	-120.456	355.626	310.068	426.692	183.05	-35.6992	324.411	25.9301
419	452087	V. rupestris B38 x 'Horizon'	right	305.001	-58.2484	-326.804	-618.305	128.262	-190.572	-353.27	-153.511	-429.646	-94.0055	-56.8599	306.59	-52.2866	372.501	360.645	420.383	143.379	-8.28458	281.58	23.4521
420	452087	V. rupestris B38 x 'Horizon'	right	311.136	-70.7911	-330.472	-579.773	120.698	-219.146	-327.841	-143.125	-410.359	-114.634	-89.2054	333.215	-90.9611	379.963	367.975	422.319	150.873	-19.3392	298.157	11.3119
421	452089	V. rupestris B38 x 'Horizon'	right	370.433	-36.2622	-410.961	-519.965	163.76	-199.625	-304.123	-159.462	-422.453	-107.169	-109.647	272.423	-139.596	345.366	316.246	402.765	200.851	-23.906	335.489	25.8357
422	452089	V. rupestris B38 x 'Horizon'	right	356.433	-59.7166	-336.252	-511.426	159.138	-206.839	-336.046	-157.479	-460.657	-109.372	-100.912	301.946	-115.974	374.571	332.122	403.78	187.462	-37.7802	314.684	2.31597
423	452089	V. rupestris B38 x 'Horizon'	right	316.597	-53.0407	-346.727	-647.66	121.533	-181.74	-322.192	-108.539	-431.283	-116.999	-59.1952	326.267	-65.7937	372.932	353.692	379.193	166.386	-9.61721	266.984	39.2032
424	452089	V. rupestris B38 x 'Horizon'	right	308.589	-49.7802	-338.465	-662.331	145.622	-197.845	-333.74	-116.81	-421.051	-58.8036	-45.9882	304.419	-71.3567	370.839	327.604	407.475	146.135	-9.97288	282.651	12.8086
425	452089	V. rupestris B38 x 'Horizon'	right	337.855	-21.5884	-396.193	-603.559	145.4	-171.871	-307.816	-155.222	-430.702	-106.931	-95.4918	300.553	-84.8761	343.796	359.443	387.586	181.42	-7.56609	290.962	34.8013
426	452089	V. rupestris B38 x 'Horizon'	right	364.201	-11.894	-466.592	-547.092	165.284	-198.012	-293.993	-157.631	-387.379	-129.962	-84.3702	277.313	-109.903	329.708	277.727	401.573	216.218	-8.27455	318.806	44.2728
427	452091	V. rupestris B38 x 'Horizon'	right	371.169	-44.3853	-374.33	-567.618	158.889	-197.68	-357.615	-154.472	-430.905	-123.706	-76.0863	320.261	-62.238	349.964	302.281	376.765	151.371	-17.6315	317.465	58.5018
428	452091	V. rupestris B38 x 'Horizon'	right	324.06	-40.4247	-339.178	-612.582	130.53	-205.544	-361.598	-148.018	-449.866	-94.3683	-54.01	316.725	-52.2991	358.462	320.301	377.798	186.831	-10.8116	295.228	58.7635
429	452091	V. rupestris B38 x 'Horizon'	right	390.534	-52.9221	-390.859	-557.422	159.272	-215.147	-344.638	-142.688	-400.623	-88.8821	-89.0779	296.803	-104.485	352.919	267.274	396.004	182.48	-28.7548	330.124	40.0883
430	452091	V. rupestris B38 x 'Horizon'	right	391.807	-51.9422	-420.934	-548.361	149.698	-208.35	-338.606	-143.205	-413.854	-93.7322	-68.0596	253.165	-74.965	291.419	252.084	445.041	190.046	-8.27484	332.783	64.2399
431	452091	V. rupestris B38 x 'Horizon'	right	359.986	-0.757336	-420.081	-592.3	156.085	-194.257	-340.158	-160.958	-413.282	-141.623	-60.2838	297.243	-61.812	352.711	314.138	345.989	171.776	11.1376	293.633	82.8156
432	452091	V. rupestris B38 x 'Horizon'	right	366.795	-45.8208	-463.442	-451.036	166.87	-189.74	-308.262	-229.38	-333.664	-174.441	-110.288	293.735	-118.39	347.604	316.985	415.54	176.917	-20.5187	306.478	54.0567
433	452092	V. rupestris B38 x 'Horizon'	right	350.356	-90.3171	-333.012	-568.466	131.101	-241.933	-330.352	-128.666	-396.32	-93.214	-102.542	313.087	-94.3328	358.379	360.244	448.93	130.461	-30.5662	284.396	32.7664
434	452092	V. rupestris B38 x 'Horizon'	right	343.97	-70.8737	-337.138	-577.945	116.973	-253.849	-309.437	-185.216	-431.065	-37.4063	-66.2774	293.277	-54.8819	367.488	296.043	469.379	154.499	-39.9096	287.314	35.0558
435	452092	V. rupestris B38 x 'Horizon'	right	371.374	-71.3683	-369.213	-581.994	156.123	-236.691	-323.9	-177.587	-400.914	-41.6678	-84.0844	307.762	-77.2498	374.612	263.68	420.859	158.596	-26.0328	305.589	32.1077
436	452092	V. rupestris B38 x 'Horizon'	right	344.616	-50.9769	-345.888	-586.872	129.231	-230.621	-327.729	-189.455	-430.9	-26.2348	-87.6015	282.265	-89.6274	333.271	344.615	432.463	153.613	-7.13339	309.671	43.2946
437	452092	V. rupestris B38 x 'Horizon'	right	368.604	-57.5447	-426.95	-567.678	166.631	-226.838	-282.045	-158.931	-385.171	-93.0219	-80.4812	301.662	-101.572	357.982	279.622	438.093	167.763	-25.6591	293.6	31.9366
438	452092	V. rupestris B38 x 'Horizon'	right	325.379	-64.5829	-328.975	-671.033	157.509	-227.11	-344.639	-107.374	-417.042	-24.3963	-32.5611	305.048	-40.4484	334.171	292.885	432.63	124.77	-19.4738	263.123	42.1224
439	452093	V. rupestris B38 x 'Horizon'	right	304.863	-48.963	-271.895	-643.957	138.413	-199.126	-380.015	-124.671	-459.484	-43.7802	-63.2414	326.678	-68.2991	361.072	357.607	345.991	166.506	-17.9519	275.546	44.7081
440	452093	V. rupestris B38 x 'Horizon'	right	358.941	-49.5431	-391.365	-675.999	173.726	-207.396	-319.45	-87.2345	-374.021	-30.4957	-81.9114	266.056	-90.2754	326.667	319.908	396.625	130.642	-10.1004	273.806	71.4207
441	452093	V. rupestris B38 x 'Horizon'	right	334.364	-26.9522	-409.893	-597.407	154.314	-195.563	-337.585	-162.41	-406.182	-110.602	-70.0438	289.181	-71.5514	321.264	342.979	408.143	162.253	3.91483	301.345	70.4298
442	452093	V. rupestris B38 x 'Horizon'	right	331.23	-46.7736	-366.363	-556.185	173.477	-193.606	-351.711	-185.212	-441.607	-150.305	-56.3168	334.866	-56.4388	381.721	334.077	359.31	149.592	-17.9621	284.06	74.1456
443	452093	V. rupestris B38 x 'Horizon'	right	331.525	-49.7725	-367.096	-602.474	138.44	-215.313	-334.883	-161.579	-420.459	-118.207	-61.5764	328.701	-55.5844	370.898	332.35	389.941	153.013	-3.2435	284.272	61.05
444	452093	V. rupestris B38 x 'Horizon'	right	368.247	-49.871	-412.858	-517.418	196.68	-221.629	-347.299	-185.192	-410.207	-123.574	-71.381	310.779	-63.1937	332.743	269.128	420.335	176.199	-31.6654	294.684	65.4921
445	452094	V. rupestris B38 x 'Horizon'	right	317.59	-39.1671	-316.898	-575.695	156.614	-204.024	-347.594	-151.658	-445.496	-138.663	-64.8736	347.264	-52.8146	415.018	343.829	375.014	140.068	-25.5661	269.576	-2.52279
446	452094	V. rupestris B38 x 'Horizon'	right	319.493	-89.8787	-343.088	-629.444	154.064	-208.915	-333.824	-102.593	-389.057	-63.5031	-95.1955	324.243	-100.164	368.923	315.852	410.659	171.299	-18.1553	300.62	8.66351
447	452094	V. rupestris B38 x 'Horizon'	right	383.71	-34.092	-420.723	-541.772	178.496	-185.822	-335.826	-136.818	-399.3	-70.0679	-109.399	254.121	-111.525	285.389	277.982	441.407	192.227	-33.271	344.358	20.9249
448	452094	V. rupestris B38 x 'Horizon'	right	350.457	-73.1915	-384.385	-563.688	195.5	-204.129	-319.581	-129.136	-372.118	-60.3063	-145.754	306.115	-139.063	355.294	312.061	406.679	183.382	-37.5573	319.501	-0.0797868
449	452094	V. rupestris B38 x 'Horizon'	right	277.691	-61.6277	-251.012	-676.374	133.295	-194.19	-347.852	-112.45	-433.244	-62.948	-53.3066	353.752	-40.0624	416.067	368.184	340.344	113.313	-11.9409	232.995	9.36742
450	452094	V. rupestris B38 x 'Horizon'	right	348.58	-55.9719	-351.881	-566.02	170.036	-196.828	-337.392	-152.881	-401.462	-92.947	-120.276	331.494	-118.512	379.732	348.377	378.759	152.89	-22.1873	309.641	-3.14902
451	452095	V. rupestris B38 x 'Horizon'	right	363.027	-69.0165	-330.929	-544.911	125.627	-222.969	-336.039	-164.204	-450.703	-102.249	-89.8908	312.448	-84.8881	375.838	325.006	405.441	162.958	-12.5744	315.831	22.1975
452	452009	V. rupestris B38 x 'Horizon'	right	326.145	-74.8706	-301.496	-619.686	136.861	-220.914	-344.543	-126.479	-417.722	-57.7944	-90.295	318.366	-88.0155	385.523	358.702	396.738	129.209	-25.7766	291.155	24.8938
453	452095	V. rupestris B38 x 'Horizon'	right	359.371	-58.4239	-353.227	-593.599	149.582	-221.734	-346.115	-154.688	-416.105	-91.0006	-73.7732	327.452	-74.1631	372.837	314.124	391.922	149.474	-9.11107	290.833	36.3461
454	452095	V. rupestris B38 x 'Horizon'	right	382.611	-83.2901	-365.834	-503.096	76.6267	-261.691	-316.397	-155.1	-380.301	-127.884	-87.2017	291.37	-101.721	355.438	306.687	464.031	150.669	-36.4205	334.861	56.643
455	452095	V. rupestris B38 x 'Horizon'	right	373.752	-76.5351	-323.186	-551.564	135.829	-211.316	-346.793	-127.907	-449.865	-51.9986	-94.9267	283.644	-122.474	310.997	327.161	438.237	167.03	-21.4434	333.474	7.88622
456	452095	V. rupestris B38 x 'Horizon'	right	344.451	-70.0043	-353.706	-601.445	132.801	-213.43	-340.511	-127.541	-381.05	-99.2119	-90.8427	311.034	-103.201	361.729	369.052	417.069	140.317	-14.5536	282.689	36.3536
457	452096	V. rupestris B38 x 'Horizon'	right	367.721	-60.5405	-341.4	-568.369	156.442	-229.525	-342.086	-147.019	-442.825	-81.8725	-70.8018	312.667	-80.9222	363.845	304.455	417.423	155.619	-32.7788	293.799	26.1696
458	452096	V. rupestris B38 x 'Horizon'	right	364.738	-86.8033	-317.637	-540.307	171.9	-219.055	-349.292	-126.914	-447.835	-71.4431	-106.644	300.43	-116.451	352.424	322.015	415.552	153.16	-24.388	326.046	0.503338
459	452096	V. rupestris B38 x 'Horizon'	right	343.677	-88.5141	-303.627	-578.939	146.154	-233.157	-365.538	-154.035	-431.177	-83.8698	-75.9175	329.393	-72.3141	382.852	337.865	391.126	132.476	-15.759	288.402	50.903
460	452096	V. rupestris B38 x 'Horizon'	right	317.148	-53.8647	-317.506	-645.057	154.432	-215.903	-353.283	-127.531	-446.622	-67.2347	-45.729	315.289	-54.1197	371.026	332.611	378.44	138.628	-3.91372	274.44	48.749
461	452096	V. rupestris B38 x 'Horizon'	right	333.223	-78.3041	-295.452	-566.394	142.332	-236.275	-349.619	-153.164	-442.266	-77.8405	-82.2557	327.788	-90.8514	385.435	348.359	405.272	139.527	-25.7691	297.002	19.2514
462	452096	V. rupestris B38 x 'Horizon'	right	295.259	-59.9238	-264.2	-617.267	140.039	-228.109	-366.405	-162.206	-448.514	-83.0248	-36.1352	355.637	-30.5902	413.85	346.255	359.365	111.516	-18.2099	252.776	39.8886
463	452097	V. rupestris B38 x 'Horizon'	right	311.063	-66.4295	-324.338	-640.372	149.068	-185.515	-324.273	-143.008	-461.113	-81.4382	-54.0326	325.294	-57.1754	396.677	339.241	363.623	165.737	-17.0129	255.824	48.1821
464	452097	V. rupestris B38 x 'Horizon'	right	331.461	-58.1128	-341.362	-645.823	123.885	-185.423	-343.076	-144.392	-433.522	-79.1567	-49.4374	309.01	-59.5931	373.237	331.734	377.62	152.91	-3.1156	287.001	56.1569
465	452097	V. rupestris B38 x 'Horizon'	right	361.71	-29.6375	-440.187	-622.2	182.322	-185.632	-290.139	-124.127	-415.93	-70.8345	-71.2338	270.32	-83.3154	320.759	270.652	408.726	194.019	-17.9408	292.102	50.5679
466	452097	V. rupestris B38 x 'Horizon'	right	341.855	-42.3433	-389.311	-600.995	144.731	-204.212	-324.44	-154.851	-417.058	-109.09	-69.4497	306.827	-73.5375	356.858	330.508	401.129	162.304	-13.166	294.399	59.8426
467	452097	V. rupestris B38 x 'Horizon'	right	348.219	-69.286	-347.536	-537.562	148.49	-211.674	-336.444	-176.291	-425.839	-100.28	-109.989	312.515	-91.2532	335.366	371.982	432.637	135.263	-12.7068	307.107	27.281
468	452097	V. rupestris B38 x 'Horizon'	right	333.933	-30.7792	-368.062	-636.074	178.803	-200.668	-334.683	-131.93	-409.216	-64.2774	-96.4831	312.845	-96.1617	368.778	343.29	347.368	170.924	-17.8345	277.656	52.5739
469	452098	V. rupestris B38 x 'Horizon'	right	360.334	-14.7564	-413.302	-643.603	191.024	-204.286	-326.47	-134.454	-410.464	-52.6522	-36.7354	292.134	-57.6366	343.776	218.781	364.695	151.668	9.77608	322.801	39.3707
470	452098	V. rupestris B38 x 'Horizon'	right	335.478	-56.9699	-416.347	-602.182	189	-183.625	-289.632	-125.101	-377.43	-91.7136	-105.392	304.139	-123.9	358.154	317.717	407.659	151.787	-5.74882	318.719	-4.61117
471	452098	V. rupestris B38 x 'Horizon'	right	303.409	-78.3454	-326.399	-652.802	149.379	-162.022	-320.542	-124.388	-428.142	-84.3611	-57.8652	326.379	-70.8655	387.495	351.85	394.922	119.189	-4.18723	279.985	-2.68999
472	452098	V. rupestris B38 x 'Horizon'	right	342.166	-77.5485	-371	-623.508	159.985	-210.046	-311.824	-119.757	-387.833	-38.1732	-89.1552	294.254	-107.755	345.302	310.492	444.915	157.148	-26.0655	297.777	10.6267
473	452098	V. rupestris B38 x 'Horizon'	right	319.224	-70.3063	-286.845	-648.377	132.498	-196.439	-350.997	-88.5094	-441.627	-70.2901	-60.2268	318.749	-65.4606	391.862	326.311	388.231	145.278	-16.5562	281.847	-8.3636
474	452098	V. rupestris B38 x 'Horizon'	right	303.309	-69.9872	-308.145	-655.001	139.51	-183.205	-329.692	-118.162	-414.746	-63.0297	-78.2391	314.712	-89.8003	391.569	376.398	385.394	122.966	3.05294	278.44	-5.34329
475	452099	V. rupestris B38 x 'Horizon'	right	304.649	-35.4168	-329.746	-647.216	146.223	-178.829	-358.73	-141.053	-450.058	-91.6953	-46.5694	325.534	-42.8716	354.088	354.857	365.957	155.866	2.26209	266.38	46.3699
476	452099	V. rupestris B38 x 'Horizon'	right	361.736	-25.391	-459.615	-564.184	193.653	-185.291	-310.393	-166.685	-375.858	-149.092	-84.7238	307.505	-83.3503	341.189	303.645	379.913	157.885	3.68422	297.021	58.3538
477	452099	V. rupestris B38 x 'Horizon'	right	294.229	-57.2574	-347.596	-636.156	133.563	-199.387	-347.659	-155.174	-417.074	-108.138	-34.1276	339.069	-33.1679	378.846	324.883	395.287	168.419	-15.6216	258.531	58.5331
478	452099	V. rupestris B38 x 'Horizon'	right	273.009	-47.4522	-361.37	-584.214	152.767	-179.916	-332.117	-185.304	-399.554	-157.57	-54.8045	343.119	-70.5221	404.965	381.037	386.366	141.467	0.683854	270.087	19.323
479	452099	V. rupestris B38 x 'Horizon'	right	314.097	-74.4722	-347.415	-573.217	144.695	-198.659	-332.106	-155.863	-406.472	-142.239	-85.0691	340.862	-83.9557	390.381	374.692	398.864	142.277	-15.447	279.258	29.7907
480	452099	V. rupestris B38 x 'Horizon'	right	298.174	-60.24	-328.851	-596.412	152.259	-194.37	-331.217	-188.325	-416.924	-114.785	-64.1529	344.228	-74.8813	412.398	387.47	367.927	111.688	-8.00738	266.435	37.5865
481	452100	V. rupestris B38 x 'Horizon'	right	351.512	-46.0733	-362.804	-606.133	166.394	-216.365	-345.696	-145.51	-398.576	-85.539	-85.4599	333.682	-82.2865	365.812	324.491	378.355	132.827	-22.4465	299.599	44.217
482	452100	V. rupestris B38 x 'Horizon'	right	301.841	-65.486	-309.318	-587.9	125.85	-229.591	-352.098	-166.467	-408.692	-109.69	-79.1667	354.603	-62.0971	394.255	370.606	395.448	145.087	-17.9953	267.988	32.8239
483	452100	V. rupestris B38 x 'Horizon'	right	286.975	-59.2347	-269.299	-570.671	97.386	-211.121	-367.864	-177.259	-442.961	-141.681	-48.9475	369.059	-22.953	421.693	353.814	373.361	152.027	-29.1008	261.822	24.9544
484	452100	V. rupestris B38 x 'Horizon'	right	314.294	-40.0194	-334.849	-662.328	136.012	-202.415	-364.756	-128.041	-414.672	-66.2926	-54.8235	321.692	-51.7488	367.718	318.371	362.361	164.36	-7.19995	287.811	54.5254
485	452100	V. rupestris B38 x 'Horizon'	right	277.544	-50.8138	-316.219	-575.39	105.856	-204.067	-317.549	-219.124	-421.517	-130.88	-74.6505	382.769	-44.7371	414.559	377.12	367.999	144.901	-13.2297	269.252	28.1767
486	452100	V. rupestris B38 x 'Horizon'	right	305.235	-49.7678	-282.965	-588.337	125.815	-217.626	-363.677	-173.094	-445.861	-124.823	-48.2218	358.78	-28.066	403.377	368.38	369.297	113.547	-17.2845	255.813	39.4794
487	452102	V. rupestris B38 x 'Horizon'	right	376.766	-64.3387	-343.735	-555.548	168.084	-209.877	-389.854	-161.916	-473.83	-73.8516	-55.97	285.247	-11.9865	299.003	250.465	420.004	179.635	4.02718	300.426	57.251
488	452102	V. rupestris B38 x 'Horizon'	right	395.54	-42.7451	-376.066	-561.389	160.331	-197.462	-363.373	-151.734	-432.19	-73.9814	-96.4351	281.201	-78.1748	328.32	284.279	398.204	197.302	-24.5182	308.786	44.1053
489	452102	V. rupestris B38 x 'Horizon'	right	397.321	-17.1595	-393.964	-552.015	177.206	-209.018	-349.478	-130.562	-434.784	-34.3915	-101.723	243.865	-110.554	289.941	247.479	393.588	212.251	-20.7831	356.246	36.536
490	452102	V. rupestris B38 x 'Horizon'	right	399.486	-46.5285	-382.849	-500.745	144.044	-205.313	-318.465	-207.246	-444.199	-55.6276	-110.615	257.26	-113.241	315.456	298.499	422.676	170.603	-9.78159	356.735	29.8489
491	452102	V. rupestris B38 x 'Horizon'	right	403.416	-18.9753	-408.133	-553.215	151.127	-192.983	-337.323	-159.893	-425.453	-100.943	-95.9482	280.638	-90.7296	329.033	289.781	380.039	187.895	-10.9111	325.368	47.2104
492	452102	V. rupestris B38 x 'Horizon'	right	382.04	-32.4322	-343.635	-577.782	114.902	-207.974	-348.522	-128.145	-450.816	-86.7846	-97.6642	281.502	-96.3928	333.633	344.144	384.769	178.002	-11.0915	317.942	44.3063
493	452103	V. rupestris B38 x 'Horizon'	right	313.717	-68.6975	-281.55	-634.574	137.645	-226.593	-336.085	-140.851	-433.1	-28.4096	-72.9166	331.794	-69.721	394.17	332.223	398.765	125.644	-17.1199	284.144	-8.48442
494	452103	V. rupestris B38 x 'Horizon'	right	286.176	-100.746	-194.339	-525.398	85.5592	-206.453	-377.794	-200.282	-490.002	-107.603	-44.7779	351.831	-29.5382	402.938	378.881	389.603	112.413	-11.1167	273.423	7.22641
495	452103	V. rupestris B38 x 'Horizon'	right	333.028	-34.4866	-340.563	-602.818	117.321	-191.28	-334.429	-192.856	-429.042	-54.7554	-75.6295	281.668	-99.3556	367.035	384.482	396.467	146.728	-8.36281	297.462	39.3885
496	452103	V. rupestris B38 x 'Horizon'	right	304.516	-69.759	-305.871	-585.682	135.978	-202.092	-340.957	-190.895	-443.902	-78.5852	-74.2543	328.978	-79.0713	402.539	365.455	386.973	151.973	-11.8617	286.134	20.3842
497	452103	V. rupestris B38 x 'Horizon'	right	330.194	-56.9814	-343.596	-626.18	152.121	-213.064	-359.041	-121.904	-425.751	-71.8067	-57.9815	298.285	-71.3855	357.619	311.014	403.73	158.74	-3.57469	305.686	33.8759
498	452103	V. rupestris B38 x 'Horizon'	right	366.121	-6.08539	-390.846	-569.458	149.335	-214.185	-338.953	-162.235	-412.02	-104.126	-87.5904	290.326	-86.7853	364.832	312.21	385.085	157.216	-15.2917	331.313	31.1387
499	452104	V. rupestris B38 x 'Horizon'	right	374.565	-58.6402	-366.007	-530.088	158.808	-212.558	-345.876	-156.359	-432.152	-102.968	-99.2121	298.32	-96.8453	334.162	325.29	427.147	176.307	-30.2133	305.122	31.1978
500	452104	V. rupestris B38 x 'Horizon'	right	324.227	-42.2044	-348.58	-628.103	146.571	-180.771	-347.531	-135.466	-457.552	-88.8652	-50.4899	308.278	-59.9226	358.665	316.378	381.17	188.951	-5.34666	287.95	32.6433
501	452104	V. rupestris B38 x 'Horizon'	right	363.077	-35.7584	-416.871	-594.162	166.122	-179.941	-317.805	-139.198	-426.935	-112.288	-70.021	277.929	-87.3419	357.871	290.629	381.746	186.283	-0.619871	312.863	44.4209
502	452104	V. rupestris B38 x 'Horizon'	right	361.081	-36.1766	-438.395	-487.14	141.729	-196.611	-302.055	-203.961	-392.56	-180.491	-85.9669	294.058	-98.0853	353.969	330.345	418.449	187.279	-13.9831	296.629	51.8877
503	452104	V. rupestris B38 x 'Horizon'	right	307.568	-35.124	-352.683	-629.164	142.126	-176.905	-361.208	-156.674	-433.181	-116.737	-28.9275	316.282	-42.5576	377.772	333.817	378.338	168.806	-4.98635	266.24	47.1985
504	452104	V. rupestris B38 x 'Horizon'	right	331.708	-46.3159	-332.045	-628.711	125.183	-204.75	-352.105	-128.749	-434.912	-73.9483	-71.6355	309.894	-71.4177	359.563	336.404	390.358	183.652	-10.302	285.168	32.962
505	452105	V. rupestris B38 x 'Horizon'	right	352.897	-60.0653	-429.449	-571.707	177.554	-233.456	-298.813	-146.335	-364.535	-78.8896	-96.8443	282.474	-113.741	335.637	295.635	445.092	166.194	-12.4312	311.103	39.6808
506	452105	V. rupestris B38 x 'Horizon'	right	288.668	-21.7653	-413.624	-643.392	160.414	-168.521	-313.889	-181.189	-378.663	-115.489	-53.5521	316.205	-58.4003	369.831	358.837	380.52	144.159	11.2838	266.051	52.5161
507	452105	V. rupestris B38 x 'Horizon'	right	280.805	-36.1083	-366.267	-591.431	125.052	-193.768	-313.946	-207.436	-402.774	-145.895	-58.5741	350.712	-48.7336	404.348	374.409	383.209	146.1	-10.6659	263.927	47.0345
508	452105	V. rupestris B38 x 'Horizon'	right	306.307	-40.6292	-299.217	-578.476	139.596	-206.585	-304.023	-141.894	-386.608	-73.8158	-146.538	306.017	-146.001	356.551	488.384	369.532	56.2817	2.01279	291.82	7.28757
509	452105	V. rupestris B38 x 'Horizon'	right	303.135	-50.3011	-337.354	-621.372	131.834	-212.679	-340.394	-154.38	-426.019	-93.0966	-50.3361	326.416	-54.8212	374.399	342.395	411.031	147.529	-15.2841	284.031	35.2683
510	452105	V. rupestris B38 x 'Horizon'	right	260.207	-64.5684	-270.883	-625.253	122.571	-197.14	-364.552	-147.966	-439	-114.034	-43.6153	350.333	-31.3954	401.411	387.324	374.793	133.594	-9.63674	245.75	32.0602
511	452106	V. rupestris B38 x 'Horizon'	right	367.084	-49.3512	-404.42	-599.374	152.203	-221.804	-324.703	-146.98	-385.463	-101.499	-68.7054	304.821	-69.1562	365.663	286.843	412.829	155.826	-17.8579	290.492	53.5525
512	452106	V. rupestris B38 x 'Horizon'	right	332.756	-52.5322	-377.354	-553.036	152.579	-182.891	-335.917	-179.891	-416.911	-130.218	-89.7256	300.585	-91.7361	358.045	372.614	412.488	150.712	-3.08095	302.983	30.5305
513	452106	V. rupestris B38 x 'Horizon'	right	340.87	-50.0535	-403.846	-570.756	148.73	-210.949	-321.2	-174.166	-395.209	-123.807	-76.0171	317.717	-74.5147	367.645	308.196	414.182	166.906	-13.7409	306.085	43.9284
514	452106	V. rupestris B38 x 'Horizon'	right	305.395	-74.8665	-317.705	-597.671	106.889	-202.175	-317.271	-175.005	-421.185	-97.2674	-78.6902	333.102	-81.8799	379.164	395.07	411.357	119.272	6.6008	290.104	16.7612
515	452106	V. rupestris B38 x 'Horizon'	right	328.647	-39.8187	-384.017	-623.667	143.951	-207.05	-345.985	-145.328	-386.707	-104.835	-61.0492	316.651	-55.2405	360.158	309.025	407.47	148.218	4.56665	303.159	31.8529
516	452106	V. rupestris B38 x 'Horizon'	right	335.091	-51.5126	-383.517	-586.366	118.464	-230.776	-286.868	-164.596	-401.238	-111	-84.8016	328.288	-81.4568	392.489	316.126	412.331	165.147	-14.3335	303.052	25.4753
517	452107	V. rupestris B38 x 'Horizon'	right	378.199	-32.4881	-473.29	-536.825	177.971	-170.135	-319.707	-145.815	-356.778	-128.824	-88.8496	257.198	-104.869	314.526	253.705	425.737	190.991	-15.8932	342.629	32.5188
518	452107	V. rupestris B38 x 'Horizon'	right	385.371	-32.723	-472.489	-522.091	168.023	-189.882	-274.233	-139.865	-343.64	-99.5965	-138.299	250.069	-152.639	289.313	304.858	438.259	181.78	-14.7969	341.268	21.3138
519	452107	V. rupestris B38 x 'Horizon'	right	384.489	-46.8737	-418.364	-485.056	180.385	-209.696	-332.366	-149.428	-388.549	-140.671	-113.568	299.78	-120.277	337.788	272.528	408.504	194.293	-36.412	341.429	22.0646
520	452107	V. rupestris B38 x 'Horizon'	right	359.1	-30.7274	-431.111	-636.388	185.421	-177.557	-322.962	-100.757	-375.728	-76.4544	-76.2895	289.747	-101.765	325.388	265.81	382.098	177.011	-3.26211	320.513	27.9126
521	452107	V. rupestris B38 x 'Horizon'	right	327.887	-54.7769	-361.425	-688.036	152.4	-160.616	-325.171	-92.2973	-415.835	-42.385	-74.1184	319.502	-68.8736	337.001	292.244	369.6	176.523	-18.9459	296.369	30.9536
522	452107	V. rupestris B38 x 'Horizon'	right	328.057	-34.9367	-421.772	-683.973	148.889	-177.321	-297.628	-100.329	-351.912	-57.1012	-84.764	288.074	-90.292	336.83	309.155	398.488	170.571	-3.9647	289.697	34.2335
523	453001	V. rupestris B38 x 'Horizon'	right	393.389	-43.5985	-375.802	-622.743	173.279	-217.76	-345.296	-109.652	-429.336	-30.7927	-66.3618	290.096	-60.1568	323.975	215.838	385.041	197.029	-16.3892	297.419	41.8223
524	453001	V. rupestris B38 x 'Horizon'	right	424.655	-17.1244	-424.735	-566.375	162.832	-215.208	-304.929	-119.171	-421.603	-67.6241	-76.9788	248.075	-108.315	312.201	245.452	407.314	172.815	-27.2077	330.808	45.1201
525	453001	V. rupestris B38 x 'Horizon'	right	407.145	-54.693	-371.715	-570.14	167.704	-198.584	-345.279	-131.095	-445.443	-63.7314	-85.9349	285.311	-84.9387	324.644	253.848	389.973	160.395	-16.0303	344.218	34.345
526	453001	V. rupestris B38 x 'Horizon'	right	387.183	-42.6066	-386.958	-584.483	170.836	-191.127	-325.86	-125.682	-448.19	-69.8683	-91.545	268.08	-100.994	328.448	293.705	392.709	177.68	-8.41163	324.143	32.9434
527	453001	V. rupestris B38 x 'Horizon'	right	399.406	-73.1239	-371.043	-606.232	162.907	-214.167	-316.556	-100.051	-416.11	-39.6898	-95.4034	280.812	-106.907	347.437	258.072	399.122	157.934	-18.381	327.7	24.2745
528	453001	V. rupestris B38 x 'Horizon'	right	394.207	-44.0906	-425.722	-566.497	167.576	-204.686	-328.777	-160.923	-382.309	-85.38	-85.8627	294.663	-90.486	342.408	250.012	399.4	175.486	-25.7425	325.875	50.8476
529	453002	V. rupestris B38 x 'Horizon'	right	346.898	-59.0907	-342.88	-631.156	176.567	-187.728	-354.977	-107.774	-428.819	-70.4759	-88.9114	312.338	-86.8183	360.394	324.252	358.719	158.316	-10.5741	296.372	35.3467
530	453002	V. rupestris B38 x 'Horizon'	right	380.188	-19.5915	-384.517	-594.824	155.902	-188.194	-363.168	-141.406	-445.353	-95.3335	-57.0909	276.587	-57.6018	325.058	289.841	385.709	173.089	-1.67498	308.712	53.6697
531	453002	V. rupestris B38 x 'Horizon'	right	335.733	-74.1778	-325.511	-575.727	173.569	-185.729	-347.457	-160.359	-442.165	-77.6983	-105.038	336.039	-88.5534	370.125	342.789	385.527	161.581	-27.2919	295.053	9.2917
532	453002	V. rupestris B38 x 'Horizon'	right	387.321	-47.5982	-400.861	-520.642	181.869	-198.554	-343.347	-130.878	-406.672	-79.6939	-116.408	265.365	-126.719	312.914	268.238	420.524	204.815	-32.0207	351.764	10.5833
533	453002	V. rupestris B38 x 'Horizon'	right	356.624	-81.9303	-309.228	-550.929	159.48	-181.315	-378.901	-176.748	-477.476	-72.7007	-59.5814	323.216	-52.041	356.253	276.624	402.225	184.883	-40.7271	299.615	22.6564
534	453002	V. rupestris B38 x 'Horizon'	right	360.802	-63.4785	-336.863	-546.958	179.434	-207.926	-362.177	-159.426	-447.114	-91.8043	-74.4323	329.785	-78.7038	390.183	264.884	378.776	192.82	-36.8202	301.349	7.66959
535	453003	V. rupestris B38 x 'Horizon'	right	342.185	-77.0429	-411.181	-553.102	192.102	-141.749	-318.024	-178.833	-386.62	-108.49	-111.955	304.524	-129.197	359.789	343.78	393.836	169.397	-29.0986	309.515	30.1657
536	453003	V. rupestris B38 x 'Horizon'	right	307.24	-65.1742	-339.194	-647.949	156.564	-171.52	-343.662	-124.262	-425.7	-73.3653	-66.667	326.231	-81.9137	373.502	332.151	373.648	179.195	-14.2942	281.984	23.1825
537	453003	V. rupestris B38 x 'Horizon'	right	347.456	-75.5131	-351.109	-606.91	165.876	-207.591	-330.694	-120.322	-399.881	-55.3107	-110.84	305.309	-108.49	356.743	328.401	409.847	140.123	-14.801	319.159	8.54927
538	453003	V. rupestris B38 x 'Horizon'	right	350.227	-71.3098	-332.261	-570.671	137.68	-204.877	-349.433	-138.67	-435.996	-103.277	-82.5472	326.674	-68.3453	364.624	306.037	424.134	171.547	-13.6516	303.092	-12.976
539	453003	V. rupestris B38 x 'Horizon'	right	308.369	-78.7208	-300.181	-597.488	144.429	-209.962	-358.172	-149.831	-427.599	-96.8631	-84.0999	350.013	-69.5474	411.663	338.211	360.164	151.04	-13.4761	297.551	24.5008
540	453003	V. rupestris B38 x 'Horizon'	right	325.648	-58.4017	-368.809	-634.519	184.933	-204.94	-325.691	-112.507	-384.915	-53.4336	-99.6719	319.027	-92.5996	355.819	308.207	406.579	140.911	-17.1676	311.988	-0.45684
541	453004	V. rupestris B38 x 'Horizon'	right	346.146	-52.034	-371.388	-644.097	182.504	-194.838	-328.223	-128.279	-433.732	-73.2731	-52.7152	335.084	-50.3824	380.438	247.895	339.388	171.413	-17.7711	288.483	55.3822
542	453004	V. rupestris B38 x 'Horizon'	right	366.199	-62.1464	-402.233	-579.925	162.555	-211.742	-314.467	-153.978	-401.156	-91.1107	-73.0689	310.245	-80.7051	364.012	271.275	426.746	189.579	-35.1218	282.022	33.02
543	453004	V. rupestris B38 x 'Horizon'	right	309.353	-65.1985	-311.454	-633.728	131.344	-201.856	-346.814	-154.694	-418.32	-91.0063	-43.8288	352.124	-37.3544	405.504	329.516	393.506	137.758	-24.6315	249.801	19.9804
544	453004	V. rupestris B38 x 'Horizon'	right	380.509	-70.3196	-342.741	-548.87	105.605	-207.455	-348.863	-163.798	-437.966	-92.9794	-79.822	314.971	-69.9232	353.519	274.751	415.669	179.697	-25.6007	338.752	24.8646
545	453004	V. rupestris B38 x 'Horizon'	right	392.017	-42.0245	-419.672	-591.932	167.995	-204.968	-313.683	-121.775	-399.693	-68.2858	-90.899	282.194	-100.407	328.497	251.158	401.218	187.075	-20.0025	326.109	37.0786
546	453004	V. rupestris B38 x 'Horizon'	right	376.648	-68.0705	-412.576	-544.293	160.45	-218.377	-309.608	-148.292	-377.214	-102.274	-105.482	310.419	-111.784	352.105	276.936	423.735	180.175	-40.064	322.455	35.1106
547	453005	V. rupestris B38 x 'Horizon'	right	351.044	-54.5992	-358.114	-633.074	173.754	-199.218	-332.657	-134.271	-435.847	-63.7863	-66.7684	311.093	-67.8209	377.019	291.689	371.506	152.379	-9.27036	292.341	34.6004
548	453005	V. rupestris B38 x 'Horizon'	right	288.499	-21.0689	-342.859	-666.384	135.202	-179.92	-349.672	-148.248	-428.319	-105.889	-21.1018	339.352	-9.3344	390.011	307.134	359.817	163.016	4.14122	257.435	28.1891
549	453005	V. rupestris B38 x 'Horizon'	right	393.389	-20.2283	-429.174	-621.751	170.493	-165.586	-322.962	-113.755	-396.829	-75.5351	-87.3901	263.585	-100.277	319.604	285.09	373.637	164.715	-4.27703	322.945	44.3057
550	453005	V. rupestris B38 x 'Horizon'	right	306.558	-37.0111	-322.285	-589.843	132.719	-186.818	-345.517	-182.516	-444.411	-125.278	-67.7348	347.279	-62.7398	392.553	383.386	355.51	152.206	-9.05899	267.82	35.1839
551	453005	V. rupestris B38 x 'Horizon'	right	399.313	-27.2619	-405.379	-555.349	174.369	-199.423	-323.15	-146.756	-444.068	-83.7058	-82.87	278.811	-92.436	325.391	263.659	398.94	185.665	-20.0825	324.896	29.4354
552	453005	V. rupestris B38 x 'Horizon'	right	368.286	-12.4664	-385.669	-662.144	179.807	-185.965	-327.987	-124.545	-447.965	-41.4144	-35.4543	295.491	-45.1687	342.275	240.638	351.861	184.717	-13.0772	268.798	49.986
553	453007	V. rupestris B38 x 'Horizon'	right	299.033	-48.6383	-314.872	-604.482	108.498	-246.035	-335.47	-181.984	-429.584	-87.7771	-57.3254	321.126	-50.933	411.404	353.556	385.461	147.758	-13.6503	279.339	64.5756
554	453007	V. rupestris B38 x 'Horizon'	right	316.138	-61.7857	-310.19	-606.569	130.271	-233.716	-326.568	-153.248	-448.743	-104.608	-66.1845	333.648	-45.809	401.019	359.129	379.613	120.025	-6.99934	271.933	52.6453
555	453007	V. rupestris B38 x 'Horizon'	right	304.98	-83.4945	-279.005	-592.386	85.9726	-239.447	-287.037	-168.744	-459.435	-86.0725	-76.8204	351.982	-74.11	418.501	371.798	378.084	132.504	-17.0973	281.152	38.6747
556	453007	V. rupestris B38 x 'Horizon'	right	325.565	-57.3225	-331.384	-610.336	106.582	-241.66	-307.862	-150.008	-425.312	-76.1517	-79.6702	328.953	-86.8841	385.191	345.979	397.526	157.422	-14.1052	295.565	37.9132
557	453007	V. rupestris B38 x 'Horizon'	right	299.497	-44.3617	-317.92	-597.949	102.093	-235.252	-319.626	-163.777	-440.606	-118.438	-61.3397	321.372	-64.6696	399.895	388.916	383.599	135.821	-3.04356	277.835	57.9555
558	453007	V. rupestris B38 x 'Horizon'	right	362.056	-69.9758	-338.367	-580.431	135.246	-236.202	-344.443	-140.17	-428.146	-80.7157	-89.9159	292.009	-86.1549	359.48	342.066	409.735	146.087	-12.8167	301.571	59.0879
559	453008	V. rupestris B38 x 'Horizon'	right	361.655	-27.2656	-421.697	-584.581	161.731	-168.583	-351.231	-139.473	-445.802	-107.63	-20.6783	236.654	-22.8588	278.992	245.95	446.115	173.663	9.63249	319.269	56.1396
560	453008	V. rupestris B38 x 'Horizon'	right	397.536	13.3636	-400.794	-684.277	212.823	-162.038	-350.968	-64.065	-399.114	-7.64344	-72.0891	235.969	-88.4709	318.349	219.513	232.203	175.856	27.8128	305.708	90.3254
561	453008	V. rupestris B38 x 'Horizon'	right	393.56	-61.0084	-406.383	-548.302	159.312	-202.641	-311.917	-143.457	-380.082	-89.8869	-113.066	284.548	-129.401	355.687	294.603	421.068	170.05	-22.8684	323.325	6.86241
562	453008	V. rupestris B38 x 'Horizon'	right	345.725	-60.9871	-351.399	-611.465	183.412	-177.904	-355.383	-131.709	-421.95	-83.0027	-78.8621	320.089	-82.0013	360.106	324.773	389.665	144.696	-15.922	290.988	11.1302
563	453008	V. rupestris B38 x 'Horizon'	right	390.448	-67.253	-391.05	-471.074	151.003	-214.241	-312.594	-166.268	-408.34	-139.107	-121.165	295.542	-131.415	358.644	309.505	418.724	187.069	-29.0128	326.539	14.0465
564	453008	V. rupestris B38 x 'Horizon'	right	348.951	-63.3855	-337.291	-611.22	154.334	-217.918	-344.195	-107.398	-421.012	-42.8723	-77.0635	296.635	-105.521	358.372	292.318	417.321	182.838	-31.1467	306.643	1.61306
565	453009	V. rupestris B38 x 'Horizon'	right	305.908	-79.4993	-315.357	-668.346	133.907	-225.462	-327.752	-131.619	-390.027	-52.0127	-45.3404	323.755	-45.1866	415.467	309.705	404.561	104.704	-2.91607	269.438	16.0727
566	453009	V. rupestris B38 x 'Horizon'	right	349.498	-35.526	-322.317	-637.789	152.436	-208.46	-345.56	-147.503	-445.813	-62.5281	-68.2671	312.926	-63.4977	380.195	348.388	334.682	110.009	0.131543	285.124	63.8722
567	453009	V. rupestris B38 x 'Horizon'	right	357.117	-78.8431	-349.318	-522.701	143.159	-227.636	-331.804	-163.921	-407.671	-113.796	-112.477	292.964	-125.559	388.966	361.363	405.276	149.884	-17.0869	315.305	36.7787
568	453009	V. rupestris B38 x 'Horizon'	right	303.69	-45.7687	-322.186	-651.594	153.894	-212.756	-331.118	-165.866	-422.849	-70.3156	-55.307	335.764	-52.9197	411.403	356.263	340.971	113.973	0.167548	256.559	57.9951
569	453009	V. rupestris B38 x 'Horizon'	right	328.575	-102.678	-265.897	-603.232	131.592	-244.016	-348.926	-128.612	-413.537	-64.1868	-84.5341	345.384	-65.6765	411.646	334.98	404.23	112.971	-14.8283	270.453	-3.70627
570	453009	V. rupestris B38 x 'Horizon'	right	359.84	-68.6563	-367.203	-573.881	156.096	-201.395	-341.26	-152.441	-433.702	-62.5789	-85.3909	261.558	-90.569	326.902	325.137	442.118	161.502	-14.6101	315.55	42.9839
571	453010	V. rupestris B38 x 'Horizon'	right	343.945	-37.6645	-412.857	-590.09	142.158	-204.021	-320.764	-165.188	-412.875	-113.276	-51.2262	302.416	-57.2277	354.479	276.406	415.186	187.184	-20.003	305.257	58.1607
572	453010	V. rupestris B38 x 'Horizon'	right	350.573	-53.8384	-347.009	-592.967	121.983	-203.513	-354.715	-148.355	-432.414	-97.8425	-52.4341	297.781	-60.3848	362.98	308.566	422.766	152.194	-15.0017	313.64	27.9917
573	453010	V. rupestris B38 x 'Horizon'	right	349.327	-49.8846	-412.761	-567.83	131.535	-206.602	-315.764	-165.853	-396.275	-127.305	-71.8744	303.296	-82.4521	347.422	310.337	430.075	179.676	-7.45706	308.251	44.1385
574	453010	V. rupestris B38 x 'Horizon'	right	324.807	-63.2887	-310.185	-614	140.424	-231.456	-331.46	-161.021	-423.747	-30.5367	-79.4622	324.257	-93.8819	392.062	330.833	399.559	156.703	-21.9509	285.97	6.37576
575	453010	V. rupestris B38 x 'Horizon'	right	277.882	-54.7497	-332.019	-569.227	128.025	-213.554	-322.582	-202.824	-421.101	-118.173	-56.5218	337.969	-43.311	418.909	341.328	433.943	164.88	-27.6283	263.42	-4.66324
576	453010	V. rupestris B38 x 'Horizon'	right	293.191	-56.7718	-305.129	-614.141	129.853	-196.197	-335.479	-192.718	-431.478	-96.9639	-57.7265	343.492	-46.3956	418.5	383.403	369.27	130.017	-15.0828	239.744	40.6126
577	453011	V. rupestris B38 x 'Horizon'	right	326.105	-51.4942	-330.643	-609.346	138.381	-188.949	-331.524	-185.16	-457.754	-62.2265	-72.7782	317.585	-60.0669	360.501	348.408	393.917	138.27	-1.77272	301.602	26.9455
578	453011	V. rupestris B38 x 'Horizon'	right	366.261	-27.0255	-374.059	-646.393	139.094	-207.502	-299.961	-102.579	-406.75	19.7274	-116.943	208.661	-121.25	274.479	364.937	426.142	162.554	11.2175	286.118	43.2729
579	453011	V. rupestris B38 x 'Horizon'	right	278.948	-69.4039	-298.891	-631.163	136.559	-202.236	-238.604	-147.086	-470.283	-90.1426	-86.3515	344.639	-65.641	420.713	409.444	364.917	99.1274	-2.06417	235.692	11.8277
580	453011	V. rupestris B38 x 'Horizon'	right	327.914	-90.7337	-299.376	-583.496	133.842	-206.973	-331.476	-174.362	-434.743	-71.8451	-89.8381	322.545	-79.3882	398.036	368.213	407.885	115.555	-16.7138	289.298	15.6564
581	453011	V. rupestris B38 x 'Horizon'	right	288.535	-84.0715	-253.173	-601.746	114.704	-213.96	-343.999	-174.196	-439.662	-89.2152	-73.3576	358.638	-48.394	437.136	379.281	350.495	114.528	-20.9015	261.537	37.8202
582	453011	V. rupestris B38 x 'Horizon'	right	306.198	-80.5458	-283.507	-594.515	149.033	-223.728	-348.491	-178.469	-454.734	-50.2125	-63.2927	311.727	-57.4853	381.783	365.295	421.185	119.053	-10.2501	267.931	23.0257
583	453012	V. rupestris B38 x 'Horizon'	right	351.779	-46.6319	-424.449	-591.739	147.689	-188.948	-290.733	-160.01	-404.793	-112.829	-83.6566	297.544	-86.9927	364	303.47	400.453	172.222	-6.26624	315.464	44.4256
584	453012	V. rupestris B38 x 'Horizon'	right	355.543	-31.3573	-385.907	-591.105	156.471	-192.199	-329.012	-164.039	-414.254	-91.5303	-88.1302	301.832	-99.07	370.063	335.31	379.862	174.173	-22.3046	294.875	40.7791
585	453012	V. rupestris B38 x 'Horizon'	right	296.089	-48.4072	-318.767	-661.229	119.591	-169.813	-311.834	-139.194	-460.214	-76.1565	-55.819	327.057	-56.5113	375.881	363.512	372.07	147.423	-3.11542	276.53	22.9082
586	453012	V. rupestris B38 x 'Horizon'	right	322.35	-62.2907	-368.284	-580.588	124.84	-233.129	-288.856	-152.876	-402.136	-101.61	-91.2151	330.743	-97.1585	402.96	316.528	418.339	197.367	-31.9659	286.563	10.4183
587	453012	V. rupestris B38 x 'Horizon'	right	340.262	-72.7089	-336.874	-604.582	140.997	-209.846	-305.431	-146.332	-435.974	-53.0468	-94.0325	324.927	-82.3218	377.001	297.549	411.131	151.879	-9.7522	323.947	-16.7911
588	453012	V. rupestris B38 x 'Horizon'	right	385.691	-63.8022	-412.502	-546.025	146.017	-226.791	-276.994	-165.949	-392.41	-59.702	-105.323	263.908	-118.934	336.282	285.884	456.384	145.899	-9.6468	342.672	15.3414
589	453013	V. rupestris B38 x 'Horizon'	right	410.4	-59.1558	-414.408	-504.487	152.582	-197.244	-321.198	-154.112	-404.163	-91.9304	-102.355	264.444	-124.278	307.702	256.124	432.596	181.425	-14.4828	365.871	16.6704
590	453013	V. rupestris B38 x 'Horizon'	right	351.647	-74.4209	-327.556	-570.6	167.843	-189.921	-335.242	-129.337	-448.355	-51.4512	-107.112	301.085	-117.836	352.961	315.454	413.801	183.518	-22.0966	317.639	-30.0187
591	453013	V. rupestris B38 x 'Horizon'	right	360.808	-51.808	-368.852	-608.314	149.124	-223.463	-334.608	-129.151	-420.582	-71.6404	-56.9474	300.592	-72.9604	362.798	266.573	415.826	171.633	-18.4427	305.811	23.6018
592	453013	V. rupestris B38 x 'Horizon'	right	345.676	-68.0382	-376.317	-643.098	147.842	-195.213	-342.689	-108.777	-403.066	-88.7185	-60.6778	301.285	-54.6434	340.39	296.037	410.778	145.364	3.88491	302.475	47.5068
593	453013	V. rupestris B38 x 'Horizon'	right	326.065	-54.9244	-363.219	-566.212	147.155	-200.779	-346.477	-165.804	-420.429	-127.324	-78.3847	310.763	-78.6929	354.1	367.588	419.857	163.618	-4.93855	282.777	35.2617
594	453013	V. rupestris B38 x 'Horizon'	right	351.108	-71.3539	-361.746	-602.987	155.923	-206.383	-335.401	-135.832	-417.606	-77.262	-79.7338	310.397	-95.0641	351.098	323.086	409.496	159.159	-11.746	300.275	34.5719
595	453014	V. rupestris B38 x 'Horizon'	right	354.205	-48.708	-360.258	-613.707	155.797	-194.215	-356.105	-129.565	-423.449	-77.5831	-66.2929	303.893	-80.465	346.301	306.918	400.328	163.575	-11.5256	306.074	24.7809
596	453014	V. rupestris B38 x 'Horizon'	right	353.561	-54.8334	-368.181	-548.565	157.848	-199.708	-332.166	-145.087	-434.486	-91.2006	-102.62	299.855	-111.564	348.365	303.81	409.752	191.033	-20.1158	342.764	1.53845
597	453014	V. rupestris B38 x 'Horizon'	right	348.775	-61.9731	-380.802	-587.172	155.781	-199.072	-307.292	-135.732	-392.593	-74.9576	-105.443	296.439	-125.844	358.481	329.037	424.434	151.661	-13.5236	326.721	-6.9237
598	453014	V. rupestris B38 x 'Horizon'	right	368.82	-71.9186	-381.419	-540.378	142.421	-204.717	-324.79	-154.074	-405.229	-129.914	-93.3583	304.311	-98.4559	364.698	321.028	425.761	147.74	-16.6367	323.244	22.8668
599	453014	V. rupestris B38 x 'Horizon'	right	402.533	-67.0503	-390.81	-528.04	181.017	-217.072	-335.575	-125.282	-387.894	-71.0756	-118.366	277.602	-132.156	313.4	277.88	433.873	157.378	-17.6042	345.994	1.24929
600	453014	V. rupestris B38 x 'Horizon'	right	347.728	-80.2702	-321.669	-560.088	152.511	-213.36	-332.994	-156.711	-436.799	-53.3748	-99.3072	307.059	-98.7656	365.416	321.452	438.773	153.217	-34.2149	314.625	-13.2294
601	453015	V. rupestris B38 x 'Horizon'	right	318.895	-85.8285	-450.718	-417.85	157.671	-202.418	-241.496	-196.96	-327.024	-207.602	-130.192	291.88	-166.09	381.466	357.68	430.664	183.634	-31.3319	297.639	37.9806
602	453015	V. rupestris B38 x 'Horizon'	right	328.868	-23.1617	-341.113	-681.303	87.8737	-211.487	-318.123	-128.951	-417.096	-90.8718	-18.0735	352.411	-19.9676	404.929	273.037	329.255	179.302	-22.8765	245.292	72.055
603	453015	V. rupestris B38 x 'Horizon'	right	314.316	-23.5897	-329.39	-619.238	102.605	-215.179	-331.135	-146.421	-406.767	-97.4125	-94.9265	334.114	-75.379	383.403	381.343	380.708	156.146	-15.2693	283.188	18.8848
604	453015	V. rupestris B38 x 'Horizon'	right	344.105	-37.2249	-396.692	-592.199	143.355	-185.286	-300.36	-171.173	-404.839	-105.782	-95.2783	309.311	-105.433	382.538	350.027	379.736	171.548	-14.759	293.567	34.8395
605	453015	V. rupestris B38 x 'Horizon'	right	312.86	-40.5057	-352.043	-609.591	129.428	-198.09	-323.676	-161.661	-415.882	-115.551	-79.4397	322.382	-73.4885	397.348	372.003	381.645	150.713	-5.1398	279.524	29.163
606	453015	V. rupestris B38 x 'Horizon'	right	348.328	-25.6533	-402.895	-612.23	140.37	-213.261	-294.217	-147.258	-393.84	-95.2197	-102.9	300.511	-84.9482	361.959	347.777	398.048	150.049	-16.9172	292.276	50.0205
607	453016	V. rupestris B38 x 'Horizon'	right	383.469	-21.214	-431.127	-596.093	170.861	-181.141	-294.784	-166.887	-427.61	-46.1354	-76.0067	256.065	-108.759	322.749	276.935	389.001	178.958	-4.3206	328.063	47.9764
608	453016	V. rupestris B38 x 'Horizon'	right	319.579	-22.1257	-345.862	-633.938	122.987	-174.321	-375.247	-158.051	-435.738	-115.276	-10.4543	301.755	-26.0614	357.276	338.503	388.921	140.516	-2.52568	271.778	58.2842
609	453016	V. rupestris B38 x 'Horizon'	right	327.859	-30.7539	-331.323	-631.395	115.877	-200.623	-341.906	-154.577	-445.99	-113.725	-19.9174	320.654	-44.5966	399.465	335.201	359.04	127.214	-6.86721	277.581	58.7827
610	453016	V. rupestris B38 x 'Horizon'	right	313.594	-18.7435	-394.641	-639.197	138.44	-195.313	-297.486	-160.076	-436.285	-94.3713	-52.5768	300.6	-46.0685	362.254	322.218	394.363	162.038	-3.55864	290.767	54.0419
611	453016	V. rupestris B38 x 'Horizon'	right	310.323	-49.0445	-298.553	-603.678	132.27	-197.948	-331.193	-145.441	-468.358	-93.4831	-72.6399	327.186	-90.8573	384.38	390.146	362.427	144.561	-6.1956	284.301	21.7971
612	453016	V. rupestris B38 x 'Horizon'	right	301.642	-43.7981	-350.591	-626.144	142.202	-204.625	-319.453	-157.629	-442.637	-105.757	-30.994	317.838	-44.9559	390.653	329.591	405.851	137.537	-4.41299	277.66	28.0239
613	453017	V. rupestris B38 x 'Horizon'	right	384.665	-70.2762	-406.272	-584.326	135.368	-186.801	-321.691	-126.894	-361.537	-108.773	-91.153	302.103	-97.1956	364.138	274.638	425.068	163.082	-21.2822	320.096	7.04444
614	453017	V. rupestris B38 x 'Horizon'	right	405.505	-38.1853	-437.641	-593.836	211.667	-216.378	-316.825	-107.256	-363.164	-16.6535	-86.1824	243.255	-106.224	307.595	204.184	425.231	187.441	-31.0251	301.239	27.2519
615	453017	V. rupestris B38 x 'Horizon'	right	410.281	-44.2321	-425.851	-507.236	177.274	-199.808	-306.224	-185.175	-406.434	-80.3037	-107.194	264.992	-128.43	318.896	286.767	424.194	171.166	-14.5143	328.646	23.1865
616	453017	V. rupestris B38 x 'Horizon'	right	392.459	-53.2971	-456.166	-540.754	145.27	-195.445	-293.223	-145.026	-371.897	-110.503	-103.22	267.165	-117.98	311.737	264.609	420.918	183.347	-7.50437	356.801	52.7101
617	453017	V. rupestris B38 x 'Horizon'	right	390.227	-76.3765	-390.141	-578.667	129.646	-191.506	-318.899	-110.363	-399.232	-79.5471	-95.6394	295.068	-114.193	319.761	267.47	427.584	187.559	-17.2538	343.202	11.2998
618	453017	V. rupestris B38 x 'Horizon'	right	386.989	-15.4437	-452.57	-631.582	157.83	-185.628	-299.429	-137.545	-351.116	-73.3056	-92.4622	294.405	-84.0097	341.643	250.723	364.04	155.186	-7.507	328.859	50.9237
619	453018	V. rupestris B38 x 'Horizon'	right	351.759	-61.8076	-359.328	-592.967	140.708	-220.548	-313.397	-131.783	-421.313	-90.9114	-87.7941	315.498	-103.865	370.182	330.802	403.441	155.966	-18.5791	306.461	27.4744
620	453018	V. rupestris B38 x 'Horizon'	right	322.871	-70.7299	-319.532	-585.568	147.239	-207.19	-352.02	-154.276	-429.115	-74.7571	-79.8042	305.439	-71.0861	382.123	336.105	433.963	149.701	-28.5859	295.642	-0.418116
621	453018	V. rupestris B38 x 'Horizon'	right	315.38	-61.7838	-369.742	-632.872	151.77	-204.492	-324.926	-133.98	-413.986	-78.8684	-54.8542	307.828	-48.3771	358.216	293.346	433.106	139.516	-15.6665	311.873	28.5138
622	453018	V. rupestris B38 x 'Horizon'	right	347.923	-63.6327	-333.766	-611.298	145.978	-239.492	-341.625	-112.855	-426.894	-60.1313	-83.743	296.484	-92.5623	349.596	328.94	405.14	141.174	-1.11721	314.575	37.3072
623	453018	V. rupestris B38 x 'Horizon'	right	309.445	-55.0815	-315.482	-635.259	127.77	-208.791	-355.747	-152.456	-412.143	-66.6671	-66.3192	328.336	-73.0354	360.237	370.323	394.936	133.115	16.1826	282.074	18.5641
624	453018	V. rupestris B38 x 'Horizon'	right	306.007	-68.6258	-360.289	-632.906	152.628	-211.74	-340.148	-155.749	-385.407	-100.823	-52.4983	336.246	-47.4158	394.24	316.531	398.598	131.894	1.52308	278.698	39.2368
625	453020	V. rupestris B38 x 'Horizon'	right	355.864	-77.0286	-397.935	-480.618	168.733	-215.129	-297.828	-191.423	-405.923	-131.511	-109.529	307.263	-126.821	368.003	321.49	432.094	183.818	-33.7242	308.131	22.0733
626	453020	V. rupestris B38 x 'Horizon'	right	300.403	-61.3228	-306.601	-537.738	117.687	-196.281	-341.186	-177.755	-434.526	-166.46	-79.7975	337.897	-62.3585	392.196	422.475	400.028	124.424	-29.418	259.479	38.854
627	453020	V. rupestris B38 x 'Horizon'	right	348.358	-69.7948	-375.726	-582.792	150.057	-210.453	-323.635	-159.451	-418.134	-103.82	-69.6661	315.056	-67.383	381.724	300.261	417.251	172.985	-37.2258	282.883	49.5059
628	453020	V. rupestris B38 x 'Horizon'	right	303.689	-83.7562	-288.692	-581.807	158.657	-204.738	-334.728	-168.328	-434.695	-88.8613	-68.9207	361.18	-64.115	425.453	338.987	403.313	140.392	-40.3499	249.425	-22.105
629	453020	V. rupestris B38 x 'Horizon'	right	341.684	-108.444	-319.485	-564.555	158.492	-235.77	-312.398	-141.15	-427.392	-33.5951	-95.3589	306.65	-98.3229	377.549	284.648	460.309	168.282	-44.2818	299.851	-16.713
630	453020	V. rupestris B38 x 'Horizon'	right	363.072	-78.9223	-366.825	-601.891	138.189	-225.2	-305.666	-128.7	-387.123	-39.8627	-93.6064	296.168	-119.585	349.567	309.26	445.927	159.778	-36.1905	302.507	19.1033
631	453022	V. rupestris B38 x 'Horizon'	right	358.868	-39.9484	-357.749	-606.042	126.239	-215.046	-328.665	-126.674	-451.957	-86.4156	-73.2755	304.811	-76.5999	346.372	305.861	383.816	175.785	-9.5209	321.493	48.6483
632	453022	V. rupestris B38 x 'Horizon'	right	358.858	-53.0198	-382.906	-602.221	150.254	-191.997	-328.959	-125.218	-425.274	-87.6326	-83.9702	293.518	-96.8791	345.465	308.29	394.095	180.997	-17.5858	319.588	44.5947
633	453022	V. rupestris B38 x 'Horizon'	right	398.43	-33.7753	-380.725	-599.873	166.088	-197.666	-339.647	-132.96	-432.508	-64.984	-83.404	284.031	-89.6136	345.105	277.583	368.808	160.26	-0.13607	323.538	31.4492
634	453022	V. rupestris B38 x 'Horizon'	right	357.506	-58.1944	-355.99	-612.379	142.979	-224.036	-325.094	-141.334	-416.553	-24.595	-97.448	276.685	-97.967	314.78	344.226	434.322	149.76	-8.20766	298.581	42.9583
635	453022	V. rupestris B38 x 'Horizon'	right	356.18	-45.7175	-388.067	-646.692	166.156	-211.987	-328.17	-141.373	-397.381	-67.8342	-62.7239	307.04	-43.5976	366.089	280.686	386.169	129.533	-6.0794	287.384	60.3859
636	453022	V. rupestris B38 x 'Horizon'	right	356.155	-51.7932	-342.231	-626.706	139.959	-211.692	-346.532	-123.145	-442.828	-54.95	-65.431	304.396	-74.2144	331.346	299.687	389.28	145.205	6.07941	330.229	37.1846
637	453023	V. rupestris B38 x 'Horizon'	right	342.482	-50.0795	-402.668	-583.165	177.504	-186.946	-340.308	-152.346	-412.015	-125.82	-71.1452	293.081	-77.2219	361.909	317.953	393.148	157.89	-6.13932	307.529	56.3574
638	453023	V. rupestris B38 x 'Horizon'	right	368.882	-44.2525	-411.945	-597.814	167.789	-213.428	-329.731	-141.488	-388.401	-99.2381	-73.5015	301.356	-86.6569	347.082	296.632	399.801	158.839	-9.12756	298.093	57.1102
639	453023	V. rupestris B38 x 'Horizon'	right	350.763	-38.2433	-381.324	-601.307	145.506	-182.569	-346.346	-152.402	-422.625	-119.314	-70.8243	315.463	-67.6358	354.458	325.749	375.996	166.734	-1.68344	300.003	49.6022
640	453023	V. rupestris B38 x 'Horizon'	right	315.695	-65.5795	-360.73	-630.537	127.309	-214.9	-325.282	-122.679	-396.684	-76.9278	-73.7627	290.778	-89.6722	351.81	356.581	433.919	159.319	-12.6489	287.225	46.7647
641	453023	V. rupestris B38 x 'Horizon'	right	376.978	-14.8378	-459.608	-588.35	157.028	-206.333	-313.267	-149.026	-375.337	-118.701	-64.9623	274.833	-69.5618	315.877	281.199	414.467	169.783	-3.83136	297.748	75.9032
642	453023	V. rupestris B38 x 'Horizon'	right	348.259	-34.1305	-422.941	-621.649	152.879	-201.691	-322.775	-139.78	-381.725	-94.3006	-55.0919	306.978	-67.5122	352.47	266.454	403.227	203.499	-34.1699	278.954	63.0461
643	453024	V. rupestris B38 x 'Horizon'	right	376.7	-50.991	-408.205	-591.861	159.007	-182.475	-302.936	-144.938	-447.555	-96.8067	-47.6012	281.781	-89.0729	347.846	272.69	400.505	174.184	-2.44064	312.79	39.38
644	453024	V. rupestris B38 x 'Horizon'	right	383.695	-46.2742	-416.073	-550.372	162.641	-192.929	-300.37	-156.955	-439.049	-101.008	-68.1633	271.185	-102.864	346.682	273.436	417.436	181.897	-22.7012	324.851	34.9362
645	453024	V. rupestris B38 x 'Horizon'	right	367.239	-79.38	-328.66	-557.39	170.345	-205.088	-303.954	-162.975	-480.099	-38.841	-90.3722	303.358	-106.088	374.983	280.162	398.782	163.023	-18.1442	328.404	-15.3054
646	453024	V. rupestris B38 x 'Horizon'	right	339.629	-44.4991	-337.056	-525.389	125.745	-183.347	-307.838	-205.602	-491.671	-139.329	-73.152	295.575	-54.1956	384.686	376.465	411.443	150.821	-19.8586	271.253	26.3206
647	453024	V. rupestris B38 x 'Horizon'	right	339.205	-33.0365	-356.873	-584.266	149.789	-188.916	-334.64	-172.725	-466.532	-127.705	-38.971	315.17	-30.9524	381.244	307.353	397.565	145.467	-6.0477	286.153	18.7159
648	453024	V. rupestris B38 x 'Horizon'	right	363.611	-43.2609	-314.716	-571.253	180.926	-193.443	-357.924	-129.268	-435.576	-66.4899	-125.359	296.584	-135.06	362.306	394.056	352.606	146.346	-22.8055	283.696	15.0249
649	453025	V. rupestris B38 x 'Horizon'	right	379.974	-54.7908	-392.35	-568.197	160.746	-193.085	-330.999	-140.66	-422.59	-92.3948	-89.7611	269.373	-92.707	340.08	293.671	416.592	150.435	4.39273	343.581	18.6896
650	453025	V. rupestris B38 x 'Horizon'	right	381.892	-38.03	-358.973	-593.634	151.585	-204.573	-338.247	-115.458	-449.25	-56.7078	-78.6509	291.549	-93.8081	334.067	266.688	394.993	186.275	-20.5148	332.489	8.30871
651	453025	V. rupestris B38 x 'Horizon'	right	333.176	-40.7985	-351.564	-660.76	161.386	-199.205	-328.015	-110.841	-416.427	-46.708	-75.522	312.29	-79.4779	363.157	317.583	383.589	155.61	-21.7526	283.249	21.0287
652	453025	V. rupestris B38 x 'Horizon'	right	357.293	-62.122	-293.694	-642.031	127.208	-210.957	-357.626	-118.817	-435.086	-32.2101	-55.9008	310.85	-67.0664	380.186	297.497	388.083	127.415	-22.9247	299.959	9.94191
653	453025	V. rupestris B38 x 'Horizon'	right	351.416	-78.7463	-351.21	-546.943	171.601	-215.078	-310.918	-139.242	-438.653	-85.2274	-85.8838	327.419	-106.728	392.344	260.063	409.836	189.194	-51.6989	321.118	-12.6644
654	453025	V. rupestris B38 x 'Horizon'	right	384.921	-66.7513	-377.724	-514.237	187.801	-173.104	-355.977	-162.049	-438.049	-113.173	-91.4549	293.753	-97.4177	339.515	286.351	408.757	167.925	-20.5632	333.625	7.85335
655	453026	V. rupestris B38 x 'Horizon'	right	316.117	-50.1983	-355.274	-650.672	130.614	-185.843	-312.58	-151.712	-444.966	-98.1942	-40.826	325.936	-43.2142	385.206	329.288	368.13	153.338	-4.59679	267.503	61.9437
656	453026	V. rupestris B38 x 'Horizon'	right	392.211	-53.9773	-385.135	-490.286	136.193	-234.484	-300.861	-143.257	-355.986	-112.876	-155.304	275.668	-170.737	323.882	392.893	428.384	125.34	-14.2086	321.385	21.1555
657	453026	V. rupestris B38 x 'Horizon'	right	345.349	-44.0662	-384.058	-606.012	123.184	-208.131	-323.597	-164.477	-391.364	-115.662	-63.1378	313.255	-72.7012	387.179	331.437	400.106	151.061	-9.6839	283.827	47.492
658	453026	V. rupestris B38 x 'Horizon'	right	366.599	-62.61	-419.228	-604.865	172.301	-201.634	-289.848	-140.229	-367.298	-81.3199	-101.944	313.596	-113.747	372.798	289.722	392.374	159.913	-11.1379	303.531	23.0283
659	453026	V. rupestris B38 x 'Horizon'	right	300.088	-85.6366	-327.626	-658.655	137.913	-201.377	-308.258	-131.462	-408.322	-59.1526	-65.9352	346.125	-63.5961	402.869	319.063	397.612	154.068	-33.0578	262.605	22.7357
660	453026	V. rupestris B38 x 'Horizon'	right	297.801	-60.0439	-347.578	-630.673	168.91	-193.29	-322.409	-129.811	-409.889	-87.0232	-72.5509	315.892	-81.8824	390.803	356.395	410.358	139.16	-23.2907	272.044	7.0787
661	453027	V. rupestris B38 x 'Horizon'	right	318.441	-66.0463	-330.59	-594.958	154.575	-200.439	-318.77	-155.524	-438.551	-50.7332	-76.151	324.312	-95.013	396.821	285.302	407.576	188.792	-23.4895	311.964	-37.5201
662	453027	V. rupestris B38 x 'Horizon'	right	350.767	-33.6115	-413.383	-638.358	192.242	-178.786	-331.034	-119.399	-391.578	-67.1258	-68.1783	292.4	-77.4827	344.075	263.708	393.571	169.788	-12.4254	305.151	19.6596
663	453027	V. rupestris B38 x 'Horizon'	right	332.195	-67.5592	-352.899	-631.262	141.459	-185.966	-318.364	-160.228	-426.162	-70.9241	-73.8109	333.292	-55.593	384.206	308.039	391.93	157.865	-22.4106	287.269	28.9217
664	453027	V. rupestris B38 x 'Horizon'	right	390.846	-87.0887	-385.073	-545.419	171.151	-236.871	-317.157	-139.993	-387.055	-50.1177	-109.437	295.386	-117.424	339.325	258.049	441.17	176.15	-42.1458	319.949	25.7541
665	453027	V. rupestris B38 x 'Horizon'	right	347.707	-29.6217	-400.79	-656.048	157.834	-197.038	-325.626	-106.988	-378.954	-68.4392	-66.1679	297.886	-67.1289	366.521	256.639	388.098	163.179	-20.8428	313.307	26.4728
666	453027	V. rupestris B38 x 'Horizon'	right	326.435	19.292	-354.165	-652.48	155.12	-165.829	-362.792	-168.692	-455.731	-114.072	-19.1172	318.83	5.45561	375.839	314.376	299.677	148.915	22.6955	241.503	64.7403
667	453028	V. rupestris B38 x 'Horizon'	right	311.94	-38.6596	-393.646	-637.705	166.204	-186.326	-320.389	-145.286	-416.884	-112.017	-45.2949	310.19	-51.9048	380.404	311.959	385.336	159.167	-3.80042	278.849	47.8644
668	453028	V. rupestris B38 x 'Horizon'	right	338.758	-56.6093	-376.715	-541.367	161.11	-208.253	-329.591	-172.671	-413.161	-121.963	-91.1046	302.276	-106.154	359.374	369.013	422.575	162.973	-24.9561	284.871	41.5937
669	453028	V. rupestris B38 x 'Horizon'	right	284.321	-59.7342	-326.986	-598.248	120.271	-178.927	-310.09	-171.876	-459.964	-120.317	-53.8684	313.389	-64.8996	404.961	382.435	400.201	157.275	-19.7172	271.507	30.2675
670	453028	V. rupestris B38 x 'Horizon'	right	351.523	-32.9613	-425.446	-540.544	158.788	-221.17	-290.504	-167.392	-414.888	-122.411	-62.1344	299.388	-107.314	362.058	278.605	423.519	207.187	-28.638	304.182	28.1509
671	453028	V. rupestris B38 x 'Horizon'	right	343.277	-66.5725	-339.429	-561.459	173.249	-181.157	-321.097	-148.721	-469.56	-85.9893	-103.161	301.207	-113.855	365.959	353.912	389.928	177.065	-17.3741	299.599	4.17769
672	453028	V. rupestris B38 x 'Horizon'	right	314.451	-62.319	-376.017	-550.067	162.955	-192.296	-296.707	-211.083	-427.063	-138.634	-74.7554	344.328	-77.8851	402.267	354.517	392.155	150.296	-18.1923	270.208	33.8416
673	453029	V. rupestris B38 x 'Horizon'	right	378.064	-54.891	-328.306	-579.759	155.913	-208.056	-368.309	-130.943	-461.138	-71.0431	-68.6588	301.823	-81.6782	331.533	309.871	399.421	161.43	-18.9294	302.812	30.8437
674	453029	V. rupestris B38 x 'Horizon'	right	361.456	-75.8783	-352.666	-479.181	147.938	-218.891	-316.382	-187.829	-416.173	-151.277	-116.792	319.663	-110.463	392.274	365.387	410.225	141.807	-34.9582	295.886	25.8519
675	453029	V. rupestris B38 x 'Horizon'	right	377.904	-66.0355	-416.526	-507.671	179.165	-210.337	-309.867	-170.23	-397.137	-128.227	-96.0525	298.915	-106.979	376.027	269.255	419.472	192.814	-30.7768	307.424	18.8634
676	453029	V. rupestris B38 x 'Horizon'	right	400.407	-66.3203	-363.948	-520.955	153.138	-218.957	-324.051	-148.03	-414.053	-100.812	-121.107	286.951	-123.612	354.405	337.775	412.412	126.158	-24.8819	329.292	26.1888
677	453029	V. rupestris B38 x 'Horizon'	right	436.157	-30.5544	-433.265	-431.772	199.591	-206.121	-328.133	-189.483	-406.812	-106.049	-118.741	236.766	-126.018	296.382	264.285	414.228	171.972	-24.2725	340.964	40.8757
678	453029	V. rupestris B38 x 'Horizon'	right	377.48	-79.069	-350.817	-516.742	171.692	-215.949	-346.937	-144.351	-420.857	-137.527	-102.506	319.353	-111.577	386.269	330.47	384.431	156.677	-29.882	296.376	33.4658
679	453030	V. rupestris B38 x 'Horizon'	right	382.689	-62.0586	-350.008	-550.861	148.411	-211.211	-350.407	-132.008	-422.757	-101.354	-89.1384	293.468	-105.049	364.789	315.047	413.912	148.613	-29.4964	322.599	14.8211
680	453030	V. rupestris B38 x 'Horizon'	right	392.846	-62.8651	-338.563	-572.747	148.483	-225.768	-353.355	-132.916	-428.071	-82.9643	-82.3564	292.2	-95.9241	361.877	327.212	404.691	137.152	-11.9939	292.576	30.4868
681	453030	V. rupestris B38 x 'Horizon'	right	382.181	-86.7289	-321.611	-533.257	177.692	-199.688	-375.804	-134.817	-461.585	-95.5124	-90.5971	299.806	-82.1119	344.119	306.228	408.112	155.44	-18.1091	310.168	16.0768
682	453030	V. rupestris B38 x 'Horizon'	right	408.123	-82.8301	-368.263	-506.81	190.452	-209.379	-351.063	-132.195	-415.429	-85.565	-124.478	278.754	-127.186	331.719	294.403	414.751	166.957	-28.319	326.484	19.8735
683	453030	V. rupestris B38 x 'Horizon'	right	346.902	-60.3361	-339.715	-580.76	127.012	-211.422	-359.059	-169.179	-421.258	-109.456	-71.1093	334.135	-65.395	385.659	321.353	379.428	162.657	-17.7393	298.612	49.6696
684	453030	V. rupestris B38 x 'Horizon'	right	369.835	-60.48	-377.255	-566.722	177.903	-217.748	-338.163	-144.234	-400.001	-85.7691	-102.504	303.214	-101.311	359.742	318.582	413.191	161.713	-36.679	291.201	35.4856
685	453031	V. rupestris B38 x 'Horizon'	right	359.099	-59.7701	-435.715	-545.81	165.889	-201.493	-295.419	-132.255	-381.925	-131.214	-68.0053	284.617	-131.572	322.43	318.672	459.156	185.402	-30.9292	283.574	35.2684
686	453031	V. rupestris B38 x 'Horizon'	right	327.303	-61.9603	-371.24	-626.448	155.006	-212.896	-313.775	-143.837	-406.025	-67.6976	-53.5738	298.415	-87.2697	377.356	317.572	430.095	154.744	-14.9793	277.258	21.9518
687	453031	V. rupestris B38 x 'Horizon'	right	327.454	-78.2196	-334.659	-580.289	162.083	-207.696	-294.908	-132.629	-443.274	-90.9273	-101.228	333.029	-104.053	404.291	334.277	399.858	181.147	-38.4193	273.163	-8.99805
688	453031	V. rupestris B38 x 'Horizon'	right	324.501	-49.3128	-403.996	-655.7	156.161	-179.807	-310.36	-152.853	-392.288	-84.0807	-50.2543	301.868	-48.1211	372.732	300.234	402.094	138.127	-5.84739	285.996	50.9074
689	453031	V. rupestris B38 x 'Horizon'	right	350.072	-46.0826	-382.283	-560.718	189.741	-200.031	-317.67	-164.921	-433.978	-65.656	-110.431	281.822	-101.337	337.615	331.268	421.299	151.213	-24.9828	323.405	21.654
690	453031	V. rupestris B38 x 'Horizon'	right	315.229	-64.1933	-303.628	-646.226	130.512	-193.786	-336.966	-127.631	-441.782	-58.1922	-67.6363	321.57	-75.1102	380.093	354.546	383.241	142.039	-15.1605	282.797	20.2838
691	453032	V. rupestris B38 x 'Horizon'	right	349.186	-55.4669	-348.477	-499.107	136.323	-231.85	-350.4	-183.96	-445.27	-144.747	-114.591	281.739	-57.062	377.925	343.771	404.414	169.919	5.30038	316.601	45.7533
692	453032	V. rupestris B38 x 'Horizon'	right	312.542	-43.4597	-335.419	-595.676	113.546	-189.896	-353.658	-149.356	-441.609	-119.438	-78.8458	307.614	-64.7371	344.667	388.434	395.791	164.017	-3.28834	295.73	53.0428
693	453032	V. rupestris B38 x 'Horizon'	right	342.681	-42.8017	-382.647	-602.714	162.056	-196.279	-342.745	-160.493	-413.133	-100.827	-75.9135	307.853	-76.2964	363.093	332.406	376.974	153.398	-9.74004	300.195	64.9346
694	453032	V. rupestris B38 x 'Horizon'	right	309.886	-30.2178	-327.014	-611.832	146.826	-213.43	-346.491	-165.866	-452.343	-130.638	-38.9725	322.881	-35.8799	402.108	370.636	333.913	120.713	7.61906	252.639	85.4631
695	453032	V. rupestris B38 x 'Horizon'	right	355.073	-50.9077	-338.967	-549.577	134.104	-229.881	-351.769	-184.148	-432.183	-100.706	-72.083	307.947	-80.0879	359.541	354.905	416.464	133.219	-14.6092	297.788	45.8769
696	453032	V. rupestris B38 x 'Horizon'	right	311.201	-61.0119	-286.1	-594.144	123.188	-178.452	-365.595	-149.326	-462.084	-95.306	-72.6215	329.119	-60.2959	377.434	360.012	389.668	153.333	-17.0627	298.964	-0.917599
697	453033	V. rupestris B38 x 'Horizon'	right	351.398	-43.0333	-366.525	-595.746	147.465	-211.478	-341.802	-169.003	-445.294	-102.868	-22.0689	308.625	-39.0905	375.563	281.003	407.561	167.632	-21.6704	267.284	52.0494
698	453033	V. rupestris B38 x 'Horizon'	right	376.93	-29.2535	-392.422	-621.006	160.519	-194.138	-318.599	-115.527	-446.16	-60.5264	-72.2591	279.685	-76.4799	320.565	275.378	394.079	183.671	-18.2203	309.423	44.3425
699	453033	V. rupestris B38 x 'Horizon'	right	334.622	-64.0419	-308.067	-674.013	159.227	-212.149	-343.496	-113.071	-417.923	-7.86802	-45.5213	316.571	-75.3718	394.531	280.97	369.651	142.984	-30.9582	272.577	21.3484
700	453033	V. rupestris B38 x 'Horizon'	right	383.345	-61.9188	-366.236	-603.44	155.641	-217.097	-339.281	-123	-425.613	-70.031	-71.9	275.398	-94.5554	361.989	300.173	397.417	164.903	-4.96502	293.522	45.6484
701	453033	V. rupestris B38 x 'Horizon'	right	341.106	-43.9135	-313.265	-580.887	159.867	-207.92	-358.622	-145.044	-449.289	-97.2178	-77.0701	306.92	-87.0348	373.976	388.921	384.063	134.116	-28.7257	261.272	38.7489
702	453033	V. rupestris B38 x 'Horizon'	right	368.201	-44.9929	-398.313	-590.68	155.083	-211.863	-321.379	-123.654	-427.191	-116.351	-56.8405	293.323	-79.9547	362.173	280.277	399.089	180.646	-17.9105	299.472	50.8673
703	453034	V. rupestris B38 x 'Horizon'	right	361.201	-79.3983	-334.584	-553.989	152.461	-213.782	-346.042	-132.326	-454.507	-102.074	-81.11	304.083	-83.1575	352.805	313.327	419.932	147.19	-18.2186	325.22	22.9681
704	453034	V. rupestris B38 x 'Horizon'	right	317.977	-44.7466	-335.326	-631.971	117.224	-230.168	-324.499	-143.337	-425.5	-66.6561	-67.362	310.896	-67.1728	371.924	343.93	410.094	152.853	-11.803	287.877	35.7686
705	453034	V. rupestris B38 x 'Horizon'	right	353.037	-42.518	-370.231	-621.041	131.274	-237.046	-327.949	-142.298	-419.322	-68.9757	-55.5349	301.293	-56.7325	354.354	289.05	416.838	165.533	-14.3667	290.875	53.7602
706	453034	V. rupestris B38 x 'Horizon'	right	369.699	-25.6645	-420.621	-625.62	136.025	-210.573	-288.981	-173.572	-404.473	-49.4451	-68.4667	286.347	-78.4488	335.846	290.593	403.986	170.157	-6.01615	294.517	64.7117
707	453034	V. rupestris B38 x 'Horizon'	right	332.518	-33.3214	-347.719	-620.801	134.201	-215.652	-335.764	-141.481	-435.783	-99.0198	-59.2304	330.528	-52.2165	387.392	310.034	373.074	166.277	-25.6583	287.683	44.9401
708	453034	V. rupestris B38 x 'Horizon'	right	322.693	-58.2989	-336.79	-617.125	143.537	-209.63	-351.874	-166.065	-427.428	-81.2167	-64.0509	314.763	-52.0591	361.645	357.698	399.048	132.147	-6.0345	276.128	62.9146
709	453035	V. rupestris B38 x 'Horizon'	right	353.393	-75.901	-373.109	-555.709	134.547	-205.454	-329.663	-182.885	-415.671	-118.336	-80.1486	315.598	-88.3663	365.459	338.451	408.294	158.627	-9.59555	301.94	58.5298
710	453035	V. rupestris B38 x 'Horizon'	right	350.559	-67.5839	-377.968	-598.274	177.102	-214.589	-359.611	-146.352	-402.849	-104.197	-53.3155	316.322	-57.6087	374.9	276.399	392.666	162.973	-8.45107	284.32	55.5582
711	453035	V. rupestris B38 x 'Horizon'	right	356.341	-30.0883	-388.508	-614.8	148.004	-218.922	-329.109	-161.258	-408.085	-78.5345	-73.521	302.925	-68.0541	353.186	318.09	392.343	153.38	-9.47978	291.462	64.6283
712	453035	V. rupestris B38 x 'Horizon'	right	352.115	-37.9328	-425.369	-583.663	197.645	-212.999	-320.884	-147.833	-381.661	-108.516	-87.8501	307.724	-90.5164	352.239	301.395	392.896	149.794	-16.5444	305.332	54.6299
713	453035	V. rupestris B38 x 'Horizon'	right	348.896	-39.4939	-409.241	-611.354	168.161	-230.146	-304.516	-141.336	-360.468	-94.3578	-102.443	314.049	-90.4867	356.222	345.642	401.126	128.996	-14.196	275.459	59.4853
714	453035	V. rupestris B38 x 'Horizon'	right	309.063	-81.6596	-320.675	-582.81	106.87	-220.798	-321.633	-178.136	-403.292	-123.394	-73.5503	351.258	-73.0704	408.782	382.123	400.966	133.334	-14.7063	260.829	40.4972
715	453037	V. rupestris B38 x 'Horizon'	right	308.506	-44.8525	-340.92	-655.05	90.6567	-185.098	-323.678	-121.18	-439.777	-114.786	-47.4516	320.337	-51.5512	364.061	354.211	374.595	168.15	9.28638	281.854	52.6877
716	453037	V. rupestris B38 x 'Horizon'	right	338.52	-47.1423	-405.188	-638.973	129.605	-188.271	-298.667	-116.453	-379.504	-96.2159	-75.7931	302.884	-109.26	366.211	315.594	391.371	172.562	-0.707836	312.131	27.298
717	453037	V. rupestris B38 x 'Horizon'	right	320.42	-25.9015	-443.888	-614.235	148.941	-197.593	-268.141	-171.573	-389.5	-109.547	-84.9311	301.4	-80.3732	370.138	318.649	386.276	191.33	-0.303177	287.493	61.3382
718	453037	V. rupestris B38 x 'Horizon'	right	348.481	-44.2947	-420.601	-621.616	176.74	-203.425	-288.642	-84.1591	-358.856	-17.4018	-126.466	230.332	-155.778	289.656	333.674	430.603	179.457	-23.5677	311.991	43.8726
719	453037	V. rupestris B38 x 'Horizon'	right	440.278	-24.3082	-455.51	-510.118	172.545	-206.365	-263.483	-124.442	-384.849	-34.0542	-120.249	244.966	-185.309	257.161	220.053	381.361	198.808	-28.7017	377.717	44.5008
720	453037	V. rupestris B38 x 'Horizon'	right	317.64	-34.4034	-375.063	-591.355	146.425	-196.573	-333.297	-174.493	-407.266	-124.919	-76.904	314.701	-90.3476	371.948	382.03	376.229	147.262	11.5365	289.521	47.3292
721	453038	V. rupestris B38 x 'Horizon'	right	353.784	-34.5283	-441.008	-607.232	141.058	-199.939	-299.974	-159.711	-409.327	-116.955	-43.3211	287.536	-59.0584	334.096	284.854	402.635	188.36	0.4109	284.633	93.6879
722	453038	V. rupestris B38 x 'Horizon'	right	322.628	-26.21	-397.314	-600.499	149.078	-184.148	-295.141	-173.428	-443.089	-125.941	-63.8403	314.679	-70.5726	366.873	348.636	378.012	160.841	-6.07482	288.774	56.7363
723	453038	V. rupestris B38 x 'Horizon'	right	347.078	-47.7218	-368.128	-618.583	176.95	-179.398	-337.225	-149.958	-437.201	-92.2537	-71.7361	317.451	-69.8104	393.749	305.175	336.856	175.384	-17.1264	279.515	56.9844
724	453038	V. rupestris B38 x 'Horizon'	right	278.22	-72.1695	-305.47	-618.768	87.9442	-218.949	-282.275	-182.22	-428.279	-105.785	-56.6911	358.67	-6.8412	427.569	335.392	417.948	104.042	-5.80188	273.958	-0.494131
725	453038	V. rupestris B38 x 'Horizon'	right	350.624	-40.3938	-359.34	-583.948	111.242	-233.428	-269.049	-171.809	-462.679	-82.186	-70.6873	321.314	-75.2629	383.851	306.168	406.656	171.363	-27.418	297.622	27.3607
726	453038	V. rupestris B38 x 'Horizon'	right	321.832	-56.8387	-321.766	-641.224	137.621	-199.488	-348.124	-166.114	-452.031	-70.702	-37.8881	307.109	-5.55845	400.634	306.333	383.777	151.297	-18.6841	248.284	61.5317
727	453039	V. rupestris B38 x 'Horizon'	right	407.255	-57.4442	-412.666	-601.329	167.872	-205.541	-333.245	-114.224	-396.694	-67.2489	-68.9903	253.858	-82.138	323.572	254.911	416.312	150.447	-15.0909	313.248	67.1368
728	453039	V. rupestris B38 x 'Horizon'	right	397.011	-91.0439	-356.783	-576.742	157.714	-240.735	-323.501	-103.366	-406.624	-31.2088	-105.999	267.9	-110.712	320.796	277.7	447.068	142.736	-12.8114	328.456	20.1424
729	453039	V. rupestris B38 x 'Horizon'	right	369.289	-84.0539	-376.658	-566.144	153.008	-214.095	-323.536	-126.079	-403.674	-91.6048	-107.146	295.915	-110.232	348.304	313.767	425.007	164.98	-23.4992	320.202	36.2501
730	453039	V. rupestris B38 x 'Horizon'	right	398.071	-65.9555	-422.196	-573.373	148.247	-226.549	-300.424	-114.161	-353.06	-94.9144	-108.231	297.615	-103.912	342.465	253.497	424.713	151.039	-9.54029	336.969	19.6995
731	453039	V. rupestris B38 x 'Horizon'	right	369.299	-41.2098	-389.314	-635.2	149.403	-196.863	-342.521	-132.543	-407.373	-77.9984	-54.4286	296.132	-38.3095	351.516	254.331	395.884	147.633	-2.97909	311.28	43.2614
732	453039	V. rupestris B38 x 'Horizon'	right	344.094	-58.0299	-342.655	-585.456	138.358	-215.117	-342.849	-147.179	-446.381	-82.6341	-54.7534	312.271	-88.325	342.608	320.182	424.589	170.461	-7.76972	301.867	16.7187
733	453040	V. rupestris B38 x 'Horizon'	right	372.304	-90.8152	-322.572	-525.139	158.697	-178.182	-359.7	-133.418	-448.426	-82.987	-111.692	290.789	-127.818	353.122	311.19	402.484	183.774	-18.0446	344.243	-17.8094
734	453040	V. rupestris B38 x 'Horizon'	right	335.258	-62.3516	-308.351	-588.535	150.961	-201.155	-332.958	-139.895	-452.388	-54.5696	-87.9297	313.626	-106.174	387.891	327.457	397.783	165.452	-30.4912	308.672	-22.3026
735	453040	V. rupestris B38 x 'Horizon'	right	369.51	-83.45	-326.08	-540.869	160.716	-206.554	-347.433	-127.962	-430.564	-74.054	-101.668	311.971	-116.211	379.081	273.736	407.802	183.556	-35.9199	334.438	-30.0462
736	453040	V. rupestris B38 x 'Horizon'	right	389.457	-37.2927	-442.892	-532.833	187.049	-186.538	-303.643	-132.314	-386.474	-87.5541	-118.476	253.252	-142.732	319.468	269.064	409.654	194.996	-18.9817	353.652	13.139
737	453040	V. rupestris B38 x 'Horizon'	right	378.036	-84.187	-374.157	-598.153	149.572	-197.972	-319.765	-112.624	-405.999	-50.9679	-104.994	292.485	-116.29	338.843	279.93	412.474	185.168	-18.2311	328.499	18.3324
738	453040	V. rupestris B38 x 'Horizon'	right	371.415	-49.2789	-422.741	-543.45	154.35	-197.277	-317.41	-147.387	-394.403	-138.732	-75.6028	301.115	-103.064	357.966	271.322	414.756	194.878	-13.1981	321.255	15.4849
739	453042	V. rupestris B38 x 'Horizon'	right	273.107	-44.1035	-291.333	-657.102	97.2532	-195.086	-325.626	-147.337	-420.295	-92.5444	-59.5773	352.148	-56.712	408.477	392.603	349.887	120.5	-3.35571	270.08	29.0176
740	453042	V. rupestris B38 x 'Horizon'	right	316.196	-31.2979	-351.528	-641.004	126.547	-206.93	-344.743	-136.814	-407.017	-94.9556	-61.0047	312.914	-50.8712	368.03	348.993	400.797	142.201	-12.5933	281.228	41.8538
741	453042	V. rupestris B38 x 'Horizon'	right	333.889	-55.9553	-386.981	-564.261	139.887	-216.225	-302.869	-175.007	-406.056	-130.63	-79.3174	321.983	-83.5928	392.249	334.548	413.779	165.226	-26.8879	285.265	40.9553
742	453042	V. rupestris B38 x 'Horizon'	right	305.851	-30.5867	-349.345	-623.907	135.945	-224.072	-327.382	-158.184	-417.758	-94.6236	-59.8508	329.847	-58.595	388.901	344.33	392.636	150.813	-17.5447	275.992	37.5342
743	453042	V. rupestris B38 x 'Horizon'	right	306.017	-36.7324	-302.774	-601.898	107.096	-215.559	-323.397	-162.39	-410.377	-112.432	-95.3563	363.421	-91.1959	405.521	413.32	339.866	124.428	-5.28731	272.239	25.4902
744	453042	V. rupestris B38 x 'Horizon'	right	341.006	-56.3405	-358.072	-591.641	144.315	-216.434	-332.811	-165.683	-406.047	-105.562	-81.6938	322.426	-67.3865	368.483	358.749	408.819	115.083	-11.4088	286.858	47.3425
745	453043	V. rupestris B38 x 'Horizon'	right	357.733	-20.5088	-429.807	-598.923	158.863	-195.512	-316.557	-149.294	-394.462	-119.811	-67.2443	281.423	-86.7906	357.785	312.823	391.874	167.206	-1.29327	298.236	54.2602
746	453043	V. rupestris B38 x 'Horizon'	right	378.391	-23.5024	-404.466	-580.196	161.844	-210.595	-320.563	-134.301	-420.886	-101.297	-46.3631	279.731	-97.7192	350.254	282.348	420.114	157.57	-22.7985	309.843	22.5922
747	453043	V. rupestris B38 x 'Horizon'	right	353.123	-11.7818	-363.076	-590.096	133.979	-224.394	-346.071	-131.452	-431.037	-101.379	-68.5547	309.563	-76.3685	349.617	305.091	398.175	172.062	-14.1462	320.851	15.8944
748	453043	V. rupestris B38 x 'Horizon'	right	346.637	-38.519	-366.304	-555.933	139.579	-209.568	-336.227	-173.029	-431.829	-115.318	-69.6996	308.083	-90.1948	373.727	329.395	407.196	171.562	-24.4628	307.081	27.8238
749	453043	V. rupestris B38 x 'Horizon'	right	356.288	-27.906	-411.219	-585.935	167.045	-199.375	-329.129	-166.271	-414.819	-120.081	-52.9213	307.254	-70.7147	357.568	295.779	389.775	155.217	-8.75098	304.472	53.7223
750	453043	V. rupestris B38 x 'Horizon'	right	348.479	-45.3367	-356.647	-574.585	107.827	-211.917	-313.102	-142.399	-445.446	-110.338	-79.5813	316.666	-93.2407	357.758	324.978	407.27	184.534	-15.005	322.198	17.8858
751	453044	V. rupestris B38 x 'Horizon'	right	334.234	-71.1967	-347.126	-612.999	129.337	-187.411	-340.236	-150.256	-436.419	-67.0022	-60.7126	297.68	-96.241	356.455	329.867	403.849	182.597	-9.99964	304.7	40.8808
752	453044	V. rupestris B38 x 'Horizon'	right	342.484	-55.5443	-347.224	-601.205	141.109	-207.567	-345.449	-133.561	-444.28	-84.8508	-82.984	288.363	-80.9043	348.803	350.91	395.193	169.378	-16.5283	296.96	66.8963
753	453044	V. rupestris B38 x 'Horizon'	right	339.119	-79.9801	-376.737	-615.08	170.625	-194.418	-303.62	-129.698	-388.356	-89.441	-112.571	333.557	-111.78	386.395	338.459	367.52	158.114	-17.4874	286.747	38.6334
754	453044	V. rupestris B38 x 'Horizon'	right	370.192	-49.4231	-384.452	-524.724	178.682	-180.658	-358.361	-153.401	-458.892	-112.642	-87.5518	256.251	-96.8203	312.94	326.465	409.399	201.963	-12.3316	308.776	54.589
755	453044	V. rupestris B38 x 'Horizon'	right	335.913	-79.0759	-314.15	-582.525	167.771	-211.968	-353.33	-119.089	-456.941	-102.609	-65.0517	331.539	-78.3037	381.078	317.684	390.445	158.156	-34.1489	288.253	26.3541
756	453044	V. rupestris B38 x 'Horizon'	right	322.993	-82.5206	-341.601	-589.69	158.405	-207.608	-315.1	-154.448	-419.102	-71.8114	-98.379	319.768	-108.289	395.672	342.823	404.775	172.064	-23.778	286.187	9.64005
757	453046	V. rupestris B38 x 'Horizon'	right	362.877	-59.4435	-435.897	-583.941	159.835	-208.359	-272.671	-161.045	-389.19	-78.6831	-73.2108	284.33	-106.911	346.656	283.529	444.166	175.839	-20.4882	295.799	36.8082
758	453046	V. rupestris B38 x 'Horizon'	right	319.929	-53.0757	-383.977	-640.741	163.28	-178.885	-308.528	-164.148	-432.066	-42.0851	-40.212	291.972	-40.7353	319.344	296.06	458.262	144.465	-16.1634	281.784	25.521
759	453046	V. rupestris B38 x 'Horizon'	right	346.519	-86.8149	-272.974	-651.469	175.68	-209.368	-369.872	-71.4133	-454.66	-5.11245	-63.7383	300.281	-66.1135	360.842	273.775	378.838	146.403	-28.4108	284.98	12.6269
760	453046	V. rupestris B38 x 'Horizon'	right	366.752	-53.7847	-423.188	-548.632	164.78	-200.153	-297.999	-154.752	-395.159	-106.627	-99.669	304.507	-112.568	356.298	276.348	412.858	195.764	-36.7904	324.938	27.0762
761	453046	V. rupestris B38 x 'Horizon'	right	308.015	-70.5217	-311.912	-607.316	140.957	-186.22	-312.294	-168.665	-470.792	-66.2642	-68.5807	296.9	-69.7652	368.698	386.79	421.824	123.071	-1.57555	274.511	13.1408
762	453046	V. rupestris B38 x 'Horizon'	right	361.177	-43.608	-468.224	-556.577	170.963	-202.003	-293.208	-132.02	-356.346	-131.702	-88.2482	268.334	-109.022	322.558	288.447	440.824	180.92	-15.6421	313.541	49.8368
763	453047	V. rupestris B38 x 'Horizon'	right	339.465	-58.108	-397.915	-607.645	148.331	-201.284	-315.399	-144.28	-391.907	-95.4238	-82.6145	303.853	-87.1282	354.298	327.979	420.34	167.89	-22.9428	291.3	51.1917
764	453047	V. rupestris B38 x 'Horizon'	right	362.079	-35.6681	-373.276	-604.326	113.705	-207.321	-336.294	-154.913	-428.396	-107.91	-55.3761	285.95	-53.2915	356.141	333.886	408.89	160.365	-12.4407	276.598	71.5979
765	453047	V. rupestris B38 x 'Horizon'	right	362.744	-42.0521	-388.625	-554.547	140.978	-204.037	-329.514	-173.653	-441.276	-123.36	-74.183	292.347	-73.8068	338.965	334.349	409.065	166.918	-9.72955	302.416	67.0023
766	453047	V. rupestris B38 x 'Horizon'	right	353.556	-57.9561	-363.591	-606.434	106.58	-225.938	-323.316	-128.626	-424.884	-104.496	-47.5328	300.162	-84.4831	357.769	322.992	413.473	166.179	-13.1378	294.5	65.1842
767	453047	V. rupestris B38 x 'Horizon'	right	355.155	-40.3586	-411.497	-595.458	144.624	-230.328	-302.918	-121.528	-371.821	-98.7003	-96.0036	293.222	-112.944	354.325	322.204	418.201	177.503	-23.1674	295.699	43.7924
768	453047	V. rupestris B38 x 'Horizon'	right	330.579	-83.7111	-308.876	-611.05	126.776	-220.72	-334.957	-138.614	-430.926	-70.859	-70.7736	325.368	-97.6557	373.388	368.263	397.964	143.571	-17.0806	273.999	45.3145
769	453048	V. rupestris B38 x 'Horizon'	right	249.642	-49.3603	-295.502	-668.588	132.842	-180.394	-342.789	-142.695	-408.339	-115.564	-42.4521	353.033	-28.5053	410.792	404.106	330.365	100.191	-0.652761	230.807	63.0651
770	453048	V. rupestris B38 x 'Horizon'	right	290.247	-65.269	-313.731	-659.845	142.061	-190.692	-335.718	-144.259	-433.493	-78.1713	-49.1998	344.764	-39.5064	395.634	341.219	366.161	131.371	-11.5408	266.75	43.2192
771	453048	V. rupestris B38 x 'Horizon'	right	251.172	-56.6374	-253.22	-631.595	115.487	-190.129	-357.759	-160.086	-447.134	-107.881	-33.1541	359.194	-21.989	430.055	379.137	344.59	125.01	-24.3533	242.45	36.8434
772	453048	V. rupestris B38 x 'Horizon'	right	263.256	-51.8648	-278.064	-696.658	136.047	-173.582	-357.494	-121.754	-426.608	-84.4075	-24.7587	346.825	-11.5073	406.236	356.78	321.349	100.706	2.89563	241.643	50.9605
773	453048	V. rupestris B38 x 'Horizon'	right	308.657	-86.0463	-299.576	-573.5	146.233	-228.344	-345.127	-149.217	-419.795	-101.419	-91.2146	342.608	-92.4613	411.572	367.973	381.198	138.22	-38.0199	287.09	41.1691
774	453048	V. rupestris B38 x 'Horizon'	right	275.325	-94.1496	-228.577	-583.301	149.284	-211.657	-378.16	-135.968	-437.256	-85.6149	-74.3015	355.079	-72.9319	405.749	387.884	383.152	108.412	-20.9896	270.322	-12.2994
775	453049	V. rupestris B38 x 'Horizon'	right	368.182	-41.286	-447.714	-608.422	183.665	-198.611	-307.16	-126.56	-362.031	-107.951	-79.8047	297.128	-95.112	347.669	277.642	387.986	158.683	-5.4188	303.651	55.4652
776	453049	V. rupestris B38 x 'Horizon'	right	380.135	-62.9457	-430.599	-566.76	167.092	-210.182	-315.283	-144.568	-372.659	-92.2569	-101.289	285.29	-103.622	324.588	282.421	425.111	169.039	-5.28764	324.765	47.0108
777	453049	V. rupestris B38 x 'Horizon'	right	326.225	-53.1892	-362.049	-592.659	132.945	-194.519	-346.101	-150.447	-420.963	-133.036	-53.9945	318.623	-63.4554	373.482	336.692	406.354	159.421	-20.4815	291.28	45.8728
778	453049	V. rupestris B38 x 'Horizon'	right	367.352	-38.7131	-434.475	-613.391	182.948	-189.231	-324.999	-135.405	-365.668	-77.6184	-88.4699	279.917	-92.7528	325.292	296.528	405.703	148.694	-12.8688	310.843	56.315
779	453049	V. rupestris B38 x 'Horizon'	right	349.882	-59.4068	-400.834	-565.504	152.206	-199.597	-340.621	-129.625	-382.914	-111.619	-101.932	274.842	-105.76	327.359	339.244	439.51	181.176	-22.4962	309.555	46.5364
780	453049	V. rupestris B38 x 'Horizon'	right	346.574	-55.1888	-400.088	-594.991	162.152	-217.323	-333.497	-152.341	-382.069	-117.94	-78.2147	321.949	-67.3286	377.473	297.904	391.475	163.226	-10.3145	291.341	57.2011
781	453050	V. rupestris B38 x 'Horizon'	right	338.756	-81.9796	-365.724	-611.948	142.742	-210.744	-346.094	-121.781	-388.769	-88.5847	-78.6245	295.995	-85.9677	363.191	323.753	418.062	159.116	-25.0001	300.813	62.7896
782	453050	V. rupestris B38 x 'Horizon'	right	306.565	-58.1188	-356.418	-674.239	161.777	-206.124	-336.053	-116.429	-379.079	-69.7227	-59.5164	323.643	-56.0794	389.282	318.088	384.638	137.671	-17.8134	263.044	44.8846
783	453050	V. rupestris B38 x 'Horizon'	right	301.612	-64.9979	-342.828	-644.924	134.05	-201.613	-343.032	-139.675	-400.907	-86.5532	-64.6886	335.999	-56.3849	378.333	339.007	391.837	160.594	-21.5693	272.577	53.1632
784	453050	V. rupestris B38 x 'Horizon'	right	337.504	-90.2197	-340.8	-532.538	151.071	-200.07	-342.294	-151.53	-449.448	-138.297	-74.5707	317.157	-90.904	369.229	339.656	416.546	165.68	-28.8178	304.105	38.5404
785	453050	V. rupestris B38 x 'Horizon'	right	347.092	-68.2764	-325.529	-580.084	139.729	-214.317	-357.76	-139.229	-446.776	-77.9045	-73.0378	292.946	-84.1458	361.468	327.767	416.774	164.914	-24.3176	307.746	32.9417
786	453050	V. rupestris B38 x 'Horizon'	right	353.351	-44.3956	-372.709	-555.447	142.174	-211.798	-335.084	-148.493	-430.937	-134.238	-74.2346	314.69	-83.4596	357.251	324.504	410.646	166.227	-20.2167	310.168	32.0014
787	453052	V. rupestris B38 x 'Horizon'	right	391.845	-51.776	-410.612	-600.092	169.015	-210.475	-327.671	-115.527	-392.318	-51.4942	-87.3828	261.212	-113.372	314.169	284.252	416.599	193.038	-19.7491	293.205	57.134
788	453052	V. rupestris B38 x 'Horizon'	right	361.113	-44.1834	-400.67	-595.52	165.515	-197.832	-331.436	-153.94	-398.559	-100.817	-87.6221	293.736	-71.0315	370.429	307.163	403.013	168.3	-8.8855	287.227	33.9995
789	453052	V. rupestris B38 x 'Horizon'	right	363.785	-60.9355	-384.901	-638.941	184.793	-202.612	-315.847	-103.493	-386.65	-54.1762	-92.0739	305.698	-90.7491	370.641	280.702	392.129	155.773	-32.756	285.169	24.4452
790	453052	V. rupestris B38 x 'Horizon'	right	339.7	-56.8666	-388.539	-630.687	148.362	-188.109	-307.145	-134.059	-384.87	-96.4717	-81.4485	319.424	-95.1111	379.31	338.04	393.613	156.904	-22.8122	274.107	36.6578
791	453052	V. rupestris B38 x 'Horizon'	right	345.129	-76.5547	-314.825	-627.145	128.117	-219.191	-333.514	-122.603	-412.647	-49.9795	-93.8819	323.698	-86.9644	373.623	338.913	403.511	142.81	-24.5766	286.863	19.2181
792	453052	V. rupestris B38 x 'Horizon'	right	343.702	-55.1408	-343.476	-625.617	145.084	-199.979	-333.461	-117.948	-415.809	-60.8341	-105.392	300.955	-101.471	366.653	349.797	386.83	173.529	-17.4306	287.497	22.5117
793	453053	V. rupestris B38 x 'Horizon'	right	287.63	-63.3197	-332.409	-652.425	168.944	-193.572	-320.833	-135.759	-440.354	-80.7831	-38.4173	326.01	-46.1955	405.399	318.953	389.237	136.353	-11.4554	266.328	16.668
794	453053	V. rupestris B38 x 'Horizon'	right	280.232	-57.2497	-301.715	-673.364	145.198	-193.283	-341.347	-132.584	-446.175	-55.2915	-20.4562	328.906	-20.9175	392.642	307.747	394.901	147.561	-21.289	249.872	16.613
795	453053	V. rupestris B38 x 'Horizon'	right	253.097	-58.548	-220.461	-662.865	126.85	-183.596	-375.058	-104.921	-460.644	-63.5779	-44.3184	317.973	-32.8714	404.414	390.538	353.415	119.848	-9.85871	243.019	7.56462
796	453053	V. rupestris B38 x 'Horizon'	right	313.275	-89.6608	-279.553	-614.908	152.425	-227.137	-325.819	-104.72	-423.565	-51.7197	-98.4657	325.553	-101.787	401.756	360.695	403.952	126.871	-27.2767	275.925	-15.8392
797	453053	V. rupestris B38 x 'Horizon'	right	319.763	-66.9291	-330.113	-606.041	151.378	-193.787	-336.431	-157.863	-449.657	-102.457	-63.1631	311.56	-67.3935	401.425	354.238	378.089	144.067	0.777653	277.311	35.2242
798	453053	V. rupestris B38 x 'Horizon'	right	320.616	-81.3779	-268.134	-588.112	126.394	-242.598	-339.38	-146.167	-438.675	-69.9737	-72.0487	356.924	-78.6893	412.695	343.197	395.192	154.836	-42.3476	251.884	5.76632
799	453054	V. rupestris B38 x 'Horizon'	right	312.115	-38.3849	-314.743	-598.93	109.031	-183.36	-352.839	-161.475	-454.771	-128.587	-50.1162	318.161	-44.5104	387.213	370.717	388.713	144.967	-7.38173	280.15	24.0318
800	453054	V. rupestris B38 x 'Horizon'	right	332.085	-75.4298	-326.829	-598.179	144.42	-216.701	-314.817	-148.118	-422.809	-62.3594	-97.8188	309.248	-98.4648	372.242	367.507	418.983	112.027	-13.8943	304.699	14.2091
801	453054	V. rupestris B38 x 'Horizon'	right	321.705	-64.2148	-350.116	-517.553	122.149	-211.932	-308.418	-206.03	-437.602	-145.091	-72.8222	338.012	-77.4907	388.101	351.049	428.043	157.761	-27.8484	293.785	18.5126
802	453054	V. rupestris B38 x 'Horizon'	right	311.761	-65.7362	-277.237	-615.027	139.282	-189.578	-372.596	-152.824	-467.634	-73.2815	-46.272	327.53	-36.2675	374.279	344.283	393	123.631	-18.0381	281.05	19.6752
803	453054	V. rupestris B38 x 'Horizon'	right	347.524	-84.3008	-282.232	-591.408	139.827	-236.374	-353.171	-103.577	-447.45	-44.5262	-82.2211	301.379	-86.7721	375.903	301.292	421.278	151.229	-23.6173	311.975	-14.7561
804	453054	V. rupestris B38 x 'Horizon'	right	299.787	-62.5425	-244.44	-546.889	114.6	-212.364	-360.844	-197.162	-477.384	-96.4841	-59.7424	347.021	-46.0882	416.074	359.228	388.273	137.942	-19.9538	276.941	-15.9735
805	453056	V. rupestris B38 x 'Horizon'	right	311.69	-24.7741	-342.244	-641.097	141.207	-174.036	-355.919	-149.196	-418.911	-110.06	-63.2642	329.662	-71.9737	393.853	369.683	313.034	171.669	3.91121	258.064	58.7025
806	453056	V. rupestris B38 x 'Horizon'	right	335.392	-36.1814	-374.914	-604.472	174.396	-177.866	-342.811	-158.655	-433.182	-103.037	-71.8257	298.78	-67.6218	352.921	351.265	384.081	128.127	-7.51855	301.175	51.9476
807	453056	V. rupestris B38 x 'Horizon'	right	337.22	-39.0652	-407.791	-584.556	151.697	-197.469	-297.383	-167.474	-411.152	-166.764	-65.7955	346.948	-41.5083	392.444	314.259	372.882	162.234	-20.7693	258.22	63.8235
808	453056	V. rupestris B38 x 'Horizon'	right	357.911	-29.7941	-382.519	-597.635	129.914	-208.392	-315.508	-141.122	-432.486	-102.884	-79.1066	298.861	-91.233	342.963	346.301	394.154	174.91	-15.2903	291.816	59.1395
809	453056	V. rupestris B38 x 'Horizon'	right	345.472	-17.0905	-420.488	-607.37	172.558	-188.704	-302.198	-146.356	-432.681	-122.553	-56.9614	307.735	-64.5102	366.323	286.871	373.335	189.541	-7.21581	282.398	41.8961
810	453056	V. rupestris B38 x 'Horizon'	right	286.52	-47.6608	-313.068	-698.94	134.992	-163.338	-350.47	-136.325	-434.797	-72.1377	-23.1871	323.473	-13.3679	378.071	348.772	344.486	126.291	6.80385	238.315	65.5674
811	453057	V. rupestris B38 x 'Horizon'	right	289.022	-89.0188	-263.45	-665.151	99.6107	-234.544	-332.082	-113.715	-434.491	-54.2221	-26.892	337.724	-28.0734	421.747	306.106	393.219	149.931	-30.1496	240.319	34.1105
812	453057	V. rupestris B38 x 'Horizon'	right	337.761	-53.4864	-392.393	-627.388	171.32	-214.63	-306.679	-139.317	-399.634	-62.0405	-78.3082	305.487	-88.5425	369.139	300.135	405.86	176.53	-19.1359	279.81	35.512
813	453057	V. rupestris B38 x 'Horizon'	right	272.955	-42.2492	-305.027	-693.895	117.375	-186.625	-343.423	-135.379	-419.106	-84.0053	-19.9594	325.811	-9.58276	397.109	361.751	362.489	116.259	-4.09134	228.757	60.8352
814	453057	V. rupestris B38 x 'Horizon'	right	368.521	-94.6607	-384.823	-517.633	160.628	-215.971	-299.766	-155.816	-413.195	-104.212	-116.427	297.384	-110.442	350.071	308.202	447.438	160.506	-32.8331	326.796	26.2328
815	453057	V. rupestris B38 x 'Horizon'	right	351.458	-50.701	-380.011	-620.328	112.86	-192.016	-315.923	-145.916	-398.253	-81.9671	-68.8554	300.917	-116.865	343.637	358.012	404.402	168.28	-7.64753	289.298	49.6185
816	453057	V. rupestris B38 x 'Horizon'	right	325.489	-77.8419	-302.54	-632.817	147.728	-208.145	-340.907	-148.935	-445.887	-60.7623	-59.9775	335.296	-50.0936	402.352	321.009	376.869	144.861	-14.3128	260.319	28.2978
817	453058	V. rupestris B38 x 'Horizon'	right	298.311	-83.6598	-321.459	-564.359	152.233	-201.845	-345.439	-186.374	-430.849	-147.859	-40.941	347.106	-44.1697	418.149	353.283	397.897	123.819	-20.6268	255.211	41.571
818	453058	V. rupestris B38 x 'Horizon'	right	375.713	-44.0486	-453.922	-563.872	221.12	-171.674	-292.226	-126.388	-371.712	-86.1216	-122.692	273.086	-140.991	338.343	274.663	383.359	175.902	-21.9614	334.145	19.2779
819	453058	V. rupestris B38 x 'Horizon'	right	328.248	-54.1479	-320.024	-610.945	142.339	-178.12	-371.087	-141.099	-454.699	-92.5146	-55.7685	320.234	-58.6599	360.984	332.167	386.432	167.381	-14.4019	290.103	23.5788
820	453058	V. rupestris B38 x 'Horizon'	right	355.389	-65.8397	-365.752	-591.153	202.869	-187.93	-330.673	-102.18	-414.014	-59.2458	-112.367	284.419	-129.317	363.759	308.359	394.889	171.918	-32.845	313.588	-3.87408
821	453058	V. rupestris B38 x 'Horizon'	right	341.99	-42.2266	-369.84	-587.669	150.123	-185.171	-342.287	-163.439	-430.59	-94.452	-80.1529	317.119	-79.025	361.366	311.72	392.764	192.562	-15.74	305.5	17.449
822	453058	V. rupestris B38 x 'Horizon'	right	355.705	-30.0557	-427.425	-522.468	169.819	-185.252	-298.388	-210.026	-416.427	-127.882	-94.5608	301.471	-106.745	372.032	314.49	381.561	198.955	-24.4404	304.577	45.0614
823	453059	V. rupestris B38 x 'Horizon'	right	297.18	-71.9307	-296.495	-609.892	129.902	-240.316	-326.036	-146.306	-410.227	-83.9882	-71.3023	345.719	-68.0254	418.975	359.481	410.246	132.08	-30.3899	253.442	7.88313
824	453059	V. rupestris B38 x 'Horizon'	right	338.172	-52.4836	-364.52	-630.297	172.715	-200.101	-347.889	-142.814	-408.634	-85.7114	-51.2831	317.358	-53.1985	374.107	313.959	397.528	138.595	-30.8135	262.084	53.2272
825	453059	V. rupestris B38 x 'Horizon'	right	352.97	-123.593	-255.94	-585.768	153.565	-234.547	-359.621	-84.6904	-393.232	4.83529	-114.813	322.504	-121.1	371.897	278.446	423.159	145.512	-51.6682	314.214	-42.1281
826	453059	V. rupestris B38 x 'Horizon'	right	308.475	-58.177	-277.599	-636.626	133.079	-213.242	-382.358	-140.745	-428.005	-39.3263	-62.3807	323.069	-52.6684	367.646	344.626	399.349	139.385	-12.1506	277.446	10.2034
827	453059	V. rupestris B38 x 'Horizon'	right	322.824	-72.753	-306.336	-583.487	107.018	-217.523	-344.076	-180.814	-423.153	-100.801	-69.7783	342.642	-57.6289	417.273	345.226	394.443	161.264	-34.1144	264.64	35.134
828	453059	V. rupestris B38 x 'Horizon'	right	370.018	-64.621	-366.737	-599.687	156.058	-221.7	-323.751	-125.088	-379.548	-58.6531	-112.289	291.869	-103.388	353.094	337.016	432.774	130.547	-30.6444	292.076	22.6563
829	453060	V. rupestris B38 x 'Horizon'	right	328.285	-65.9035	-323.764	-624.645	126.213	-205.792	-353.18	-131.113	-412.012	-110.028	-63.6883	337.236	-58.0982	391.374	349.859	382.175	143.689	-17.7906	262.696	44.4878
830	453060	V. rupestris B38 x 'Horizon'	right	349.074	-90.9296	-314.998	-565.756	149.279	-224.543	-350.833	-125.271	-441.501	-87.8442	-78.9452	316.196	-91.7046	364.19	326.354	427.144	162.123	-34.7719	291.153	21.5852
831	453060	V. rupestris B38 x 'Horizon'	right	353.882	-93.6966	-385.788	-562.939	183.749	-214.838	-323.075	-147.239	-386.299	-95.3693	-100.231	308.287	-105.077	360.653	317.227	433.625	151.652	-14.4974	293.96	26.0161
832	453060	V. rupestris B38 x 'Horizon'	right	350.602	-77.9151	-356.691	-592.388	135.354	-236.76	-314.651	-137.118	-411.664	-95.7922	-80.378	342.008	-88.7553	376.513	308.713	402.964	175.043	-22.1497	282.428	40.6387
833	453060	V. rupestris B38 x 'Horizon'	right	345.471	-72.1741	-310.856	-621.15	149.287	-206.984	-347.092	-93.2976	-432.139	-62.1557	-92.8909	308.078	-105.613	357.882	355.179	390.134	150.672	-20.1446	287.982	19.812
834	453060	V. rupestris B38 x 'Horizon'	right	348.303	-92.7321	-326.876	-574.193	167.458	-209.76	-352.694	-135.239	-413.633	-59.1958	-87.5474	312.393	-97.8089	357.793	320.591	444.317	153.152	-55.2893	289.056	11.9064
835	453061	V. rupestris B38 x 'Horizon'	right	331.898	-56.002	-330.512	-575.296	124.965	-208.253	-317.029	-173.846	-468.384	-114.402	-58.3275	327.424	-64.8687	396.145	339.494	392.828	159.855	-18.555	282.91	29.9578
836	453061	V. rupestris B38 x 'Horizon'	right	362.578	-52.6111	-427.436	-570.483	107.463	-241.281	-214.22	-161.239	-410.445	-76.2486	-83.559	278.63	-114.948	344.06	299.602	455.341	167.341	-23.9614	313.623	47.7918
837	453061	V. rupestris B38 x 'Horizon'	right	313.189	-67.1837	-329.631	-632.289	134.207	-202.664	-310.985	-160.171	-436.712	-83.5071	-49.8	341.267	-64.5165	404.561	333.332	385.229	138.946	-4.11356	271.97	18.8715
838	453061	V. rupestris B38 x 'Horizon'	right	368.977	-44.4697	-381.582	-575.861	160.177	-207.339	-329.053	-163.708	-461.26	-74.0276	-53.0043	267.541	-79.4761	343.394	291.227	412.764	183.198	-13.8487	300.796	55.5554
839	453061	V. rupestris B38 x 'Horizon'	right	357.951	-64.6196	-343.667	-607.738	130.565	-201.291	-293.97	-168.577	-462.259	-38.4253	-81.7964	304.027	-85.826	363.659	314.392	402.684	155.635	-7.15479	308.976	17.4343
840	453061	V. rupestris B38 x 'Horizon'	right	353.646	-79.9477	-337.445	-585.53	159.194	-196.013	-328.183	-133.213	-430.364	-60.7867	-115.195	294.878	-115.975	353.364	355.673	405.284	140.877	-14.5787	317.772	16.5422
841	453062	V. rupestris B38 x 'Horizon'	right	303.212	-48.5706	-349.251	-667.907	131.866	-209.22	-332.32	-140.853	-392.613	-79.9844	-44.8318	338.358	-46.4877	391.052	322.942	379.497	142.045	-15.1322	265.438	52.7608
842	453062	V. rupestris B38 x 'Horizon'	right	291.668	-51.9393	-246.565	-661.752	113.523	-236.473	-390.464	-118.779	-438.548	-42.0148	-36.0435	332.986	-29.0059	374.062	342.315	358.559	133.311	-14.6022	259.809	59.9533
843	453062	V. rupestris B38 x 'Horizon'	right	328.927	-72.4338	-320.663	-623.073	133.377	-246.145	-344.761	-117.286	-402.189	-73.4557	-85.2938	329.501	-72.5294	376.129	339.347	399.859	144.189	-23.5549	279.596	50.4588
844	453062	V. rupestris B38 x 'Horizon'	right	329.783	-39.5289	-319.457	-605.437	130.017	-227.311	-360.443	-161.428	-423.659	-82.7325	-67.0846	331.597	-56.026	382.238	337.284	391.035	142.004	-17.2969	287.581	28.8646
845	453062	V. rupestris B38 x 'Horizon'	right	319.644	-52.5928	-287.927	-624.347	118.217	-230.559	-381.329	-163.273	-440.068	-98.5658	-20.3432	341.721	-16.2277	389.042	337.858	348.711	121.615	0.389181	248.561	89.4746
846	453062	V. rupestris B38 x 'Horizon'	right	320.17	-72.5351	-294.955	-586.309	155.76	-228.735	-359.587	-146.545	-441.089	-96.1623	-73.114	330.799	-62.8623	394.355	361.346	390.392	123.135	-20.919	271.195	35.6589
847	453063	V. rupestris B38 x 'Horizon'	right	356.568	-92.9258	-310.455	-571.69	156.313	-176.325	-357.328	-115.423	-466.025	-77.4737	-76.9974	291.141	-100.097	349.85	327.331	421.578	164.447	-31.517	306.245	2.78539
848	453063	V. rupestris B38 x 'Horizon'	right	367.263	-22.1822	-419.747	-583.304	139.667	-186.552	-322.988	-174.409	-432.265	-101.076	-51.8385	276.955	-65.5707	331.398	280.37	408.539	198.779	-2.34583	306.329	52.9764
849	453063	V. rupestris B38 x 'Horizon'	right	439.132	-68.1848	-433.452	-411.924	206.022	-189.419	-282.459	-138.256	-401.633	-57.8031	-135.229	181.111	-184.877	258.213	241.674	452.682	196.351	-44.8707	354.472	18.452
850	453063	V. rupestris B38 x 'Horizon'	right	320.879	-42.3803	-428.052	-670.095	158.425	-166.456	-309.728	-126.167	-346.268	-100.385	-58.9754	300.55	-80.4663	381.631	309.591	374.474	165.038	-3.93012	269.557	52.759
851	453063	V. rupestris B38 x 'Horizon'	right	353.674	-70.9024	-443.168	-633.247	156.196	-170.346	-260.251	-105.653	-339.277	-86.5508	-101.62	294.935	-114.249	365.683	276.027	412.889	153.592	-14.7375	319.077	7.92903
852	453063	V. rupestris B38 x 'Horizon'	right	335.437	-85.4937	-310.83	-594.036	144.409	-193.298	-297.357	-161.164	-490.845	-52.8654	-53.5992	320.585	-82.4216	388.675	312.329	410.653	170.304	-40.2021	272.573	7.14485
853	453064	V. rupestris B38 x 'Horizon'	right	292.752	-44.5407	-343.965	-610.353	152.668	-197.711	-344.558	-154.385	-410.176	-118.975	-67.2312	357.776	-71.5722	396.834	344.528	367.163	169.443	-16.5961	278.111	20.7872
854	453064	V. rupestris B38 x 'Horizon'	right	321.212	-48.269	-311.581	-601.703	157.042	-192.95	-356.53	-142.174	-437.862	-98.7675	-82.2235	331.826	-71.3033	388.318	360.485	372.347	122.654	-13.3225	298.107	4.69641
855	453064	V. rupestris B38 x 'Horizon'	right	341.636	-42.2227	-393.624	-627.554	186.792	-184.405	-326.163	-129.796	-398.343	-91.3901	-83.9491	316.856	-92.4805	352.548	327.447	372.849	135.327	3.04925	303.357	30.0665
856	453064	V. rupestris B38 x 'Horizon'	right	306.055	-19.6575	-328.343	-597.505	122.621	-190.457	-357.017	-168.953	-426.205	-133.328	-61.1403	323.254	-68.7147	396.119	394.917	358.985	143.802	-5.07876	274.025	36.6215
857	453064	V. rupestris B38 x 'Horizon'	right	336.562	-58.8386	-345.358	-647.255	156.681	-199.91	-342.53	-124.767	-404.291	-55.9631	-72.3651	316.315	-89.619	369.699	332.811	383.773	149.593	-15.6007	278.517	32.5473
858	453064	V. rupestris B38 x 'Horizon'	right	297.584	-62.6678	-313.709	-619.809	125.279	-170.486	-336.914	-134.179	-421.193	-130.366	-71.264	343.454	-75.6167	398.046	397.905	369.616	130.933	-12.9028	266.996	19.295
859	453065	V. rupestris B38 x 'Horizon'	right	296.532	-76.1171	-259.738	-536.045	117.272	-199.096	-332.69	-212.839	-502.063	-91.5091	-58.6816	327.515	-68.7319	364.993	414.292	406.638	121.339	-10.9839	272.469	27.4426
860	453065	V. rupestris B38 x 'Horizon'	right	348.1	-67.6912	-379.909	-575.732	166.121	-209.127	-316.412	-142.33	-390.566	-96.4438	-108.156	304.043	-115.004	359.656	349.136	414.475	126.552	-11.9069	320.137	25.0573
861	453065	V. rupestris B38 x 'Horizon'	right	315.244	-78.5551	-312.421	-552.507	158.987	-221.755	-354.465	-167.495	-445.57	-99.7794	-60.6818	324.13	-64.9642	382.549	333.574	438.021	147.664	-39.0171	282.633	14.4081
862	453065	V. rupestris B38 x 'Horizon'	right	332.566	-58.7405	-290.462	-592.702	108.402	-230.67	-366.483	-149.073	-442.541	-94.2952	-61.9186	337.186	-46.9216	386.992	333.083	394.333	151.429	-24.8003	282.846	31.7688
863	453065	V. rupestris B38 x 'Horizon'	right	338.795	-57.2957	-341.768	-588.577	140.034	-199.084	-323.821	-170.958	-438.828	-82.7708	-92.6508	299.322	-88.032	372.712	380.291	397.583	136.576	-16.697	289.403	45.7657
864	453065	V. rupestris B38 x 'Horizon'	right	292.988	-84.8696	-272.006	-596.579	157.762	-192.261	-344.602	-124.205	-435.231	-95.5721	-86.0392	334.564	-86.1165	403.964	401.734	396.342	118.485	-30.58	253.024	-10.8035
865	453067	V. rupestris B38 x 'Horizon'	right	361.475	-47.6682	-386.082	-580.912	156.439	-217.072	-328.728	-158.536	-418.297	-80.2749	-100.096	308.254	-69.2547	334.493	308.116	417.02	180.537	-24.1479	295.892	48.8439
866	453067	V. rupestris B38 x 'Horizon'	right	358.674	-51.9106	-344.032	-588.444	135.157	-208.181	-338.576	-139.229	-434.524	-107.312	-87.4659	329.544	-74.2548	362.631	333.482	387.803	142.755	-13.011	308.785	28.1095
867	453067	V. rupestris B38 x 'Horizon'	right	353.098	-45.0567	-409.544	-554.569	156.462	-207.427	-327.611	-178.149	-400.891	-130.612	-80.0768	312.365	-79.4262	351.423	316.945	405.988	159.477	-15.8444	311.567	61.8815
868	453067	V. rupestris B38 x 'Horizon'	right	332.509	-76.5576	-339.467	-601.015	133.632	-215.855	-334.909	-135.753	-411.214	-105.03	-75.0276	325.359	-87.4582	392.413	344.939	399.28	158.559	-22.4641	278.437	39.6225
869	453067	V. rupestris B38 x 'Horizon'	right	348.899	-83.8156	-324.143	-576.085	104.915	-218.838	-347.2	-154.458	-418.291	-118.575	-68.319	333.484	-79.4388	381.125	350.756	405.862	156.036	-12.2001	276.785	43.5018
870	453067	V. rupestris B38 x 'Horizon'	right	316.612	-55.6278	-309.568	-632.405	112.506	-221.617	-355.401	-140.85	-422.651	-105.72	-35.3149	334.171	-35.5525	399.057	342.656	382.661	129.929	-22.3322	256.785	62.6618
871	453068	V. rupestris B38 x 'Horizon'	right	280.515	-49.9158	-300.619	-630.547	141.496	-184.322	-329.539	-135.72	-441.194	-90.4084	-68.3514	320.949	-94.4933	396.233	415.953	365.138	140.355	-14.5954	255.877	23.1877
872	453068	V. rupestris B38 x 'Horizon'	right	311.058	-48.83	-382.718	-661.614	199.936	-194.186	-307.135	-129.383	-400.299	-79.9341	-58.5942	331.12	-70.3878	398.115	309.879	354.293	139.973	-17.2134	258.288	47.634
873	453063	V. rupestris B38 x 'Horizon'	right	311.768	-54.1336	-368.104	-624.768	147.189	-173.663	-307.055	-171.497	-440.668	-105.049	-58.1157	317.168	-58.073	382.595	355.984	386.063	151.969	-10.1001	265.105	53.383
874	453068	V. rupestris B38 x 'Horizon'	right	320.094	-34.5873	-382.178	-647.453	156.717	-190.486	-308.131	-123.393	-416.547	-88.1506	-73.9894	294.326	-76.3253	359.631	350.768	397.02	144.196	1.07572	285.395	32.0174
875	453068	V. rupestris B38 x 'Horizon'	right	272.413	-52.7079	-267.104	-658.895	125.911	-210.706	-339.641	-159.715	-438.013	-88.8373	-24.2165	355.314	2.16149	426.168	358.268	344.687	75.1535	-4.0873	235.067	48.7795
876	453068	V. rupestris B38 x 'Horizon'	right	327.099	-44.4874	-361.708	-582.576	146.57	-213.867	-322.171	-187.383	-403.555	-144.374	-76.1692	345.571	-58.4606	418.138	360.929	352.812	122.548	-1.40319	264.917	57.5695
877	453069	V. rupestris B38 x 'Horizon'	right	365.853	-48.0364	-353.956	-610.651	155.966	-198.032	-350.966	-140.499	-443.132	-78.3417	-65.1243	322.025	-42.6298	346.715	281.153	396.838	159.529	-20.5413	293.306	30.5243
878	453069	V. rupestris B38 x 'Horizon'	right	363.978	-53.4738	-399.765	-606.353	175.843	-217.144	-325.749	-129.223	-376.638	-60.2544	-93.353	287.241	-100.897	345.585	303.137	423.568	163.01	-31.3313	290.434	41.3858
879	453069	V. rupestris B38 x 'Horizon'	right	313.512	-59.0401	-334.999	-602.657	160.359	-194.744	-341.674	-164.822	-403.742	-85.272	-101.983	324.499	-88.7615	380.213	393.61	386.581	127.035	-12.1677	276.643	27.4096
880	453069	V. rupestris B38 x 'Horizon'	right	316.944	-58.6743	-351.827	-647.219	157.549	-210.148	-329.118	-159.984	-392.427	-44.7269	-69.2948	342.383	-49.1784	363.865	312.332	417.621	139.478	-25.3064	265.543	22.1897
881	453069	V. rupestris B38 x 'Horizon'	right	351.074	-83.0576	-339.782	-572.242	159.487	-209.034	-325.248	-139.734	-457.181	-113.132	-68.6893	339.443	-71.7545	386.178	297.989	392.801	167.392	-28.4176	286.713	27.1937
882	453069	V. rupestris B38 x 'Horizon'	right	364.327	-89.6983	-337.891	-593.365	187.374	-212.62	-338.039	-135.098	-427.739	-55.0798	-86.1931	312.882	-80.0856	371.523	291.254	412.642	130.423	-15.1798	296.57	3.99337
883	453070	V. rupestris B38 x 'Horizon'	right	355.959	-43.6673	-404.648	-563.779	152.467	-224.06	-314.182	-143.645	-418.814	-124.557	-57.9715	285.791	-53.4266	350.645	282.018	460.248	172.892	-26.3435	285.705	29.3673
884	453070	V. rupestris B38 x 'Horizon'	right	345.551	-86.5379	-365.275	-575.767	163.223	-219.942	-310.181	-139.956	-394.455	-84.6182	-81.2218	321.142	-103.01	389.18	289.69	441.076	159.567	-29.5333	296.111	-15.0437
885	453070	V. rupestris B38 x 'Horizon'	right	340.093	-67.6311	-402.832	-610.121	181.313	-196.04	-303.328	-141.122	-395.99	-50.1707	-81.3549	291.771	-74.2569	373.792	232.123	429.017	195.391	-26.47	308.842	-3.02537
886	453070	V. rupestris B38 x 'Horizon'	right	358.96	-92.5938	-290.705	-439.376	152.213	-247.872	-355.795	-186.919	-458.829	-138.151	-87.2679	324.274	-95.847	389.999	327.39	421.077	153.116	-36.1635	296.764	5.72554
887	453070	V. rupestris B38 x 'Horizon'	right	367.339	-94.1089	-420.468	-565.231	170.601	-203.743	-282.163	-137.588	-354.602	-97.942	-87.0989	308.22	-138.9	368.318	286.514	442.916	167.517	-23.4253	291.261	2.58474
888	453070	V. rupestris B38 x 'Horizon'	right	313.953	-77.9394	-321.48	-580.443	165.04	-197.853	-342.514	-156.955	-440.431	-92.3968	-74.7377	336.303	-96.1743	381.302	361.845	397.481	167.622	-35.0154	266.877	25.5176
889	453071	V. rupestris B38 x 'Horizon'	right	285.698	-46.2375	-322.147	-665.867	110.024	-157.241	-319.288	-129.113	-430.47	-137.268	-34.9641	346.314	-44.7078	411.425	371.115	330.144	121.082	13.7247	263.659	34.1181
890	453071	V. rupestris B38 x 'Horizon'	right	355.103	-59.0928	-384.156	-612.556	163.9	-188.841	-317.017	-173.793	-427.65	-82.5402	-35.5915	293.28	-54.4594	399.926	275.657	405.191	152.711	-19.4437	271.503	37.8696
891	453071	V. rupestris B38 x 'Horizon'	right	347.471	-52.4486	-454.826	-556.571	183.783	-193.326	-255.618	-183.396	-390.719	-98.947	-90.0334	282.846	-109.696	355.095	294.7	435.447	163.838	-16.7963	311.101	28.0972
892	453071	V. rupestris B38 x 'Horizon'	right	321.557	-43.2544	-368.336	-648.807	177.122	-174.39	-322.586	-141.086	-426.983	-79.1975	-54.6016	313.129	-72.7303	377.745	330.31	376.096	140.837	-4.09785	275.411	23.8623
893	453071	V. rupestris B38 x 'Horizon'	right	338.501	-33.5475	-350.384	-645.159	167.083	-195.49	-316.079	-130.022	-459.493	-48.1597	-50.3229	287.848	-66.7696	387.975	293.431	380.317	159.512	-27.3537	284.52	23.592
894	453071	V. rupestris B38 x 'Horizon'	right	323.747	-20.2669	-430.713	-616.845	184.699	-171.884	-300.882	-152.73	-384.926	-123.732	-71.1931	300.964	-95.2646	388.689	332.48	365.456	162.927	-13.8933	279.125	44.2434
895	453072	V. rupestris B38 x 'Horizon'	right	396.744	-25.1271	-471.742	-555.767	185.238	-187.033	-291.25	-151.273	-396.994	-135.966	-73.9333	268.347	-96.6232	323.586	282.419	389.131	159.557	-2.74169	306.585	76.8443
896	453072	V. rupestris B38 x 'Horizon'	right	349.181	-38.2245	-426.278	-608.106	156.413	-184.251	-331.314	-158.228	-402.545	-111.464	-48.2953	290.984	-59.9432	339.166	287.417	401.361	181.196	-7.54583	294.168	76.3089
897	453072	V. rupestris B38 x 'Horizon'	right	371.906	-38.5705	-395.72	-591.097	146.816	-202.724	-326.987	-149.086	-428.541	-84.2205	-71.9732	281.135	-86.4298	327.549	310.943	410.932	171.641	-11.5186	308.344	57.6005
898	453072	V. rupestris B38 x 'Horizon'	right	337.547	-33.5525	-346.395	-650.538	103.373	-197.089	-344.478	-137	-431.775	-90.9929	-50.4085	309.873	-43.0107	374.262	320.929	364.589	176.731	-1.16488	277.486	61.6128
899	453072	V. rupestris B38 x 'Horizon'	right	387.995	-49.5888	-395.391	-556.551	134.079	-208.111	-328.624	-150.919	-398.946	-95.1652	-107.337	272.048	-111.309	318.754	346.535	423.614	159.115	-10.9892	313.883	56.9085
900	453072	V. rupestris B38 x 'Horizon'	right	322.461	-41.1443	-362.689	-641.447	136.424	-185.594	-335.258	-150.971	-414.432	-86.1359	-76.9048	318.157	-72.4953	362.936	356.354	366.615	163.551	5.11032	282.988	52.4746
901	453073	V. rupestris B38 x 'Horizon'	right	354.315	-83.6931	-326.415	-574.396	151.19	-234.87	-343.868	-142.848	-422.241	-67.0365	-72.7569	325.625	-67.1865	377.127	273.673	438.056	150.536	-40.8109	302.753	2.84581
902	453073	V. rupestris B38 x 'Horizon'	right	372.401	-93.8993	-366.051	-548.879	174.311	-229.177	-323.504	-117.783	-398.184	-65.3661	-113.03	291.447	-113.209	349.689	265.091	438.214	146.721	-23.7615	355.455	-0.48451
903	453073	V. rupestris B38 x 'Horizon'	right	369.853	-53.8771	-372.826	-554.685	149.775	-228.003	-347.629	-152.324	-416.676	-104.181	-77.3794	299.794	-76.7723	358.966	293.227	422.638	169.065	-31.0933	309.363	42.7643
904	453073	V. rupestris B38 x 'Horizon'	right	357.343	-57.3801	-378.003	-620.57	159.065	-209.793	-345.438	-140.706	-397.989	-55.6307	-80.2921	299.932	-78.5631	347.637	289.467	401.847	167.345	-9.2457	307.065	43.9103
905	453073	V. rupestris B38 x 'Horizon'	right	333.488	-66.1589	-317.646	-620.552	141.655	-213.757	-352.306	-129.229	-432.401	-68.3257	-93.295	323.273	-72.2374	373.881	336.939	373.295	160.013	-12.1435	295.789	39.7172
906	453073	V. rupestris B38 x 'Horizon'	right	336.039	-70.7586	-316.855	-530.474	128.626	-213.599	-352.18	-168.309	-442.039	-125.382	-94.257	329.61	-89.0167	390.686	351.357	394.941	182.691	-29.6224	295.634	22.9092
907	453074	V. rupestris B38 x 'Horizon'	right	312.189	-58.2758	-337.564	-623.661	160.93	-176.949	-328.551	-166.744	-456.711	-69.5465	-73.6061	317.634	-71.6865	385.162	341.046	360.177	155.443	-6.38002	298.511	38.583
908	453074	V. rupestris B38 x 'Horizon'	right	336.921	-65.2493	-412.291	-543.078	177.228	-189.559	-333.018	-208.277	-378.511	-124.066	-88.7261	308.688	-88.6636	364.795	337.452	411.661	156.383	-14.201	293.226	59.2871
909	453074	V. rupestris B38 x 'Horizon'	right	307.451	-68.1469	-320.717	-640.417	136.069	-206.404	-275.585	-160.329	-481.522	-44.6379	-70.2861	326.977	-58.1278	389.583	335.387	375.644	151.188	-19.5509	276.143	47.2811
910	453074	V. rupestris B38 x 'Horizon'	right	337.927	-33.2808	-408.697	-556.712	179	-196.485	-290.666	-202.272	-449.964	-99.6995	-91.0583	295.393	-78.2425	349.712	334.46	397.61	161.216	-12.6144	306.025	58.3491
911	453074	V. rupestris B38 x 'Horizon'	right	304.44	-46.0447	-340.301	-642.686	141.314	-182.718	-308.363	-156.491	-442.974	-87.5174	-76.6047	341.534	-65.1677	403.04	348.062	336.406	158.346	-7.83304	281.249	42.3111
912	453074	V. rupestris B38 x 'Horizon'	right	332.124	-77.2908	-348.168	-538.881	187.135	-198.417	-328.178	-178.538	-443.785	-88.6528	-115.921	308.78	-109.903	365.81	366.006	398.24	163.809	-21.9687	296.882	30.9197
913	453075	V. rupestris B38 x 'Horizon'	right	309.944	-75.5663	-330.614	-643.876	130.268	-213.11	-319.413	-127.565	-401.305	-80.6103	-80.8402	330.388	-76.2783	388.58	360.848	391.843	123.166	-6.8781	284.223	36.7938
914	453075	V. rupestris B38 x 'Horizon'	right	341.881	-63.0457	-327.285	-629.246	169.559	-217.764	-343.071	-117.184	-415.601	-52.1166	-101.849	323.77	-88.3439	370.649	335.481	371.533	135.339	-13.99	293.889	27.3933
915	453075	V. rupestris B38 x 'Horizon'	right	342.473	-96.9814	-330.225	-570.983	138.903	-225.104	-347.067	-137.469	-398.833	-96.7992	-103.627	321.617	-99.6985	369.563	360.153	418.855	152.89	-23.8439	285.032	41.1449
916	453075	V. rupestris B38 x 'Horizon'	right	319.518	-52.5529	-350.444	-654.359	170.322	-195.125	-354.509	-130.881	-417.543	-90.7082	-40.2259	333.828	-42.6612	371.838	321.203	366.432	152.127	-14.3428	242.212	65.871
917	453075	V. rupestris B38 x 'Horizon'	right	318.683	-52.7825	-327.688	-619.043	153.305	-217.5	-329.254	-152.709	-442.311	-90.9631	-67.7753	339.122	-60.9242	383.145	358.656	373.348	131.725	-8.9	265.583	46.2835
918	453075	V. rupestris B38 x 'Horizon'	right	272.123	-52.8883	-271.339	-664.876	138.047	-189.614	-342.179	-154.918	-454.334	-68.017	-27.8979	350.064	-9.05458	416.806	343.882	355.116	116.937	-19.7698	233.816	28.0977
919	453076	V. rupestris B38 x 'Horizon'	right	319.936	-73.945	-319.29	-607.858	154.402	-201.303	-335.091	-154.236	-467.882	-81.0393	-48.9278	320.214	-51.6246	381.981	323.877	402.744	141.415	-20.582	283.187	34.024
920	453076	V. rupestris B38 x 'Horizon'	right	331.357	-87.7287	-294.141	-613.879	126.502	-208.865	-338.415	-157.215	-447.553	-49.8522	-68.8225	328.687	-75.1255	381.964	340.714	397.106	138.268	-17.8514	287.215	27.6327
921	453076	V. rupestris B38 x 'Horizon'	right	364.075	-56.8926	-356.803	-524.637	124.963	-241.949	-309.183	-175.28	-419.801	-102.843	-116.086	321.97	-122.789	382.286	333.342	386.325	179.889	-26.2495	322.394	37.2695
922	453076	V. rupestris B38 x 'Horizon'	right	340.56	-84.519	-283	-543.256	92.5826	-243.484	-349.21	-164.608	-431.896	-75.2627	-85.4318	326.371	-73.9562	378.234	326.099	448.117	157.1	-40.3213	307.152	-1.27237
923	453076	V. rupestris B38 x 'Horizon'	right	303.919	-83.6511	-290.584	-617.896	154.207	-202.463	-350.525	-137.418	-421.333	-86.8941	-57.84	355.722	-60.5173	420.514	332.111	389.015	135.843	-35.2376	254.719	-1.69194
924	453076	V. rupestris B38 x 'Horizon'	right	295.142	-66.9712	-316.119	-589.899	129.101	-237.292	-343.995	-173.596	-397.004	-114.598	-48.7728	331.051	-49.7858	432.897	354.717	416.456	138.196	-33.7704	238.52	35.7232
925	453077	V. rupestris B38 x 'Horizon'	right	313.848	-43.8018	-366.233	-602.603	124.208	-210.032	-330.912	-188.243	-384.782	-99.3778	-78.8586	333.462	-76.7057	386.391	355.465	393.534	155.087	-14.7076	288.882	45.3769
926	453077	V. rupestris B38 x 'Horizon'	right	321.806	-61.7175	-307.222	-549.895	116.613	-185.559	-339.013	-190.904	-462.205	-111.255	-91.0893	325.735	-79.8196	382.674	385.263	388.953	157.473	-19.1877	298.193	21.1574
927	453077	V. rupestris B38 x 'Horizon'	right	312.029	-62.7554	-307.682	-650.375	149.668	-183.836	-362.143	-128.786	-462.941	-67.97	-49.571	307.436	-44.7877	369.733	338.183	358.134	143.411	-6.6626	283.836	65.0802
928	453077	V. rupestris B38 x 'Horizon'	right	341.078	-64.4942	-315.488	-556.255	126.863	-211.206	-348.334	-172.528	-459.973	-112.606	-77.4579	342.294	-74.6921	384.147	335.137	371.615	170.319	-18.4497	302.548	37.4827
929	453077	V. rupestris B38 x 'Horizon'	right	358.358	-74.2248	-352.792	-566.786	120.451	-225.409	-283.031	-146.514	-461.21	-81.8157	-84.6743	300.2	-97.6845	358.396	317.519	435.076	174.289	-15.839	308.776	16.9165
930	453077	V. rupestris B38 x 'Horizon'	right	310.13	-77.2256	-381.139	-591.469	107.899	-204.326	-236.434	-164.269	-420.155	-125.855	-91.1411	334.542	-83.843	381.873	367.18	425.967	141.177	-12.4337	286.325	33.1965
931	453078	V. rupestris B38 x 'Horizon'	right	373.099	-35.5157	-459.065	-602.784	219.422	-157.939	-322.239	-161.767	-371.211	-90.9358	-89.4508	294.954	-79.157	329.308	271.418	366.994	162.047	1.98553	295.137	55.7017
932	453078	V. rupestris B38 x 'Horizon'	right	335.512	-54.6755	-392.89	-618.702	150.601	-173.244	-341.842	-127.903	-405.48	-134.304	-53.9959	318.22	-57.0406	346.287	318.462	401.345	158.913	-11.2589	287.762	54.2352
933	453078	V. rupestris B38 x 'Horizon'	right	373.93	-36.8753	-486.925	-589.399	198.715	-171.124	-299.066	-150.742	-355.135	-103.65	-81.3906	264.462	-89.0694	308.729	272.01	408.044	166.684	-3.06191	300.247	73.6166
934	453078	V. rupestris B38 x 'Horizon'	right	314.874	-57.7414	-373.02	-696.721	166.2	-199.296	-325.138	-107.607	-366.515	-69.4681	-51.8003	335.764	-50.4601	386.327	293.487	360.027	144.953	0.416072	247.419	48.2991
935	453078	V. rupestris B38 x 'Horizon'	right	276.254	-49.2086	-314.713	-679.414	127.066	-206.916	-349.129	-154.107	-398.821	-62.3232	-33.1953	345.783	-20.0495	397.528	328.269	380.084	144.782	-13.0604	239.537	41.6337
936	453078	V. rupestris B38 x 'Horizon'	right	310.5	-16.8432	-375.315	-598.147	169.651	-165.905	-363.379	-173.69	-447.762	-134.096	-48.5649	299.035	-38.0378	354.075	353.917	371.717	172.794	3.81722	266.196	60.0391
937	453079	V. rupestris B38 x 'Horizon'	right	386.198	-59.5764	-326.307	-566.676	133.529	-254.813	-356.391	-131.89	-431.568	-60.9288	-88.8523	306.615	-94.0757	349.196	289.152	396.207	155.782	-8.55207	332.533	30.4185
938	453079	V. rupestris B38 x 'Horizon'	right	333.991	-36.4585	-330.497	-625.692	122.597	-197.111	-361.75	-161.264	-450.375	-111.654	-32.7653	328.373	-23.664	383.245	323.439	354.406	165.381	2.16616	253.644	63.9901
939	453079	V. rupestris B38 x 'Horizon'	right	330.695	-63.6457	-320.575	-595.413	134.237	-227.356	-347.257	-183.081	-439.563	-82.1606	-59.4303	345.417	-54.3166	385.246	324.376	381.16	149.086	-6.59068	282.748	46.4237
940	453079	V. rupestris B38 x 'Horizon'	right	326.655	-41.9266	-275.544	-602.964	110.728	-220.136	-372.892	-169.968	-482.376	-95.5152	-31.2022	342.274	-10.6154	378.282	329.412	355.109	133.533	-5.79488	272.303	60.6401
941	453079	V. rupestris B38 x 'Horizon'	right	325.594	-25.6822	-396.637	-614.736	134.537	-202.461	-321.035	-188.505	-410.219	-89.4337	-73.2603	319.486	-60.4102	355.11	322.791	378.508	180.316	-1.69536	298.323	69.4088
942	453079	V. rupestris B38 x 'Horizon'	right	347.652	-34.5371	-353.918	-656.749	150.957	-176.318	-346.576	-141.819	-442.734	-59.1764	-50.0339	308.505	-50.2105	362.374	300.292	355.486	164.666	-10.1921	279.907	52.426
943	453080	V. rupestris B38 x 'Horizon'	right	363.113	-53.0235	-379.261	-655.609	172.22	-179.606	-335.709	-95.9089	-392.963	-45.2482	-87.7591	291.687	-88.5519	335.095	297.453	392.262	150.512	-16.2758	300.947	26.6286
944	453080	V. rupestris B38 x 'Horizon'	right	389.215	-43.3597	-415.313	-572.988	186.795	-189.986	-316.729	-136.677	-397.85	-71.392	-115.056	283.5	-132.031	332.335	297.241	381.694	177.725	-12.446	326.003	29.3197
945	453080	V. rupestris B38 x 'Horizon'	right	370.301	-53.1658	-459.563	-546.207	159.777	-202.672	-290.995	-143.928	-348.054	-134.323	-100.996	288.279	-99.8768	335.182	276.399	441.202	164.792	-19.0889	328.215	34.7215
946	453080	V. rupestris B38 x 'Horizon'	right	329.91	-39.9407	-391.34	-616.928	153.862	-195.294	-336.4	-152.298	-401.302	-128.343	-38.872	325.856	-49.0897	380.528	304.541	395.695	167.633	-17.6372	261.059	48.3625
947	453080	V. rupestris B38 x 'Horizon'	right	317.611	-63.4355	-321.911	-657.042	166.53	-177.511	-355.984	-123.208	-437.148	-70.7278	-63.5619	325.515	-53.3658	372.79	339.378	361.367	146.593	-4.21444	261.86	36.4669
948	453080	V. rupestris B38 x 'Horizon'	right	341.977	-47.1663	-374.326	-634.051	138.417	-210.554	-339.201	-134.895	-395.934	-95.1961	-63.1606	299.463	-59.2193	380.114	323.565	396.71	164.962	-16.5108	262.92	62.0867
949	453082	V. rupestris B38 x 'Horizon'	right	293.672	-39.8383	-327.709	-694.916	130.666	-205.016	-348.821	-103.689	-363.796	-25.7643	-87.669	293.462	-70.7601	347.197	378.78	401.717	137.004	-1.34618	258.633	28.193
950	453082	V. rupestris B38 x 'Horizon'	right	281.814	-29.706	-241.345	-675.039	129.312	-188.705	-379.08	-114.813	-474.75	-64.9969	-27.3348	330.84	-7.18227	397.135	346.213	314.31	125.865	-5.21578	246.489	36.1904
951	453082	V. rupestris B38 x 'Horizon'	right	294.262	-47.193	-320.423	-595.911	109.345	-222.706	-339.223	-168.038	-427.362	-122.774	-61.6188	353.293	-63.9308	394.621	361.288	376.744	159.827	0.40919	287.835	31.5552
952	453082	V. rupestris B38 x 'Horizon'	right	353.196	-50.8845	-361.99	-674.183	133.201	-220.933	-307.132	-93.168	-370.938	-34.8514	-87.8333	312.591	-92.7577	342.06	310.927	389.002	100.539	5.23895	322.788	25.1281
953	453082	V. rupestris B38 x 'Horizon'	right	304.819	-33.418	-335.418	-675.11	163.201	-178.931	-346.916	-129.617	-438.955	-69.5665	-53.7414	318.408	-40.2357	372.407	335.658	344.201	135.832	6.2812	275.756	45.3451
954	453082	V. rupestris B38 x 'Horizon'	right	346.135	-41.9456	-322.267	-651.589	154.899	-222.952	-374.209	-113.211	-442.69	-50.8507	-9.84276	317.592	-14.7695	366.092	220.597	372.672	160.748	-14.6472	281.399	38.8404
955	453083	V. rupestris B38 x 'Horizon'	right	375.347	-69.5582	-337.356	-552.741	149.666	-218.978	-315.3	-129.427	-439.721	-45.1872	-117.062	265.581	-130.241	355.722	318.733	425.166	148.14	-26.6024	347.794	-3.97486
956	453083	V. rupestris B38 x 'Horizon'	right	314.839	-74.179	-325.906	-586.338	137.766	-208.382	-325.04	-140.882	-440.058	-111.684	-65.8477	317.38	-87.7648	406.834	354.953	406.881	164.22	-37.6821	272.839	28.0523
957	453083	V. rupestris B38 x 'Horizon'	right	322.53	-46.0404	-374.684	-594.673	122.17	-210.378	-309.942	-169.877	-398.582	-95.5151	-80.1895	310.907	-99.7218	377.635	354.111	417.858	170.275	-15.9536	294.033	26.0376
958	453083	V. rupestris B38 x 'Horizon'	right	335.679	-70.6658	-310.373	-599.913	149.664	-239.424	-338.113	-140.43	-427.559	-41.4851	-88.1036	300.4	-87.3002	378.746	345.315	426.266	148.581	-33.4372	272.21	19.9416
959	453083	V. rupestris B38 x 'Horizon'	right	359.006	-104.895	-307.476	-538.434	133.099	-198.731	-311.839	-150.682	-454.015	-70.0186	-103.547	313.758	-113.833	361.88	338.311	442.474	140.853	-42.2074	319.44	-13.1448
960	453083	V. rupestris B38 x 'Horizon'	right	375.643	-72.5029	-384.949	-483.022	120.425	-187.815	-277.002	-229.798	-456.455	-132.674	-81.0168	300.361	-94.7895	356.321	332.399	433.127	153.203	-25.68	312.542	41.6832
961	453084	V. rupestris B38 x 'Horizon'	right	335.452	-50.0877	-371.364	-617.205	145.265	-194.385	-334.871	-138.63	-424.295	-104.816	-62.1689	317.458	-72.6106	354.821	335.377	394.159	171.671	-20.5896	277.544	59.2764
962	453084	V. rupestris B38 x 'Horizon'	right	380.829	-55.1379	-422.537	-573.857	160.726	-202.731	-310.156	-133.16	-392.62	-91.0376	-89.4031	269.246	-97.7451	328.725	280.297	436.23	156.201	-11.6775	334.409	33.4002
963	453084	V. rupestris B38 x 'Horizon'	right	352.547	-70.0222	-368.142	-580.71	188.756	-201.112	-341.199	-113.262	-430.981	-68.1255	-93.7776	287.565	-100.207	335.403	292.087	422.709	186.585	-29.5042	314.331	17.0592
964	453084	V. rupestris B38 x 'Horizon'	right	369.172	-54.6309	-425.369	-609.911	174.931	-180.035	-298.903	-123.703	-400.33	-98.6779	-92.0402	296.728	-97.8412	346.269	288.688	381.541	160.749	0.316558	320.943	42.1034
965	453084	V. rupestris B38 x 'Horizon'	right	387.12	-67.5558	-408.977	-572.383	193.429	-204.694	-320.482	-115.071	-407.659	-60.5983	-102.25	278.593	-117.557	318.311	254.423	404.712	187.156	-18.0517	334.797	36.7374
966	453084	V. rupestris B38 x 'Horizon'	right	359.833	-37.9748	-450.142	-526.272	172.541	-192.308	-302.039	-173.686	-376.7	-131.934	-113.493	269.052	-118.212	339.792	326.58	415.381	183.197	-7.94626	318.436	45.8961
967	453085	V. rupestris B38 x 'Horizon'	right	336.383	-61.8801	-386.929	-635.356	187.915	-191.061	-305.725	-170.932	-418.137	-32.01	-66.574	297.939	-78.6338	354.759	296.725	404.738	137.031	7.19592	297.945	26.6068
968	453085	V. rupestris B38 x 'Horizon'	right	305.209	-41.6489	-342.189	-606.504	140.708	-178.353	-345.349	-154.297	-450.618	-86.971	-54.258	295.295	-84.3612	340.422	366.705	417.161	162.055	2.68744	302.099	12.2095
969	453085	V. rupestris B38 x 'Horizon'	right	296.989	-59.6617	-303.975	-610.211	131.536	-191.419	-367.121	-156.999	-439.677	-83.3808	-59.0358	322.587	-65.9728	373.801	365.301	401.629	163.923	-17.7967	278.033	21.4509
970	453085	V. rupestris B38 x 'Horizon'	right	300.511	-71.4424	-282.544	-591.578	131.643	-188.813	-345.278	-137.333	-465.995	-116.04	-70.8663	334.138	-65.9019	413.772	365.077	373.204	154.432	-19.5704	278.922	3.66223
971	453085	V. rupestris B38 x 'Horizon'	right	370.453	-76.0147	-367.369	-576.137	169.186	-193.358	-329.418	-127.978	-419.582	-63.0191	-110.671	280.955	-124.25	344.743	315.623	406.195	159.375	-13.3444	336.653	17.9574
972	453085	V. rupestris B38 x 'Horizon'	right	353.163	-71.9893	-396.244	-548.854	180.015	-208.928	-317.869	-150.865	-381.734	-111.809	-98.2404	307.541	-112.67	377.348	299.675	421.265	144.164	-17.5769	329.741	3.86896
973	453086	V. rupestris B38 x 'Horizon'	right	349.212	-64.6027	-413.213	-576.6	152.848	-185.906	-299.938	-132.172	-371.763	-112.042	-85.8357	286.325	-123.37	353.713	317.472	446.529	149.774	-3.87044	324.815	-11.3744
974	453086	V. rupestris B38 x 'Horizon'	right	317.425	-74.9558	-337.93	-487.175	140.111	-206.697	-308.56	-152.44	-381.229	-149.629	-137.017	324.67	-151.101	378.478	408.747	432.822	145.808	-29.4177	303.745	-35.655
975	453086	V. rupestris B38 x 'Horizon'	right	344.075	-84.8948	-349.464	-602.373	126.277	-201.78	-284.962	-129.694	-405.617	-53.6743	-111.455	304.604	-107.989	363.482	329.142	446.966	139.658	-18.5617	320.334	-24.0743
976	453086	V. rupestris B38 x 'Horizon'	right	329.227	-78.2363	-357.821	-580.727	137.199	-173.562	-312.266	-146.754	-414.369	-111.725	-98.5428	321.367	-102.883	367.019	363.318	425.073	158.838	-19.1374	297.3	-3.31598
977	453086	V. rupestris B38 x 'Horizon'	right	336.968	-43.577	-398.607	-573.192	157.881	-206.151	-320.316	-158.852	-398.304	-118.312	-81.4509	322.064	-95.6553	370.135	311.585	406.138	183.573	-20.4689	304.325	22.2167
978	453086	V. rupestris B38 x 'Horizon'	right	360.113	-55.6493	-439.14	-602.804	169.617	-179.19	-298.165	-119.912	-368.71	-87.2077	-86.3148	279.31	-112.341	328.44	284.704	434.294	174.694	-18.5728	315.544	21.2928
979	453087	V. rupestris B38 x 'Horizon'	right	417.144	-100.098	-351.327	-527.542	167.88	-226.923	-322.013	-116.12	-406.326	-55.0543	-119.779	278.072	-135.357	329.979	272.614	426.616	112.851	8.68337	364.313	-17.6128
980	453087	V. rupestris B38 x 'Horizon'	right	371.046	-76.223	-321.604	-549.456	148.464	-218.327	-363.719	-122.659	-436.077	-82.8143	-102.527	293.915	-112.354	340.245	334.688	414.734	155.851	-6.642	326.233	7.22738
981	453087	V. rupestris B38 x 'Horizon'	right	370.7	-72.5284	-366.319	-546.901	134.171	-211.509	-349.694	-175.641	-415.665	-105.957	-76.1198	313.031	-79.5945	363.227	287.062	414.607	170.467	-7.25099	324.992	28.924
982	453087	V. rupestris B38 x 'Horizon'	right	386.325	-97.1353	-361.905	-555.108	139.188	-233.607	-321.891	-126.013	-360.708	-56.9709	-116.195	292.638	-126.578	335.946	291.612	453.679	115.574	-1.68644	354.58	-11.7428
983	453087	V. rupestris B38 x 'Horizon'	right	392.644	-53.624	-416.989	-553.358	148.34	-239.346	-302.205	-132.339	-382.948	-88.129	-93.6667	281.542	-98.3638	326.888	257.846	447.364	154.611	-13.5744	340.732	24.5773
984	453087	V. rupestris B38 x 'Horizon'	right	354.037	-70.6212	-346.751	-575.084	167.181	-219.037	-341.42	-149.196	-427.641	-98.0044	-89.4861	327.477	-91.2284	388.469	319.059	371.223	154.246	-18.0082	302.003	42.7829
985	453088	V. rupestris B38 x 'Horizon'	right	337.832	-64.4242	-334.547	-524.685	139.948	-221.452	-368.438	-187.705	-433.908	-138.156	-48.8829	315.769	-64.728	392.874	324.041	418.764	165.962	-25.8118	282.721	34.8267
986	453088	V. rupestris B38 x 'Horizon'	right	323.323	-91.8065	-312.218	-549.556	166.562	-222.46	-316.446	-181.221	-441.656	-56.2102	-89.8255	337.866	-86.371	409.551	288.797	424.016	171.106	-36.0773	296.729	-34.1007
987	453088	V. rupestris B38 x 'Horizon'	right	289.452	-66.945	-292.358	-560.861	156.16	-201.728	-353.438	-167.253	-445.024	-126.921	-66.3817	336.637	-61.0217	416.995	370.169	402.602	134.995	-15.6391	267.447	-16.8864
988	453088	V. rupestris B38 x 'Horizon'	right	331.268	-53.7488	-378.444	-544.221	100.011	-195.434	-300.895	-165.233	-391.917	-162.781	-94.4842	316.541	-110.879	388.797	375.15	411.825	162.093	-12.009	308.098	16.2641
989	453088	V. rupestris B38 x 'Horizon'	right	381.543	-41.8041	-411.554	-526.113	166.142	-205.423	-312.877	-161.853	-408.708	-112.618	-98.9215	282.09	-120.201	345.483	307.706	419.536	168.607	-19.1055	328.263	19.8071
990	453088	V. rupestris B38 x 'Horizon'	right	348.804	-41.7963	-371.236	-543.499	142.259	-190.404	-345.061	-165.462	-447.344	-131.754	-69.1539	304.619	-78.6646	364.347	300.664	402.343	198.232	-9.9777	321.501	11.5838
991	453089	V. rupestris B38 x 'Horizon'	right	300.104	-66.6194	-274.588	-599.691	138.84	-195.562	-322.575	-159.277	-449.932	-64.2862	-85.8546	337.361	-94.3812	432.855	360.255	364.681	131.225	-18.6515	296.907	-30.8092
992	453089	V. rupestris B38 x 'Horizon'	right	339.109	-75.3093	-361.894	-573.917	181.878	-195.472	-324.532	-151.618	-424.511	-94.4102	-90.686	324.146	-93.5244	381.718	319.217	408.375	165.44	-37.7398	289.504	14.226
993	453089	V. rupestris B38 x 'Horizon'	right	378.463	-94.7863	-322.768	-517.464	174.16	-231.048	-324.066	-151.197	-472.723	-63.9819	-91.5119	314.541	-87.4666	369.269	247.034	415.315	165.162	-44.8813	333.717	4.23374
994	453063	V. rupestris B38 x 'Horizon'	right	347.237	-61.4119	-348.253	-602.928	135.293	-203.194	-332.742	-160.121	-443.414	-68.1563	-69.847	310.401	-66.1723	361.301	307.344	407.444	159.066	-24.407	311.488	41.0736
995	453089	V. rupestris B38 x 'Horizon'	right	381.633	-52.4661	-388.059	-553.903	194.095	-192.085	-331.881	-152.055	-409.778	-74.1317	-139.704	301.214	-128.555	344.37	323.985	359.618	183.787	-18.9276	314.478	38.3665
996	453089	V. rupestris B38 x 'Horizon'	right	370.717	-58.0504	-381.735	-522.403	121.301	-201.086	-319.007	-196.24	-448.907	-113.379	-75.7713	290.799	-84.0465	336.7	315.848	431.084	181.278	-17.1269	320.322	49.7022
997	453090	V. rupestris B38 x 'Horizon'	right	333.606	-62.4894	-343.826	-557.736	142.339	-194.062	-342.78	-143.478	-429.724	-111.398	-93.7975	309.213	-101.02	365.456	344.973	419.793	170.983	-23.2684	319.246	-2.03158
998	453090	V. rupestris B38 x 'Horizon'	right	382.436	-65.3657	-423.974	-608.165	182.028	-206.324	-309.257	-157.888	-395.527	-63.542	-64.9376	302.122	-68.1639	348.358	235.332	396.972	173.395	-9.50375	288.668	63.3369
999	453090	V. rupestris B38 x 'Horizon'	right	383.284	-85.2725	-413.347	-594.684	175.325	-203.671	-313.603	-117.484	-384.722	-49.2559	-84.0811	282.786	-104.938	319.163	242.291	431.575	182.255	-34.3596	317.536	51.2036
1000	453090	V. rupestris B38 x 'Horizon'	right	373.502	-78.2372	-365.744	-506.934	155.796	-226.774	-340.036	-162.01	-426.133	-96.407	-98.1529	285.385	-99.9852	343.439	298.588	449.153	184.765	-39.9037	317.399	32.2882
1001	453090	V. rupestris B38 x 'Horizon'	right	346.713	-52.0967	-382.706	-570.288	170.12	-194.683	-323.196	-179.478	-435.947	-126.842	-78.247	330.547	-72.6047	378.96	331.005	364.236	171.063	-18.8593	273.799	68.504
1002	453090	V. rupestris B38 x 'Horizon'	right	348.772	-73.176	-332.252	-597.311	153.685	-213.246	-350.88	-131.982	-424.8	-99.2578	-84.3557	319.458	-82.3002	383.014	344.474	383.134	148.484	-6.10889	279.174	35.4759
1003	453091	V. rupestris B38 x 'Horizon'	right	457.75	-52.7978	-421.689	-438.289	144.564	-200.009	-280.531	-166.76	-438.907	-81.9076	-108.65	238.237	-138.871	294.949	202.143	410.25	219.28	-32.7668	364.911	29.094
1004	453091	V. rupestris B38 x 'Horizon'	right	445.982	-41.3782	-455.039	-515.373	182.891	-204.092	-303.608	-113.701	-373.186	-99.7902	-110.785	252.551	-137.687	304.905	229.681	391.422	176.031	-25.4813	345.721	50.9373
1005	453091	V. rupestris B38 x 'Horizon'	right	436.445	-83.7775	-374.904	-494.497	158.238	-200.317	-318.783	-101.822	-432.416	-87.4679	-115.562	245.359	-159.669	321.145	275.806	417.601	188.431	-26.7375	342.415	10.5149
1006	453091	V. rupestris B38 x 'Horizon'	right	461.827	-93.0967	-358.951	-431.061	154.978	-216.88	-338.686	-133.437	-417.546	-84.9944	-121.914	258.878	-145.603	321.867	226.116	423.416	189.749	-50.3606	350.03	5.66814
1007	453091	V. rupestris B38 x 'Horizon'	right	438.168	-19.5907	-465.391	-546.736	177.507	-203.47	-264.102	-109.722	-396.554	-57.1406	-93.9704	227.833	-139.474	288.112	219.35	413.101	195.815	-26.657	328.652	34.2715
1008	453091	V. rupestris B38 x 'Horizon'	right	395.559	-75.6172	-356.896	-566.774	142.329	-202.769	-321.466	-124.99	-438.835	-36.635	-97.6592	263.698	-128.434	319.735	290.088	424.164	162.704	-21.8658	352.609	21.0532
1009	453092	V. rupestris B38 x 'Horizon'	right	342.945	-38.6082	-402.151	-616.562	128.963	-222.619	-319.852	-142.006	-380.317	-97.0748	-70.3364	305.257	-72.5336	357.346	302.53	416.671	168.8	-12.8127	301.951	50.4088
1010	453092	V. rupestris B38 x 'Horizon'	right	324.374	-62.4042	-355.48	-602.623	117.292	-214.799	-335.182	-136.769	-396.098	-120.146	-75.5578	315.663	-73.2946	387.959	347.974	413.062	165.598	-27.2155	280.373	47.2731
1011	453092	V. rupestris B38 x 'Horizon'	right	333.032	-67.3818	-345.056	-589.616	153.391	-198.72	-335.783	-150.628	-408.495	-111.997	-92.4622	329.784	-86.0602	381.98	368.674	396.883	129.555	-10.0897	283.205	19.7853
1012	453092	V. rupestris B38 x 'Horizon'	right	328.304	-50.2321	-372.617	-639.283	142.865	-182.849	-333.274	-149.159	-435.29	-101.754	-31.8127	310.752	-26.7362	352.458	303.001	404.872	135.037	3.20163	290.523	51.9948
1013	453092	V. rupestris B38 x 'Horizon'	right	343.567	-32.0812	-439.006	-559.593	165.694	-212.21	-302.446	-148.91	-367.895	-125.346	-105.237	289.617	-108.428	335.033	331.477	424.822	165.384	-19.4934	316.89	48.1612
1014	453092	V. rupestris B38 x 'Horizon'	right	344.676	-58.7096	-349.486	-548.077	152.258	-214.47	-350.12	-175.629	-448.994	-116.37	-68.3966	315.57	-71.6958	363.24	332.7	406.93	167.076	-22.5343	291.981	50.0507
1015	453093	V. rupestris B38 x 'Horizon'	right	364.544	-49.2107	-407.66	-610.826	162.212	-208.24	-324.549	-136.094	-400.164	-84.7385	-76.6098	299.996	-92.0062	350.338	282.396	378.218	178.9	-0.742116	312.936	61.2994
1016	453093	V. rupestris B38 x 'Horizon'	right	358.908	-63.5129	-328.127	-596.237	133.321	-207.177	-353.09	-126.187	-437.377	-79.6753	-94.6887	310.654	-95.6652	353.713	345.547	381.296	169.48	-15.9393	301.693	43.0641
1017	453093	V. rupestris B38 x 'Horizon'	right	386.912	-40.7321	-395.095	-578.114	169.254	-192.325	-348.014	-134.209	-424.457	-83.8415	-94.5272	281.535	-90.2275	323.661	288.771	387.845	184.017	-12.9292	323.366	49.111
1018	453093	V. rupestris B38 x 'Horizon'	right	415.253	-54.2184	-410.651	-537.923	163.35	-210.89	-332.133	-132.768	-405.983	-76.2173	-111.381	261.301	-116.597	306.443	262.698	403.453	184.209	-8.39309	351.234	49.2131
1019	453093	V. rupestris B38 x 'Horizon'	right	379.627	-66.6337	-361.6	-549.903	136.279	-207.266	-352.877	-153.198	-443.358	-112.305	-68.9399	292.836	-77.8259	353.848	294.667	404.681	169.245	-17.0224	324.782	54.9629
1020	453093	V. rupestris B38 x 'Horizon'	right	390.017	-35.9967	-401.11	-579.849	146.134	-216.565	-326.771	-150.887	-405.266	-72.9413	-95.8882	284.879	-96.5495	339.641	282.892	392.829	173.022	-8.95385	333.519	47.8438
1021	453094	V. rupestris B38 x 'Horizon'	right	345.978	-61.5913	-351.851	-645.176	171.689	-198.518	-350.094	-117.748	-408.009	-54.9927	-67.4915	317.762	-75.822	359.956	296.671	386.287	145.489	-9.4494	293.439	23.4701
1022	453094	V. rupestris B38 x 'Horizon'	right	345.694	-27.0467	-413.547	-641.652	160.298	-196.419	-332.114	-147.76	-385.896	-109.738	-46.7767	327.302	-42.4775	365.143	276.85	362.338	165.881	-0.72138	272.09	68.5546
1023	453094	V. rupestris B38 x 'Horizon'	right	297.749	-47.3109	-345.185	-651.35	141.354	-184.61	-352.945	-161.882	-415.023	-118.586	-15.4139	351.047	-10.3544	391.438	316.778	365.14	139.917	-4.6031	243.124	60.7172
1024	453094	V. rupestris B38 x 'Horizon'	right	325.896	-49.5749	-361.564	-638.125	171.781	-213.44	-343.637	-124.651	-402.005	-71.8037	-69.4306	317.732	-70.1819	375.144	303.405	387.655	149.878	-15.2908	295.858	32.3537
1025	453094	V. rupestris B38 x 'Horizon'	right	296.385	-63.9583	-327.758	-660.467	141.914	-200.213	-335.041	-126.236	-416.682	-81.4768	-40.6962	336.205	-38.7977	398.788	316.598	395.836	150.17	-31.3344	253.908	32.8571
1026	453094	V. rupestris B38 x 'Horizon'	right	315.44	-52.6056	-329.453	-581.439	157.475	-210.159	-364.604	-148.924	-402.735	-101.29	-86.8506	325.866	-89.8598	383.285	357.783	404.097	144.949	-17.3559	297.856	-1.47385
1027	453095	V. rupestris B38 x 'Horizon'	right	377.255	-41.4289	-460.053	-596.356	171.61	-191.518	-296.32	-138.664	-386.482	-94.4473	-84.7755	274.937	-80.6755	310.083	261.604	404.95	176.662	1.99846	321.175	70.4465
1028	453095	V. rupestris B38 x 'Horizon'	right	395.823	-57.9109	-399.635	-558.542	170.65	-210.15	-333.774	-134.39	-429.907	-99.8911	-86.5338	276.337	-93.3055	328.448	278.7	389.454	156.817	4.01429	341.166	62.6306
1029	453095	V. rupestris B38 x 'Horizon'	right	363.896	-61.2284	-349.436	-568.349	162.341	-189.154	-350.563	-141.363	-442.566	-88.3005	-109.399	291.244	-103.148	335.639	354.334	386.577	148.985	1.53005	325.557	33.405
1030	453095	V. rupestris B38 x 'Horizon'	right	352.827	-46.2364	-378.948	-650.768	153.603	-178.416	-348.418	-110.14	-423.885	-56.9626	-47.1923	278.071	-77.8642	312.444	300.505	401.455	174.155	-4.95151	295.218	55.5056
1031	453095	V. rupestris B38 x 'Horizon'	right	385.257	-79.0986	-372.03	-555.029	153.108	-204.586	-323.113	-133.461	-424.268	-87.1588	-98.0675	282.401	-111.278	339.465	309.046	431.218	151.384	-9.46311	329.962	15.7128
1032	453095	V. rupestris B38 x 'Horizon'	right	369.021	-41.2834	-419.805	-637.746	168.02	-206.7	-323.666	-131.561	-394.693	-65.68	-58.2628	290.109	-59.0772	322.199	257.731	397.565	156.893	5.97544	303.839	67.1224
1033	453097	V. rupestris B38 x 'Horizon'	right	359.932	-23.0808	-451.3	-583.621	151.583	-180.231	-309.755	-154.07	-379.223	-143.855	-80.4604	283.301	-84.074	338.247	316.254	393.996	162.19	12.3646	314.854	56.9492
1034	453097	V. rupestris B38 x 'Horizon'	right	350.342	-41.9033	-347.089	-606.577	158.149	-207.807	-328.824	-143.086	-429.717	-80.9603	-86.9022	330.764	-101.084	382.655	329.03	353.689	147.578	-2.62183	308.516	15.8479
1035	453097	V. rupestris B38 x 'Horizon'	right	342.568	-61.3504	-369.566	-558.038	154.989	-221.361	-313.545	-174.539	-420.504	-146.489	-84.414	341.858	-57.7031	398.438	331.593	388.094	133.106	-9.9531	283.476	43.3415
1036	453097	V. rupestris B38 x 'Horizon'	right	346.421	-63.1805	-372.436	-576.626	136.501	-204.476	-336.364	-147.513	-377.267	-108.266	-100.745	325.814	-96.7848	381.594	316.706	411.392	175.402	-29.5807	308.567	10.8405
1037	453097	V. rupestris B38 x 'Horizon'	right	311.711	-64.0526	-324.771	-573.035	160.943	-186.457	-348.461	-158.333	-452.907	-108.257	-80.0494	328.573	-91.2318	381.877	357.917	381.548	171.711	-11.9387	295.139	10.0744
1038	453097	V. rupestris B38 x 'Horizon'	right	317.986	-74.5043	-345.012	-590.952	133.7	-205.855	-340.326	-150.604	-378.499	-102.283	-97.4717	335.697	-104.189	388.498	357.512	402.899	158.498	-13.7741	297.803	10.8786
1039	453098	V. rupestris B38 x 'Horizon'	right	350.291	-62.5663	-377.655	-500.651	163.493	-226.987	-324.581	-203.317	-420.027	-159.252	-70.0893	330.599	-74.7336	400.695	311.164	403.439	154.907	-21.8748	287.231	39.9147
1040	453098	V. rupestris B38 x 'Horizon'	right	301.524	-73.4325	-279.617	-608.527	106.345	-224.18	-362.72	-134.516	-409.718	-102.234	-65.8681	340.356	-64.8667	404.27	377.334	398.929	140.354	-25.1764	257.234	24.5098
1041	453098	V. rupestris B38 x 'Horizon'	right	331.763	-68.6668	-357.701	-577.835	139.463	-227.064	-329.066	-158.305	-412.452	-113.135	-68.5352	330.382	-83.6606	391.88	324.353	404.454	170.315	-31.8005	285.521	50.09
1042	453098	V. rupestris B38 x 'Horizon'	right	393.929	-61.8583	-384.04	-525.51	148.261	-223.243	-323.596	-158.617	-401.951	-95.5167	-108.548	299.834	-120.155	346.796	299.845	418.344	159.614	-22.8704	336.644	22.641
1043	453098	V. rupestris B38 x 'Horizon'	right	335.895	-38.844	-390.279	-602.855	136.414	-221.74	-304.239	-149.526	-401.851	-126.327	-78.617	329.99	-77.9648	388.754	329.267	376.781	166.35	-12.5252	285.023	56.2919
1044	453098	V. rupestris B38 x 'Horizon'	right	340.628	-77.1851	-337.699	-636.359	152.893	-189.831	-345.81	-115.668	-417.324	-67.0014	-72.4943	307.516	-81.7855	371.704	325.554	396.106	145.271	-22.3852	290.767	33.1033
1045	453099	V. rupestris B38 x 'Horizon'	right	325.783	-74.4848	-325.946	-573.422	133.501	-194.863	-352.109	-170.723	-445.738	-132.095	-55.5335	344.462	-51.2051	400.733	322.055	380.77	159.539	-16.5217	289.653	36.144
1046	453099	V. rupestris B38 x 'Horizon'	right	345.873	-93.6911	-353.322	-678.546	132.778	-212.556	-301.078	-137.925	-375.354	19.9125	-72.003	297.155	-66.5313	377.862	251.709	414.757	155.862	-21.5593	282.067	34.5915
1047	453099	V. rupestris B38 x 'Horizon'	right	328.091	-72.2007	-304.606	-601.49	134.54	-205.932	-345.258	-179.087	-453.302	-86.5236	-50.6961	344.773	-56.5627	419.558	318.268	351.34	151.955	-15.2994	277.57	44.8605
1048	453099	V. rupestris B38 x 'Horizon'	right	311.375	-75.467	-360.166	-638.773	150.224	-182.74	-285.471	-115.146	-449.267	-77.9263	-73.6252	318.899	-83.8533	366.871	321.01	402.268	180.881	-20.7304	288.892	22.7456
1049	453099	V. rupestris B38 x 'Horizon'	right	323.245	-68.1179	-404.199	-522.885	126.044	-205.721	-289.174	-205.399	-365.107	-176.047	-78.0239	334.198	-86.7676	409.197	337.971	427.527	144.528	-9.81558	291.483	17.063
1050	453099	V. rupestris B38 x 'Horizon'	right	361.092	-83.615	-365.93	-542.335	150.165	-202.544	-336.471	-189.648	-451.398	-83.7869	-63.899	293.782	-69.7335	352.39	282.471	435.88	200.431	-26.4296	293.273	46.3068
1051	453100	V. rupestris B38 x 'Horizon'	right	382.26	-61.1468	-441.45	-556.727	162.152	-182.252	-267.623	-140.998	-376.853	-90.9121	-116.469	274.659	-159.598	314.398	331.862	423.07	165.123	-9.05613	320.597	28.9656
1052	453100	V. rupestris B38 x 'Horizon'	right	450.732	-47.8993	-452.93	-460.257	185.261	-205.2	-276.987	-119.819	-387.618	-82.4691	-140.3	246.54	-160.866	275.154	209.977	404.214	228.435	-34.5261	344.297	24.2617
1053	453100	V. rupestris B38 x 'Horizon'	right	436.288	-52.1061	-405.365	-614.984	212.475	-159.832	-290.236	-41.9361	-395.657	10.0009	-134.951	234.194	-155.696	273.739	235.059	354.976	152.762	-14.1089	345.321	10.0564
1054	453100	V. rupestris B38 x 'Horizon'	right	417.488	-32.9594	-493.462	-471.578	213.044	-154.632	-279.922	-197.271	-407.691	-123.736	-80.1641	250.615	-109.683	299.696	216.813	395.807	199.306	-22.7986	324.27	56.8562
1055	453100	V. rupestris B38 x 'Horizon'	right	373.358	-104.925	-346.317	-557.243	134.201	-170.485	-309.321	-162.985	-447.113	-84.8661	-99.7289	305.166	-106.37	365.438	327.361	419.002	164.674	-15.711	309.255	6.60772
1056	453100	V. rupestris B38 x 'Horizon'	right	371.493	-44.6914	-419.518	-566.051	201.755	-203.66	-312.495	-155.684	-428.635	-93.8749	-57.6295	286.264	-78.3404	342.723	267.1	429.56	186.875	-27.1335	269.395	32.548
1057	453106	V. rupestris B38 x 'Horizon'	right	398.715	-44.5234	-449.617	-596.437	163.295	-210.261	-312.414	-76.2784	-375.018	-43.3088	-100.246	217.067	-83.3224	254.431	211.714	430.067	214.592	-6.8125	332.302	76.0563
1058	453106	V. rupestris B38 x 'Horizon'	right	405.017	-61.0303	-415.411	-467.496	172.991	-184.671	-304.655	-151.334	-425.322	-144.278	-123.931	276.921	-127.377	323.512	278.358	401.032	168.308	3.79761	372.022	3.54571
1059	453106	V. rupestris B38 x 'Horizon'	right	357.049	-59.9005	-385.129	-648.458	195.399	-184.789	-324.131	-81.096	-431.717	-41.9995	-73.7801	273.672	-81.8456	309.649	275.816	402.912	167.68	-2.80792	300.658	32.8175
1060	453106	V. rupestris B38 x 'Horizon'	right	330.961	-29.9406	-417.79	-632.597	166.287	-197.995	-304.485	-151.866	-386.695	-56.8498	-80.7451	289.257	-95.0102	360.548	295.993	394.747	191.629	-16.2693	299.854	40.966
1061	453106	V. rupestris B38 x 'Horizon'	right	368.73	-58.0956	-402.704	-547.587	170.603	-209.766	-322.395	-130.933	-413.578	-121.162	-89.4733	273.776	-111.438	348.363	317.178	424.391	173.436	-18.0074	309.641	39.0211
1062	453106	V. rupestris B38 x 'Horizon'	right	361.153	-61.2131	-370.934	-588.554	154.258	-200.397	-328.13	-104.947	-426.645	-113.201	-73.1036	292.979	-99.6369	360.313	315.971	413.897	158.404	-21.4019	308.663	22.5247
1063	453107	V. rupestris B38 x 'Horizon'	right	289.661	-74.5871	-320.531	-642.036	132.887	-184.353	-362.181	-136.025	-409.235	-111.54	-41.778	360.975	-48.4212	390.343	333.958	366.77	157.654	-21.8423	267.986	52.2952
1064	453107	V. rupestris B38 x 'Horizon'	right	296.873	-37.9128	-353.174	-619.844	127.321	-206.185	-342.934	-159.165	-396.187	-128.22	-54.2198	342.727	-54.0657	379.723	365.231	391.929	139.423	-5.38138	271.732	42.3287
1065	453107	V. rupestris B38 x 'Horizon'	right	266.599	-61.3882	-316.605	-699.596	146.085	-195.749	-329.004	-102.321	-367.185	-66.9901	-71.1638	346.295	-65.8078	398.038	374.737	355.656	118.893	-5.66893	243.451	31.7242
1066	453107	V. rupestris B38 x 'Horizon'	right	314.378	-80.5625	-298.389	-640.023	132.645	-201.957	-335.411	-119.485	-438.426	-54.0615	-86.6714	324.209	-77.8038	375.026	360.75	387.014	152.538	-23.2154	276.39	33.0552
1067	453107	V. rupestris B38 x 'Horizon'	right	331.763	-48.4632	-341.451	-594.385	136.056	-187.889	-342.35	-168.586	-438.134	-120.218	-63.9553	328.274	-65.6348	391.486	355.218	375.282	152.606	-12.3381	275.883	36.8366
1068	453107	V. rupestris B38 x 'Horizon'	right	345.988	-63.9805	-311.302	-593.672	153.91	-199.405	-359.293	-134.858	-460.873	-92.2797	-77.5362	316.151	-61.6294	370.004	342.883	386.487	138.446	-17.6104	289.406	29.1637
1069	453108	V. rupestris B38 x 'Horizon'	right	299.53	-98.705	-312.059	-567.33	111.023	-212.748	-336.626	-139.099	-364.053	-138.201	-85.9998	365.09	-96.5982	404.024	377.641	428.57	137.646	-45.5423	269.497	3.94064
1070	453108	V. rupestris B38 x 'Horizon'	right	308.387	-83.8361	-310.008	-622.03	152.424	-185.292	-358.612	-130.61	-388.547	-88.5343	-80.372	355.696	-94.4083	393.24	360.882	381.283	135.927	-19.5834	274.327	-0.333407
1071	453108	V. rupestris B38 x 'Horizon'	right	229.071	-80.8514	-218.212	-603.656	122.111	-176.375	-374.716	-171.695	-427.855	-125.193	-36.712	382.481	-28.877	443.169	407.036	326.95	103.433	-20.1948	224.721	25.3664
1072	453108	V. rupestris B38 x 'Horizon'	right	299.338	-82.9324	-337.705	-638.151	141.838	-190.818	-326.28	-137.987	-379.951	-103.787	-71.9465	345.84	-81.1354	391.45	382.2	392.051	117.347	-10.5329	256.295	34.8673
1073	453108	V. rupestris B38 x 'Horizon'	right	306.149	-75.4481	-281.004	-557.321	147.844	-219.708	-371.805	-150.709	-417.908	-100.914	-104.317	356.355	-102.843	402.445	375.168	366.888	167.866	-32.3677	280.851	10.7788
1074	453108	V. rupestris B38 x 'Horizon'	right	272	-78.14	-309.52	-669.816	136.848	-185.634	-348.424	-123.576	-397.167	-74.5559	-65.6088	342.528	-48.6287	386.305	360.97	386.829	140.688	-20.4576	258.841	36.517
1075	453109	V. rupestris B38 x 'Horizon'	right	294.778	-58.2403	-367.628	-623.873	140.803	-182.778	-329.551	-164.435	-406.48	-119.056	-56.6447	328.92	-60.8616	370.441	364.634	400.566	148.024	3.87458	272.926	44.5817
1076	453109	V. rupestris B38 x 'Horizon'	right	319.969	-57.7039	-351.897	-601.245	131.534	-182.901	-342.085	-140.668	-402.071	-114.338	-78.6205	310.366	-92.4989	363.417	376.096	417.596	143.794	-3.13449	295.78	8.61129
1077	453109	V. rupestris B38 x 'Horizon'	right	355.611	-76.3487	-445.057	-526.786	203.464	-194.081	-297.628	-151.701	-380.848	-112.761	-108.5	276.423	-112.889	344.048	273.946	440.261	204.921	-28.8046	306.98	29.7505
1078	453109	V. rupestris B38 x 'Horizon'	right	289.67	-63.2585	-313.543	-629.561	122.628	-184.495	-354.286	-173.19	-432.287	-130.841	-16.6707	355.434	-14.4595	399.873	346.453	365.919	117.394	5.19664	255.1	54.9226
1079	453109	V. rupestris B38 x 'Horizon'	right	349.296	-53.2887	-427.456	-521.404	181.261	-204.789	-313.332	-162.958	-373.388	-106.65	-111.093	284.721	-132.671	324.385	316.934	445.078	184.643	-24.6368	325.805	19.543
1080	453109	V. rupestris B38 x 'Horizon'	right	351.284	-65.5504	-410.981	-523.007	129.273	-172.582	-300.31	-149.696	-349.751	-148.877	-128.152	295.973	-152.086	353.548	368.756	425.806	162.606	-18.9781	329.361	3.36218
1081	453110	V. rupestris B38 x 'Horizon'	right	356.376	-59.2098	-398.672	-604.519	134.869	-185.741	-311.487	-126.658	-395.442	-63.8406	-107.041	275.431	-118.042	324.701	323.362	422.455	200.897	-21.2335	315.179	38.6149
1082	453110	V. rupestris B38 x 'Horizon'	right	379.98	-16.0734	-467.923	-537.647	140.921	-202.13	-290.918	-172.323	-368.958	-148.4	-92.3197	289.923	-101.291	336.745	289.196	396.098	191.783	-5.73856	319.528	59.5458
1083	453110	V. rupestris B38 x 'Horizon'	right	366.165	-66.4543	-366.67	-594.957	143.178	-178.402	-336.842	-113.021	-409.951	-90.4279	-91.6303	299.155	-106.547	363.316	296.28	402.483	176.492	-18.3764	329.526	-3.31546
1084	453110	V. rupestris B38 x 'Horizon'	right	407.009	-33.2147	-468.253	-477.496	161.8	-205.45	-286.511	-154.763	-348.987	-115.734	-132.519	254.349	-145.951	287.601	281.17	444.059	194.648	-26.7598	337.595	27.4094
1085	453110	V. rupestris B38 x 'Horizon'	right	350.041	-82.5117	-328.302	-622.017	129.205	-184.126	-325.062	-118.529	-433.78	-49.7597	-92.9917	302.347	-96.417	366.842	318.633	406.776	166.673	-21.9357	312	2.91396
1086	453110	V. rupestris B38 x 'Horizon'	right	335.114	-45.7816	-357.607	-586.371	150.246	-185.868	-311.617	-165.52	-456.22	-108.477	-68.6895	315.339	-80.9064	383.794	342.075	391.546	149.463	-17.2861	298.142	18.6251
1087	454002	V. rupestris B38 x 'Horizon'	right	324.937	-57.3981	-348.701	-620.67	136.65	-217.93	-338.932	-163.756	-401.323	-74.3293	-61.1462	325.789	-70.9979	380.89	329.552	405.837	141.582	-17.4936	288.379	39.0616
1088	454002	V. rupestris B38 x 'Horizon'	right	298.408	-67.6202	-302.695	-587.355	111.597	-230.978	-343.106	-169.937	-390.668	-94.3339	-77.8511	345.305	-73.8301	412.055	366.147	419.919	137.691	-29.4181	274.309	2.36284
1089	454002	V. rupestris B38 x 'Horizon'	right	310.831	-55.6957	-308.767	-568.818	128.566	-235.837	-341.021	-158.615	-402.758	-107.645	-96.6864	327.071	-90.5433	389.573	399.836	410.306	106.929	-6.52916	293.613	6.18985
1090	454002	V. rupestris B38 x 'Horizon'	right	309.696	-76.8632	-291.715	-603.682	88.209	-230.28	-340.963	-160.246	-416.525	-69.8171	-74.6257	322.433	-71.4186	390.283	367.878	419.868	140.052	-28.9261	289.413	37.231
1091	454002	V. rupestris B38 x 'Horizon'	right	302.676	-71.2969	-253.291	-540.367	80.5244	-231.403	-370.808	-188.292	-442.598	-120.084	-67.5989	332.614	-61.7814	396.411	402.476	395.657	123.268	-6.24741	287.132	33.0081
1092	454002	V. rupestris B38 x 'Horizon'	right	335.396	-61.729	-333.813	-548.341	126.389	-222.475	-326.24	-184.774	-447.74	-126.52	-71.7226	334.287	-72.7209	394.538	348.409	394.901	151.77	-24.3484	290.274	44.461
1093	454004	V. rupestris B38 x 'Horizon'	right	341.152	-86.6902	-374.414	-486.003	159.404	-209.589	-337.589	-179.16	-400.717	-147.508	-107.144	325.025	-100.858	370.219	310.394	430.195	194.415	-28.0166	315.357	11.5278
1094	454004	V. rupestris B38 x 'Horizon'	right	313.307	-49.8017	-323.784	-624.992	128.673	-200.529	-363.653	-127.636	-412.67	-82.7754	-85.1557	315.277	-74.7292	363.918	363.252	393.747	159.542	-17.0424	295.218	29.8353
1095	454004	V. rupestris B38 x 'Horizon'	right	371.296	-26.1062	-468.41	-483.009	198.378	-189.132	-312.424	-177.13	-389.887	-149.417	-109.44	268.927	-117.38	315.599	278.85	390.138	211.427	-1.71367	337.589	51.8437
1096	454004	V. rupestris B38 x 'Horizon'	right	331.562	-50.2039	-401.236	-576.176	162.581	-159.799	-346.623	-176.432	-434.998	-153.587	-45.9097	314.106	-50.7531	350.157	307.471	381.619	178.108	21.4291	299.799	48.8877
1097	454004	V. rupestris B38 x 'Horizon'	right	285.2	-107.28	-240.623	-626.865	132.747	-195.397	-379.567	-121.257	-437.917	-87.9697	-58.9077	366.3	-36.8768	416.92	333.493	356.526	146.923	-5.83245	255.529	4.85344
1098	454004	V. rupestris B38 x 'Horizon'	right	363.251	-14.6278	-420.163	-622.605	200.02	-167.359	-340.703	-124.342	-399.103	-81.7179	-113.381	285.48	-87.6998	321.556	309.827	330.924	168.305	12.7324	319.646	59.9587
1099	454005	V. rupestris B38 x 'Horizon'	right	292.155	-38.1895	-371.533	-648.625	138.771	-181.754	-312.06	-138.807	-401.244	-123.957	-64.3188	322.652	-63.7104	375.583	385.978	379.855	132.332	6.13309	263.632	47.1095
1100	454005	V. rupestris B38 x 'Horizon'	right	325.039	-86.8634	-349.684	-558.093	139.131	-223.256	-303.733	-149.501	-427.023	-115.371	-82.4615	318.062	-102.398	401.969	334.174	424.397	178.39	-33.629	288.565	22.2855
1101	454005	V. rupestris B38 x 'Horizon'	right	309.471	-43.9262	-380.959	-614.154	149.788	-160.231	-315.913	-149.18	-419.41	-129.726	-61.1316	297.128	-90.7868	376.231	378.653	392.928	146.718	6.24904	283.57	24.68
1102	454005	V. rupestris B38 x 'Horizon'	right	325.268	-44.9616	-369.803	-667.6	142.339	-178.637	-319.656	-116.468	-413.916	-85.0459	-63.8956	308.614	-75.1869	369.102	336.568	365.852	153.687	5.70075	284.596	43.4442
1103	454005	V. rupestris B38 x 'Horizon'	right	335.294	-41.1437	-414.446	-624.952	162.065	-201.686	-309.276	-142.177	-390.503	-107.679	-59.7698	320.323	-73.6184	372.481	292.071	388.3	174.342	-15.9564	283.84	52.4889
1104	454005	V. rupestris B38 x 'Horizon'	right	296.824	-64.4781	-299.028	-673.43	115.752	-212.108	-350.104	-136.098	-427.392	-55.9725	-24.1526	341.482	-30.5738	387.141	306.985	380.888	150.249	-2.42191	261.441	34.996
1105	454006	V. rupestris B38 x 'Horizon'	right	361.622	-56.4341	-316.373	-568.895	112.906	-230.422	-347.577	-134.651	-436.822	-108.229	-83.0637	315.573	-90.3462	379.945	350.107	391.911	145.318	-25.7914	304.228	36.9946
1106	454006	V. rupestris B38 x 'Horizon'	right	360.582	-84.8234	-320.883	-430.69	109.737	-245.257	-316.017	-181.437	-417.439	-181.029	-112.305	321.077	-117.507	391.082	370.055	426.197	136.24	-13.0856	307.538	-2.03401
1107	454006	V. rupestris B38 x 'Horizon'	right	371.697	-39.3009	-393.718	-598.01	134.624	-212.797	-328.911	-135.067	-416.184	-106.944	-73.63	285.827	-77.1772	363.364	301.27	390.52	185.41	-9.49195	296.62	61.8991
1108	454006	V. rupestris B38 x 'Horizon'	right	429.121	-106.378	-343.519	-437.813	183.473	-238.063	-323.217	-119.161	-388.169	-17.3064	-143.685	234.734	-175.84	288.072	235.142	464.001	144.999	-29.3418	381.696	-38.7438
1109	454006	V. rupestris B38 x 'Horizon'	right	386.126	-82.7062	-356.929	-533.33	162.1	-233.668	-327.556	-114.028	-411.866	-88.7879	-101.66	300.949	-108.218	369.055	253.653	432.205	171.145	-33.6584	333.206	-16.0311
1110	454006	V. rupestris B38 x 'Horizon'	right	418.915	-59.9181	-385.787	-487.469	177.314	-224.579	-321.056	-135.666	-419.687	-83.9925	-124.936	277.617	-144.088	329.788	265.389	407.651	188.659	-32.0763	345.278	8.64548
1111	454007	V. rupestris B38 x 'Horizon'	right	350.305	-54.89	-339.481	-594.487	141.309	-180.062	-364.495	-151.309	-458.459	-101.995	-52.2645	324.428	-40.292	369.182	273.062	380.869	187.701	-8.5051	302.614	16.7695
1112	454007	V. rupestris B38 x 'Horizon'	right	347.504	-45.4439	-385.865	-601.791	182.349	-173.778	-339.221	-142.754	-408.431	-96.8978	-95.9035	316.03	-83.8518	364.826	311.894	378.684	164.286	-13.9988	307.239	15.1232
1113	454007	V. rupestris B38 x 'Horizon'	right	432.115	-36.629	-416.374	-541.008	149.243	-227.73	-299.705	-119.342	-404.12	-60.8271	-118.735	259.788	-112.601	299.92	242.089	417.418	173.852	-27.8174	354.236	36.2279
1114	454007	V. rupestris B38 x 'Horizon'	right	370.967	-57.5791	-330.468	-571.417	144.908	-204.392	-353.238	-136.212	-473.787	-75.0937	-83.9592	312.675	-72.9664	350.335	278.555	378.506	199.193	-27.5912	320.796	30.7703
1115	454007	V. rupestris B38 x 'Horizon'	right	370.51	-7.58173	-447.01	-489.897	156.549	-203.406	-323.18	-204.545	-387.676	-160.237	-88.1009	304.866	-84.8109	349.464	268.371	390.419	219.909	-20.6559	315.44	41.5733
1116	454007	V. rupestris B38 x 'Horizon'	right	408.239	-11.5277	-440.117	-512.637	188.51	-193.216	-334.954	-151.974	-413.583	-104.682	-102.69	266.124	-100.736	299.129	246.701	387.8	205.189	-28.9659	343.442	49.95
1117	454008	V. rupestris B38 x 'Horizon'	right	334.107	-78.3417	-348.606	-630.016	145.829	-214.634	-331.823	-125.953	-406.891	-70.5709	-79.1048	322.065	-76.4923	374.445	310.743	401.032	154.389	-10.5065	297.85	32.4792
1118	454008	V. rupestris B38 x 'Horizon'	right	356.731	-63.4809	-400.342	-652.935	168.786	-192.716	-317.428	-125.937	-387.008	-70.7188	-76.5855	304.19	-67.2343	354.358	293.264	382.455	135.586	5.28855	294.23	59.4966
1119	454008	V. rupestris B38 x 'Horizon'	right	356.042	-43.0501	-390.146	-594.982	135.487	-211.451	-327.699	-146.899	-414.699	-100.9	-72.3015	300.982	-72.8948	348.283	303.864	414.849	174.91	-9.59493	307.438	42.7628
1120	454008	V. rupestris B38 x 'Horizon'	right	339.599	-35.0237	-408.103	-660.503	164.76	-199.184	-329.556	-140.948	-399.335	-89.3824	-26.664	309.915	-14.6158	361.593	245.705	377.521	157.845	4.26864	270.364	71.7427
1121	454008	V. rupestris B38 x 'Horizon'	right	388.69	-43.3028	-436.495	-584.451	162.154	-215.851	-317.524	-118.96	-405.511	-107.057	-50.5276	281.707	-66.0645	320.608	219.827	411.528	196.496	-9.30268	308.955	65.081
1122	454008	V. rupestris B38 x 'Horizon'	right	349.398	-36.045	-401.255	-632.906	184.02	-173.114	-354.072	-128.828	-415.826	-80.4172	-52.5033	290.366	-56.2558	330.942	273.051	391.861	183.866	-2.71036	289.576	40.8504
1123	454009	V. rupestris B38 x 'Horizon'	right	331.374	-36.0245	-360.543	-622.665	127.811	-224.851	-322.703	-143.544	-423.315	-102.809	-65.5829	307.353	-56.7829	372.352	348.51	394.429	135.703	-6.34827	285.528	62.1081
1124	454009	V. rupestris B38 x 'Horizon'	right	317.351	-73.3949	-258.359	-540.454	120.712	-226.773	-364.686	-163.307	-454.941	-109.614	-78.3721	330.807	-88.2986	396.284	403.881	385.299	127.419	-34.4847	275.293	35.6363
1125	454009	V. rupestris B38 x 'Horizon'	right	365.442	-53.4085	-355.084	-567.115	149.595	-224.574	-332.8	-117.311	-425.473	-65.3067	-104.301	264.942	-114.443	315.094	351.32	445.231	147.208	-32.2174	318.534	34.6655
1126	454009	V. rupestris B38 x 'Horizon'	right	336.348	-90.1893	-268.291	-536.337	124.98	-257.924	-347.009	-141.005	-444.079	-79.8296	-89.3863	333.357	-98.2507	383.047	351.328	427.307	144.893	-49.5518	289.467	11.125
1127	454009	V. rupestris B38 x 'Horizon'	right	346.346	-106.114	-288.3	-556.692	140.132	-227.538	-353.732	-141.11	-454.536	-82.931	-86.7014	317.548	-86.3165	384.432	335.157	407.568	150.508	-23.4453	297.444	28.281
1128	452094	V. rupestris B38 x 'Horizon'	right	290.679	-63.3983	-288.747	-594.54	116.967	-197.78	-349.37	-165.964	-458.605	-121.603	-52.5191	324.496	-41.7372	407.136	380.066	387.629	130.79	-0.514583	272.476	24.5395
1129	454010	V. rupestris B38 x 'Horizon'	right	342.522	-26.7511	-406.956	-635.978	197.655	-187.154	-323.767	-118.768	-412.178	-80.8045	-73.4583	299.67	-81.5439	349.979	287.995	366.427	161.1	-0.722175	308.632	34.1019
1130	454010	V. rupestris B38 x 'Horizon'	right	379.776	-45.5046	-418.93	-445.473	148.052	-223.694	-308.365	-202.382	-402.214	-177.117	-96.4675	293.806	-99.4459	348.769	309.991	430.879	171.09	-19.3286	316.514	40.0444
1131	454010	V. rupestris B38 x 'Horizon'	right	334.517	-51.9437	-378.55	-604.91	144.987	-204.891	-321.713	-140.15	-421.422	-102.622	-80.173	316.327	-76.8128	364.076	317.483	399.708	186.254	-14.605	295.429	39.0115
1132	454010	V. rupestris B38 x 'Horizon'	right	288.921	-43.66	-271.042	-628.122	132.13	-191.498	-360.573	-149.806	-481.515	-101.93	-28.8558	335.095	-19.2495	402.429	358.051	351.554	125.589	-10.7206	256.545	36.6582
1133	454010	V. rupestris B38 x 'Horizon'	right	300.126	-46.1524	-318.016	-660.514	142.135	-190.088	-369.573	-129.481	-442.578	-74.5977	-35.5165	307.557	-30.7489	359.195	337.821	383.925	144.319	2.09744	272.031	48.0589
1134	454010	V. rupestris B38 x 'Horizon'	right	352.022	-44.0746	-406.582	-536.032	157.835	-224.596	-323.198	-155.353	-405.249	-138.739	-89.5789	312.72	-103.287	357.025	311.327	401.961	219.735	-21.2946	286.977	48.3844
1135	454011	V. rupestris B38 x 'Horizon'	right	356.834	-42.0124	-412.089	-568.49	173.651	-202.21	-330.917	-165.752	-408.084	-136.428	-77.9432	308.402	-74.9828	354.341	328.949	382.159	166.018	-14.6253	278.564	84.6161
1136	454011	V. rupestris B38 x 'Horizon'	right	362.159	-60.8999	-342.854	-638.947	165.741	-208.016	-342.673	-115.354	-449.5	-64.81	-49.4407	322.453	-35.1159	367.829	251.77	366.406	149.624	-24.6407	290.289	55.9783
1137	454011	V. rupestris B38 x 'Horizon'	right	354.551	-51.7744	-381.73	-607.481	139.999	-229.928	-332.072	-108.056	-391.507	-52.4498	-80.5264	282.341	-112.997	323.193	286.684	431.373	193.303	-14.2428	324.296	27.0247
1138	454011	V. rupestris B38 x 'Horizon'	right	399.598	-78.6616	-345.19	-581.384	196.071	-211.661	-331.63	-85.4691	-442.02	-11.6714	-125.531	260.557	-131.92	311.356	287.307	387.16	155.656	-23.7595	337.659	33.5341
1139	454011	V. rupestris B38 x 'Horizon'	right	343.549	-66.3367	-382.867	-578.769	154.198	-231.289	-327.809	-145.032	-391.234	-107.645	-85.1874	308.506	-82.6158	371.114	318.912	425.575	162.486	-26.9007	290.568	50.7788
1140	454011	V. rupestris B38 x 'Horizon'	right	366.769	-60.248	-388.659	-589.417	159.898	-215.314	-324.265	-137.903	-392.124	-91.9292	-93.0692	310.174	-113.437	364.542	319.844	391.503	173.815	-16.9542	291.228	45.5467
1141	454012	V. rupestris B38 x 'Horizon'	right	355.771	-38.4328	-358.429	-623.16	143.185	-190.178	-319.63	-142.715	-445.26	-67.0027	-85.5182	302.826	-82.2983	362.19	327.504	372.721	155.14	-10.5208	309.536	34.2734
1142	454012	V. rupestris B38 x 'Horizon'	right	349.326	-67.8153	-331.02	-587.801	142.287	-220.783	-353.37	-152.242	-426.65	-65.6007	-79.9981	305.354	-90.4428	374.195	323.987	406.523	167.166	-20.2045	298.716	28.3749
1143	454012	V. rupestris B38 x 'Horizon'	right	354.67	-63.8181	-301.22	-636.491	150.357	-203.262	-362.634	-73.6224	-435.899	-13.1367	-95.469	288.99	-83.7557	314.43	304.842	413.913	152.345	-18.7254	316.763	-8.27661
1144	454012	V. rupestris B38 x 'Horizon'	right	356.515	-20.2914	-415.244	-575.582	142.842	-197.774	-289.355	-157.139	-436.381	-117.785	-77.0461	282.984	-110.257	344.547	342.146	389.906	181.881	-2.40836	304.9	53.5419
1145	454012	V. rupestris B38 x 'Horizon'	right	344.505	-60.4506	-349.264	-567.897	126.733	-197.678	-340.734	-138.401	-430.673	-123.724	-83.8049	313.818	-109.158	369.988	346.529	391.703	192.039	-2.75291	303.828	15.3945
1146	454012	V. rupestris B38 x 'Horizon'	right	378.027	-52.3512	-463.761	-488.663	140.94	-233.389	-238.215	-187.505	-360.485	-105.436	-117.03	269.617	-144.544	324.573	292.723	458.18	192.571	-28.0331	319.774	43.0082
1147	454013	V. rupestris B38 x 'Horizon'	right	410.047	-67.9766	-435.567	-527.746	197.902	-180.661	-312.812	-103.214	-429.824	-51.5832	-63.1094	205.91	-92.3489	255.344	164.673	453.805	209.469	-14.7683	351.568	30.8905
1148	454013	V. rupestris B38 x 'Horizon'	right	387.881	-87.0968	-381.915	-565.745	153.777	-186.823	-323.196	-115.77	-417.598	-96.2112	-101.079	283.127	-114.891	340.199	297.943	414.474	160.932	-12.4245	338.147	26.2699
1149	454013	V. rupestris B38 x 'Horizon'	right	381.268	-52.2922	-436.194	-516.266	175.152	-216.681	-307.249	-161.403	-395.598	-115.155	-88.9113	294.6	-108.394	343.391	237.882	415.113	220.891	-18.7227	321.154	27.4152
1150	454013	V. rupestris B38 x 'Horizon'	right	403.462	-68.5799	-436.528	-539.714	183.288	-176.422	-314.768	-124.801	-401.449	-96.664	-104.522	256.341	-116.043	311.673	254.703	414.961	190.659	-24.9462	341.197	48.1524
1151	454013	V. rupestris B38 x 'Horizon'	right	375.73	-40.8926	-414.28	-541.916	164.102	-184.1	-330.861	-152.833	-426.084	-133.086	-74.901	287.639	-68.8998	344.405	258.453	414.411	179.375	-12.3227	337.366	18.6962
1152	454013	V. rupestris B38 x 'Horizon'	right	354.475	-72.2877	-342.482	-636.088	139.518	-201.688	-331.717	-102.623	-417.716	-36.7024	-86.9041	298.238	-100.32	342.479	309.331	410.962	172.884	-21.5906	302.93	19.3009
1153	454015	V. rupestris B38 x 'Horizon'	right	292.147	-93.8624	-301.145	-652.154	168.815	-214.659	-323.868	-114.213	-424.115	-37.9046	-80.5868	337.498	-76.2932	398.419	326.199	383.744	142.807	-25.8303	276.039	18.9614
1154	454015	V. rupestris B38 x 'Horizon'	right	305.709	-103.567	-256.382	-553.56	133.907	-230.273	-371.266	-126.65	-430.606	-100.68	-95.4596	334.948	-94.2767	394.915	381.313	407.008	152.478	-26.2835	274.583	4.1432
1155	452100	V. rupestris B38 x 'Horizon'	right	257.893	-65.2429	-241.953	-660.017	131.592	-193.502	-360.418	-137.358	-450.303	-79.4748	-33.209	348.851	-29.6217	409.706	394.569	325.331	108.545	-8.94286	222.907	60.6494
1156	454015	V. rupestris B38 x 'Horizon'	right	267.194	-102.42	-212.49	-613.361	128.07	-214.492	-377.419	-136.297	-451.358	-66.6811	-46.372	365.901	-23.3908	421.601	329.478	380.303	133.358	-35.7934	252.929	1.23938
1157	454015	V. rupestris B38 x 'Horizon'	right	254.96	-78.6681	-247.56	-671.227	137.12	-215.632	-358.754	-134.433	-421.296	-70.6447	-14.3924	366.186	13.9143	435.26	310.863	359.5	102.947	-17.668	222.199	27.3265
1158	454015	V. rupestris B38 x 'Horizon'	right	263.219	-73.7412	-262.73	-596.733	123.505	-213.32	-340.451	-176.039	-409.985	-85.076	-74.7595	376.897	-61.9734	427.08	381.737	394.103	144.329	-35.7661	237.108	-17.4038
1159	454017	V. rupestris B38 x 'Horizon'	right	370.093	-19.2302	-450.709	-637.117	133.429	-219.963	-261.738	-119.215	-388.652	-78.0348	-49.3384	235.399	-107.68	358.752	282.878	386.796	177.111	0.827875	294.607	91.7856
1160	454017	V. rupestris B38 x 'Horizon'	right	345.028	-41.9732	-358.021	-630.883	125.657	-212.994	-281.808	-154.214	-463.887	-91.2765	-32.267	261.149	-74.1982	410.256	351.247	365.331	116.352	18.7859	271.897	75.8186
1161	454017	V. rupestris B38 x 'Horizon'	right	368.275	-39.7341	-333.566	-623.99	154.74	-229.019	-356.622	-118.518	-441.923	-53.5463	-61.3974	277.527	-87.0452	355.102	337.748	381.449	163.287	-5.15967	256.503	55.8878
1162	454017	V. rupestris B38 x 'Horizon'	right	353.454	-10.8756	-482.32	-625.533	168.867	-184.958	-256.747	-139.854	-394.314	-113.124	-54.6876	254.881	-80.094	313.035	310.398	394.4	150.802	14.9108	284.641	97.1183
1163	454017	V. rupestris B38 x 'Horizon'	right	313.249	-49.5408	-343.704	-665.763	126.262	-187.263	-307.112	-138.89	-420.598	-99.5463	-48.9789	336.944	-62.6915	409.613	352.975	338.711	132.929	-5.11416	257.669	60.8492
1164	454017	V. rupestris B38 x 'Horizon'	right	367.052	-19.7473	-440.747	-614.884	145.205	-206.309	-271.427	-152.598	-401.977	-119.079	-61.4538	290.012	-81.027	358.617	321.81	382.465	151.812	-0.231445	270.752	81.7541
1165	454018	V. rupestris B38 x 'Horizon'	right	339.056	-84.8506	-308.096	-624.458	114.246	-208.291	-334.915	-97.1921	-428.79	-64.6824	-85.4246	292.504	-97.5662	379.619	343.628	407.184	154.87	-20.639	302.991	20.8063
1166	454018	V. rupestris B38 x 'Horizon'	right	365.536	-63.9868	-328.816	-588.181	152.66	-208.842	-354.315	-127.578	-435.687	-58.1326	-93.6348	303.96	-113.327	352.935	328.591	389.933	173.1	-20.4021	305.893	20.2931
1167	454018	V. rupestris B38 x 'Horizon'	right	371.116	-31.5548	-395.26	-557.058	147.611	-209.056	-340.597	-163.447	-443.166	-132.744	-54.0953	301.703	-34.4321	359.788	253.291	398.569	198.663	-16.0391	296.869	49.8382
1168	454018	V. rupestris B38 x 'Horizon'	right	373.565	-48.0908	-443.741	-519.861	188.305	-196.379	-296.974	-177.727	-400.49	-123.762	-88.1913	280.84	-113.231	343.921	290.118	420.641	170.428	-18.5473	320.212	38.9657
1169	454018	V. rupestris B38 x 'Horizon'	right	367.417	-40.7713	-397.109	-535.71	134.983	-208.478	-337.235	-165.267	-412.123	-127.319	-89.2016	285.514	-92.0277	341.848	318.272	420.993	181.4	-13.177	325.624	42.3668
1170	454018	V. rupestris B38 x 'Horizon'	right	394.754	-80.4674	-392.304	-557.706	183.363	-217.233	-317.84	-115.079	-391.267	-74.7452	-130.28	289.051	-128.42	349.94	284.437	398.276	175.66	-20.4488	321.898	28.4122
1171	454019	V. rupestris B38 x 'Horizon'	right	373.465	-35.3807	-434.439	-546.669	180.227	-189.109	-316.37	-158.281	-412.508	-119.071	-90.3626	281.77	-102.676	334.992	290.633	398.006	191.72	-11.7795	320.309	45.5218
1172	454019	V. rupestris B38 x 'Horizon'	right	351.28	-63.215	-385.888	-634.095	166.886	-201.625	-331.159	-119.221	-411.385	-39.0576	-50.6267	261.817	-90.752	331.972	281.714	433.566	177.235	-8.35026	292.697	38.2087
1173	454019	V. rupestris B38 x 'Horizon'	right	382.63	-77.9611	-418.856	-564.222	191.141	-214.931	-293.919	-107.091	-368.237	-68.1194	-110.819	269.368	-141.918	338.087	277.561	441.306	164.608	-28.235	317.809	11.7992
1174	454019	V. rupestris B38 x 'Horizon'	right	297.601	-66.3068	-332.53	-613.063	131.961	-216.509	-331.33	-124.738	-394.075	-124.481	-74.766	352.604	-79.3748	396.291	368.049	397.652	165.237	-26.3041	249.228	24.8546
1175	454019	V. rupestris B38 x 'Horizon'	right	349.246	-77.9694	-350.922	-616.344	183.18	-226.074	-327.958	-100.993	-414.156	-45.6983	-80.959	297.567	-106.961	354.294	299.659	418.783	148.16	-14.4819	300.711	10.9159
1176	454019	V. rupestris B38 x 'Horizon'	right	339.923	-73.4551	-314.967	-594.014	143.636	-202.596	-372.3	-126.36	-437.243	-92.3133	-77.5687	318.423	-72.631	371.733	323.643	390.606	158.48	-17.5584	309.027	25.5341
1177	454021	V. rupestris B38 x 'Horizon'	right	288.484	-58.6413	-273.589	-633.627	132.216	-200.22	-380.387	-145.168	-440.452	-79.2196	-54.7165	337.028	-38.9091	381.401	373.505	369.435	129.583	-14.0512	264.265	43.0638
1178	454021	V. rupestris B38 x 'Horizon'	right	342.734	-58.6398	-375.755	-557.354	156.256	-221.05	-335.197	-164.997	-413.773	-127.453	-86.2796	325.113	-85.5771	382.307	323.137	381.953	172.488	-23.8888	301.968	64.0097
1179	454021	V. rupestris B38 x 'Horizon'	right	274.802	-29.5883	-348.764	-607.284	150.088	-201.515	-360.328	-156.895	-422.113	-122.659	-63.4659	317.426	-60.4317	364.586	382.944	378.449	163.616	-11.0002	283.653	68.4801
1180	454021	V. rupestris B38 x 'Horizon'	right	327.367	-45.5165	-378.43	-551.238	155.747	-208.017	-352.251	-189.131	-394.041	-142.099	-82.2262	335.354	-81.129	382.009	340.204	379.67	165.257	-4.80109	299.502	43.7691
1181	454021	V. rupestris B38 x 'Horizon'	right	296.582	-44.5984	-293.23	-658.688	138.221	-204.836	-362.134	-120.908	-431.052	-66.2052	-62.5545	337.717	-64.5275	378.62	364.225	342.585	136.03	-12.7851	278.44	49.0984
1182	454021	V. rupestris B38 x 'Horizon'	right	318.701	-60.5115	-325.274	-624.391	142.377	-199.787	-352.442	-135.525	-418.068	-79.0702	-81.9911	322.607	-80.4823	373.35	357.138	385.113	143.142	-7.39416	296.9	25.6089
1183	454022	V. rupestris B38 x 'Horizon'	right	341.627	-13.8861	-382.623	-673.529	158.531	-165.545	-352.385	-104.056	-440.535	-54.8554	-30.1195	270.928	-57.9164	304.925	286.139	366.179	174.25	1.83243	303.032	68.0068
1184	454022	V. rupestris B38 x 'Horizon'	right	363.461	-28.2984	-413.655	-617.649	176.394	-199.575	-321.322	-130.402	-402.069	-86.6879	-77.9319	300.586	-77.6924	359.627	265.498	375.212	177.944	-3.58912	309.373	30.7752
1185	454022	V. rupestris B38 x 'Horizon'	right	298.286	-61.6945	-305.569	-616.547	136.898	-208.085	-344.614	-142.103	-433.27	-103.933	-66.7578	358.974	-50.381	407.833	337.034	374.598	160.74	-25.2537	267.635	16.2126
1186	454022	V. rupestris B38 x 'Horizon'	right	301.088	-39.5144	-329.178	-651.303	128.152	-191.88	-373.847	-139.849	-413.868	-106.465	-46.0352	323.028	-32.358	374.37	352.02	364.6	138.097	13.4451	275.929	53.5689
1187	454022	V. rupestris B38 x 'Horizon'	right	320.727	-46.7583	-341.592	-587.734	110.418	-218.248	-348.611	-150.687	-389.83	-118.934	-133.271	313.805	-60.7535	375.238	386.32	385.041	151.849	5.44976	304.742	42.8276
1188	453033	V. rupestris B38 x 'Horizon'	right	341.237	-72.0885	-308.169	-558.018	164.185	-221.31	-390.066	-151.891	-433.182	-94.4526	-86.9043	331.512	-64.6399	345.485	342.583	401.645	129.659	-22.3591	305.298	41.4766
1189	454023	V. rupestris B38 x 'Horizon'	right	321.939	-71.8994	-334.314	-591.879	121.438	-187.079	-338.163	-135.683	-425.976	-99.7323	-91.9401	302.523	-103.09	354.29	384.001	415.761	166.941	-6.55544	299.165	20.2539
1190	454023	V. rupestris B38 x 'Horizon'	right	350.262	-54.801	-386.056	-571.9	156.572	-228.884	-331.76	-164.059	-395.727	-99.6397	-72.2268	309.382	-84.2151	362.581	311.734	431.023	158.686	-22.0046	292.731	38.3026
1191	454023	V. rupestris B38 x 'Horizon'	right	292.474	-90.5168	-266.671	-607.616	117.767	-181.985	-357.781	-152.88	-433.511	-88.949	-85.5096	336.565	-77.6266	394.336	414.04	371.461	135.611	-6.92596	261.207	26.5124
1192	454023	V. rupestris B38 x 'Horizon'	right	318.235	-57.9707	-324.49	-622.163	125.856	-210.843	-337.455	-133.785	-433.341	-104.132	-67.156	327.668	-57.1988	385.091	351.508	390.45	140.151	-6.5379	283.891	32.2226
1193	454023	V. rupestris B38 x 'Horizon'	right	370.614	-36.7926	-410.033	-550.424	161.721	-212.909	-309.567	-157.295	-406.766	-119.746	-96.9175	292.778	-113.431	344.583	337.149	404.356	151.892	-6.95559	315.339	42.405
1194	454023	V. rupestris B38 x 'Horizon'	right	331.962	-71.4395	-299.789	-599.924	124.362	-205.609	-357.144	-119.046	-449.982	-71.0339	-82.0983	290.148	-75.5318	360.016	351.092	421.026	145.066	-25.2756	312.064	21.1371
1195	454024	V. rupestris B38 x 'Horizon'	right	365.268	-40.9596	-331.112	-620.473	161.685	-209.495	-369.147	-116.589	-420.193	-42.9029	-83.1955	290.984	-92.7325	353.279	320.61	390.269	155.381	-15.9105	293.436	11.7978
1196	454024	V. rupestris B38 x 'Horizon'	right	305.235	-48.144	-256.741	-585.429	96.4507	-207.286	-378.204	-166.699	-468.049	-113.122	-43.616	333.535	-36.1249	394.737	382.582	374.454	141.687	-15.4071	256.779	33.3615
1197	454024	V. rupestris B38 x 'Horizon'	right	281.071	-37.3084	-304.842	-596.665	135.187	-192.397	-356.51	-157.09	-445.58	-126.01	-50.4727	321.354	-49.1038	380.209	407.311	404.847	139.824	-23.5897	243.116	26.6507
1198	454024	V. rupestris B38 x 'Horizon'	right	294.833	-67.267	-305.629	-580.83	143.325	-206.213	-333.24	-164.13	-448.891	-111.525	-70.0291	322.901	-70.6614	408.239	382.583	402.279	139.956	-16.424	267.753	12.9705
1199	454024	V. rupestris B38 x 'Horizon'	right	339.436	-40.3385	-327.767	-599.931	123.84	-192.901	-319.786	-146.455	-428.219	-92.1064	-99.6043	340.942	-102.421	373.52	373.856	376.134	137.801	-10.819	302.864	-8.04477
1200	454024	V. rupestris B38 x 'Horizon'	right	368.856	-79.2614	-359.314	-529.969	179.573	-237.415	-337.433	-140.764	-415.278	-70.1415	-97.6647	303.047	-91.0831	359.446	241.146	440.052	174.409	-36.7298	336.788	-8.26455
1201	454025	V. rupestris B38 x 'Horizon'	right	329.602	-40.4033	-367.891	-635.768	149.128	-161.459	-349.727	-144.168	-427.657	-92.8212	-53.2541	312.821	-39.628	367.817	296.271	389.807	173.763	-29.7035	289.392	33.8777
1202	454025	V. rupestris B38 x 'Horizon'	right	297.547	-34.6966	-389.12	-619.019	126.707	-210.339	-337.259	-153.457	-389.475	-112.528	-52.2797	322	-49.3637	352.03	312.807	427.026	197.231	-9.42917	283.205	38.4132
1203	454025	V. rupestris B38 x 'Horizon'	right	345.846	-32.3452	-457.958	-573.634	157.434	-200.305	-305.952	-154.738	-359.78	-136.925	-66.0076	292.378	-70.8579	343.066	274.744	441.504	190.43	-20.7303	292.101	41.7297
1204	454025	V. rupestris B38 x 'Horizon'	right	354.355	-54.745	-418.933	-619.569	168.561	-194.855	-302.041	-136.783	-379.262	-84.7222	-79.2198	301.743	-96.2193	362.574	287.17	400.327	151.086	-6.57322	314.502	32.6027
1205	454025	V. rupestris B38 x 'Horizon'	right	330.632	-38.0536	-363.616	-645.853	130.884	-197.742	-342.372	-123.751	-424.312	-93.9807	-37.5911	308.695	-51.6091	362.02	300.775	396.502	171.348	-4.6707	285.861	36.8339
1206	454025	V. rupestris B38 x 'Horizon'	right	338.995	-47.6697	-380.833	-559.816	146.047	-224.749	-319.438	-171.658	-398.742	-121.162	-84.6949	322.241	-90.5132	377.143	339.443	420.526	161.578	-20.3329	288.159	25.4767
1207	454027	V. rupestris B38 x 'Horizon'	right	396.987	-20.2326	-455.966	-531.841	194.933	-173.999	-327.02	-144.688	-380.48	-135.886	-91.5321	274.685	-106.119	331.995	257.575	383.649	164.283	-16.2377	347.337	32.555
1208	454027	V. rupestris B38 x 'Horizon'	right	386.535	-56.3775	-372.003	-545.101	166.149	-159.231	-348.828	-114.214	-430.631	-112.015	-109.837	271.446	-136.401	333.262	331.967	383.999	168.603	-7.03408	344.445	5.26617
1209	454027	V. rupestris B38 x 'Horizon'	right	352.827	-74.2512	-371.031	-593.983	148.724	-172.319	-315.727	-122.118	-413.197	-73.2295	-109.417	291.32	-122.444	338.534	340.701	424.001	179.643	-24.2331	309.921	6.27976
1210	454027	V. rupestris B38 x 'Horizon'	right	383.088	-68.8003	-440.183	-546.173	199.008	-171.46	-281.587	-122.263	-396.445	-105.549	-113.622	267.743	-130.406	336.697	278.131	423.858	175.178	-12.0828	326.838	-1.96959
1211	454027	V. rupestris B38 x 'Horizon'	right	368.27	-49.2347	-409.943	-578.898	180.421	-161.823	-314.063	-128.826	-413.794	-88.3244	-105.31	264.94	-115.212	348.698	302.58	406.027	178.086	-19.0927	328.966	6.53303
1212	454027	V. rupestris B38 x 'Horizon'	right	377.705	-40.0628	-448.507	-583.79	187.801	-176.92	-307.494	-122.846	-378.545	-85.4479	-102.224	273.281	-104.522	325.069	252.652	408.83	196.796	-18.508	326.337	20.3949
1213	454028	V. rupestris B38 x 'Horizon'	right	326.736	-42.8625	-323.577	-634.813	138.886	-177.463	-353.266	-131.822	-473.942	-79.3166	-65.3281	309.516	-43.749	345.167	341.698	368.59	161.558	-9.50038	290.984	52.5046
1214	454028	V. rupestris B38 x 'Horizon'	right	290.828	-38.2163	-311.777	-623.943	134.063	-189.014	-353.505	-135.719	-465.002	-102.431	-46.6448	305.827	-69.3152	355.804	397.544	373.95	147.651	-3.00733	276.158	56.7477
1215	454028	V. rupestris B38 x 'Horizon'	right	318.11	-35.9387	-356.247	-676.71	149.121	-193.736	-337.596	-118.938	-416.63	-87.7995	-29.6843	327.852	-32.0774	371.761	308.547	376.004	148.065	-10.1186	248.392	47.6236
1216	454028	V. rupestris B38 x 'Horizon'	right	300.49	-58.8077	-259.232	-594.982	120.3	-194.473	-368.948	-155.981	-484.571	-104.34	-49.8547	339.507	-45.3135	407.373	358.545	345.201	151.625	-14.1986	276.96	30.6997
1217	454028	V. rupestris B38 x 'Horizon'	right	308.039	-45.5518	-326.559	-639.92	132.814	-193.38	-349.367	-135.949	-439.362	-101.044	-51.9994	321.024	-41.4934	381.225	345.642	381.134	142.901	0.383035	279.385	32.0793
1218	454028	V. rupestris B38 x 'Horizon'	right	289.893	-61.5746	-279.794	-617.756	110.06	-207.67	-338.745	-155.077	-475.364	-110.574	-28.3307	348.073	-32.384	401.915	357.268	368.563	141.942	-12.0905	255.454	46.1906
1219	454029	V. rupestris B38 x 'Horizon'	right	400.91	-103.61	-325.962	-489.995	120.26	-242.958	-321.924	-133.948	-417.027	-73.2492	-121.09	268.919	-135.365	347.707	304.186	458.465	141.67	-28.6938	354.343	-2.63671
1220	454029	V. rupestris B38 x 'Horizon'	right	367.085	-48.9329	-344.154	-576.772	167.935	-237.629	-364.993	-108.571	-431.687	-53.7967	-69.17	273.369	-97.6355	345.299	270.362	421.925	180.488	-32.2335	321.769	17.3421
1221	454029	V. rupestris B38 x 'Horizon'	right	335.283	-92.6527	-309.226	-561.226	121.027	-229.267	-340.538	-157.75	-409.715	-79.9876	-96.7589	324.576	-92.7498	396.408	333.433	432.22	162.749	-27.3472	296.497	-4.97453
1222	454029	V. rupestris B38 x 'Horizon'	right	355.428	-25.1264	-384.456	-564.502	126.647	-222.673	-333.24	-211.222	-420.616	-70.933	-69.6598	284.396	-76.8861	350.617	315.283	418.067	180.98	-13.8188	306.52	55.1952
1223	454029	V. rupestris B38 x 'Horizon'	right	370.318	-34.7516	-302.031	-562.551	102.996	-225.264	-398.329	-151.557	-464.996	-57.4622	-45.4925	268.026	-39.1066	296.553	300.173	445.28	146.358	-12.4348	330.11	34.1624
1224	454029	V. rupestris B38 x 'Horizon'	right	425.448	-40.1048	-357.558	-495.331	130.873	-253.667	-333.79	-132.905	-410.274	-55.2283	-126.619	261.404	-145.871	323.838	281.654	424.752	194.206	-38.3173	341.932	5.55863
1225	454030	V. rupestris B38 x 'Horizon'	right	284.994	-29.4864	-336.505	-622.508	133.479	-166.534	-358.371	-167.639	-449.895	-122.743	-35.9662	325.792	-35.469	375.77	357.354	370.863	168.232	-9.33108	272.147	45.8168
1226	454030	V. rupestris B38 x 'Horizon'	right	336.154	-62.4379	-364.535	-642.456	143.465	-193.361	-334.026	-121.206	-402.292	-59.5492	-86.8412	294.21	-87.4629	362.72	318.37	394.942	170.887	-6.62952	306.281	33.7674
1227	454030	V. rupestris B38 x 'Horizon'	right	354.396	-47.9074	-399.777	-615.295	191.329	-190.267	-337.157	-126.842	-436.329	-79.3353	-54.2121	273.436	-67.7453	324.682	292.467	402.999	163.871	-16.7678	293.157	75.2972
1228	454030	V. rupestris B38 x 'Horizon'	right	325.67	-41.0738	-443.176	-617.068	187.243	-160.346	-306.151	-140.785	-396.905	-102.61	-76.2297	274.463	-83.5979	335.077	310.733	406.343	184.233	-8.21087	298.18	54.2119
1229	454030	V. rupestris B38 x 'Horizon'	right	292.815	-53.6923	-340.229	-699.306	136.641	-173.963	-317.698	-106.329	-410.405	-55.386	-52.9605	307.093	-65.4906	380.589	345.417	378.097	149.999	-12.7733	261.911	35.6708
1230	454030	V. rupestris B38 x 'Horizon'	right	292.945	-29.5757	-402.363	-696.421	170.564	-179.949	-308.592	-122.391	-396.47	-72.4086	-40.1554	306.254	-29.5493	344.176	303.627	390.108	138.516	-0.417022	271.478	60.6239
1231	454032	V. rupestris B38 x 'Horizon'	right	381.228	-14.2267	-469.272	-614.819	153.568	-182.722	-277.668	-122.583	-402.37	-105.567	-56.1332	261.565	-82.4793	315.561	255.264	393.842	190.473	4.37895	307.389	64.5714
1232	454032	V. rupestris B38 x 'Horizon'	right	407.693	-42.4374	-357.951	-564.336	117.526	-218.067	-338.998	-130.429	-438.437	-54.592	-80.9669	278.613	-110.394	330.078	262.989	401.439	189.572	-27.5206	348.967	27.2533
1233	454032	V. rupestris B38 x 'Horizon'	right	375.927	-18.1658	-422.515	-592.699	135.188	-221.254	-302.972	-139.549	-399.214	-84.7115	-79.0526	266.167	-90.3866	330.785	296.224	426.391	170.557	-16.8884	316.244	49.9247
1234	454032	V. rupestris B38 x 'Horizon'	right	361.29	-98.3908	-299.467	-471.71	132.382	-239.375	-359.144	-170.345	-439.912	-95.4537	-107.876	291.963	-115.935	354.616	347.64	448.694	167.202	-35.9768	313.821	15.9789
1235	454032	V. rupestris B38 x 'Horizon'	right	335.429	-43.9234	-331.455	-633.186	132.306	-214.435	-295.463	-167.889	-455.867	-32.3862	-76.2882	308.426	-89.2332	389.018	339.052	363.675	143.663	-7.1411	297.857	37.8413
1236	454032	V. rupestris B38 x 'Horizon'	right	368.723	-82.666	-308.106	-534.082	156.64	-231.595	-353.105	-142.788	-452.071	-73.6072	-89.718	303.61	-117.474	373.346	323.544	408.181	169.392	-37.1657	302.175	16.7669
1237	454033	V. rupestris B38 x 'Horizon'	right	338.333	-36.7806	-368.912	-629.447	133.587	-230.732	-327.172	-149.257	-405.067	-74.531	-61.4083	306.579	-71.6221	362.323	332.696	403.226	148	-12.6021	281.567	61.2214
1238	454033	V. rupestris B38 x 'Horizon'	right	307.671	-40.0971	-340.6	-679.486	139.205	-183.278	-351.338	-148.169	-417.141	-86.8756	-23.4729	313.863	-21.5454	377.003	345.959	353.033	109.102	10.484	252.16	83.5225
1239	454033	V. rupestris B38 x 'Horizon'	right	342.223	-40.5718	-393.9	-650.192	183.518	-181.114	-332.545	-122.759	-406.133	-79.0161	-68.6659	296.501	-68.2706	348.691	319.172	379.007	144.673	-10.3291	279.927	59.7834
1240	454033	V. rupestris B38 x 'Horizon'	right	289.48	-55.5368	-315.181	-612.555	107.068	-189.892	-350.142	-167.046	-442.151	-137.557	-27.7881	341.943	-24.6817	402.076	351.38	379.558	146.907	-17.2516	265.109	56.2614
1241	454033	V. rupestris B38 x 'Horizon'	right	354.023	-18.0581	-369.036	-549.516	119.941	-226.27	-338.74	-172.099	-422.298	-101.589	-69.518	275.64	-78.001	340.494	339.168	452.398	145.184	-29.3913	319.278	28.392
1242	454033	V. rupestris B38 x 'Horizon'	right	299.182	-42.6526	-370.131	-658.756	163.27	-202.074	-354.809	-132.799	-414.861	-83.587	-21.5232	313.366	-15.0684	355.496	277.946	401.89	174.978	-16.6308	261.018	65.7478
1243	454034	V. rupestris B38 x 'Horizon'	right	329.751	-74.8754	-320.072	-598.616	146.909	-217.209	-317.097	-200.337	-441.387	-40.6144	-69.4883	334.725	-76.0305	409.179	313.522	385.765	149.357	-21.1879	284.536	23.1721
1244	454034	V. rupestris B38 x 'Horizon'	right	363.053	-57.1006	-385.961	-597.933	172.918	-231.821	-321.531	-138.619	-390.91	-56.5054	-92.1152	300.958	-109.936	368.175	290.693	401.39	180.498	-22.9775	293.292	34.4336
1245	454034	V. rupestris B38 x 'Horizon'	right	317.142	-80.4299	-295.677	-593.884	122.865	-230.861	-335.428	-201.333	-436.191	-73.8394	-58.0321	362.756	-45.5454	421.339	321.31	373.57	147.099	-18.6789	262.459	41.3605
1246	454034	V. rupestris B38 x 'Horizon'	right	333.303	-69.98	-308.93	-608.97	129.634	-238.994	-372.296	-168.282	-415.512	-77.1735	-53.9741	348.38	-39.6654	387.086	317.486	379.981	159.184	-20.6128	250.77	68.5653
1247	454034	V. rupestris B38 x 'Horizon'	right	320.412	-63.3102	-279.541	-618.664	123.89	-216.146	-364.204	-158.272	-432.986	-104.336	-36.0403	355.925	-29.9382	424.651	340.687	352.521	114.557	-19.4531	243.164	47.0837
1248	454034	V. rupestris B38 x 'Horizon'	right	306.202	-103.856	-224.641	-531.871	131.366	-213.173	-387.651	-148.723	-432.645	-98.8011	-117.187	342.736	-90.5581	411.802	401.795	371.239	138.407	-33.6368	274.911	4.28177
1249	454040	'Chardonnay' x V. cinerea B9	right	260.329	-2.27733	-392.036	-691.244	93.2983	-173.243	-14.6814	-92.1317	-528.759	-32.9184	19.7244	175.288	-86.5384	379.152	327.994	355.061	85.3005	19.2474	235.369	63.0657
1250	454040	'Chardonnay' x V. cinerea B9	right	267.959	-22.447	-373.117	-645.028	134.626	-174.975	-62.468	-111.318	-558.839	-52.0806	16.8976	167.439	-100.108	402.673	349.403	372.774	86.065	14.5744	239.581	48.3879
1251	454040	'Chardonnay' x V. cinerea B9	right	253.995	-1.62742	-322.122	-713.327	104.389	-164.217	-75.4591	-94.9027	-564.521	6.73565	23.1938	166.837	-50.3157	432.723	302.855	304.103	106.307	10.4869	221.679	53.1879
1252	454040	'Chardonnay' x V. cinerea B9	right	256.936	-18.3512	-375.965	-732.315	132.463	-153.31	-127.119	-90.1403	-531.39	-11.3423	26.8963	199.489	-54.0686	366.208	298.326	345.034	133.774	16.2331	240.148	78.4944
1253	454040	'Chardonnay' x V. cinerea B9	right	260.746	-19.2823	-386.725	-714.908	127.186	-158.383	-103.94	-96.9732	-513.474	-36.4079	16.8751	190.236	-64.7752	412.892	307.213	352.312	116.504	14.5837	240.39	55.9316
1254	454040	'Chardonnay' x V. cinerea B9	right	237.252	-19.3476	-333.511	-674.931	96.2559	-176.238	-50.7301	-85.1963	-571.632	-54.8115	38.6417	185.947	-89.608	428.427	337.138	319.567	108.119	22.8859	228.075	53.6981
1255	454041	'Chardonnay' x V. cinerea B9	right	278.9	-13.1618	-372.513	-737.246	149.088	-158.846	-296.044	-120.791	-400.766	-27.144	-62.9204	302.182	-44.9197	357.992	337.859	335.509	156.991	0.411801	254.325	61.0931
1256	454041	'Chardonnay' x V. cinerea B9	right	310.366	-30.3983	-377.724	-666.26	169.441	-180.367	-208.249	-147.942	-513.733	-36.836	-79.8731	295.635	-37.197	357.933	315.557	352.691	154.748	0.453929	266.664	55.0896
1257	454041	'Chardonnay' x V. cinerea B9	right	293.496	-35.772	-357.873	-693.33	146.834	-188.048	-190.702	-104.145	-501.747	-49.9129	-85.9489	327.995	-41.8391	360.713	324.469	337.159	143.922	9.31889	269.389	36.0221
1258	454041	'Chardonnay' x V. cinerea B9	right	299.771	-41.296	-362.474	-672.132	145.803	-194.846	-148.303	-131.373	-502.726	-22.288	-111.731	325.171	-67.4641	377.55	327.728	332.326	155.14	-11.3312	264.256	38.22
1259	454041	'Chardonnay' x V. cinerea B9	right	282.148	-28.4227	-385.204	-694.438	151.597	-179.338	-160.596	-125.534	-489.054	-37.8362	-64.7356	298.838	-69.931	365.788	339.847	358.489	136.737	5.79767	259.192	36.6562
1260	454041	'Chardonnay' x V. cinerea B9	right	263.15	-16.1759	-387.466	-707.137	103.938	-182.41	-100.329	-73.6868	-491.589	-79.1996	-74.7955	293.156	-57.7627	346.76	372.834	344.786	130.873	15.8308	241.148	58.0778
1261	454042	'Chardonnay' x V. cinerea B9	right	315.728	-26.9431	-424.659	-701.845	158.536	-186.121	-188.893	-95.6433	-466.644	-34.5985	33.0256	191.652	-85.7819	375.614	263.523	374.759	142.647	14.3373	252.517	88.7885
1262	454042	'Chardonnay' x V. cinerea B9	right	313.328	-1.08726	-441.369	-692.338	122.621	-193.63	-79.4163	-101.297	-492.116	-39.8236	-20.045	225.543	-73.1203	360.876	273.003	353.583	139.378	8.48545	257.736	79.69
1263	454042	'Chardonnay' x V. cinerea B9	right	332.367	-11.464	-433.061	-637.993	110.858	-179.183	-131.313	-116.693	-506.749	-102.805	-42.9476	226.296	-89.2322	345.875	350.004	370.942	139.237	14.9785	270.838	90.0475
1264	454042	'Chardonnay' x V. cinerea B9	right	312.689	-15.0127	-440.637	-682.433	126.66	-171.317	-89.2793	-95.2277	-506.203	-59.2462	-14.7895	209.825	-74.1162	358.983	280.178	365.183	137.393	21.2434	268.105	68.0019
1265	454042	'Chardonnay' x V. cinerea B9	right	295.34	-25.7711	-395.632	-720.276	126.108	-202.206	-129.916	-104.255	-477.778	-8.83595	-16.9715	228.665	-75.337	376.221	307.571	366.068	113.237	19.4949	253.378	70.8951
1266	454042	'Chardonnay' x V. cinerea B9	right	325.203	-10.3005	-444.213	-649.931	159.591	-180.173	-176.026	-144.025	-467.291	-48.0033	-29.1145	197.083	-106.54	363.393	321.107	394.373	133.921	12.7225	283.362	64.8611
1267	454043	'Chardonnay' x V. cinerea B9	right	297.484	-9.49235	-389.259	-664.299	159.122	-161.66	-242.157	-170.275	-494.37	-69.4608	-62.6511	299.329	-35.2706	355.249	346.544	340.77	165.879	10.3862	254.678	69.4545
1268	454043	'Chardonnay' x V. cinerea B9	right	310.283	-30.6302	-306.981	-660.885	114.415	-204.355	-208.459	-152.037	-535.308	-6.67698	-72.816	311.467	-67.1334	373.941	347.973	336.986	155.086	-8.64983	262.94	40.8396
1269	454043	'Chardonnay' x V. cinerea B9	right	300.229	-17.1312	-354.761	-707.575	155.658	-159.704	-273.296	-124.722	-463.827	-17.4875	-65.9499	288.321	-46.4399	364.735	325.286	357.09	154.878	-12.5791	268.224	29.0526
1270	454043	'Chardonnay' x V. cinerea B9	right	289.703	-46.236	-315.758	-702.983	176.98	-165.721	-280.886	-144.776	-499.184	9.22529	-50.8923	297.1	-23.2808	366.464	316.109	343.811	136.885	-5.94869	250.324	49.0652
1271	454043	'Chardonnay' x V. cinerea B9	right	284.808	-27.5745	-398.269	-719.839	129.675	-181.078	-115.71	-106.029	-485.046	-26.946	-62.3232	303.949	-32.1768	367.581	278.939	349.044	153.548	-7.34245	246.555	48.2347
1272	454043	'Chardonnay' x V. cinerea B9	right	325.96	-31.1572	-427.86	-596.325	174.37	-169.89	-228.539	-201.247	-462.536	-87.0693	-92.7266	302.683	-81.0135	368.798	324.865	365.181	180.243	3.1193	287.237	45.9072
1273	454044	'Chardonnay' x V. cinerea B9	right	325.227	-61.9217	-358.4	-600.319	167.102	-214.422	-100.51	-95.6005	-546.4	-11.5429	-10.7076	186.97	-150.406	419.148	276.469	398.472	127.678	-35.6344	269.947	14.8508
1274	454044	'Chardonnay' x V. cinerea B9	right	320.554	6.82607	-476.238	-666.581	143.324	-159.367	-97.6528	-89.9274	-444.922	9.2447	71.2555	105.581	-159.852	310.958	232.452	407.259	141.792	9.55886	269.287	66.4479
1275	454044	'Chardonnay' x V. cinerea B9	right	339.376	-12.8924	-505.642	-613.491	144.38	-183.601	-111.002	-146.233	-425.741	-80.8072	-53.2235	220.957	-122.456	351.704	277.707	399.334	167.729	0.362427	288.873	64.6672
1276	454044	'Chardonnay' x V. cinerea B9	right	341.169	0.610102	-440.762	-644.13	141.849	-208.323	-158.287	-143.674	-492.502	-36.1442	-51.058	244.718	-66.8676	352.646	255.876	372.039	200.441	-17.945	270.142	80.2026
1277	454044	'Chardonnay' x V. cinerea B9	right	328.215	-54.6551	-382.35	-629.481	133.906	-212.8	-92.2281	-110.286	-532.676	3.94655	-26.9814	218.541	-140.591	356.92	290.427	403.959	140.668	-20.794	281.611	44.6495
1278	454044	'Chardonnay' x V. cinerea B9	right	341.658	-8.45802	-470.073	-616.972	134.29	-189.672	-109.912	-126.882	-481.665	-37.963	14.0437	154.742	-131.531	344.48	251.159	416.786	171.372	-11.2369	280.659	75.1766
1279	454045	'Chardonnay' x V. cinerea B9	right	323.257	-13.2748	-378.723	-695.552	175.527	-154.649	-278.679	-132.701	-486.025	-16.7967	-61.0442	284.32	-32.5549	326.322	287.704	335.427	168.239	8.69104	282.299	58.2139
1280	454045	'Chardonnay' x V. cinerea B9	right	327.305	-7.91917	-410.101	-713.625	142.733	-163.12	-286.354	-140.877	-409.613	-30.378	-44.509	287.561	-40.8077	345.813	284.097	355.041	180.112	2.43738	257.138	65.0678
1281	454045	'Chardonnay' x V. cinerea B9	right	340.835	-13.5903	-392.426	-652.078	164.898	-176.651	-295.283	-152.112	-442.498	-38.3325	-87.8378	286.135	-66.4232	341.242	317.93	373.026	163.588	-13.8556	297.218	46.2164
1282	454045	'Chardonnay' x V. cinerea B9	right	331.277	-17.2652	-414.534	-608.523	178.292	-167.487	-278.26	-190.51	-482.865	-70.0059	-53.9709	280.416	-50.4864	334.753	297.163	390.997	187.692	-7.36229	285.694	54.9878
1283	454045	'Chardonnay' x V. cinerea B9	right	329.643	-40.5023	-309.168	-637.683	158.116	-178.551	-311.534	-147.157	-513.015	-28.6392	-95.5272	300.843	-44.175	360.217	329.259	342.48	163.1	-2.13464	293.3	31.1261
1284	454045	'Chardonnay' x V. cinerea B9	right	336.127	-44.6957	-324.261	-658.477	171.185	-178.738	-307.799	-143.683	-497.095	24.6624	-81.9092	281.946	-63.0551	340.408	294.161	354.452	183.819	-18.6735	288.827	42.7997
1285	454047	'Chardonnay' x V. cinerea B9	right	288.542	-10.6093	-388.587	-731.354	161.564	-140.712	-244.013	-117.151	-460.413	7.48992	-58.2199	250.599	-53.0419	342.858	303.813	346.765	180.734	1.8241	269.621	50.2908
1286	454047	'Chardonnay' x V. cinerea B9	right	285.368	-6.65209	-380.814	-725.134	147.27	-168.768	-181.125	-114.634	-487.344	-2.68434	-28.0177	255.792	-71.9849	378.976	306.285	341.015	156.082	-4.81254	254.281	46.9021
1287	454047	'Chardonnay' x V. cinerea B9	right	333.741	-5.78176	-424.212	-670.485	157.766	-170.513	-295.423	-144.445	-413.402	-43.6306	-80.9865	273.821	-59.0931	329.276	298.847	367.931	188.533	-5.15683	294.229	68.9849
1288	454047	'Chardonnay' x V. cinerea B9	right	306.482	4.27274	-422.791	-699.577	137.923	-184.007	-290.726	-149.878	-397.901	-53.9286	-44.4785	276.727	-28.7532	340.922	305.217	375.899	171.526	5.0742	263.502	84.4965
1289	454047	'Chardonnay' x V. cinerea B9	right	318.513	-49.8556	-382.783	-696.911	183.433	-163.147	-276.661	-127.008	-434.9	-1.88468	-75.6736	275.782	-67.1712	364.681	290.349	363.668	166.444	-11.839	278.45	46.5142
1290	454047	'Chardonnay' x V. cinerea B9	right	312.093	-28.0152	-390.333	-676.765	171.55	-156.256	-247.23	-125.177	-470.308	-24.1934	-76.0987	287.669	-88.2257	357.113	291.946	347.218	203.459	-3.86434	293.147	22.2703
1291	454048	'Chardonnay' x V. cinerea B9	right	281.496	-26.0783	-408.686	-650.605	115.057	-190.046	-103.211	-96.1533	-513.046	-131.4	-14.3257	255.248	-46.5355	406.478	311.073	385.91	125.328	2.35098	252.849	44.2968
1292	454048	'Chardonnay' x V. cinerea B9	right	327.36	-23.3863	-395.956	-650.053	165.222	-194.662	-260.961	-158.03	-454.246	-31.5651	-77.5444	260.387	-80.952	365.663	320.313	378.795	157.072	8.22062	299.693	44.6327
1293	454048	'Chardonnay' x V. cinerea B9	right	321.465	-32.7757	-349.849	-685.478	178.809	-158.25	-261.431	-119.167	-503.801	6.63942	7.71948	189.478	-99.7949	388.547	305.294	356.623	129.208	7.38505	272.381	46.9975
1294	454048	'Chardonnay' x V. cinerea B9	right	329.364	-18.1877	-383.654	-689.682	180.505	-163.066	-178.718	-120.599	-530.015	21.5728	-39.0842	233.135	-83.9532	359.141	265.32	316.472	164.678	3.34912	275.557	57.865
1295	454048	'Chardonnay' x V. cinerea B9	right	336.312	-30.3237	-416.878	-635.892	160.012	-189.257	-265.245	-160.864	-441.538	-35.6037	-91.6118	279.777	-69.4682	320.308	305.643	404.834	192.198	-14.745	290.575	61.766
1296	454048	'Chardonnay' x V. cinerea B9	right	309.531	-34.8204	-395.203	-685.546	137.134	-166.636	-136.812	-109.734	-530.867	-9.05805	5.81019	175.593	-20.8259	386.334	213.331	389.909	137.626	3.19582	280.275	50.764
1297	454049	'Chardonnay' x V. cinerea B9	right	325.69	-44.1734	-353.708	-652.309	154.495	-163.644	-284.677	-156.72	-477.33	-30.2103	-82.2085	296.229	-78.8712	372.595	324.395	347.304	176.026	-10.1976	296.189	41.1256
1298	454049	'Chardonnay' x V. cinerea B9	right	311.41	-31.639	-361.224	-670.849	162.015	-168.116	-268.952	-145.023	-476.654	-27.053	-71.8068	290.101	-60.9649	378.418	308.906	362.093	169.431	-9.7114	287.841	21.7792
1299	454049	'Chardonnay' x V. cinerea B9	right	324.936	-31.0829	-390.285	-674.928	165.783	-176.695	-290.958	-130.778	-427.228	-28.1206	-84.157	283.986	-76.5217	342.576	321.606	376.796	172.273	-17.2152	284.552	55.4622
1300	454049	'Chardonnay' x V. cinerea B9	right	310.84	-49.0133	-345.085	-669.574	168.891	-172.36	-273.631	-143.892	-474.727	-16.0434	-92.3988	294.213	-71.7057	370.859	341.465	354.365	161.898	-4.36713	274.453	35.8131
1301	454049	'Chardonnay' x V. cinerea B9	right	317.544	-11.8886	-403.182	-669.301	155.105	-165.014	-265.231	-151.63	-446.681	-38.7977	-73.2899	284.275	-72.6633	349.297	315.904	373.706	187.109	-3.59327	285.385	32.9465
1302	454049	'Chardonnay' x V. cinerea B9	right	320.94	-27.7947	-403.855	-670.26	165.624	-168.741	-255.265	-157.788	-453.836	-20.0563	-67.9404	282.932	-74.9364	348.777	296.603	370.787	184.581	-2.98469	288.085	45.1274
1303	454050	'Chardonnay' x V. cinerea B9	right	312.865	-7.57856	-418.954	-700.313	156.424	-166.202	-247.626	-145.804	-444.705	-61.2315	-39.3193	296.889	-39.8217	355.741	298.828	329.203	155.953	7.82567	266.356	91.4712
1304	454050	'Chardonnay' x V. cinerea B9	right	304.35	-24.9674	-407.712	-702.371	153.008	-170.441	-271.489	-141.68	-433.433	-52.5811	-30.7106	285.104	-29.6763	354.467	289.463	373.583	155.844	8.97226	270.355	69.9141
1305	454050	'Chardonnay' x V. cinerea B9	right	353.996	-49.592	-384.222	-647.551	176.031	-179.27	-282.501	-141.2	-450.688	-19.8772	-100.056	289.08	-90.0584	339.136	307.325	362.407	170.812	-3.35342	299.362	50.2194
1306	454050	'Chardonnay' x V. cinerea B9	right	300.971	-25.2016	-425.515	-696.03	166.222	-159.456	-208.045	-131.706	-462.085	-24.0856	-67.4389	282.055	-54.8525	315.356	293.78	375.732	174.624	3.98799	282.339	59.3487
1307	454050	'Chardonnay' x V. cinerea B9	right	327.032	-27.8296	-395.589	-723.122	165.156	-162.525	-251.835	-126.633	-438.115	0.531981	-65.4177	279.468	-31.8778	347.382	271.351	355.708	149.039	10.402	270.256	46.6179
1308	454050	'Chardonnay' x V. cinerea B9	right	342.766	-45.1412	-382.587	-665.361	180.01	-156.077	-268.197	-129.622	-485.514	-20.6771	-80.9738	296.999	-59.8477	330.461	271.429	349.572	188.108	-2.6878	294.806	42.5342
1309	454051	'Chardonnay' x V. cinerea B9	right	311.692	-35.5849	-357.807	-676.164	148.631	-170.02	-301.836	-148.016	-452.793	-49.5967	-67.9124	294.569	-49.187	374.453	336.454	359.423	159.636	5.53905	273.122	45.3968
1310	454051	'Chardonnay' x V. cinerea B9	right	314.989	-15.5825	-375.026	-664.621	149.913	-191.726	-344.637	-145.469	-396.092	-66.249	-75.0199	305.68	-49.1223	351.833	342.024	370.682	151.817	-10.9324	281.155	66.384
1311	454051	'Chardonnay' x V. cinerea B9	right	302.165	-35.1269	-372.547	-723.254	133.292	-185.561	-179.547	-129.708	-463.583	20.7603	-89.599	303.212	-35.9198	358.254	290.44	354.9	154.07	-12.1962	261.229	48.719
1312	454051	'Chardonnay' x V. cinerea B9	right	304.714	-21.6455	-366.486	-702.179	182.981	-139.888	-278.816	-119.806	-466.736	-12.4744	-97.6211	287.099	-46.7932	323.788	335.157	345.47	152.569	9.34831	281.032	30.2882
1313	454051	'Chardonnay' x V. cinerea B9	right	294.942	-32.6803	-332.726	-670.255	130.541	-171.494	-292.727	-155.985	-484.673	-76.1486	-64.5947	307.192	-6.49032	376.327	358.232	350.126	132.386	13.0299	265.11	59.8892
1314	454051	'Chardonnay' x V. cinerea B9	right	322.982	-46.2296	-370.419	-645.276	174.481	-188.471	-291.524	-147.113	-438.721	-27.8912	-108.302	305.247	-85.6076	354.729	325.562	371.534	169.578	-7.4249	301.969	30.8951
1315	454052	'Chardonnay' x V. cinerea B9	right	337.235	-11.3348	-435.176	-622.459	129.672	-216.58	-141.381	-165.524	-484.45	-73.482	-71.9333	293.28	-67.5447	348.773	312.462	381.506	154.359	-13.7379	266.757	79.5582
1316	454052	'Chardonnay' x V. cinerea B9	right	290.253	12.2739	-403.803	-683.727	103.839	-190.896	-183.578	-152.856	-481.802	-84.0877	14.8685	211.019	-25.4885	419.155	321.133	359.324	126.141	11.4858	238.436	98.3089
1317	454052	'Chardonnay' x V. cinerea B9	right	293.466	-32.0093	-353.963	-683.94	119.519	-185.814	-92.3582	-103.994	-531.65	-26.6596	-74.3307	270.352	-82.1761	400.341	335.848	320.096	122.532	4.97785	263.113	36.6494
1318	454052	'Chardonnay' x V. cinerea B9	right	274.437	-9.00095	-369.407	-725.25	103.778	-199.946	-67.1741	-99.0967	-521.664	-4.16726	-11.966	232.397	-41.2922	378.265	306.488	337.563	98.9354	13.1599	227.865	76.0758
1319	454052	'Chardonnay' x V. cinerea B9	right	317.79	-2.59094	-443.07	-706.817	109.292	-201.083	-158.282	-111.828	-438.381	-37.1264	-19.3347	234.164	-68.6657	332.767	293.445	396.307	133.489	16.3601	273.717	79.8467
1320	454052	'Chardonnay' x V. cinerea B9	right	308.134	-22.9205	-331.481	-714.311	141.875	-197.69	-197.354	-134.517	-525.297	46.6017	-14.5546	230.215	-48.9726	369.911	296.953	345.756	123.748	8.11154	246.949	68.8431
1321	454053	'Chardonnay' x V. cinerea B9	right	291.969	-28.1749	-331.577	-679.153	151.054	-167.368	-304.287	-150.75	-448.284	-18.6853	-80.3241	306.64	-54.5079	349.242	362.139	387.995	140.295	1.56978	273.522	-1.31458
1322	454053	'Chardonnay' x V. cinerea B9	right	293.911	-25.9367	-345.585	-702.376	161.15	-179.602	-279.046	-145.149	-481.089	-12.3221	-42.3683	297.679	-0.658356	375.996	272.173	360.15	169.131	0.354404	252.382	31.2051
1323	454053	'Chardonnay' x V. cinerea B9	right	290.899	-26.0585	-338.735	-655.489	149.785	-168.626	-276.644	-164.771	-503.71	-36.345	-74.0174	307.964	-46.764	359.373	339.928	359.837	178.529	-3.84459	280.73	27.9601
1324	454053	'Chardonnay' x V. cinerea B9	right	312.398	-34.4407	-368.44	-670.946	177.083	-162.378	-264.342	-144.769	-463.524	-15.9977	-106.345	298.039	-69.2223	343.325	340.211	362.869	153.312	1.35915	288.869	22.9391
1325	454053	'Chardonnay' x V. cinerea B9	right	286.124	-32.3781	-332.996	-681.623	145.455	-169.636	-270.333	-158.235	-489.061	-38.8995	-54.5941	296.199	-24.003	378.277	345.951	373.296	129.934	9.59413	263.523	23.4052
1326	454053	'Chardonnay' x V. cinerea B9	right	309.062	-58.932	-338.942	-584.711	161.676	-198.681	-268.363	-215.219	-508.296	-22.8051	-84.9264	285.599	-48.207	372.657	323.389	416.454	174.364	-28.2858	280.243	33.9233
1327	454054	'Chardonnay' x V. cinerea B9	right	333.061	-22.9667	-428.257	-700.233	163.134	-170.484	-159.676	-115.143	-470.915	-19.218	-51.7777	232.783	-58.051	370.007	275.124	366.944	141.55	0.613782	255.807	57.6974
1328	454054	'Chardonnay' x V. cinerea B9	right	327.115	-2.78376	-432.772	-701.59	114.133	-168.709	-196.437	-126.333	-462.376	-58.2137	7.61884	202.633	-36.4945	375.119	272.689	376.042	147.813	17.3699	258.712	86.4665
1329	454054	'Chardonnay' x V. cinerea B9	right	270.669	-19.5221	-357.688	-718.918	118.225	-197.291	-87.8843	-109.592	-522.888	3.55393	-13.6094	230.595	-51.7474	398.954	307.782	344.027	100.96	13.7846	236.182	54.4084
1330	454054	'Chardonnay' x V. cinerea B9	right	267.392	-9.79635	-391.897	-748.61	118.689	-179.456	-182.112	-128.426	-426.277	-37.5959	-47.0564	317.803	-17.585	368.056	327.834	345.857	128.536	6.20913	222.475	65.9604
1331	454054	'Chardonnay' x V. cinerea B9	right	265.926	-30.3243	-350.603	-698.401	122.474	-191.964	-164.064	-153.946	-516.906	-32.7547	-26.8682	266.421	-12.0135	405.037	329.915	358.686	118.285	4.79481	233.855	72.4511
1332	454054	'Chardonnay' x V. cinerea B9	right	329.857	-20.5319	-490.856	-643.248	165.879	-184.802	-118.151	-126.613	-439.722	-58.6722	-77.9987	242.25	-84.2329	344.163	254.553	390.022	169.704	-0.80569	290.967	58.238
1333	454055	'Chardonnay' x V. cinerea B9	right	249.618	-31.5911	-323.272	-689.381	84.6415	-205.325	-162.365	-135.902	-525.019	-69.2688	-25.5809	285.323	2.59392	416.01	340.938	358.776	115.527	11.8716	242.918	59.4879
1334	454055	'Chardonnay' x V. cinerea B9	right	293.431	-11.7295	-389.714	-688.71	141.841	-181.964	-223.329	-133.623	-476.559	-50.3058	-55.8005	261.04	-51.3061	357.363	353.669	372.932	143.975	1.62234	263.795	73.3759
1335	454055	'Chardonnay' x V. cinerea B9	right	357.401	-2.17084	-506.305	-612.825	173.798	-186.274	-224.044	-168.04	-369.418	-70.4659	-89.7997	233.326	-96.2865	314.439	296.629	403.004	165.038	3.58976	292.987	85.4174
1336	454055	'Chardonnay' x V. cinerea B9	right	324.4	-6.531	-408.394	-637.76	150.16	-192.594	-258.185	-170.778	-452.052	-87.0261	-66.7707	276.562	-49.3746	384.992	335.706	373.227	158.015	-8.26696	266.495	68.1753
1337	454055	'Chardonnay' x V. cinerea B9	right	337.825	-28.981	-382.259	-670.11	141.384	-179.41	-267.709	-145.972	-476.484	-62.6598	-51.3902	291.351	-37.41	364.979	301.842	355.011	159.061	13.7528	275.139	62.04
1338	454055	'Chardonnay' x V. cinerea B9	right	318.377	-31.1335	-354.554	-650.025	117.449	-220.259	-158.457	-141.126	-531.848	-72.6715	-62.9057	314.101	-31.6024	389.653	327.067	343.187	131.682	3.09357	244.792	65.1789
1339	454056	'Chardonnay' x V. cinerea B9	right	308.204	-40.7958	-373.448	-667.61	160.385	-162.243	-324.749	-159.756	-408.806	-45.1963	-89.0525	302.32	-58.8478	342.035	357.485	382.23	154.208	3.99333	274.62	45.022
1340	454056	'Chardonnay' x V. cinerea B9	right	280.579	-13.8863	-375.682	-665.552	155.761	-161.942	-335.222	-178.016	-417.304	-77.9251	-47.3408	305.17	-32.0288	361.365	355.662	374.918	156.687	-2.11506	258.889	57.9842
1341	454056	'Chardonnay' x V. cinerea B9	right	281.897	-24.5611	-352.52	-702.954	158.328	-163.082	-299.137	-154.318	-453.446	-26.7997	-61.0466	307.844	-31.4344	359.151	333.668	343.298	157.964	9.8004	265.727	51.6205
1342	454056	'Chardonnay' x V. cinerea B9	right	311.471	-6.76173	-381.176	-701.274	165.029	-171.353	-304.214	-145.539	-419.466	-16.6802	-67.4527	288.326	-53.0635	354.046	319.097	355.21	157.653	-2.75179	272.123	46.7787
1343	454056	'Chardonnay' x V. cinerea B9	right	290.502	-31.1756	-300.111	-698.622	146.195	-157.744	-319.109	-148.401	-475.735	-9.72089	-77.2102	304.435	-24.2167	370.355	354.852	323.092	148.12	-1.82857	256.713	49.6103
1344	454056	'Chardonnay' x V. cinerea B9	right	309.776	-33.342	-358.748	-708.285	173.624	-161.196	-295.367	-130.963	-441.338	-5.27096	-72.4747	305.26	-52.4919	344.671	316.854	347.024	140.277	-2.06601	279.888	44.1678
1345	454057	'Chardonnay' x V. cinerea B9	right	342.334	-2.79192	-429.52	-641.044	168.036	-155.981	-301.155	-163.58	-426.974	-62.0936	-93.0145	277.906	-64.8223	313.063	315.327	362.295	184.26	18.8893	305.529	53.3375
1346	454057	'Chardonnay' x V. cinerea B9	right	369.854	-35.8725	-372.429	-543.226	140.039	-181.445	-319.334	-181.445	-477.976	-79.5534	-110.22	257.528	-88.1646	344.201	322.949	388.268	202.464	-8.65849	332.816	40.2024
1347	454057	'Chardonnay' x V. cinerea B9	right	332.329	-52.63	-352.57	-645.247	198.491	-160.612	-319.906	-147.44	-466.192	-38.1905	-78.8558	304.132	-52.2968	367.913	299.685	363.23	154.282	-15.9098	285.034	24.7534
1348	454057	'Chardonnay' x V. cinerea B9	right	402.168	30.6329	-461.49	-582.477	189.1	-191.958	-310.849	-162.69	-392.346	-23.5412	-125.688	228.794	-92.7557	273.101	256.194	349.983	189.761	-0.646441	345.905	78.8013
1349	454057	'Chardonnay' x V. cinerea B9	right	330.211	-14.7275	-386.025	-709.322	145.387	-177.744	-323.827	-120.749	-404.398	-25.8864	-57.0954	282.851	-45.2698	325.519	305.028	360.075	156.652	4.46503	279.335	75.5186
1350	454057	'Chardonnay' x V. cinerea B9	right	339.911	-34.4608	-387.629	-643.568	150.226	-172.202	-299.161	-149.761	-440.47	-81.8105	-74.8885	303.096	-59.9724	359.029	326.9	374.932	153.507	0.302853	291.576	44.443
1351	454058	'Chardonnay' x V. cinerea B9	right	340.812	-31.6314	-394.576	-654.078	176.003	-169.576	-279.667	-139.174	-463.733	-38.1273	-80.5193	284.434	-67.2559	341.729	296.068	369.139	182.495	-6.98394	290.373	44.2682
1352	454058	'Chardonnay' x V. cinerea B9	right	342.248	-2.27298	-402.458	-664.686	190.768	-146.759	-274.485	-147.982	-499.546	-31.0117	-37.9511	260.32	-60.1197	336.257	273.187	323.683	188.251	7.70923	280.106	64.7415
1353	454058	'Chardonnay' x V. cinerea B9	right	331.791	16.4763	-461.612	-717.578	191.851	-135.794	-237.079	-114.057	-427.311	21.6854	-42.7188	220.221	-46.4018	274.379	220.702	346.951	188.3	7.52619	282.478	80.1899
1354	454058	'Chardonnay' x V. cinerea B9	right	304.983	-40.6826	-358.06	-711.184	136.22	-182.922	-199.922	-120.229	-492.215	7.44574	-57.3445	295.795	-58.5248	363.404	292.584	349.679	174.228	-14.4242	258.052	53.118
1355	454058	'Chardonnay' x V. cinerea B9	right	304.128	-4.81469	-383.407	-705.013	162.996	-160.383	-274.935	-134.268	-476.053	-19.2647	-29.1598	270.142	-46.8269	340.016	295.933	349.46	178.76	2.95076	268.565	61.1744
1356	454058	'Chardonnay' x V. cinerea B9	right	317.841	-34.4325	-380.133	-653.704	165.23	-168.549	-285.642	-172.813	-470.317	-77.7956	-53.3319	322.463	-23.5753	371.816	306.315	351.049	162.251	0.494253	261.362	61.4718
1357	454059	'Chardonnay' x V. cinerea B9	right	301.473	5.87352	-401.934	-687.435	132.197	-176.76	-251.335	-149.939	-439.568	-62.8063	-63.7833	281.784	-56.9983	344.131	369.961	361.047	143.688	9.98262	266.299	74.1223
1358	454059	'Chardonnay' x V. cinerea B9	right	243.546	-45.1637	-331.192	-689.667	112.334	-174.84	-101.204	-91.8712	-526.767	-84.6794	-60.6432	337.146	-45.5549	391.891	367.885	326.369	119.229	2.93587	222.366	27.8793
1359	454059	'Chardonnay' x V. cinerea B9	right	287.258	1.85864	-454.939	-721.445	131.61	-174.824	-172.22	-125.591	-410.326	-54.1339	-48.907	275.661	-56.6075	336.577	315.321	368.017	148.226	23.9504	260.585	69.9291
1360	454059	'Chardonnay' x V. cinerea B9	right	285.227	-48.4017	-388.888	-695.176	114.395	-191.865	-115.752	-118.072	-489.824	-61.465	-49.5208	316.654	-42.9501	386.21	301.104	359.101	137.057	-0.327397	249.152	53.3434
1361	454059	'Chardonnay' x V. cinerea B9	right	311.045	-18.9	-414.354	-716.904	162.385	-164.241	-235.636	-110.821	-431.103	-37.4984	-58.5104	274.763	-54.9835	339.302	317.862	371.908	142.512	6.04478	260.782	56.3465
1362	454059	'Chardonnay' x V. cinerea B9	right	330.455	-41.4431	-385.269	-668.84	171.063	-159.448	-257.086	-135.891	-488.873	-48.5952	-51.5565	281.433	-46.8855	353.513	295.699	371.799	147.201	-0.679218	285.25	48.1518
1363	454060	'Chardonnay' x V. cinerea B9	right	318.953	-35.9605	-396.232	-702.948	185.956	-184.516	-257.574	-132.11	-438.572	4.22847	-64.2901	283.46	-58.5746	330.791	287.13	373.37	146.453	19.6368	276.752	44.0479
1364	454060	'Chardonnay' x V. cinerea B9	right	321.883	-17.9979	-364.565	-673.428	134.084	-199.699	-282.178	-153.885	-465.319	-24.9821	-66.1277	304.135	-45.8461	337.912	311.517	372.039	170.229	10.936	286.323	44.9704
1365	454060	'Chardonnay' x V. cinerea B9	right	316.334	-35.19	-360.152	-666.295	165.171	-171.267	-308.563	-157.201	-466.082	-24.2534	-68.3548	286.459	-55.48	333.615	330.38	368.877	147.538	14.6961	299.209	50.5593
1366	454060	'Chardonnay' x V. cinerea B9	right	290.133	-25.3507	-327.707	-690.139	133.006	-192.765	-287.774	-156.24	-464.611	-37.1303	-52.1586	334.586	-36.8308	368.357	341.373	343.637	131.639	13.3758	272.931	41.6694
1367	454060	'Chardonnay' x V. cinerea B9	right	311.266	7.62137	-412.392	-641.808	135.549	-167.891	-279.451	-189.666	-452.037	-99.5908	-55.3469	308.385	-37.3749	336.752	342.22	358.635	163.802	19.0933	283.764	68.4685
1368	454060	'Chardonnay' x V. cinerea B9	right	273.306	-19.8135	-290.584	-721.82	113.75	-170.676	-233.14	-124.991	-493.898	-8.01549	-61.2974	333.253	-48.612	373.027	365.119	310.251	116.979	13.8071	258.377	14.9769
1369	454062	'Chardonnay' x V. cinerea B9	right	318.945	-59.1898	-372.777	-670.002	171.507	-195.04	-315.814	-133.424	-406.682	-43.4721	-81.6058	314.484	-53.9146	378.147	286.697	369.566	166.598	-2.90359	287.046	41.8353
1370	454062	'Chardonnay' x V. cinerea B9	right	323.179	-45.2221	-328.343	-644.422	157.65	-183.286	-319.512	-172.965	-461.299	-21.6976	-91.0399	311.224	-61.1408	367.399	343.098	357.836	150.861	-10.8985	286.548	42.0322
1371	454062	'Chardonnay' x V. cinerea B9	right	327.757	-18.071	-407.052	-640.926	157.996	-190.166	-308.172	-175.817	-419.527	-73.5356	-64.3815	310.436	-46.6264	358.563	299.313	374.217	177.872	-5.11864	282.821	60.4192
1372	454062	'Chardonnay' x V. cinerea B9	right	355.791	-49.1729	-354.223	-567.902	153.868	-189.455	-283.189	-208.195	-490.248	-73.8721	-80.8608	317.098	-90.0493	379.051	336.384	355.753	149.657	-9.49896	302.87	46.1937
1373	454062	'Chardonnay' x V. cinerea B9	right	358.678	-40.6255	-366.921	-638.019	152.682	-178.738	-298.47	-135.702	-456.914	-45.7129	-95.2516	311.94	-73.7158	343.442	301.592	368.993	167.964	-10.6634	310.355	25.0857
1374	454062	'Chardonnay' x V. cinerea B9	right	309.753	-31.4369	-323.237	-687.415	135.67	-196.279	-316.678	-151.051	-459.328	-6.88512	-60.964	305.772	-45.7495	365.291	326.641	344.698	172.05	-8.3592	261.842	65.6661
1375	454063	'Chardonnay' x V. cinerea B9	right	268.347	-3.62771	-402.342	-742.477	145.352	-156.073	-278.145	-149.18	-393.06	-28.2948	-34.3152	303.956	-2.31016	352.89	290.342	359.153	163.439	-1.18749	242.694	64.8408
1376	454063	'Chardonnay' x V. cinerea B9	right	268.779	-30.004	-356.635	-694.418	163.341	-165.516	-285.938	-151.106	-441.816	-57.9035	-55.5882	330.902	-37.9807	373.978	351.797	354.402	147.785	-0.430368	246.256	40.0952
1377	454063	'Chardonnay' x V. cinerea B9	right	302.795	-12.4725	-364.126	-712.81	156.845	-155.245	-283.644	-150.64	-458.871	-11.3256	-62.1125	303.774	-29.0504	350.431	312.748	332.409	167.345	1.75806	258.072	54.1204
1378	454063	'Chardonnay' x V. cinerea B9	right	262.965	-20.855	-340.069	-671.438	130.457	-175.697	-185.665	-154.313	-511.994	-88.37	-52.53	347.709	-40.1198	394.037	375.829	312.811	124.653	9.70864	236.474	46.4065
1379	454063	'Chardonnay' x V. cinerea B9	right	299.225	-31.2301	-364.781	-697.626	171.849	-164.229	-318.434	-167.155	-440.787	-14.2063	-48.7024	310.021	-13.5757	354.482	280.221	353.346	171.909	7.23033	263.075	49.366
1380	454063	'Chardonnay' x V. cinerea B9	right	328.02	0.122261	-423.229	-683.343	152.279	-174.839	-323.23	-142.223	-394.303	-83.0401	-40.1011	300.586	-22.8101	344.317	274.145	351.715	178.625	12.8194	270.605	73.8848
1381	454064	'Chardonnay' x V. cinerea B9	right	248.825	-17.1259	-366.731	-742.199	140.678	-149.61	-227.227	-129.945	-452.667	-26.4706	-49.5078	299.063	-22.9434	349.805	355.043	355.571	133.997	7.43038	240.533	53.4806
1382	454064	'Chardonnay' x V. cinerea B9	right	313.321	-62.0326	-336.984	-665.559	179.439	-157.542	-278.925	-116.012	-488.19	-42.1803	-84.5148	320.683	-70.2241	353.138	334.794	355.002	154.118	-2.28271	277.166	16.7859
1383	454064	'Chardonnay' x V. cinerea B9	right	292.915	-0.537263	-376.677	-683.481	139.537	-160.969	-316.177	-176.898	-452.608	-72.2994	-44.3824	301	1.52571	370.911	306.468	318.75	186.224	30.5007	263.175	73.0229
1384	454064	'Chardonnay' x V. cinerea B9	right	275.617	-25.8679	-362.769	-717.695	171.541	-137.145	-312.621	-125.881	-431.591	-25.0965	-71.7513	310.905	-38.773	340.185	326.001	338.511	179.307	-6.40205	265.039	48.4847
1385	454064	'Chardonnay' x V. cinerea B9	right	308.385	-24.8771	-368.735	-683.337	162.022	-180.942	-249.97	-126.708	-493.082	-20.6955	-87.7475	287.496	-47.1606	333.359	320.798	348.019	163.152	4.58012	292.339	63.1062
1386	454064	'Chardonnay' x V. cinerea B9	right	325.97	13.074	-438.909	-679.225	165.149	-148.805	-293.097	-149.79	-424.745	-39.9002	-70.2464	258.804	-45.3434	298.11	298.584	357.752	187.349	6.62001	295.289	83.3592
1387	454065	'Chardonnay' x V. cinerea B9	right	268.853	-48.6352	-410.802	-685.431	123.549	-184.109	-72.3812	-96.0935	-503.474	-74.2031	-48.759	298.421	-60.2408	350.33	314.429	370.607	136.667	15.3255	252.16	53.788
1388	454065	'Chardonnay' x V. cinerea B9	right	238.591	-23.7805	-338.154	-724.693	118.346	-163.513	-197.598	-149.508	-505.991	-35.1219	-10.4826	300.647	-0.440603	362.771	347.995	361.126	123.383	14.8207	224.351	57.252
1389	454065	'Chardonnay' x V. cinerea B9	right	276.902	-29.1839	-380.446	-712.965	140.598	-167.002	-96.6566	-122.787	-516.247	35.4096	-72.6885	247.749	-62.8712	328.68	322.027	363.812	133.857	12.1453	255.526	44.1416
1390	454065	'Chardonnay' x V. cinerea B9	right	291.87	-36.7317	-361.06	-691.06	140.83	-179.429	-296.023	-164.098	-451.379	-43.0925	-32.481	297.711	-1.0708	377.021	297.824	381.349	158.601	-7.68653	252.889	66.0148
1391	454065	'Chardonnay' x V. cinerea B9	right	311.675	-41.6387	-331.879	-673.166	143.53	-179.804	-312.276	-147.005	-456.243	-39.0019	-67.6621	319.416	-49.4327	364.714	338.178	364.494	148.033	-0.604224	276.077	32.5963
1392	454065	'Chardonnay' x V. cinerea B9	right	259.133	-44.4968	-309.221	-686.293	128.064	-198.595	-277.733	-168.652	-464.93	-30.7421	-37.6027	325.28	-14.723	404.674	329.801	380.924	137.581	-6.43305	249.632	24.3336
1393	454066	'Chardonnay' x V. cinerea B9	right	351.123	-32.1995	-404.421	-677.162	167.612	-157.731	-281.273	-137.873	-438.414	-16.5297	-77.9072	275.804	-85.6958	334.377	293.306	346.953	186.79	7.20189	288.881	57.1592
1394	454066	'Chardonnay' x V. cinerea B9	right	293.394	1.62173	-427.124	-714.926	169.555	-159.708	-274.736	-136.24	-415.264	-23.7116	-47.0946	267.608	-46.7137	332.693	287.821	354.178	194.567	2.2889	265.593	76.1962
1395	454066	'Chardonnay' x V. cinerea B9	right	316.616	-36.1007	-336.631	-685.506	186.854	-175.705	-284.976	-141.78	-498.775	33.2654	-66.8783	303.701	-32.9905	312.651	276.041	360.82	158.414	-9.11499	282.325	37.7702
1396	454066	'Chardonnay' x V. cinerea B9	right	321.516	-26.9809	-419.783	-696.354	199.258	-172.311	-316.865	-99.9358	-374.26	3.25269	-70.4681	253.803	-78.1407	307.319	265.875	391.594	185.796	-9.84616	287.072	49.459
1397	454066	'Chardonnay' x V. cinerea B9	right	326.864	-30.3081	-316.847	-661.713	158.93	-170.158	-309.656	-142.411	-527.772	-5.6199	-60.4773	292.615	-13.4951	323.814	291.903	360.18	167.973	-12.5031	282.578	46.1047
1398	454066	'Chardonnay' x V. cinerea B9	right	293.197	-49.3516	-366.698	-653.187	167.236	-162.953	-264.602	-161.289	-474.08	-43.6718	-73.856	300.587	-66.304	352.565	349.638	394.8	163.773	-1.74752	271.697	24.2482
1399	454067	'Chardonnay' x V. cinerea B9	right	309.775	-18.6856	-368.512	-717.842	155.366	-158.637	-281.321	-144.133	-466.463	9.02399	-49.3238	267.986	-27.0182	351.073	279.378	334.289	167.986	9.97457	280.134	66.9522
1400	454067	'Chardonnay' x V. cinerea B9	right	298.404	-20.2459	-342.652	-676.492	173.113	-173.042	-311.073	-147.103	-480.605	-34.1386	-82.336	303.635	-7.55896	329.088	343.439	363.321	150.51	2.43597	258.758	52.5415
1401	454067	'Chardonnay' x V. cinerea B9	right	313.75	-17.9895	-402.247	-696.674	184.819	-142.736	-277.409	-148.456	-449.043	9.33532	-73.9654	268.321	-49.6449	328.15	272.463	353.105	191.179	4.83632	290.099	42.1081
1402	454067	'Chardonnay' x V. cinerea B9	right	290.858	-27.2482	-328.262	-650.681	150.35	-163.254	-304.131	-190.12	-499.939	-57.1319	-42.9515	313.736	-27.7365	372.736	351.408	348.852	147.56	5.82541	262.844	47.2862
1403	454067	'Chardonnay' x V. cinerea B9	right	321.923	-42.807	-385.592	-662.707	180.146	-176.217	-286.259	-147.752	-445.997	-41.269	-74.961	292.977	-55.6501	369.846	300.386	374.695	164.402	-8.12409	281.602	41.359
1404	454067	'Chardonnay' x V. cinerea B9	right	287.227	-5.69584	-392.578	-700.526	146.236	-155.163	-313.076	-163.389	-426.34	-68.9292	-25.5518	293.603	-7.8128	361.222	310.463	351.195	166.894	10.3059	254.538	77.376
1405	454068	'Chardonnay' x V. cinerea B9	right	308.174	-18.776	-358.976	-710.359	145.574	-178.406	-297.796	-151.111	-458.39	-12.893	-33.319	299.977	-6.81637	352.654	274.061	353.761	162.845	11.3893	264.643	53.7636
1406	454068	'Chardonnay' x V. cinerea B9	right	299.299	-30.8168	-395.045	-653.112	155.602	-159.975	-307.927	-164.704	-430.619	-77.2824	-67.3664	286.96	-55.7902	365.334	338.636	374.778	182.692	-3.60806	280.518	62.4263
1407	454068	'Chardonnay' x V. cinerea B9	right	348.816	-17.0979	-385.472	-653.689	141.681	-191.837	-230.048	-161.882	-461.174	-27.8703	-107.668	302.373	-72.7378	358.367	325.604	356.685	148.454	7.97086	292.545	26.9802
1408	454068	'Chardonnay' x V. cinerea B9	right	325.777	-37.6215	-378.331	-645.392	158.008	-177.221	-295.854	-154.916	-456.064	-52.8699	-64.9332	260.983	-74.7278	359.736	344.154	387.466	147.572	5.24188	294.4	54.5951
1409	454068	'Chardonnay' x V. cinerea B9	right	337.379	-13.9103	-425.956	-670.562	140.187	-190.152	-291.059	-155.566	-410.952	-35.1349	-72.8101	278.13	-45.8503	319.984	277.321	373.138	195.903	7.25361	295.838	86.82
1410	454068	'Chardonnay' x V. cinerea B9	right	347.654	-25.6274	-395.61	-649.966	163.87	-189.062	-279.673	-163.698	-457.94	-13.7991	-88.683	280.029	-61.8172	337.718	284.689	363.711	195.461	3.03356	292.05	57.661
1411	454069	'Chardonnay' x V. cinerea B9	right	307.662	-41.1389	-357.047	-704.587	123.449	-206.054	-239.913	-127.169	-434.535	-31.101	-68.898	337.458	-57.6139	387.024	306.907	348.59	153.548	-0.25021	266.442	37.2273
1412	454069	'Chardonnay' x V. cinerea B9	right	334.28	-17.1628	-374.877	-685.899	141.31	-175.12	-260.819	-125.569	-468.286	-3.49489	-100.971	267.52	-49.4761	330.752	307.932	368.57	173.405	0.852468	297.502	39.5518
1413	454069	'Chardonnay' x V. cinerea B9	right	305.317	-12.3743	-404.269	-675.245	153.459	-158.721	-239.255	-133.751	-485.499	-78.3137	-64.0468	280.129	-31.4375	351.092	320.143	356.378	167.32	7.51339	278.269	63.2931
1414	454069	'Chardonnay' x V. cinerea B9	right	322.858	-39.0449	-337.357	-640.741	168.359	-179.086	-257.686	-172.994	-486.61	11.2306	-118.253	275.575	-76.3728	379.821	342.076	364.127	157.502	-11.2645	285.483	12.3777
1415	454069	'Chardonnay' x V. cinerea B9	right	298.52	-36.2468	-332.818	-673.43	171.12	-157.946	-224.736	-133.509	-516.143	8.09906	-92.2213	276.515	-85.1169	361.369	355.04	348.056	150.161	-15.442	276.194	22.5346
1416	454069	'Chardonnay' x V. cinerea B9	right	273.126	-11.5735	-365.149	-749.399	133.586	-152.952	-179.441	-109.484	-504.643	-0.513435	-30.2145	271.776	-25.1706	323.688	326.17	333.818	126.58	20.2587	245.156	74.3822
1417	454070	'Chardonnay' x V. cinerea B9	right	290.021	-26.3049	-345.774	-667.948	129.796	-178.527	-308.768	-162.989	-463.434	-65.038	-39.1388	311.696	-31.3996	377.108	326.453	370.975	165.078	3.39418	277.166	37.6341
1418	454070	'Chardonnay' x V. cinerea B9	right	268.203	-39.9265	-329.107	-713.548	142.909	-179.682	-266.919	-155.493	-453.819	1.93775	-48.1166	310.808	-40.5756	374.719	335.06	370.837	133.112	4.12877	259.253	26.2189
1419	454070	'Chardonnay' x V. cinerea B9	right	347.616	-11.0235	-401.325	-646.757	152.926	-172.14	-270.549	-143.779	-465.31	-50.9889	-81.2501	278.573	-70.6024	326.763	319.55	377.52	168.809	-3.07148	300.135	44.9036
1420	454070	'Chardonnay' x V. cinerea B9	right	345.367	-28.2906	-408.544	-693.801	172.406	-177.361	-244.416	-124.198	-456.668	-11.4891	-45.9689	260.496	-75.0561	348.052	271.127	349.947	160.533	10.3297	281.22	66.3148
1421	454070	'Chardonnay' x V. cinerea B9	right	296.444	-51.5122	-363.682	-651.32	158.533	-187.387	-287.041	-153.662	-451.113	-65.3633	-67.1226	311.174	-54.6731	370.667	336.345	394.576	147.813	0.763011	284.498	32.0636
1422	454070	'Chardonnay' x V. cinerea B9	right	318.148	-30.9249	-387.613	-723.116	134.762	-180.548	-249.745	-122.154	-441.671	-6.16307	-39.8553	279.93	-47.6783	345.596	278.98	366.124	156.697	7.36352	277.974	63.8925
1423	454071	'Chardonnay' x V. cinerea B9	right	317.947	-18.2468	-396.034	-626.82	202.693	-151.811	-313.768	-188.427	-478.549	-71.7884	-52.9138	294.917	-32.2442	349.083	300.581	351.767	179.771	-0.772748	272.517	62.1
1424	454071	'Chardonnay' x V. cinerea B9	right	306.383	-34.5231	-343.987	-654.407	168.154	-163.352	-267.583	-157.353	-494.43	-22.8891	-110.816	305.581	-54.6051	357.35	346.395	349.236	168.312	-8.45376	282.177	28.8096
1425	454071	'Chardonnay' x V. cinerea B9	right	320.28	-11.086	-409.784	-694.455	173.311	-149.805	-303.033	-132.297	-424.828	-41.6213	-51.0726	273.26	-46.0437	342.012	287.807	366.216	174.715	0.542788	278.648	47.2334
1426	454071	'Chardonnay' x V. cinerea B9	right	304.958	-47.2303	-366.431	-676.289	197.835	-143.693	-296.87	-155.5	-463.14	-19.4629	-76.1979	298.862	-55.5764	340.808	331.302	360.665	162.338	2.9849	261.783	38.8545
1427	454071	'Chardonnay' x V. cinerea B9	right	329.255	13.8901	-443.222	-704.547	181.846	-127.357	-308.775	-129.842	-423.491	-40.387	-11.5877	263.673	-20.089	299.028	217.389	323.577	196.029	16.734	282.647	85.2307
1428	454071	'Chardonnay' x V. cinerea B9	right	298.221	-41.3394	-318.513	-710.081	163.603	-129.657	-311.189	-116.329	-465.868	-15.8862	-72.6321	298.751	-46.5293	372.763	331.264	327.455	152.489	-2.54541	269.156	16.8701
1429	454072	'Chardonnay' x V. cinerea B9	right	330.516	-28.6198	-400.346	-646.038	172.808	-166.442	-266.212	-158.718	-456.749	-69.9105	-80.2578	312.024	-66.4755	368.808	314.532	348.028	172.741	-9.60627	279.444	50.4745
1430	454072	'Chardonnay' x V. cinerea B9	right	303.63	-31.8776	-392.233	-638.693	145.353	-165.43	-274.329	-167.996	-464.729	-101.304	-54.1508	308.503	-45.1274	366.472	330.755	379.349	166.013	2.32129	284.818	48.6546
1431	454072	'Chardonnay' x V. cinerea B9	right	309.013	-28.1783	-312.058	-634.251	152.259	-172.173	-378.35	-186.531	-454.991	-38.362	-43.8639	319.173	-34.1401	360.055	313.594	373.652	152.652	-9.75344	295.886	16.3688
1432	454072	'Chardonnay' x V. cinerea B9	right	309.542	-18.5264	-348.44	-692.052	162.96	-183.585	-338.69	-148.707	-438.702	-16.965	-47.1802	297.037	-28.636	348.118	311.085	363.492	153.446	-8.49365	264.616	59.6832
1433	454072	'Chardonnay' x V. cinerea B9	right	383.055	1.0651	-357.622	-622.67	169.848	-193.603	-360.46	-135.692	-472.081	-29.8444	-75.1183	266.239	-41.448	333.925	250.315	343.629	196.867	-0.187917	306.645	37.1394
1434	454072	'Chardonnay' x V. cinerea B9	right	289.594	-22.5469	-392.644	-703.413	160.795	-156.736	-286.862	-161.256	-437.138	-29.8554	-42.5544	301.329	-24.6357	352.385	289.505	360.375	180.45	-5.30144	263.49	65.0198
1435	454073	'Chardonnay' x V. cinerea B9	right	295.996	-11.9008	-351.833	-718.536	171.54	-150.512	-306.847	-139.569	-453.695	-20.6468	-55.2303	304.452	-19.9011	353.295	323.412	324.527	145.672	1.87151	250.886	57.0197
1436	454073	'Chardonnay' x V. cinerea B9	right	317.482	-23.9176	-369.907	-695.924	145.146	-178.602	-297.607	-159.369	-432.016	-18.2172	-68.9917	298.54	-50.727	346.342	331.354	350.856	148.384	19.7981	276.883	60.494
1437	454073	'Chardonnay' x V. cinerea B9	right	317.013	-34.0535	-385.453	-678.746	164.24	-179.65	-288.298	-138.06	-409.561	-15.4162	-101.401	294.354	-88.9904	347.267	328.107	362.835	158.763	-2.17153	305.579	43.6416
1438	454073	'Chardonnay' x V. cinerea B9	right	297.031	-18.9754	-374.67	-666.567	142.602	-158.791	-294.177	-156.577	-483.775	-71.7811	-33.9952	271.81	-19.5338	361.94	317.207	377.381	176.112	1.76226	273.198	59.7975
1439	454073	'Chardonnay' x V. cinerea B9	right	337.22	-26.8688	-370.026	-686.25	158.622	-185.772	-270.142	-136.355	-462.168	15.5127	-65.4262	272.799	-72.9522	338.376	291.57	373.304	166.464	1.05088	286.838	34.204
1440	454073	'Chardonnay' x V. cinerea B9	right	340.956	-33.6512	-387.156	-657.692	179.619	-165.324	-258.964	-138.363	-461.827	-8.44217	-95.3874	282.35	-99.1121	352.498	290.673	345.559	170.839	0.0264269	320.359	23.0396
1441	454074	'Chardonnay' x V. cinerea B9	right	310.484	-25.1681	-374.295	-695.507	132.12	-186.197	-141.645	-116.192	-499.82	-19.7437	-93.1814	320.789	-53.6033	353.625	307.986	340.274	138.467	0.355396	273.488	27.7632
1442	454074	'Chardonnay' x V. cinerea B9	right	320.401	-31.0897	-422.151	-692.171	128.13	-191.5	-159.332	-141.731	-466.863	-29.6884	-60.1068	265.799	-19.8744	360.91	268.927	387.175	138.062	-1.7039	272.806	74.0006
1443	454074	'Chardonnay' x V. cinerea B9	right	317.452	-35.5305	-371.994	-663.654	147.661	-181.483	-233.273	-153.963	-506.418	-45.5677	-45.8118	304.901	-48.5704	349.951	312.299	367.752	153.933	-1.55166	274.723	59.1462
1444	454074	'Chardonnay' x V. cinerea B9	right	340.713	-14.5716	-400.538	-631.655	165.613	-171.2	-307.763	-167.992	-451.925	-62.3642	-72.0601	293.923	-60.6883	352.687	296.44	355.209	206.032	-17.4664	284.175	63.4302
1445	454074	'Chardonnay' x V. cinerea B9	right	305.395	-28.501	-372.992	-681.741	164.589	-161.101	-316.294	-163.636	-442.772	-28.7034	-56.0949	289.434	-42.1931	353.877	313.444	364.444	169.562	0.543892	277.357	55.3842
1446	454074	'Chardonnay' x V. cinerea B9	right	337.438	-30.055	-311.815	-624.378	164.569	-185.119	-337.731	-177.923	-503.977	-29.1608	-73.8761	304.48	-31.2232	346.887	327.053	354.667	137.137	1.55858	292.425	39.0434
1447	454075	'Chardonnay' x V. cinerea B9	right	349.176	-15.0118	-449.337	-653.82	149.949	-184.066	-144.42	-121.379	-467.394	-67.6965	-99.647	285.712	-75.9479	351.428	287.131	343.659	171.236	3.87623	279.255	57.2974
1448	454075	'Chardonnay' x V. cinerea B9	right	324.538	15.7588	-458.74	-615.553	83.0191	-200.913	-24.8916	-40.3684	-516.163	-145.685	-30.7398	181.293	-79.3738	353.176	290.871	358.141	157.546	7.44862	253.934	86.7016
1449	454075	'Chardonnay' x V. cinerea B9	right	323.065	-1.3407	-395.184	-632.587	123.015	-174.456	-141.246	-111.072	-571.172	-83.6304	35.7403	174.167	-62.7946	370.673	286.112	373.547	121.923	12.7749	280.541	71.9238
1450	454075	'Chardonnay' x V. cinerea B9	right	337.343	0.674728	-459.819	-651.756	160.424	-151.265	-214.973	-129.366	-460.146	-87.5537	-57.9802	247.5	-69.1767	324.781	309.2	381.275	182.181	0.484249	272.947	65.2249
1451	454075	'Chardonnay' x V. cinerea B9	right	308.817	-10.0307	-421.34	-685.642	149.276	-156.232	-67.927	-96.6256	-542.081	-27.2552	-47.6456	228.044	-59.294	336.815	283.127	341.518	141.583	14.0745	255.485	55.3338
1452	454075	'Chardonnay' x V. cinerea B9	right	308.05	-9.82613	-392.266	-678.13	150.511	-162.558	-280.955	-135.024	-455.937	-73.8034	-72.5018	297.18	-19.523	362.714	306.126	357.892	181.855	-14.6856	274.641	56.2398
1453	454077	'Chardonnay' x V. cinerea B9	right	297.809	-36.7988	-344.29	-679.464	135.776	-170.56	-283.965	-149.85	-489.363	-80.4224	-32.9022	309.975	-9.20487	378.831	330.753	344.31	135.766	13.3828	259.62	70.5963
1454	454077	'Chardonnay' x V. cinerea B9	right	313.07	-41.6465	-345.515	-676.659	185.719	-163.268	-282.266	-153.923	-478.211	-17.5913	-80.0815	304.402	-47.0099	387.617	314.929	329.068	158.934	-10.216	260.431	42.2162
1455	454077	'Chardonnay' x V. cinerea B9	right	294.155	36.8643	-409.561	-757.625	166.187	-153.981	-285.643	-107.573	-402.771	-30.8901	-30.8529	284.112	-13.9722	348.822	265.345	270.484	168.007	24.4261	249.107	85.3616
1456	454077	'Chardonnay' x V. cinerea B9	right	310.119	-39.4036	-275.902	-625.799	132.622	-199.871	-284.358	-158.635	-530.38	-36.8022	-61.6278	294.329	-67.1461	421.893	352.65	328.399	155.019	-20.201	269.003	36.0915
1457	454077	'Chardonnay' x V. cinerea B9	right	299.361	-55.6409	-346.399	-676.684	176.45	-180.675	-261.552	-143.365	-480.476	-46.1345	-65.8758	327.663	-38.9194	411.414	293.262	318.25	171.898	0.912571	252.25	44.26
1458	454077	'Chardonnay' x V. cinerea B9	right	302.652	-34.8847	-343.936	-660.579	157.631	-181.35	-282.532	-150.725	-493.254	-25.2054	-62.1055	269.848	-69.7395	364.372	350.118	368.285	167.605	-1.48445	273.561	51.7235
1459	454078	'Chardonnay' x V. cinerea B9	right	339.007	5.17626	-452.444	-685.435	191.387	-163.798	-289.966	-127.55	-418.742	-40.7095	-17.45	268.525	15.7935	303.964	159.181	358.438	193.425	19.3836	279.809	62.0046
1460	454078	'Chardonnay' x V. cinerea B9	right	328.38	-18.4829	-323.169	-665.296	131.256	-200.51	-324.16	-152.154	-472.399	-14.395	-70.2604	293.463	-37.513	355.908	321.88	360.359	158.663	-12.7737	287.323	53.8816
1461	454078	'Chardonnay' x V. cinerea B9	right	282.051	-25.0979	-373.58	-697.895	126.056	-204.749	-156.581	-141.543	-493.526	-15.3921	-70.4212	292.658	-27.1874	368.929	314.633	375.571	144.556	-0.795312	254	48.3148
1462	454078	'Chardonnay' x V. cinerea B9	right	338.084	-39.5323	-401.628	-683.522	162.342	-168.815	-312.742	-128.035	-410.232	-32.5588	-64.0618	280.892	-43.445	336.326	262.681	384.838	165.414	4.54252	303.588	45.8644
1463	454078	'Chardonnay' x V. cinerea B9	right	330.685	-34.0235	-438.356	-675.329	146.105	-181.502	-216.792	-123.916	-435.932	-69.5144	-63.4278	273.366	-46.45	355.538	278.64	393.723	171.472	1.65186	274.056	60.0062
1464	454078	'Chardonnay' x V. cinerea B9	right	294.77	-21.0717	-419.421	-684.329	95.6325	-185.419	-161.895	-114.208	-443.934	-116.208	-77.181	309.703	-23.7191	373.463	332.139	371.567	144.101	0.565079	259.509	65.9376
1465	454079	'Chardonnay' x V. cinerea B9	right	313.2	-26.1219	-390.93	-694.753	132.742	-203.247	-179.336	-123.566	-485.918	-17.2078	-72.2413	288.217	-32.4617	352.656	277.49	372.225	160.366	-2.48359	277.089	54.2812
1466	454079	'Chardonnay' x V. cinerea B9	right	366.789	-17.8369	-386.506	-688.142	138.131	-204.199	-141.697	-114.847	-498.111	70.3204	-93.3476	228.467	-68.9677	334.356	235.647	342.404	162.237	-10.6193	285.824	60.0976
1467	454079	'Chardonnay' x V. cinerea B9	right	355.862	-11.1264	-449.834	-636.787	94.311	-222.418	-106.989	-129.294	-458.355	-42.1358	-97.971	274.212	-88.5859	325.018	276.098	381.892	174.691	-9.80143	300.774	70.4415
1468	454079	'Chardonnay' x V. cinerea B9	right	359.763	-21.1158	-452.773	-631.952	145.508	-234.75	-181.261	-129.905	-433.28	-24.8688	-94.5678	238.919	-79.74	320.153	265.838	419.419	168.554	-7.42937	301.958	71.5308
1469	454079	'Chardonnay' x V. cinerea B9	right	332.087	-6.95833	-423.788	-683.62	137.765	-199.66	-91.5428	-127.018	-492.403	10.6451	-74.184	257.608	-56.854	337.842	266.671	375.746	145.316	-13.4594	256.933	48.8746
1470	454079	'Chardonnay' x V. cinerea B9	right	314.671	-35.8758	-376.174	-701.253	114.614	-194.449	-153.169	-134.645	-507.255	-19.8432	-64.6436	291.534	-15.1106	364.152	285.723	348.549	140.492	9.41493	260.851	72.4165
1471	454080	'Chardonnay' x V. cinerea B9	right	357.546	-15.6992	-406.659	-681.758	179.269	-177.088	-293.137	-106.81	-410.595	5.50514	-106.14	255.785	-90.1185	312.207	297.087	355.589	177.554	-14.3312	295.194	66.6008
1472	454080	'Chardonnay' x V. cinerea B9	right	310.672	-28.9896	-372.177	-693.841	164.884	-163.372	-295.633	-157.455	-469.013	-37.2247	-46.5094	305.067	-4.64452	350.816	288.042	339.966	171.049	8.71299	253.33	76.3204
1473	454080	'Chardonnay' x V. cinerea B9	right	353.146	-33.3215	-406.073	-634.942	169.695	-175.395	-275.495	-161.348	-456.847	-41.4962	-86.4734	283.487	-83.9496	336.903	303.911	359.988	174.3	6.87996	307.786	59.2461
1474	454080	'Chardonnay' x V. cinerea B9	right	360.434	-23.166	-422.821	-674.747	155.616	-187.622	-214.66	-101.639	-466.746	-8.21192	-32.2604	246.721	-91.7845	299.338	247.002	396.453	156.313	10.5223	308.907	42.3513
1475	454080	'Chardonnay' x V. cinerea B9	right	321.42	-15.8805	-406.993	-679.158	101.644	-213.556	-176.343	-136.249	-472.15	-71.5378	-44.7609	313.2	-31.3358	365.543	283.411	364.634	163.831	-1.20951	261.277	74.2133
1476	454080	'Chardonnay' x V. cinerea B9	right	328.174	0.405215	-437.862	-651.933	169.893	-191.597	-255.256	-163.813	-429.99	-46.7061	-83.4352	282.162	-63.6222	333.981	295.168	371.598	178.751	10.3603	298.179	55.542
1477	454081	'Chardonnay' x V. cinerea B9	right	327.396	-34.9067	-396.054	-651.653	164.259	-174.11	-299.736	-167.138	-448.275	-55.6381	-63.7675	301.446	-52.5059	346.193	299.621	367.375	184.783	12.8804	284.28	55.5518
1478	454081	'Chardonnay' x V. cinerea B9	right	314.111	-13.497	-418.068	-638.857	145.169	-157.457	-295.986	-184.261	-444.74	-89.0139	-55.7044	274.209	-37.3921	342.398	323.909	385.961	182.038	18.2222	286.664	62.2948
1479	454081	'Chardonnay' x V. cinerea B9	right	319.437	-27.39	-426.419	-658.248	181.728	-162.514	-279.313	-175.915	-415.193	-49.21	-76.8038	295.808	-62.775	339.07	315.917	379.391	164.23	3.68546	279.193	55.322
1480	454081	'Chardonnay' x V. cinerea B9	right	328.18	11.0774	-417.352	-704.366	166.53	-148.315	-300.164	-162.725	-415.499	6.62314	-63.2275	267.8	-46.7745	312.505	275.755	335.814	177.612	15.7316	294.939	65.8559
1481	454081	'Chardonnay' x V. cinerea B9	right	329.79	-7.91524	-400.176	-660.581	162.9	-158.363	-298.649	-158.367	-459.599	-47.0809	-68.5401	266.107	-47.3311	317.716	329.696	377.555	172.994	16.4393	278.916	54.4903
1482	454081	'Chardonnay' x V. cinerea B9	right	327.176	-31.8208	-436.518	-593.29	183.524	-155.229	-267.262	-190.747	-443.749	-114.589	-84.6455	307.035	-63.0752	352.382	321.523	380.42	185.319	-1.38268	277.708	47.2214
1483	454082	'Chardonnay' x V. cinerea B9	right	309.47	-24.7642	-366.661	-669.072	143.491	-180.539	-278.037	-140.548	-457.558	-83.4711	-50.6715	301.288	-16.0254	401.653	306.909	381.73	147.117	-7.51414	261.966	21.2374
1484	454082	'Chardonnay' x V. cinerea B9	right	331.34	-26.6285	-358.348	-641.721	128.511	-189.398	-293.499	-169.54	-479.258	-38.9329	-63.0177	294.524	-52.3864	346.495	321.229	383.961	175.402	-16.7614	290.025	58.0006
1485	454082	'Chardonnay' x V. cinerea B9	right	311.128	-9.31673	-387.117	-698.102	141.499	-169.789	-312.316	-143.084	-424.637	-55.8111	-56.3914	301.236	-34.8095	345.975	317.81	341.144	175.996	17.1743	268.839	70.5728
1486	454082	'Chardonnay' x V. cinerea B9	right	299.177	-36.3746	-350.081	-623.728	126.328	-191.766	-219.386	-165.37	-517.25	-101.202	-53.3409	318.999	-47.1954	398.203	350.604	364.618	145.07	-5.53415	266.074	42.1551
1487	454082	'Chardonnay' x V. cinerea B9	right	346.533	-45.655	-393.681	-649.094	170.081	-175.199	-246.682	-142.493	-461.564	-40.0767	-94.6274	308.765	-79.47	351.437	301.358	364.447	163.096	-9.32891	294.956	37.1978
1488	454082	'Chardonnay' x V. cinerea B9	right	317.251	-30.2387	-354.769	-658.327	142.497	-172.914	-340.535	-156.896	-445.267	-93.4737	-40.0795	310.145	-16.3744	382.451	319.455	352.157	147.187	-0.298462	270.635	67.3938
1489	454083	'Chardonnay' x V. cinerea B9	right	334.487	-11.7847	-433.976	-666.486	146.079	-194.789	-231.647	-121.085	-429.401	-33.9223	-94.5046	255.353	-69.7018	310.898	305.616	406.532	175.785	-3.14215	297.263	58.4266
1490	454083	'Chardonnay' x V. cinerea B9	right	326.023	-24.7258	-394.495	-624.331	147.461	-176.577	-230.59	-145.106	-510.98	-81.9599	-58.0582	263.251	-42.9412	363.78	300.375	401.828	167.852	-12.1354	295.354	35.9759
1491	454083	'Chardonnay' x V. cinerea B9	right	316.678	4.48673	-471.755	-658.86	137.051	-184.975	-171.655	-124.935	-450.867	-85.0136	-17.051	210.272	-79.2766	343.556	300.604	398.381	161.589	7.36585	274.683	89.7235
1492	454083	'Chardonnay' x V. cinerea B9	right	315.257	-27.1388	-398.442	-687.595	145.869	-176.326	-233.596	-117.061	-458.351	-52.2088	-77.0398	272.716	-55.7247	364.83	319.817	365.699	160.092	-6.93231	282.119	64.0177
1493	454083	'Chardonnay' x V. cinerea B9	right	354.856	-4.98251	-447.101	-641.945	167.093	-171.02	-267.494	-143.748	-420.98	-41.0086	-75.1836	229.302	-107.758	326.648	300.877	376.082	183.27	12.2721	312.422	58.4006
1494	454083	'Chardonnay' x V. cinerea B9	right	290.49	-40.0027	-374.061	-691.253	107.349	-186.379	-83.2413	-101.302	-519.164	-24.7307	-46.4407	237.651	-65.2852	390.896	315.373	376.136	118.044	0.052985	256.935	38.931
1495	454084	'Chardonnay' x V. cinerea B9	right	307.009	-18.5228	-415.274	-686.483	169.628	-159.431	-286.763	-141.855	-426.887	-61.3242	-56.8995	274.741	-23.4895	357.824	298.535	379.233	174.823	-12.3364	259.318	68.1531
1496	454084	'Chardonnay' x V. cinerea B9	right	346.22	-21.8565	-452.799	-637.242	196.348	-154.355	-272.699	-141.418	-431.714	-39.1907	-79.0763	251.781	-84.1216	303.262	271.873	383.196	203.487	-15.0545	302.481	70.8779
1497	454084	'Chardonnay' x V. cinerea B9	right	328.11	-44.1007	-380.268	-636.877	174.786	-165.959	-310.002	-163.704	-448.77	-53.8044	-88.601	296.12	-51.4666	361.404	306.774	377.789	171.682	-6.16575	297.756	35.2978
1498	454084	'Chardonnay' x V. cinerea B9	right	325.001	-31.9079	-364.872	-669.705	171.523	-142.018	-306.555	-148.117	-477.705	-1.33228	-80.2241	263.717	-50.0305	323.551	303.401	370.651	176.061	-3.14679	303.402	38.3076
1499	454084	'Chardonnay' x V. cinerea B9	right	330.549	-41.6128	-400.348	-634.9	170.546	-158.094	-294.403	-153.426	-446.186	-71.164	-96.294	282.416	-59.6653	342.036	331.076	386.592	170.094	3.57396	294.63	44.5786
1500	454084	'Chardonnay' x V. cinerea B9	right	330.495	-32.0815	-379.567	-638.292	189.452	-156.424	-303.659	-150.151	-480.877	-49.957	-70.2004	285.138	-71.182	350.479	307.579	352.213	184.856	-9.54432	293.102	48.6197
1501	454085	'Chardonnay' x V. cinerea B9	right	347.664	-40.9678	-388.006	-603.62	140.498	-174.985	-299.772	-167.964	-476.025	-107.287	-56.1663	294.433	-46.261	348.67	312.599	390.113	166.687	5.7087	298.782	55.8986
1502	454085	'Chardonnay' x V. cinerea B9	right	307.603	-18.9643	-364.382	-704.442	156.48	-168.97	-298.383	-140.302	-451.782	-22.4138	-54.9072	295.096	-40.1315	347.909	319.317	347.257	156.302	3.39866	269.885	61.4322
1503	454085	'Chardonnay' x V. cinerea B9	right	351.363	9.04579	-447.023	-707.396	186.903	-162.497	-237.761	-105.997	-437.97	10.8611	-78.999	246.893	-32.126	272.412	226.368	335.437	168.957	21.592	300.288	79.6482
1504	454085	'Chardonnay' x V. cinerea B9	right	332.248	-9.65899	-402.08	-665.593	169.722	-154.911	-303.801	-159.575	-467.503	-58.8588	-35.8859	271.702	-38.48	336.155	297.597	352.735	164.558	16.7429	283.626	71.2616
1505	454085	'Chardonnay' x V. cinerea B9	right	349.291	13.7051	-463.916	-689.127	179.598	-160.035	-277.739	-138.633	-391.247	-37.681	-61.855	261.036	-54.876	306.411	275.011	349.814	179.644	3.77272	266.09	90.7365
1506	454085	'Chardonnay' x V. cinerea B9	right	322.138	-43.7862	-367.384	-685.21	183.028	-157.115	-307.549	-137.409	-468.069	-28.3524	-52.1902	295.111	-30.63	345.867	280.925	352.692	156.493	1.81941	283.239	56.3834
1507	454086	'Chardonnay' x V. cinerea B9	right	307.25	-43.5508	-424.781	-694.614	162.052	-169.181	-260.757	-134.859	-415.11	-69.6661	-45.1194	305.234	-40.7877	356.719	283.002	367.38	167.681	6.09527	266.57	76.4424
1508	454086	'Chardonnay' x V. cinerea B9	right	303.904	0.258675	-456.992	-718.363	151.483	-170.03	-252.549	-143.537	-384.99	-32.5071	-30.8628	269.46	-33.1985	323.045	262.025	374.848	179.863	9.3001	261.318	87.5252
1509	454086	'Chardonnay' x V. cinerea B9	right	365.477	11.3243	-484.123	-667.207	142.017	-157.817	-177.608	-125.917	-419.269	-63.7867	-103.665	259.634	-94.2085	301.816	311.22	313.157	176.427	26.0666	283.733	102.73
1510	454086	'Chardonnay' x V. cinerea B9	right	361.661	-16.956	-420.861	-672.598	191.668	-171.196	-312.687	-134.056	-424.2	-25.0088	-69.491	274.739	-54.0556	311.229	257.909	335.434	174.877	11.6679	295.179	86.745
1511	454086	'Chardonnay' x V. cinerea B9	right	335.385	-27.9155	-425.248	-676.624	135.966	-196.929	-176.195	-144.885	-476.351	-28.7203	-48.0919	280.215	-45.0585	347.7	253.479	370.893	171.718	-6.87435	274.396	83.1406
1512	454086	'Chardonnay' x V. cinerea B9	right	298.404	-26.4249	-390.586	-649.057	129.857	-163.433	-251.081	-147.067	-469.021	-124.241	-53.8437	309.496	-50.0269	373.672	354.574	360.973	152.664	12.7286	279.06	53.3522
1513	454087	'Chardonnay' x V. cinerea B9	right	338.924	-39.8947	-400.315	-609.023	132.054	-200.64	-127.942	-93.5657	-525.597	-83.8584	-103.739	256.338	-110.579	353.966	330.04	358.085	152.32	10.1071	314.834	48.4846
1514	454087	'Chardonnay' x V. cinerea B9	right	300.039	-36.2197	-342.252	-652.32	85.6955	-208.741	-131.909	-110.357	-529.588	-51.905	-4.78811	207.48	-96.2496	426.487	337.286	387.349	110.389	4.62489	271.378	33.6015
1515	454087	'Chardonnay' x V. cinerea B9	right	287.176	-28.0604	-406.583	-680.054	88.4814	-200.969	-113.517	-97.2867	-485.12	-71.5007	-34.9305	253.237	-94.1273	373.047	332.182	378.6	155.866	8.42102	270.573	64.565
1516	454087	'Chardonnay' x V. cinerea B9	right	345.32	-37.4059	-414.854	-640.5	173.035	-195.204	-126.124	-114.219	-496.314	-5.13414	-76.5227	225.173	-110.632	370.722	272.989	386.473	134.711	-17.6597	298.391	27.7552
1517	454087	'Chardonnay' x V. cinerea B9	right	318.812	-20.3056	-416.931	-643.622	134.301	-194.546	-49.3609	-129.348	-531.308	2.15368	-34.0573	197.165	-102.671	338.226	294.585	395.714	111.484	5.23397	275.145	49.3288
1518	454087	'Chardonnay' x V. cinerea B9	right	353.258	-6.20649	-464.69	-622.32	132.921	-190.193	-135.055	-138.084	-478.671	-48.3145	-75.2439	221.383	-104.143	328.993	277.115	380.06	179.628	10.1465	314.881	64.5346
1519	454088	'Chardonnay' x V. cinerea B9	right	305.98	-2.72282	-394.146	-706.52	149.078	-167.549	-282.181	-146.192	-452.425	-39.4288	-36.86	288.866	-15.2233	334.039	292.511	361.148	166.526	21.528	266.741	56.8323
1520	454088	'Chardonnay' x V. cinerea B9	right	315.919	-32.1859	-368.897	-662.454	140.953	-168.545	-242.779	-140.486	-501.85	-58.0829	-64.2664	295.039	-69.9116	364.356	332.023	341.269	174.395	6.29489	284.414	54.7952
1521	454088	'Chardonnay' x V. cinerea B9	right	276.786	-17.6438	-371.42	-738.833	142.727	-153.314	-296.031	-125.86	-405.676	-46.5339	-41.3284	310.484	-27.1088	361.639	333.216	339.909	138.97	8.0228	249.866	62.1302
1522	454088	'Chardonnay' x V. cinerea B9	right	337.237	-42.3294	-411.399	-637.586	175.557	-167.875	-294.02	-135.72	-412.089	-51.0562	-101.832	284.338	-93.5354	348.904	293.67	381.769	181.816	-4.98547	324.596	24.5409
1523	454088	'Chardonnay' x V. cinerea B9	right	287.12	-24.8975	-371.813	-696.052	157.785	-157.931	-295.232	-161.408	-445.139	-42.5944	-57.552	310.753	-19.048	351.581	327.269	362.136	151.598	-0.778326	265.012	59.191
1524	454088	'Chardonnay' x V. cinerea B9	right	295.94	-30.2417	-382.991	-677.995	137.278	-164.54	-194.075	-140.656	-493.888	-49.5444	-80.0283	292.177	-58.8428	349.208	356.78	366.746	150.813	6.55253	269.015	48.2942
1525	454090	'Chardonnay' x V. cinerea B9	right	306.339	-24.3155	-419.523	-704.808	171.716	-163.759	-160.232	-103.223	-490.497	-20.3603	-66.4475	279.32	-63.9565	320.399	285.453	346.544	159.284	17.4215	277.864	52.7812
1526	454090	'Chardonnay' x V. cinerea B9	right	257.776	-18.347	-392.429	-733.278	129.764	-161.152	-140.326	-113.743	-481.081	-32.5435	-46.8722	265.862	-38.0775	365.359	336.468	354.825	131.298	19.4949	243.48	53.5215
1527	454090	'Chardonnay' x V. cinerea B9	right	292.458	1.39645	-438.011	-641.441	157.382	-154.591	-102.343	-150.574	-516.165	-75.9889	-55.8602	258.183	-89.3536	370.546	327.596	345.598	153.483	7.50688	270.815	39.3642
1528	454090	'Chardonnay' x V. cinerea B9	right	280.884	-22.6874	-386.39	-721.49	119.751	-189.466	-81.6261	-111.295	-507.682	3.40062	-48.2517	289.342	-46.3541	341.172	290.907	353.287	137.298	17.2968	241.464	40.4401
1529	454090	'Chardonnay' x V. cinerea B9	right	268.752	-20.4515	-338.442	-651.777	122.126	-197.408	-156.884	-163.312	-547.55	-45.0437	-62.8372	311.677	-54.0285	374.358	361.848	345.006	153.184	4.91097	253.832	42.0403
1530	454090	'Chardonnay' x V. cinerea B9	right	249.645	-19.2816	-368.146	-740.963	119.692	-162.264	-125.779	-105.254	-506.836	-37.7874	-39.9303	302.072	-17.0943	348.53	333.925	325.166	121.005	26.547	233.518	63.235
1531	454092	'Chardonnay' x V. cinerea B9	right	346.561	-17.4524	-467.685	-680.934	127.128	-195.941	-191.744	-119.549	-395.439	-76.0661	-75.6781	290.948	-46.4348	335.338	267.721	379.814	149.63	2.47811	285.941	81.3637
1532	454092	'Chardonnay' x V. cinerea B9	right	305.438	-27.312	-428.749	-688.778	133.977	-195.711	-64.5454	-109.19	-486.872	-13.4918	-58.018	244.483	-79.3217	370.223	271.93	359.898	138.643	4.26475	267.518	55.6146
1533	454092	'Chardonnay' x V. cinerea B9	right	297.515	-24.8921	-453.94	-697.465	131.656	-188.352	-91.1742	-108.867	-447.714	-32.4985	-74.6183	247.853	-63.0626	346.334	291.716	386.079	144.195	3.01364	265.427	68.7951
1534	454092	'Chardonnay' x V. cinerea B9	right	290.653	-61.4524	-357.29	-681.376	129.495	-205.3	-159.296	-109.667	-490.336	-25.7584	-103.13	313.175	-64.2978	375.307	321.188	365.982	158.934	-4.54805	274.081	33.6381
1535	454092	'Chardonnay' x V. cinerea B9	right	300.891	-0.828358	-397.137	-737.654	137.643	-188.923	-211.252	-126.403	-432.913	-1.96931	-66.6961	284.893	-40.4191	346.387	316.658	344.05	139.751	6.9334	253.475	73.5133
1536	454092	'Chardonnay' x V. cinerea B9	right	295.404	-39.0197	-367.193	-724.768	143.617	-183.349	-139.936	-104.228	-481.993	42.0182	-81.4205	259.418	-71.8619	348.44	314.745	367.772	126.386	-3.83552	262.252	37.5522
1537	454093	'Chardonnay' x V. cinerea B9	right	267.475	-30.7366	-351.212	-679.983	130.909	-161.53	-288.642	-167.233	-448.98	-83.0817	-51.441	285.92	-3.88376	406.648	366.053	371.135	135.547	-3.24852	244.174	62.1094
1538	454093	'Chardonnay' x V. cinerea B9	right	250.891	-34.6033	-312.843	-738.203	162.196	-151.561	-347.953	-133.824	-418.067	-27.9669	-22.8845	300.584	16.599	382.839	332.181	335.589	133.149	-4.27421	206.732	71.4201
1539	454093	'Chardonnay' x V. cinerea B9	right	357.623	-11.0976	-438.537	-686.358	175.395	-156.077	-291.873	-141.99	-395.621	5.77761	-84.8949	239.922	-51.3216	299.676	263.296	379.176	171.469	6.62316	294.464	64.3486
1540	454093	'Chardonnay' x V. cinerea B9	right	302.689	-45.9625	-338.414	-660.993	168.148	-153.091	-277.878	-153.006	-509.897	-36.2822	-69.19	296.64	-43.1562	361.379	336.779	359.074	160.398	-7.15879	270.521	39.4007
1541	454093	'Chardonnay' x V. cinerea B9	right	275.146	-45.8482	-373.722	-660.628	141.04	-195.735	-102.418	-136.512	-515.241	-46.1612	-75.8444	300.158	-38.5864	378.924	327.085	399.682	115.43	-3.00844	247.11	9.12962
1542	454093	'Chardonnay' x V. cinerea B9	right	306.752	-39.8687	-396.972	-682.443	185.315	-147.069	-231.02	-138.799	-483.002	-41.0288	-77.9685	301.203	-33.3943	347.249	294.192	360.422	163.106	4.69092	272.992	35.6434
1543	454094	'Chardonnay' x V. cinerea B9	right	305.633	-8.59164	-406.101	-727.595	155.92	-163.415	-278.429	-131.427	-422.238	-38.0752	-51.9682	295.064	-12.0451	347.304	278.551	325.02	167.196	19.2312	263.48	82.4857
1544	454094	'Chardonnay' x V. cinerea B9	right	316.247	-78.5231	-304.059	-630.98	173.467	-195.648	-306.202	-174.128	-471.41	9.04871	-94.8751	324.17	-87.0992	368.199	334.787	365.166	154.732	-11.6515	284.411	24.3455
1545	454094	'Chardonnay' x V. cinerea B9	right	332.168	-21.7689	-334.576	-640.538	140.352	-211.734	-330.88	-162.851	-457.215	-23.6001	-78.1953	314.832	-52.3737	357.252	303.587	368.312	186.464	-8.856	290.67	28.9515
1546	454094	'Chardonnay' x V. cinerea B9	right	335.649	-8.90641	-429.602	-652.49	150.789	-195.383	-295.359	-169.256	-386.155	-47.7993	-86.2277	293.319	-58.9475	325.618	301.733	389.71	161.487	5.74927	306.633	59.4381
1547	454094	'Chardonnay' x V. cinerea B9	right	287.319	-54.764	-346.663	-673.282	141.649	-191.619	-249.329	-150.606	-473.798	-56.5372	-59.0621	325.555	-34.0585	396.169	325.996	367.739	147.179	-16.1365	260.768	53.4816
1548	454094	'Chardonnay' x V. cinerea B9	right	303.779	7.337	-424.944	-729.335	152.755	-170.067	-279.675	-135.778	-401.398	-50.7208	-18.6396	298.041	3.59291	332.678	265.524	348.005	150.544	2.4226	248.462	97.4181
1549	454095	'Chardonnay' x V. cinerea B9	right	267.302	-49.0955	-251.451	-690.06	155.87	-169.801	-328.579	-159.229	-491.053	1.76626	-56.4002	335.023	-10.9069	384.579	348.045	314.369	123.847	-6.07249	243.326	38.5218
1550	454095	'Chardonnay' x V. cinerea B9	right	308.902	-14.4397	-397.528	-656.661	166.014	-165.778	-323.021	-162.326	-418.709	-65.3854	-71.331	288.75	-46.7722	358.519	317.781	375.821	171.671	-3.69387	292.992	45.1935
1551	454095	'Chardonnay' x V. cinerea B9	right	309.595	-42.3238	-342.36	-642.337	179.597	-177.063	-319.641	-149.305	-453.991	-23.0551	-99.5189	303.59	-74.0747	368.749	320.061	367.973	183.681	-15.6069	296.652	9.37872
1552	454095	'Chardonnay' x V. cinerea B9	right	303.29	-40.9402	-312.154	-614.246	162.637	-182.091	-341.6	-180.342	-475.635	-58.1482	-73.6716	323.671	-40.4086	383.139	332.59	375.325	159.309	-8.45144	285.644	2.08397
1553	454095	'Chardonnay' x V. cinerea B9	right	271.776	-54.8334	-285.373	-660.69	167.556	-169.017	-310.876	-171.124	-477.465	-12.8307	-57.0854	332.98	-39.9495	405.17	330.447	365.32	147.588	-31.9359	253.382	-3.03877
1554	454095	'Chardonnay' x V. cinerea B9	right	280.228	-40.6779	-316.364	-661.604	150.618	-190.637	-345.417	-185.559	-423.233	-43.6669	-66.7772	322.017	-10.3361	379.168	367.161	382.825	124.104	-16.9341	240.017	55.0692
1555	454096	'Chardonnay' x V. cinerea B9	right	301.038	-16.6214	-338.912	-717.313	149.257	-170.054	-291.739	-135.219	-481.612	-1.74424	-38.3015	298.145	-13.9778	341.908	291.236	343.559	150.524	10.4503	272.488	46.8891
1556	454096	'Chardonnay' x V. cinerea B9	right	289.885	-27.3461	-380.826	-665.408	148.786	-185.403	-239.657	-166.178	-449.517	-77.4623	-57.4668	328.658	-57.1908	389.693	348.91	365.758	142.686	1.73311	254.391	35.9557
1557	454096	'Chardonnay' x V. cinerea B9	right	289.444	-17.2634	-371.632	-715.746	142.434	-163.055	-241.819	-125.433	-484.038	-43.8725	-32.1513	289.757	-28.3617	358.526	318.319	344.777	150.962	0.950348	256.842	71.3609
1558	454096	'Chardonnay' x V. cinerea B9	right	298.049	-6.21599	-346.822	-716.869	120.129	-170.968	-261.091	-151.202	-482.455	-19.6669	-40.1531	301.913	-18.7089	343.739	333.331	335.845	134.39	11.2212	263.332	72.2043
1559	454096	'Chardonnay' x V. cinerea B9	right	314.72	-18.2618	-354.376	-681.488	167.572	-171.034	-275.309	-147.168	-488.051	-7.41143	-65.3351	278.927	-55.5626	352.69	324.215	356.578	154.969	0.87432	277.157	36.2932
1560	454096	'Chardonnay' x V. cinerea B9	right	319.61	1.63866	-387.793	-723.453	147.081	-167.762	-295.339	-122.811	-429.707	-11.3794	-55.1305	273.575	-35.4269	322.901	301.462	346.46	151.35	7.16851	283.894	73.6629
1561	454097	'Chardonnay' x V. cinerea B9	right	309.93	-12.0667	-416.846	-734.157	154.429	-174.384	-275.46	-120.631	-400.683	-14.3707	-47.8075	283.052	-29.622	313.705	279.973	358.553	158.741	12.5064	267.345	87.7928
1562	454097	'Chardonnay' x V. cinerea B9	right	278.972	-13.0519	-377.926	-737.418	153.44	-155.168	-259.197	-128.689	-452.869	-16.0235	-31.7366	291.181	-18.8821	341.414	304.014	358.351	158.381	2.96603	245.803	56.4373
1563	454097	'Chardonnay' x V. cinerea B9	right	285.967	5.71615	-397.951	-731.218	137.605	-162.372	-305.159	-158.044	-404.325	-39.17	-19.3001	292.917	-2.25969	344.211	299.739	335.785	164.75	8.80276	240.935	103.373
1564	454097	'Chardonnay' x V. cinerea B9	right	287.518	-30.3642	-354.493	-734.352	168.592	-163.507	-260.153	-125.43	-459.579	12.6396	-49.596	303.769	-39.3231	348.113	301.435	341.785	150.751	0.688296	254.849	46.6591
1565	454097	'Chardonnay' x V. cinerea B9	right	266.965	-26.4038	-370.237	-731.226	132.984	-168.249	-245.633	-116.43	-446.537	-69.9572	-36.2124	326.538	-9.43098	373.274	318.16	336.932	145.971	9.15105	243.97	66.3708
1566	454097	'Chardonnay' x V. cinerea B9	right	311.094	-29.193	-370.359	-665.77	168.402	-174.677	-296.34	-159.569	-471.722	-55.3616	-53.9629	309	-35.2493	356.766	315.152	353.347	157.535	2.28344	275.451	63.1746
1567	454098	'Chardonnay' x V. cinerea B9	right	299.952	-25.2395	-340.905	-667.043	162.186	-154.146	-386.533	-161.144	-417.016	-62.9972	-78.861	314.239	-8.38985	343.767	345.025	345.402	158.284	7.68278	266.258	59.4778
1568	454098	'Chardonnay' x V. cinerea B9	right	342.571	-2.90199	-465.868	-631.575	189.727	-164.063	-281.062	-155.175	-389.572	-77.6484	-106.593	274.488	-58.3172	334.81	285.61	376.517	192.134	-7.94923	291.371	53.4988
1569	454098	'Chardonnay' x V. cinerea B9	right	287.029	-20.5522	-368.305	-695.307	133.886	-159.064	-306.214	-163.933	-440.237	-69.3662	-37.6224	313.372	-10.9135	367.836	327.568	351.917	158.423	8.60292	256.385	66.4948
1570	454098	'Chardonnay' x V. cinerea B9	right	318.884	-41.2193	-370.834	-688.479	179.783	-139.386	-319.024	-116.02	-447.991	-29.5494	-67.8415	285.374	-47.7448	328.731	296.898	374.332	168.448	4.30999	289.422	21.906
1571	454098	'Chardonnay' x V. cinerea B9	right	322.869	-27.8668	-384.018	-617.703	140.927	-178.278	-324.44	-160.213	-453.749	-101.268	-90.4538	287.117	-35.214	344.014	336.035	373.917	182.701	11.6351	305.343	68.6447
1572	454098	'Chardonnay' x V. cinerea B9	right	340.996	-7.68273	-442.408	-645.389	195.59	-170.452	-292.886	-157.528	-407.891	-30.3255	-104.294	258.418	-74.4061	313.661	290.227	366.532	179.93	22.2471	315.141	50.52
1573	454099	'Chardonnay' x V. cinerea B9	right	337.448	-22.4462	-355.311	-672.131	192.438	-170.005	-307.451	-133.982	-460.678	38.7736	-103.691	283.406	-66.2557	309.554	281.117	355.095	173.782	-10.7967	308.603	22.5315
1574	454099	'Chardonnay' x V. cinerea B9	right	331.622	-9.00784	-366.863	-667.042	157.988	-188.382	-346.848	-157.604	-414.107	-30.9275	-79.7028	300.027	-36.8387	359.057	305.298	357.695	176.642	-21.0812	272.808	57.2645
1575	454099	'Chardonnay' x V. cinerea B9	right	326.582	-30.6662	-389.28	-659.176	168.46	-174.667	-318.431	-148.932	-413.73	-51.9556	-105.498	308.902	-44.7156	367.866	296.427	344.241	190.045	-15.5375	290.14	59.9251
1576	454099	'Chardonnay' x V. cinerea B9	right	328.306	-31.7666	-361.497	-644.705	176.832	-166.871	-334.955	-174.686	-447.963	-33.0472	-80.5104	307.729	-35.1725	359.029	294.151	367.315	172.25	-16.5755	288.559	33.5793
1577	454099	'Chardonnay' x V. cinerea B9	right	325.789	-6.36463	-376.585	-672.786	153.929	-200.697	-294.233	-149.002	-471.809	-20.1325	-56.5281	293.845	-24.9874	330.901	275.16	359.465	190.47	-13.1264	278.794	77.8984
1578	454099	'Chardonnay' x V. cinerea B9	right	359.893	19.4968	-409.707	-677.886	183.332	-140.327	-322.094	-159.559	-445.65	-21.4314	-77.7725	275.388	-13.9483	319.5	253.018	286.448	194.732	6.97779	278.197	91.3927
1579	454100	'Chardonnay' x V. cinerea B9	right	356.418	-9.1756	-440.705	-656.83	157.477	-171.833	-302.032	-173.035	-393.7	-35.1512	-75.8777	260.821	-48.9007	319.855	275.212	381.481	161.265	16.7938	310.844	67.0733
1580	454100	'Chardonnay' x V. cinerea B9	right	301.618	-37.0949	-359.384	-718.483	120.984	-218.612	-207.273	-108.175	-456.167	-23.2753	-52.1341	323.112	-0.411982	364.214	270.509	389.641	128.37	-10.2202	253.889	38.8953
1581	454100	'Chardonnay' x V. cinerea B9	right	343.899	-6.97742	-412.296	-635.822	165.203	-168.872	-310.695	-173.95	-431.942	-50.2865	-101.31	279.76	-44.086	312.707	321.139	375.078	164.984	-2.41929	305.104	70.7838
1582	454100	'Chardonnay' x V. cinerea B9	right	322.921	3.08392	-437.24	-732.298	156.348	-180.856	-187.606	-123.153	-437.416	3.00794	-54.6091	270.561	-26.2353	323.64	249.184	341.307	150.869	13.1616	263.786	81.5453
1583	454100	'Chardonnay' x V. cinerea B9	right	293.336	-25.1726	-346.434	-700.209	117.734	-197.056	-166.324	-147.78	-508.501	3.64488	-86.3686	302.208	-22.2139	356.909	330.207	357.398	136.549	4.77964	252.017	45.2781
1584	454100	'Chardonnay' x V. cinerea B9	right	311.539	-12.2596	-379.032	-695.476	120.435	-195.976	-212.036	-152.711	-463.071	-29.5467	-72.1492	300.409	-32.5239	350.951	337.936	370.177	117.062	1.20837	271.841	63.224
1585	454101	'Chardonnay' x V. cinerea B9	right	354.518	3.42564	-457.521	-674.511	170.593	-154.052	-304.61	-140.747	-368.643	-38.9638	-96.6021	261.178	-50.6566	310.541	265.349	355.628	179.767	11.1182	307.808	66.3828
1586	454101	'Chardonnay' x V. cinerea B9	right	332.41	-46.8882	-373.766	-663.992	173.878	-177.067	-264.774	-133.188	-469.976	-3.82467	-90.6976	275.496	-79.4202	346.662	303.964	373.765	178.139	-12.5828	290.242	41.6197
1587	454101	'Chardonnay' x V. cinerea B9	right	333.735	-35.3355	-352.151	-668.554	171.923	-170.598	-333.892	-127.372	-446.971	-28.1658	-85.1955	294.564	-47.806	343.46	309.313	365.819	157.828	-12.2767	293.217	38.4595
1588	454101	'Chardonnay' x V. cinerea B9	right	366.196	-29.0025	-461.518	-619.831	181.983	-172.29	-229.58	-145.283	-443.972	-35.9025	-84.909	224.777	-83.4378	329.188	241	390.168	193.405	-0.218836	320.834	58.3954
1589	454101	'Chardonnay' x V. cinerea B9	right	346.816	-4.03377	-453.122	-678.414	164.018	-169.102	-265.429	-123.892	-394.749	-36.045	-89.8376	253.143	-63.2065	323.798	267.9	373.329	181.742	4.56564	305.868	56.6508
1590	454101	'Chardonnay' x V. cinerea B9	right	336.04	-13.5458	-443.298	-686.402	189.099	-159.085	-211.128	-121.763	-466.645	27.1656	-49.6127	221.538	-73.8339	295.749	226.626	359.888	203.82	-6.95052	288.933	83.4052
1591	454102	'Chardonnay' x V. cinerea B9	right	327.331	-35.8892	-404.902	-652.051	144.164	-177.267	-162.234	-125.191	-481.014	-46.8821	-107.063	292.672	-99.5677	363.652	323.956	357.157	169.076	-10.9079	290.254	34.7082
1592	454102	'Chardonnay' x V. cinerea B9	right	331.243	-1.2398	-415.065	-609.669	147.101	-179.423	-279.905	-154.905	-460.121	-132.362	-61.8975	271.419	-58.7112	363.847	345.534	373.862	165.8	7.72955	286.022	60.7409
1593	454102	'Chardonnay' x V. cinerea B9	right	313.761	-9.61157	-408.526	-677.696	155.232	-155.744	-271.605	-142.279	-463.938	-67.2206	-49.4973	282.443	-43.634	343.307	306.312	357.36	183.796	7.61379	278.1	61.8276
1594	454102	'Chardonnay' x V. cinerea B9	right	314.113	-33.8974	-404.132	-675.404	126.376	-177.331	-184.28	-122.175	-471.964	-72.7201	-58.6322	283.54	-75.1143	368.295	331.652	377.64	144.961	7.89831	277.02	44.155
1595	454102	'Chardonnay' x V. cinerea B9	right	332.614	-13.9458	-413.851	-662.821	138.384	-168.185	-247.401	-151.726	-472.365	-48.8283	-48.8776	264.7	-53.195	330.913	295.15	391.021	175.893	8.57354	293.649	50.2996
1596	454102	'Chardonnay' x V. cinerea B9	right	335.619	-19.4593	-420.116	-639.785	164.169	-158.364	-242.99	-129.745	-468.509	-77.6696	-85.8041	283.601	-88.6199	337.044	313.722	355.309	170.843	4.52235	321.685	44.5464
1597	454103	'Chardonnay' x V. cinerea B9	right	317.846	-26.7401	-363.192	-593.224	159.687	-209.592	-315.279	-184.936	-441.719	-75.2013	-95.5729	299.993	-61.3424	371.824	354.892	405.729	161.02	-17.2902	283.66	29.4368
1598	454103	'Chardonnay' x V. cinerea B9	right	350.969	13.3491	-415.166	-679.939	156.253	-154.805	-337.169	-161.265	-421.524	-34.2512	-57.723	263.903	-15.8941	302.82	276.392	336.747	171.789	14.4213	292.074	99.0189
1599	454103	'Chardonnay' x V. cinerea B9	right	299.475	-13.1195	-347.037	-648.982	130.104	-172.367	-318.242	-185.704	-481.246	-76.7608	-37.7687	281.769	-2.38297	366.174	350.338	375.536	137.146	2.31098	269.613	71.1438
1600	454103	'Chardonnay' x V. cinerea B9	right	288.96	-8.77895	-346.348	-637.869	98.8311	-191.967	-288.344	-212.715	-465.312	-80.6915	-45.1385	297.615	-35.0613	374.719	392.011	361.241	125.253	19.5244	275.149	78.9229
1601	454103	'Chardonnay' x V. cinerea B9	right	339.866	4.58857	-385.084	-667.556	146.823	-186.019	-323.044	-152.988	-432.737	-55.288	-72.5338	297.266	-43.8204	338.37	323.791	339.058	160.778	6.57444	285.961	75.994
1602	454103	'Chardonnay' x V. cinerea B9	right	317.269	-26.7849	-387.943	-679.253	150.41	-190.103	-296.47	-151.518	-430.694	-38.1881	-63.8615	287.162	-48.9112	347.603	313.577	373.318	152.984	12.7614	293.64	65.0028
1603	454104	'Chardonnay' x V. cinerea B9	right	308.354	3.5621	-428.373	-690.314	177.662	-131.296	-283.184	-169.508	-434.904	-59.6044	-45.9538	292.901	-30.1732	334.316	305.388	335.519	174.618	8.64818	256.565	75.7769
1604	454104	'Chardonnay' x V. cinerea B9	right	306.872	47.412	-452.363	-721.154	162.989	-149.69	-266.168	-149.45	-399.742	-72.8627	-37.7812	287.683	4.72975	332.526	285.338	309.895	155.97	27.5124	240.155	88.1284
1605	454104	'Chardonnay' x V. cinerea B9	right	334.205	-0.158855	-422.994	-653	183.927	-145.482	-290.583	-132.958	-472.767	-67.358	-83.1837	259.82	-41.2578	313.005	296.132	336.983	200.884	12.7242	295.637	76.4255
1606	454104	'Chardonnay' x V. cinerea B9	right	291.405	-1.60137	-445.379	-707.689	169.78	-164.831	-296.647	-150.865	-363.885	-51.9705	-47.1054	281.304	-29.7619	333.16	293.75	372.618	163.627	7.38402	264.217	82.4923
1607	454104	'Chardonnay' x V. cinerea B9	right	304.642	-27.1289	-368.588	-680.218	164.34	-165.662	-339.958	-134.435	-443.242	-50.5547	-68.2837	290.404	-10.906	341.09	297.983	365.871	182.415	1.10208	281.597	59.5309
1608	454104	'Chardonnay' x V. cinerea B9	right	273.742	-51.1624	-310.95	-662.59	143.963	-158.215	-330.904	-193.997	-464.237	-59.4369	-45.623	348.029	-11.4234	377.442	350.693	343.801	142.489	1.56591	252.251	54.5642
1609	454105	'Chardonnay' x V. cinerea B9	right	350.954	4.53012	-498.993	-663.607	172.925	-165.695	-267.741	-143.821	-347.306	-45.3741	-81.3962	243.025	-69.4253	294.646	259.532	376.114	187.178	8.91122	294.273	91.2709
1610	454105	'Chardonnay' x V. cinerea B9	right	304.252	-14.7578	-383.653	-633.559	163.979	-168.883	-307.62	-170.414	-449.263	-77.7404	-86.2252	292.935	-52.8354	351.363	360.188	379.527	172.7	-1.74353	278.476	43.2719
1611	454105	'Chardonnay' x V. cinerea B9	right	267.987	-45.8997	-246.624	-669.478	128.84	-192.054	-309.22	-171.706	-499.377	-9.78469	-47.0585	333.064	-11.6301	405.897	348.013	343.584	123.321	-19.5579	245.748	25.9367
1612	454105	'Chardonnay' x V. cinerea B9	right	309.9	-39.4035	-366.64	-674.638	154.2	-191.674	-267.734	-152.511	-477.68	-29.8222	-49.7949	283.117	-34.9665	356.655	313.026	387.246	147.138	-5.30819	272.551	66.3384
1613	454105	'Chardonnay' x V. cinerea B9	right	315.807	-25.2414	-406.716	-660.893	188.317	-164.637	-306.554	-147.624	-415.136	-40.4252	-101.326	279.67	-41.2335	336.577	307.87	394.176	165.41	-7.83638	293.562	36.2342
1614	454105	'Chardonnay' x V. cinerea B9	right	336.374	-7.77323	-445.854	-686.422	186.334	-167.943	-265.498	-147.48	-409.723	-18.4602	-62.0991	283.903	-56.8788	317.532	255.217	361.148	179.095	-1.24172	283.033	66.7378
1615	454107	'Chardonnay' x V. cinerea B9	right	334.947	5.16958	-446.89	-690.471	184.029	-153.055	-278.231	-135.052	-408.181	-23.1991	-66.801	263.23	-62.3583	303.857	279.793	362.37	178.498	0.00881309	285.194	67.14
1616	454107	'Chardonnay' x V. cinerea B9	right	308.294	-34.6807	-366.536	-662.989	173.612	-157.97	-275.438	-144.855	-481.594	-43.8174	-67.805	289.613	-70.5705	360.069	337.308	363.503	163.495	0.0876886	279.235	31.0398
1617	454107	'Chardonnay' x V. cinerea B9	right	316.492	-16.8706	-414.649	-715.603	148.264	-154.881	-262.196	-128.963	-438.195	-23.3914	-41.232	266.751	-43.9781	322.256	291.672	363.687	176.952	0.622345	266.87	86.393
1618	454107	'Chardonnay' x V. cinerea B9	right	320.062	-15.9097	-395.907	-681.089	179.48	-150.119	-288.198	-121.662	-464.793	-52.5746	-43.6469	257.369	-49.5748	352.987	299.611	371.132	163.08	-3.92272	279.887	43.7901
1619	454107	'Chardonnay' x V. cinerea B9	right	346.676	-21.9759	-406.052	-686.556	159.256	-170.101	-243.543	-100.867	-481.632	-7.9546	-70.1026	230	-40.7401	300.399	266.614	379.474	159.587	5.51033	309.937	72.0714
1620	454107	'Chardonnay' x V. cinerea B9	right	333.928	-39.1146	-417.185	-650.643	163.843	-182.098	-212.194	-158.374	-445.789	-26.9984	-101.251	306.403	-83.9459	353.822	292.141	373.225	182.149	-15.6504	288.304	39.4288
1621	454108	'Chardonnay' x V. cinerea B9	right	306.723	-49.7203	-335.38	-670.659	146.919	-165.16	-283.484	-163.526	-444.321	-25.7296	-105.565	336.16	-48.0379	384.61	335.67	354.033	143.743	-19.2006	283.734	19.191
1622	454108	'Chardonnay' x V. cinerea B9	right	307.466	-60.0858	-310.695	-656.421	166.078	-180.522	-326.958	-145.558	-452.526	-23.8713	-105.605	310.998	-62.6331	367.401	370.988	357.226	149.546	-9.63913	264.338	40.4717
1623	454108	'Chardonnay' x V. cinerea B9	right	291.825	-5.51384	-403.058	-751.969	141.937	-175.39	-208.805	-110.64	-445.832	-16.3112	-19.148	296.062	-5.95807	341.828	257.048	345.427	155.026	0.380834	236.965	76.1256
1624	454108	'Chardonnay' x V. cinerea B9	right	323.793	1.18817	-401.174	-678.348	162.158	-174.05	-322.084	-164.135	-414.155	-33.5711	-67.0039	292.676	-44.2405	335.811	299.07	352.575	173.089	7.08832	290.546	60.7649
1625	454108	'Chardonnay' x V. cinerea B9	right	309.025	-32.2107	-359.534	-700.433	171.831	-152.307	-316.518	-128.873	-465.983	-9.85821	-32.0791	272.351	-43.5889	336.563	293.11	365.647	173.917	-5.61726	269.819	54.7367
1626	454108	'Chardonnay' x V. cinerea B9	right	318.324	-16.0696	-437.583	-701.273	164.179	-157.636	-241.86	-140.711	-435.616	-26.7583	-60.6965	274.178	-32.6189	326.928	261.211	360.851	185.368	3.09675	279.293	77.3946
1627	454109	'Chardonnay' x V. cinerea B9	right	316.772	1.03754	-468.151	-660.996	134.906	-177.318	-197.149	-143.095	-432.739	-92.4235	-60.0999	263.309	-57.2149	330.606	314.309	388.96	178.213	11.7507	271.154	78.17
1628	454109	'Chardonnay' x V. cinerea B9	right	282.153	27.3575	-435.805	-725.027	118.15	-174.175	-161.392	-112.593	-477.705	-51.6789	28.1496	193.456	-2.60949	354.058	266.092	363.409	147.18	17.7932	235.786	107.4
1629	454109	'Chardonnay' x V. cinerea B9	right	286.057	-17.1622	-387.936	-716.873	98.7959	-187.806	-131.667	-130.95	-498.056	-24.956	-20.2246	240.743	-24.9933	366.635	316.024	373.904	115.493	15.2322	246.506	81.2335
1630	454109	'Chardonnay' x V. cinerea B9	right	320.148	-32.364	-421.688	-673.415	169.932	-158.954	-267.041	-150.205	-433.476	-69.6775	-50.6055	294.315	-55.0623	348.899	308.17	375.374	159.107	5.83569	270.515	60.1915
1631	454109	'Chardonnay' x V. cinerea B9	right	326.599	-14.947	-447.195	-674.873	170.385	-170.982	-289.545	-137.89	-381.19	-67.2597	-63.5101	292.451	-51.9704	330.752	282.684	382.974	171.238	-10.9511	282.505	70.7259
1632	454109	'Chardonnay' x V. cinerea B9	right	314.113	6.0053	-449.157	-713.06	124.904	-163.526	-155.157	-123.703	-457.879	-27.8775	-41.8574	223.469	-47.8492	318.802	301.682	373.987	139.912	18.7024	271.289	87.2004
1633	454110	'Chardonnay' x V. cinerea B9	right	334.588	-28.7284	-438.799	-691.605	192.23	-154.971	-275.422	-130.175	-431.157	-9.39306	-47.3971	257.235	-41.6107	301.312	234.063	368.61	204.246	4.8634	269.257	82.8515
1634	454110	'Chardonnay' x V. cinerea B9	right	334.228	-30.2561	-412.752	-650.757	184.386	-161.621	-281.962	-149.54	-451.023	-46.3165	-71.915	273.755	-65.3551	338.685	296.52	382.353	176.576	-1.74079	291.296	45.4373
1635	454110	'Chardonnay' x V. cinerea B9	right	357.272	-59.0636	-405.503	-610.032	140.466	-195.125	-140.981	-126.714	-514.475	-72.5813	-78.2498	280.185	-78.4431	377.343	281.398	391.576	176.289	-25.9204	262.226	40.3325
1636	454110	'Chardonnay' x V. cinerea B9	right	298.254	-28.245	-401.67	-661.998	145.128	-165.811	-176.772	-123.447	-517.545	-76.2775	0.198357	219.533	-74.2622	378.857	325.33	389.065	138.751	8.33748	262.587	59.9857
1637	454110	'Chardonnay' x V. cinerea B9	right	329.66	-6.5052	-477.24	-659.859	162.362	-169.045	-142.523	-134.961	-457.62	-44.7107	-83.9101	245.806	-59.4518	329.448	266.012	378.969	189.994	-7.77648	272.717	68.6353
1638	454110	'Chardonnay' x V. cinerea B9	right	290.369	-46.3872	-330.581	-649.38	139.276	-164.209	-306.525	-168.418	-488.539	-59.9712	-60.0098	294.023	-36.4783	365.053	366.844	377.051	157.787	-6.40545	267.857	58.6442
1639	455001	'Chardonnay' x V. cinerea B9	right	312.359	-27.002	-357.453	-679.153	170.065	-153.451	-294.401	-149.165	-475.813	-31.5269	-65.5644	292.118	-50.9909	350.302	338.766	355.257	157.186	3.46571	265.845	39.1552
1640	455001	'Chardonnay' x V. cinerea B9	right	313.495	-21.4123	-437.199	-688.949	188.233	-154.465	-280.685	-145.862	-415.272	-31.7719	-66.0377	265.173	-45.663	330.671	277.889	365.929	184.163	6.58766	281.077	74.0986
1641	455001	'Chardonnay' x V. cinerea B9	right	288.969	-49.0435	-351.632	-688.441	161.488	-150.595	-285.222	-128.473	-467.467	-31.2166	-82.6833	279.618	-48.2574	355.624	341.492	373.438	157.672	14.7933	285.64	24.2955
1642	455001	'Chardonnay' x V. cinerea B9	right	324.047	-28.3286	-381.73	-661.12	189.2	-156.647	-286.326	-134.057	-456.479	-20.0645	-105.319	288.819	-79.1428	337.197	308.205	352.255	171.928	4.73824	315.618	17.2073
1643	455001	'Chardonnay' x V. cinerea B9	right	313.195	-27.0073	-423.089	-681.624	181.646	-138.472	-275.151	-157.114	-434.414	-37.4213	-58.8937	269.753	-47.5647	349.694	288.158	373.889	185.176	-5.81034	270.938	54.1139
1644	455001	'Chardonnay' x V. cinerea B9	right	280.193	-42.329	-281.389	-637.968	132.845	-185.739	-310.154	-170.788	-491.286	-41.9777	-65.4277	310.634	-66.5999	402.888	386.121	352.216	158.676	-9.05068	257.022	22.1147
1645	455002	'Chardonnay' x V. cinerea B9	right	310.694	-25.2313	-368.593	-630.986	160.733	-167.133	-282.116	-184.716	-485.358	-63.2752	-82.5581	303.242	-47.6789	364.823	337.706	360.729	164.642	10.497	292.529	32.0515
1646	455002	'Chardonnay' x V. cinerea B9	right	333.925	16.204	-422.16	-712.49	159.413	-164.322	-296.146	-122.717	-427.105	-11.4479	-60.5822	246.64	-25.5004	288.72	269.634	340.152	172.767	35.7431	295.754	83.5175
1647	455002	'Chardonnay' x V. cinerea B9	right	332.486	-16.8951	-399.585	-677.493	176.797	-160.288	-313.584	-148.918	-419.829	-35.4501	-91.7861	281.933	-50.0891	335.286	314.122	345.132	148.658	16.7739	302.81	59.9196
1648	455002	'Chardonnay' x V. cinerea B9	right	301.81	-33.7503	-397.851	-670.077	136.224	-172.935	-196.028	-122.322	-499.719	-86.718	-54.9103	285.615	-47.2312	371.011	312.883	359.112	160.372	13.1513	284.451	56.9126
1649	455002	'Chardonnay' x V. cinerea B9	right	325.138	3.49619	-424.218	-676.942	171.431	-158.531	-309.446	-155.235	-412.663	-35.8462	-76.4673	258.496	-46.8028	314.71	314.395	372.801	173.199	13.3227	285.434	63.7294
1650	455002	'Chardonnay' x V. cinerea B9	right	293.728	-20.1906	-412.923	-676.532	136.44	-178.797	-196.194	-171.443	-472.945	-43.5987	-53.9535	295.47	-48.4725	361.226	301.203	366.277	172.152	5.22317	280.964	62.3661
1651	455003	'Chardonnay' x V. cinerea B9	right	355.469	-32.7771	-462.95	-616.347	185.766	-172.218	-259.764	-172.361	-431.844	-73.5123	-65.3208	279.212	-59.3551	324.526	249.3	383.048	185.477	9.26013	303.223	71.1708
1652	455003	'Chardonnay' x V. cinerea B9	right	305.365	-28.0716	-347.455	-692.973	165.518	-151.83	-305.315	-139.773	-483.782	-41.5542	-54.7112	296.259	-20.8167	365.241	311.966	319.655	152.651	5.12869	276.58	67.9183
1653	455003	'Chardonnay' x V. cinerea B9	right	302.173	-12.0668	-369.369	-710.974	149.116	-165.628	-307.993	-126.594	-430.255	-33.515	-43.6232	281.234	-51.8773	352.91	330.837	361.355	152.17	2.99846	268.82	50.2784
1654	455003	'Chardonnay' x V. cinerea B9	right	380.543	-17.5761	-463.123	-633.726	220.651	-150.947	-285.021	-121.479	-422.744	-13.8616	-75.0764	208.448	-97.7911	264.38	248.608	370.292	171.035	20.22	322.918	74.2487
1655	455003	'Chardonnay' x V. cinerea B9	right	284.83	-47.5783	-361.938	-684.927	151.362	-185.251	-293.482	-155.847	-441.018	-53.1414	-61.1858	308.861	-17.5033	379.367	323.498	369.806	152.599	-3.57773	262.838	72.2878
1656	455003	'Chardonnay' x V. cinerea B9	right	339.462	-26.0026	-420.409	-666.428	194.011	-168.134	-302.068	-135.067	-402.664	-35.7737	-92.4111	283.722	-68.6329	315.861	307.563	377.116	149.643	-5.3538	295.507	60.0607
1657	455004	'Chardonnay' x V. cinerea B9	right	350.709	-9.07672	-447.544	-628.582	169.471	-168.247	-319.509	-130.399	-398.745	-58.5977	-70.8434	265.762	-57.6128	301.919	222.419	396.601	233.158	-10.6776	318.498	41.2968
1658	455004	'Chardonnay' x V. cinerea B9	right	318.688	-19.6788	-430.409	-691.297	180.59	-136.68	-312.121	-138.309	-407.727	-38.2586	-52.8841	272.162	-41.84	303.411	281.209	377.756	187.743	3.26835	276.75	67.6257
1659	455004	'Chardonnay' x V. cinerea B9	right	373.539	-20.0487	-449.788	-628.842	234.565	-136.581	-279.784	-119.13	-416.661	6.47872	-124.844	227.296	-105.616	274.876	243.718	349.018	175.227	6.95549	349.642	39.9775
1660	455004	'Chardonnay' x V. cinerea B9	right	362.494	-32.1999	-428.184	-594.758	182.891	-172.479	-276.583	-154.637	-452.892	-64.2523	-80.2355	271.004	-81.9514	336.202	251.725	396.871	196.548	-3.10146	326.189	17.3505
1661	455004	'Chardonnay' x V. cinerea B9	right	318.208	-26.0357	-380.598	-687.233	170.224	-138.022	-321.759	-134.887	-465.145	-37.3981	-39.6786	262.745	-35.1104	321.22	305.629	365.199	169.493	3.23188	278.737	71.1791
1662	455004	'Chardonnay' x V. cinerea B9	right	333.501	-33.3285	-379.819	-621.227	160.099	-167.99	-340.309	-171.607	-438.776	-66.7669	-71.0102	297.276	-60.1265	337.985	318.435	391.625	179.611	-5.27185	298.395	39.3049
1663	455005	'Chardonnay' x V. cinerea B9	right	331.38	-46.3803	-297.324	-619.349	134.027	-183.238	-296.977	-136.339	-536.01	-59.0847	-57.9617	309.134	-63.2512	366.284	332.453	357.195	157.876	-11.4248	295.788	23.2029
1664	455005	'Chardonnay' x V. cinerea B9	right	331.566	1.79977	-457.625	-670.878	169.802	-160.611	-239.761	-121.618	-433.276	-48.0701	-55.646	239.893	-89.906	308.072	302.38	377.103	192.245	-7.00948	280.222	81.3194
1665	455005	'Chardonnay' x V. cinerea B9	right	297.306	-27.763	-338.529	-636.67	125.91	-174.842	-307.201	-171.395	-475.737	-122.231	-55.2834	323.14	-15.6243	403.177	358.276	328.288	144.786	12.7615	266.095	65.5326
1666	455005	'Chardonnay' x V. cinerea B9	right	315.944	-61.12	-352.308	-668.242	146.292	-179.956	-238.606	-101.942	-506.392	-35.0182	-55.5023	263.14	-75.8374	371.478	304.833	381.101	169.959	-7.28111	291.617	37.8415
1667	455005	'Chardonnay' x V. cinerea B9	right	325.561	5.40551	-485.578	-598.888	159.947	-179.732	-167.982	-148.526	-463.609	-131.313	-76.3694	267.474	-65.7248	338.528	296.237	377.57	194.14	-2.94428	283.379	72.4259
1668	455005	'Chardonnay' x V. cinerea B9	right	322.919	-1.11443	-401.82	-683.431	151.452	-187.568	-290.578	-148.568	-444.508	-31.0749	-61.9058	292.619	-20.6329	313.242	282.541	374.272	177.69	5.27164	284.843	66.352
1669	455006	'Chardonnay' x V. cinerea B9	right	293.085	-34.6088	-361.832	-672.978	134.887	-184.66	-186.875	-119.448	-521.969	-43.8705	-72.3604	272.195	-54.0785	375.005	332.845	366.085	168.666	-2.04135	267.633	44.323
1670	455006	'Chardonnay' x V. cinerea B9	right	312.736	-33.8247	-359.582	-677.044	167.095	-183.103	-298.852	-137.437	-460.863	-26.5389	-78.8004	305.636	-47.3178	357.009	302.122	352.054	179.779	-1.00547	283.683	44.2542
1671	455006	'Chardonnay' x V. cinerea B9	right	292.138	-7.53721	-372.621	-675.397	140.268	-151.995	-281.764	-148.355	-477.574	-67.8184	13.5337	205.67	-61.2243	402.835	342.568	374.117	144.721	10.8301	259.954	57.6502
1672	455006	'Chardonnay' x V. cinerea B9	right	337.387	-42.238	-356.926	-654.729	186.476	-158.709	-304.573	-113.03	-481.038	-26.3549	-107.219	301.746	-65.0917	332.662	278.807	325.399	184.909	15.9072	327.269	19.346
1673	455006	'Chardonnay' x V. cinerea B9	right	309.276	-51.9031	-380.684	-656.975	171.635	-171.336	-313.917	-135.532	-421.931	-58.5278	-75.5933	307.55	-63.2854	362.912	304.382	388.43	179.694	-17.3487	290.424	32.7311
1674	455006	'Chardonnay' x V. cinerea B9	right	299.156	-42.6254	-405.826	-703.499	158.344	-178.773	-134.239	-109.285	-487.684	5.93757	-57.6118	259.853	-70.6894	364.12	261.762	366.877	165.271	-3.1809	271.517	40.5757
1675	455012	'Chardonnay' x V. cinerea B9	right	280.053	-18.9266	-316.178	-738.257	142.148	-150.012	-298.062	-100.982	-466.588	-13.7886	-61.2646	296.271	-31.0454	348.636	350.936	317.486	144.944	15.0228	255.056	44.5503
1676	455012	'Chardonnay' x V. cinerea B9	right	290.637	-29.3797	-336.563	-677.023	154.044	-162.482	-274.743	-153.995	-509.769	-38.7518	-55.1646	279.497	-31.6592	362.73	356.933	352.964	148.545	10.3594	257.74	56.0819
1677	455012	'Chardonnay' x V. cinerea B9	right	312.808	2.01154	-449.17	-689.472	160.335	-151.185	-292.668	-162.331	-385.669	-60.4718	-51.6755	266.267	-34.0559	325	307.706	375.745	157.377	7.56358	275.013	86.873
1678	455012	'Chardonnay' x V. cinerea B9	right	256.506	13.6714	-397.679	-732.948	127.956	-147.174	-283.05	-161.095	-382.696	-87.4624	-40.5857	315.774	4.30038	370.193	355.179	303.915	126.826	27.4504	233.244	97.6761
1679	455012	'Chardonnay' x V. cinerea B9	right	262.373	-11.9089	-341.309	-712.69	117.902	-148.178	-278.612	-159.165	-452.651	-62.538	-40.8779	281.356	-18.8514	392.909	385.942	330.031	118.761	23.2515	247.323	66.9333
1680	455012	'Chardonnay' x V. cinerea B9	right	280.3	-21.8108	-370.055	-724.493	154.44	-145.221	-284.359	-140.953	-452.865	-48.3541	-27.826	309.836	-15.7498	352.146	321.168	334.835	150.273	15.4268	244.674	68.5883
1681	455013	'Chardonnay' x V. cinerea B9	right	358.431	9.48595	-481.806	-658.343	190.29	-155.925	-264.093	-138.889	-416.682	-56.5001	-55.8142	236.186	-55.061	294.295	261.577	368.612	190.502	14.051	272.656	87.0284
1682	455013	'Chardonnay' x V. cinerea B9	right	310.622	-10.4771	-421.699	-663.251	149.324	-166.054	-268.864	-165.789	-448.606	-52.8643	-53.8853	275.409	-44.7342	334.618	298.386	388.528	197.213	-3.84738	282.243	63.7275
1683	455013	'Chardonnay' x V. cinerea B9	right	297.44	-19.6294	-367.176	-674.354	134.682	-173.109	-280.105	-152.308	-487.268	-53.7889	-37.108	296.099	-38.3852	346.198	317.164	368.001	181.026	7.83514	279.73	55.0563
1684	455013	'Chardonnay' x V. cinerea B9	right	324.813	-22.3828	-398.334	-617.872	151.462	-162.124	-247.392	-177.794	-512.757	-69.5623	-61.1804	257.564	-57.4604	347.28	326.809	377.789	185.243	0.89595	288.798	66.2064
1685	455013	'Chardonnay' x V. cinerea B9	right	327.722	-24.8575	-417.975	-651.852	174.921	-170.5	-272.517	-150.236	-423.95	-40.1815	-101.558	288.822	-84.4646	339.24	305.341	366.422	172.76	4.27407	319.721	38.8698
1686	455013	'Chardonnay' x V. cinerea B9	right	347.531	-3.68093	-424.439	-680.332	204.049	-157.883	-255.034	-111.38	-417.806	53.1376	-113.988	217.887	-110.846	296.779	267.675	353.197	187.643	-2.95755	315.216	35.2334
1687	455014	'Chardonnay' x V. cinerea B9	right	335.732	-32.7317	-419.544	-643.869	172.507	-172.441	-308.283	-159.955	-392.627	-43.5427	-91.5248	277.484	-82.4946	323.257	328.863	402.708	171.38	-5.33211	285.992	54.4233
1688	455014	'Chardonnay' x V. cinerea B9	right	318.713	-35.024	-382.051	-694.84	161.087	-177.831	-240.853	-117.055	-468.177	-19.3764	-71.3196	296.145	-61.2288	340.481	300.798	367.049	165.681	-0.42523	277.35	40.8765
1689	455014	'Chardonnay' x V. cinerea B9	right	363.63	4.56894	-421.727	-633.586	100.465	-164.883	-172.216	-130.801	-531.794	-63.2449	-35.6681	178.172	-46.5028	322.141	298.66	395.127	146.468	12.8827	298.686	79.624
1690	455014	'Chardonnay' x V. cinerea B9	right	349.078	-34.4007	-421.985	-652.804	151.18	-175.312	-223.824	-152.612	-441.766	-19.8461	-103.294	286.488	-90.3017	337.97	289.014	369.59	184.314	-9.34679	307.584	50.2728
1691	455014	'Chardonnay' x V. cinerea B9	right	380.173	28.7145	-424.74	-662.581	144.49	-146.737	-234.877	-139.53	-496.524	-32.5638	-46.356	195.487	-69.2044	331.228	288.598	301.357	149.987	16.6173	308.453	108.008
1692	455014	'Chardonnay' x V. cinerea B9	right	375.655	-9.90344	-473.359	-614.108	148.451	-190.912	-162.478	-127.955	-473.032	-33.9847	-40.7148	193.16	-120.147	293.382	257.388	399.8	180.688	6.37691	307.549	84.1452
1693	455015	'Chardonnay' x V. cinerea B9	right	389.923	-30.4521	-413.804	-624.656	189.57	-187.249	-300.626	-117.744	-444.994	-22.2	-88.1482	269.011	-82.38	306.268	231.585	363.997	207.723	-15.3633	311.15	58.3889
1694	455015	'Chardonnay' x V. cinerea B9	right	300.509	-19.4693	-345.605	-683.407	135.432	-186.87	-256.013	-147.229	-486.671	-20.44	-69.8483	301.769	-46.6809	354.166	340.679	364.427	152.161	-9.455	276.037	46.5084
1695	455015	'Chardonnay' x V. cinerea B9	right	314.646	-30.6128	-374.071	-684.207	154.54	-203	-287.905	-135.729	-414.583	-14.2735	-77.7547	293.879	-50.107	360.483	305.533	402.301	156.152	-28.6675	273.55	39.8261
1696	455015	'Chardonnay' x V. cinerea B9	right	396.91	-27.3169	-441.562	-605.343	166.807	-166.182	-325.874	-141.793	-399.778	-48.0474	-99.0776	245.208	-75.424	292.862	253.27	389.101	200.871	-14.0965	323.858	75.6078
1697	455015	'Chardonnay' x V. cinerea B9	right	391.737	-0.684683	-473.771	-603.609	180.025	-157.902	-285.003	-113.483	-429.185	-49.8763	-71.5346	212.323	-75.4055	258.752	209.307	389.742	227.814	-5.41356	326.017	70.1507
1698	455015	'Chardonnay' x V. cinerea B9	right	296.303	-38.0669	-322.856	-687.601	156.053	-173.647	-309.376	-162.813	-470.356	-10.7548	-65.8323	322.743	-28.9253	363.8	329.009	336.407	159.27	-15.9452	256.71	65.8782
1699	455016	'Chardonnay' x V. cinerea B9	right	307.507	-17.3917	-392.942	-701.485	145.639	-170.12	-82.9721	-116.155	-503.11	42.9997	-6.25458	156.211	-98.5348	376.929	293.776	367.296	77.4861	13.0561	259.405	48.6593
1700	455016	'Chardonnay' x V. cinerea B9	right	291.62	-54.3367	-338.88	-659.675	123.735	-187.006	-109.573	-146.235	-549.528	3.80714	-77.5924	312.583	-44.5025	366.67	292.413	376.868	152.487	-21.6284	259.822	8.95336
1701	455016	'Chardonnay' x V. cinerea B9	right	335.211	-25.9599	-403.331	-635.263	182.744	-172.975	-273.863	-161.507	-455.722	-43.9984	-105.605	291.835	-53.8407	348.402	297.668	374.414	177.083	-11.6872	299.656	36.7389
1702	455016	'Chardonnay' x V. cinerea B9	right	301.291	-46.1252	-349.531	-693.151	161.689	-173.293	-178.202	-112.738	-528.777	20.2215	-61.0185	245.486	-44.6426	349.588	299.864	392.993	128.274	-5.10313	271.053	22.1214
1703	455016	'Chardonnay' x V. cinerea B9	right	320.007	-33.9974	-444.817	-686.59	151.26	-193.036	-108.728	-128.043	-457.994	8.48243	-72.126	278.747	-52.9826	337.861	221.198	383.624	182.262	-21.3922	261.919	54.345
1704	455016	'Chardonnay' x V. cinerea B9	right	357.636	-17.6113	-439.556	-609.798	194.712	-166.911	-234.76	-174.907	-465.859	-17.7711	-101.146	252.396	-80.7729	321.022	267.084	388.726	197.637	-7.95583	305.026	32.8103
1705	455017	'Chardonnay' x V. cinerea B9	right	345.526	-27.217	-361.164	-621.669	172.533	-167.224	-335.903	-150.97	-469.228	-35.2137	-103.315	282.462	-70.9939	335.048	311.709	352.602	199.586	-13.1894	311.249	45.3708
1706	455017	'Chardonnay' x V. cinerea B9	right	317.039	-28.5486	-375.624	-634.743	169.219	-148.734	-299.997	-170.487	-505.989	-54.711	-51.4914	273.882	-51.1512	342.735	306.632	357.761	195.752	9.55697	295.611	53.2874
1707	455017	'Chardonnay' x V. cinerea B9	right	323.09	-34.174	-394.643	-645.412	148.272	-189.907	-217.729	-122.004	-481.249	-83.4031	-97.0533	311.108	-53.2459	370.232	305.464	360.151	173.258	-14.8932	293.836	48.3025
1708	455017	'Chardonnay' x V. cinerea B9	right	339.415	-15.4176	-380.4	-620.857	184.238	-170.609	-314.699	-173.635	-481.618	-33.4741	-97.7645	284.847	-58.1564	329.707	301.275	336.489	195.863	-2.62119	311.846	65.5718
1709	455017	'Chardonnay' x V. cinerea B9	right	304.145	-19.6586	-377.555	-670.005	140.461	-168.849	-289.223	-169.418	-473.721	-57.0716	-59.0598	292.959	-18.2969	344.617	319.934	364.455	172.905	24.6478	280.412	58.3239
1710	455017	'Chardonnay' x V. cinerea B9	right	323.783	-30.2334	-351.46	-681.929	161.752	-172.901	-261.659	-122.153	-507.191	-7.44194	-78.5995	288.175	-43.8799	332.812	296.19	352.155	169.623	6.86451	291.441	34.6531
1711	455018	'Chardonnay' x V. cinerea B9	right	296.891	-16.1077	-374.992	-660.381	156.321	-163.158	-242.686	-155.499	-502.499	-86.0739	-65.7918	280.175	-22.1636	378.474	354.251	349.074	136.028	16.4598	264.641	57.0373
1712	455018	'Chardonnay' x V. cinerea B9	right	318.527	-27.8569	-416.942	-639.356	153.205	-163.667	-221.336	-142.993	-461.778	-83.7315	-106.695	285.395	-77.1659	341.92	357.428	376.503	165.557	10.78	289.2	43.0076
1713	455018	'Chardonnay' x V. cinerea B9	right	317.727	2.18815	-374.65	-685.357	149.565	-171.725	-232.871	-144.035	-497.553	-37.0193	-56.1301	292.445	-60.493	346.57	337.463	332.901	139.627	17.7373	277.315	46.2945
1714	455018	'Chardonnay' x V. cinerea B9	right	292.082	-19.3837	-361.877	-695.063	118.077	-179.934	-302.816	-159.132	-431.746	-48.9294	-55.565	310.634	-44.2672	345.411	358.633	351.157	161.028	19.6427	266.451	75.5971
1715	455018	'Chardonnay' x V. cinerea B9	right	293.725	-8.11351	-397.33	-682.496	139.322	-152.987	-231.401	-147.435	-473.495	-76.3058	-58.5101	300.586	-51.3187	341.838	358.999	354.643	151.497	14.2358	268.512	56.0346
1716	455018	'Chardonnay' x V. cinerea B9	right	333.833	-1.57813	-441.86	-695.048	161.886	-141.866	-252.626	-128.996	-438.08	-49.2052	-62.6997	275.951	-42.8958	311.132	274.76	349.27	168.457	17.3867	299.226	62.9534
1717	455019	'Chardonnay' x V. cinerea B9	right	282.325	-11.1381	-380.225	-740.431	98.6251	-192.145	-136.497	-100.639	-486.826	-11.7177	-2.96951	232.567	-42.9333	382.097	293.343	354.118	129.738	20.5988	245.419	66.6903
1718	455019	'Chardonnay' x V. cinerea B9	right	303.435	-36.8225	-394.616	-677.528	111.808	-209.549	-122.096	-134.122	-483.625	-38.3459	-21.3583	224.357	-29.2721	417.208	279.371	418.883	109.993	-6.77613	246.36	42.6954
1719	455019	'Chardonnay' x V. cinerea B9	right	326.79	17.5107	-460.164	-661.996	107.847	-195.223	-95.3141	-110.698	-486.225	-103.281	-29.5082	214.872	-38.9699	364.385	290.132	367.991	121.584	29.5938	263.828	76.8473
1720	455019	'Chardonnay' x V. cinerea B9	right	292.507	-1.18563	-387.138	-692.787	99.59	-191.739	-208.434	-151.038	-466.154	-42.9963	-31.6768	238.286	-14.6051	371.342	328.502	422.265	132.664	3.07509	254.744	44.7781
1721	455019	'Chardonnay' x V. cinerea B9	right	290.396	-51.5141	-370.797	-731.832	97.8631	-203.908	-139.276	-110.782	-436.544	-0.630888	-66.6188	276.897	-75.6154	399.136	324.871	355.327	117.209	15.1529	258.512	52.154
1722	455019	'Chardonnay' x V. cinerea B9	right	289.456	-5.13519	-388.415	-720.47	139.86	-171.19	-257.863	-118.765	-462.544	-59.4211	-17.1038	222.574	16.3146	362.392	317.704	374.68	116.42	20.1159	246.172	95.2197
1723	455020	'Chardonnay' x V. cinerea B9	right	302.436	-19.3642	-307.928	-689.466	161.372	-171.05	-317.058	-151.291	-494.628	0.145507	-35.1442	238.145	-35.0513	388.31	341.495	340.492	122.203	12.9768	262.304	51.1012
1724	455020	'Chardonnay' x V. cinerea B9	right	282.093	4.25233	-364.478	-733.516	111.254	-205.738	-131.952	-129.728	-508.368	5.36602	-20.9515	241.996	-6.71531	391.48	289.81	324.187	122.345	19.8242	226.964	81.8771
1725	455020	'Chardonnay' x V. cinerea B9	right	296.931	-20.3626	-410.191	-707.127	129.147	-199.725	-144.138	-124.449	-460.767	-41.5097	-53.9619	300.017	-53.0408	360.986	317.386	359.245	127.865	-6.24261	250.77	79.1691
1726	455020	'Chardonnay' x V. cinerea B9	right	282.377	0.217566	-422.762	-703.958	114.347	-187.749	-150.171	-143.084	-454.478	-44.3521	-23.2215	229.181	-57.7761	371.569	347.102	385.083	129.559	6.14032	235.025	86.9535
1727	455020	'Chardonnay' x V. cinerea B9	right	313.291	-2.79246	-395.299	-678.029	152.686	-153.636	-277.313	-154.517	-467.434	-66.8845	-85.0041	287.184	-14.9973	351.635	324.984	330.334	184.603	17.0299	264.483	69.6761
1728	455020	'Chardonnay' x V. cinerea B9	right	265.133	-21.6226	-356.328	-694.576	99.1793	-201.96	-117.465	-142.6	-507.828	-49.2346	-62.1228	329.873	-17.4654	376.253	342.364	350.304	124.544	3.73795	229.989	49.827
1729	455021	'Chardonnay' x V. cinerea B9	right	365.692	-14.6355	-443.026	-608.408	193.575	-161.092	-251.711	-160.217	-477.196	-53.0781	-92.1428	258.944	-63.0053	314.735	260.949	366.861	193.28	2.58767	313.584	54.3025
1730	455021	'Chardonnay' x V. cinerea B9	right	295.717	-10.8138	-406.734	-678.253	136.979	-158.934	-188.145	-148.335	-526.16	-40.9479	-31.5299	268.273	-16.9707	315.778	282.497	381.862	187.933	9.15792	266.413	62.2125
1731	455021	'Chardonnay' x V. cinerea B9	right	351.637	24.519	-488.596	-645.369	170.559	-156.813	-237.265	-135.045	-439.86	-70.5076	-61.0863	228.263	-53.071	293.077	251.77	361.388	205.84	16.2271	300.071	84.2612
1732	455021	'Chardonnay' x V. cinerea B9	right	343.48	23.9341	-442.238	-640.94	151.164	-148.351	-316.554	-175.707	-429.636	-84.9373	-45.6379	246.321	-43.1783	309.175	317.112	366.73	180.906	16.7337	284.581	87.042
1733	455021	'Chardonnay' x V. cinerea B9	right	324.547	-16.4585	-380.366	-679.082	139.371	-171.249	-306.17	-148.179	-453.944	-45.6263	-49.0078	282.611	-37.0588	337.383	307.209	371.564	163.901	11.1253	291.518	57.9102
1734	455021	'Chardonnay' x V. cinerea B9	right	364.625	3.86708	-478.327	-665.83	190.67	-159.35	-288.074	-133.846	-377.752	-21.4204	-79.3096	236.295	-70.1296	276.328	245.855	360.624	188.325	21.5396	304.117	81.7926
1735	455022	'Chardonnay' x V. cinerea B9	right	292.63	-10.9233	-330.936	-712.948	148.672	-157.361	-290.073	-152.776	-505.435	-19.1265	-18.9565	276.23	9.49192	359.855	312.489	329.113	139.7	16.5711	242.418	71.3656
1736	455022	'Chardonnay' x V. cinerea B9	right	367.678	5.45373	-498.347	-644.049	161.56	-181.697	-195.103	-129.092	-428.425	-44.1699	-59.2269	227.569	-67.141	290.064	221.752	382.236	217.626	7.10438	279.626	86.582
1737	455022	'Chardonnay' x V. cinerea B9	right	345.075	-55.6518	-361.804	-638.901	129.525	-210.429	-218.646	-143.087	-533.082	-42.5625	-31.0572	268.556	-20.8186	355.96	265.996	404.855	155.456	-7.11722	269.355	68.3791
1738	455022	'Chardonnay' x V. cinerea B9	right	298.83	-27.0322	-386.52	-738.671	178.753	-140.249	-318.895	-129.539	-401.977	16.0322	-54.0379	275.485	-23.3229	307.933	286.351	360.518	157.791	11.3424	263.028	64.1798
1739	455022	'Chardonnay' x V. cinerea B9	right	351.038	-51.6732	-316.642	-639.034	168.067	-183.608	-332.524	-147.341	-512.744	-2.38091	-63.1993	286.411	-39.2367	329.096	282.318	361.9	171.539	-1.42794	291.384	48.0576
1740	455022	'Chardonnay' x V. cinerea B9	right	278.304	-60.6875	-275.425	-705.68	110.925	-191.728	-254.643	-131.688	-500.391	-3.18486	-38.0684	335.878	-13.9784	394.895	303.493	352.128	138.66	-20.8714	251.122	30.9388
1741	455023	'Chardonnay' x V. cinerea B9	right	252.295	-52.1962	-310.137	-763.957	100.627	-165.771	-142.367	-83.2648	-504.248	35.9184	-50.6225	282.557	-38.8006	364.873	316.605	324.1	138.657	14.5325	237.991	43.2072
1742	455023	'Chardonnay' x V. cinerea B9	right	316.948	-12.8901	-478.93	-649.518	158.068	-182.837	-98.1826	-119.302	-482.458	-53.8969	-47.2189	228.129	-85.889	329.955	255.074	379.392	175.026	18.0643	287.564	62.9029
1743	455023	'Chardonnay' x V. cinerea B9	right	325.344	-19.1282	-431.805	-667.073	158.477	-197.087	-146.615	-137.198	-488.267	-5.54555	-56.2742	252.906	-76.7776	335.835	263.519	384.272	169.409	-1.78267	282.99	54.8016
1744	455023	'Chardonnay' x V. cinerea B9	right	297.677	-17.7927	-364.773	-695.273	134.222	-195.799	-195.268	-133.292	-527.406	-23.618	-38.4056	313.764	8.0997	330.364	264.532	360.21	164.152	-3.15283	257.169	64.5903
1745	455023	'Chardonnay' x V. cinerea B9	right	320.653	-14.855	-448.895	-650.247	127.517	-210.689	-124.624	-133.201	-472.778	-54.9388	-81.6899	277.828	-55.9274	318.746	290.608	405.299	170.588	0.904301	274.548	61.1536
1746	455023	'Chardonnay' x V. cinerea B9	right	343.385	10.634	-441.456	-652.299	171.875	-174.99	-252.895	-151.658	-451.809	-35.1948	-68.891	257.532	-78.0324	318.295	280.689	358.832	189.109	8.04582	308.025	60.8038
1747	455024	'Chardonnay' x V. cinerea B9	right	256.019	-23.9742	-337.276	-725.765	134.7	-159.235	-254.998	-135.138	-493.758	-38.5052	-8.87256	290.452	4.96961	386.514	305.164	343.257	149.679	3.60602	244.373	58.7892
1748	455024	'Chardonnay' x V. cinerea B9	right	265.793	-38.303	-299.476	-716.126	144.326	-153.266	-268.879	-123.861	-517.162	-4.21179	-36.3858	287.425	-21.0381	364.969	335.565	344.753	149.456	-5.20472	247.801	43.8254
1749	455024	'Chardonnay' x V. cinerea B9	right	274.843	-19.0703	-350.542	-727.26	144.724	-144.261	-296.773	-135.126	-448.975	-23.2362	-42.3149	285.682	-27.6978	347.104	348.649	357.158	149.293	4.14796	248.793	54.863
1750	455024	'Chardonnay' x V. cinerea B9	right	311.138	-10.0153	-458.935	-706.718	184.248	-164.074	-247.267	-130.854	-410.912	-35.97	-26.6189	256.465	-37.9561	319.105	258.059	379.028	169.666	4.17156	258.578	88.8615
1751	455024	'Chardonnay' x V. cinerea B9	right	278.189	-20.9259	-371.66	-676.737	162.536	-145.384	-294.61	-166.304	-468.93	-85.3429	-39.5344	304.479	-11.577	364.201	348.773	353.553	150.39	5.70685	246.424	66.754
1752	455024	'Chardonnay' x V. cinerea B9	right	325.06	-25.1708	-437.085	-683.696	183.377	-164.806	-248.804	-132.932	-432.159	-14.5671	-61.2211	251.017	-61.3544	311.336	280.082	399.901	169.417	-7.09875	282.688	66.0153
1753	455025	'Chardonnay' x V. cinerea B9	right	346.644	-40.9339	-392.183	-667.466	170.633	-158.562	-249.624	-129.223	-468.418	-14.7759	-74.4111	267.606	-99.3357	354.657	292.2	356.118	178.926	0.218123	295.568	32.3613
1754	455025	'Chardonnay' x V. cinerea B9	right	335.346	-40.1709	-437.196	-641.26	177.273	-168.305	-223.35	-139.396	-444.867	-44.1116	-72.3929	267.7	-98.8713	337.091	286.548	404.808	174.816	-8.84741	302.694	32.4919
1755	455025	'Chardonnay' x V. cinerea B9	right	341.249	1.57155	-507.13	-625.716	191.659	-126.675	-236.236	-146.004	-415.981	-83.7549	-77.1451	244.34	-63.7449	287.348	245.021	376.407	202.331	12.2433	319.978	60.2393
1756	455025	'Chardonnay' x V. cinerea B9	right	333.397	-8.44605	-432.889	-618.855	158.105	-193.103	-238.38	-167.892	-469.382	-59.0194	-60.4563	249.222	-80.6821	337.622	306.342	397.548	189.618	-5.56261	294.327	68.4866
1757	455025	'Chardonnay' x V. cinerea B9	right	326.121	-40.0779	-411.577	-669.138	185.091	-144.673	-302.633	-125.037	-421.975	-56.7919	-76.887	273.284	-67.0061	337.297	306.709	380.925	167.996	4.48108	294.161	39.7302
1758	455025	'Chardonnay' x V. cinerea B9	right	313.15	-67.2442	-361.793	-595.597	163.129	-168.534	-288.659	-164.45	-478.678	-104.475	-74.648	277.438	-57.9755	396.714	351.645	404.529	156.128	-17.2732	277.701	38.8931
1759	455028	'Chardonnay' x V. cinerea B9	right	289.636	-16.8727	-346.165	-688.952	150.34	-153.44	-303.031	-155.58	-465.539	-55.3051	-52.9763	318.248	-35.7829	358.065	360.76	332.137	146.385	-3.15171	256.373	64.8512
1760	455028	'Chardonnay' x V. cinerea B9	right	331.37	-20.4152	-405.26	-711.383	165.035	-158.377	-275.964	-126.224	-436.89	-7.3003	-63.2784	260.498	-52.2896	323.466	292.924	351.369	165.209	15.1933	279.144	73.1729
1761	455028	'Chardonnay' x V. cinerea B9	right	349.048	19.3606	-441.262	-693.225	192.678	-166.162	-333.567	-128.89	-364.943	-36.327	-88.6025	280.338	-19.9651	305.033	252.612	318.513	161.366	18.5335	292.637	82.8255
1762	455028	'Chardonnay' x V. cinerea B9	right	315.274	-7.41509	-439.053	-701.118	175.128	-153.423	-272.345	-131.76	-421.673	-44.5322	-60.1167	257.957	-36.1783	325.612	289.102	356.498	171.746	11.6659	278.116	86.5146
1763	455028	'Chardonnay' x V. cinerea B9	right	312.645	-39.3158	-325.531	-681.208	154.96	-179.314	-302.11	-143.419	-474.128	-3.00311	-71.9063	276.767	-53.4377	367.006	341	363.513	145.457	-6.20097	273.05	45.1732
1764	455028	'Chardonnay' x V. cinerea B9	right	341.965	-27.0379	-376.544	-635.619	182.275	-175.245	-304.05	-158.456	-453.571	-5.47827	-113.982	269.556	-82.0194	326.026	324.236	371.955	168.829	-3.60143	312.86	37.9007
1765	455029	'Chardonnay' x V. cinerea B9	right	339.48	-44.9147	-419.625	-635.574	162.432	-176.36	-282.98	-113.248	-397.894	-89.2337	-108.893	292.909	-95.7221	340.717	334.371	391.306	172.7	-13.996	296.13	48.394
1766	455029	'Chardonnay' x V. cinerea B9	right	344.222	-22.444	-390.929	-668.4	166.318	-161.622	-302.944	-136.7	-451.592	-46.0998	-77.4684	281.364	-49.5713	338.957	302.925	355.278	161.612	2.56031	297.427	57.1071
1767	455029	'Chardonnay' x V. cinerea B9	right	299.879	-21.9887	-358.18	-672.234	156.196	-165.093	-341.918	-156.199	-444.948	-55.1794	-54.3319	303.81	-36.2307	352.935	328.655	353.77	182.98	1.9773	267.899	58.2012
1768	455029	'Chardonnay' x V. cinerea B9	right	308.099	-29.8562	-384.509	-675.247	139.534	-170.929	-290.994	-160.088	-451.678	-69.9105	-39.8214	299.767	-31.4349	359.74	315.472	372.672	166.144	12.9614	269.188	60.8902
1769	455029	'Chardonnay' x V. cinerea B9	right	286.329	-49.3751	-331.252	-695.825	150.616	-164.562	-325.594	-155.348	-446.897	-39.2678	-40.4256	331.242	-17.6427	361.4	326.292	356.425	149.645	-8.83533	248.927	64.1458
1770	455029	'Chardonnay' x V. cinerea B9	right	303.33	-17.6484	-382.724	-704.17	149.897	-169.843	-315.854	-155.606	-414.981	-31.3198	-48.2928	296.902	-33.341	342.955	316.983	364.281	165.851	8.44839	259.13	65.9999
1771	455030	'Chardonnay' x V. cinerea B9	right	280.058	-51.3462	-401.377	-721.472	147.061	-179.715	-199.351	-120.723	-406.553	-26.0334	-73.3576	308.729	-62.924	361.884	325.215	389.944	139.85	0.814518	251.379	37.917
1772	455030	'Chardonnay' x V. cinerea B9	right	307.246	-17.6236	-409.898	-646.988	140.918	-187.263	-298.541	-150.927	-403.183	-119.509	-65.5133	315.525	-46.2662	363.158	341.939	380.127	160.938	0.753909	272.362	62.7467
1773	455030	'Chardonnay' x V. cinerea B9	right	321.703	13.0613	-448.546	-707.514	142.978	-175.903	-186.69	-119.395	-430.768	-40.1891	-80.6541	280.64	-56.9875	326.015	298.097	342.829	162.681	9.42421	278.186	71.0313
1774	455030	'Chardonnay' x V. cinerea B9	right	299.396	-39.1523	-386.95	-669.75	165.652	-169.955	-250.618	-178.299	-456.524	-39.6122	-68.0657	318.397	-50.846	365.859	319.936	366.932	156.617	0.909202	271.402	44.6717
1775	455030	'Chardonnay' x V. cinerea B9	right	273.857	-29.9821	-386.3	-666.265	134.867	-168.38	-159.01	-124.033	-489.119	-103.73	-88.729	313.006	-56.9451	371.732	386.221	346.665	129.217	9.52306	255.941	51.4637
1776	455030	'Chardonnay' x V. cinerea B9	right	312.067	-2.66523	-444.562	-675.943	167.294	-169.674	-223.888	-159.575	-434.814	-75.9629	-61.917	313.543	-37.8014	346.773	291.642	354.63	156.754	12.1778	275.226	56.6953
1777	455031	'Chardonnay' x V. cinerea B9	right	311.117	-16.2501	-386.95	-708.08	167.013	-139.578	-248.317	-111.744	-486.238	-18.26	-75.6331	274.637	-43.4602	319.175	302.018	338.744	172.359	14.41	288.092	46.9468
1778	455031	'Chardonnay' x V. cinerea B9	right	340.143	-23.3499	-381.602	-659.4	162.001	-166.338	-303.127	-152.295	-480.243	-50.2433	-54.4783	272.024	-17.8252	345.271	288.167	372.961	174.686	2.59647	272.278	58.7727
1779	455031	'Chardonnay' x V. cinerea B9	right	286.072	2.05326	-396.604	-719.395	131.843	-152.12	-288.987	-133.805	-408.398	-61.7365	-56.0269	289.976	-34.4914	354.45	342.998	348.898	171.805	7.66536	251.789	64.0141
1780	455031	'Chardonnay' x V. cinerea B9	right	302.572	-22.7211	-374.345	-630.534	173.036	-166.094	-263.166	-194.618	-484.513	-69.0353	-70.0566	299.918	-59.7429	380.858	358.377	355.281	146.484	10.0541	271.355	36.8901
1781	455031	'Chardonnay' x V. cinerea B9	right	266.988	-20.782	-359.635	-703.866	134.331	-172.846	-204.724	-135.663	-493.583	-63.5098	-52.0686	321.615	-15.5957	374.859	343.051	342.377	138.728	-0.779882	242.508	58.595
1782	455031	'Chardonnay' x V. cinerea B9	right	282.684	19.4599	-381.313	-734.707	156.678	-157.032	-258.221	-152.022	-457.656	3.29489	-48.1314	269.083	-11.6593	348.239	310.592	332.994	167.868	11.6137	239.16	59.0769
1783	455032	'Chardonnay' x V. cinerea B9	right	331.484	19.322	-439.636	-689.038	186.747	-115.271	-286.79	-137.8	-459.329	-21.3805	-53.8924	230.953	-13.5665	263.999	254.155	348.579	168.174	36.2885	312.654	64.3483
1784	455032	'Chardonnay' x V. cinerea B9	right	350.338	-15.8725	-435.639	-628.689	184.081	-134.328	-284.129	-137.224	-470.076	-52.2697	-81.1639	215.024	-72.1206	305.503	292.201	370.144	201.41	2.3479	315.099	75.3637
1785	455032	'Chardonnay' x V. cinerea B9	right	288.236	-17.8181	-383.086	-713.02	142.174	-146.246	-297.999	-135.248	-452.11	-67.6514	-10.5339	275.577	-6.16042	343.035	313.913	368.304	144.992	23.8111	260.574	69.2562
1786	455032	'Chardonnay' x V. cinerea B9	right	345.758	-45.6347	-393.37	-637.191	189.59	-162.595	-314.466	-162.522	-460.787	-46.1639	-61.7264	291.038	-55.6352	344.185	275.794	360.242	191.175	-8.25704	283.668	66.8985
1787	455032	'Chardonnay' x V. cinerea B9	right	297.784	-2.96997	-419.24	-585.011	151.462	-168.99	-164.494	-143.464	-534.632	-148.459	-13.4641	201.397	-80.1525	403.675	353.974	372.7	147.694	-1.35604	261.068	72.4784
1788	455032	'Chardonnay' x V. cinerea B9	right	352.454	-10.837	-398.206	-644.068	175.255	-148.203	-305.406	-156.194	-485.48	-30.4588	-80.9093	261.891	-31.135	283.789	289.409	365.402	168.692	15.2527	315.326	63.4265
1789	455033	'Chardonnay' x V. cinerea B9	right	317.926	-2.16807	-468.173	-672.845	161.023	-163.986	-199.382	-155.535	-454.892	-46.1863	-42.6042	250.509	-46.3106	319.175	266.123	374.185	201.747	6.40949	264.542	90.4417
1790	455033	'Chardonnay' x V. cinerea B9	right	294.685	-8.34761	-388.425	-725.936	142.435	-157.868	-278.407	-136.037	-442.918	-12.9956	-31.9164	274.53	-32.536	333.609	298.555	358.694	170.151	-3.75917	268.376	78.1095
1791	455033	'Chardonnay' x V. cinerea B9	right	245.906	-35.4025	-217.81	-656.839	113.848	-162.526	-309.405	-187.203	-530.903	-30.2407	-28.6045	328.607	7.59332	421.602	361.588	317.212	129.406	-3.97267	228.381	8.76302
1792	455033	'Chardonnay' x V. cinerea B9	right	323.555	-27.4272	-323.74	-654.178	159.307	-178.171	-314.896	-144.193	-484.154	-20.2197	-75.1633	294.688	-60.6094	370.508	321.036	358.123	161.742	-16.8895	292.922	17.7596
1793	455033	'Chardonnay' x V. cinerea B9	right	322.882	-10.818	-426.837	-672.702	170.329	-188.139	-244.791	-137.539	-427.193	-47.9942	-95.3172	308.294	-52.3489	337.806	293.004	365.765	179.292	-6.21441	280.981	51.5409
1794	455033	'Chardonnay' x V. cinerea B9	right	355.148	5.10613	-425.127	-561.462	167.267	-157.219	-291.465	-202.423	-481.406	-90.1452	-82.5017	265.13	-72.2035	300.748	320.285	379.392	180.175	9.85083	329.829	51.0224
1795	455034	'Chardonnay' x V. cinerea B9	right	317.688	25.2026	-508.284	-673.869	142.897	-168.847	-131.981	-148.799	-426.892	-59.3276	-23.0584	199.848	-57.6002	327.771	272.191	386.256	152.412	18.4005	262.628	93.3645
1796	455034	'Chardonnay' x V. cinerea B9	right	278.167	-20.0887	-366.146	-738.671	136.528	-174.094	-107.556	-114.536	-502.038	40.4864	-47.3268	258.25	-56.2029	371.913	297.159	331.609	130.595	-6.59756	236.822	51.7286
1797	455034	'Chardonnay' x V. cinerea B9	right	293.543	-30.9532	-332.517	-695.559	131.244	-195.277	-145.789	-145.917	-522.821	50.5766	-32.7643	210.722	-95.5815	406.971	323.63	337.447	123.129	17.3875	257.926	44.6025
1798	455034	'Chardonnay' x V. cinerea B9	right	309.402	0.516577	-377.452	-654.349	154.161	-156.499	-245.923	-174.62	-495.708	-38.4608	-88.6559	264.466	-56.4111	369.513	358.157	343.986	169.45	-9.17311	272.981	54.6202
1799	455034	'Chardonnay' x V. cinerea B9	right	307.9	-30.5962	-360.942	-653.273	155.4	-169.962	-261.12	-169.313	-505.006	-12.7555	-16.431	234.123	-86.3937	370.574	324.13	387.485	159.327	-3.71251	283.135	47.4297
1800	455034	'Chardonnay' x V. cinerea B9	right	289.398	-38.9106	-318.006	-653.443	141.406	-171.28	-288.148	-163.117	-502.221	-56.3415	-49.3969	295.719	-31.5133	400.929	343.217	370.784	153.038	-8.04207	262.227	23.7024
1801	455035	'Chardonnay' x V. cinerea B9	right	369.307	-19.3837	-430.8	-625.825	171.508	-158.725	-312.541	-156.404	-408.173	-53.9378	-97.1955	290.574	-79.7595	313.329	272.716	363.341	187.576	5.58249	327.363	41.4498
1802	455035	'Chardonnay' x V. cinerea B9	right	393.208	-25.6586	-406.558	-608.872	179.734	-184.788	-306.31	-125.109	-453.501	-33.3522	-97.9442	258.66	-90.3908	318.758	247.715	356.095	205.398	-6.74975	328.649	51.0165
1803	455035	'Chardonnay' x V. cinerea B9	right	363.226	-22.0518	-383.753	-600.08	168.094	-183.989	-334.278	-155.045	-464.931	-51.7827	-86.0684	267.205	-76.7888	321.124	304.381	376.547	204.891	-11.6425	305.227	59.7158
1804	455035	'Chardonnay' x V. cinerea B9	right	369.332	-28.6685	-418.666	-635.449	179.152	-170.566	-293.415	-164.126	-420.962	-32.1376	-99.2675	289.164	-76.3707	336.391	280.315	364.064	178.946	-10.8513	300.937	52.1783
1805	455035	'Chardonnay' x V. cinerea B9	right	362.915	-27.1831	-443.274	-627.025	160.619	-183.151	-292.437	-164.928	-400.59	-44.3774	-84.1623	262.745	-70.8679	318.795	276.165	403.631	189.582	-12.7801	302.051	74.2732
1806	455035	'Chardonnay' x V. cinerea B9	right	343.332	-11.8295	-422.422	-650.417	141.773	-197.647	-180.188	-138.902	-495.758	-33.6835	-77.6605	279.248	-56.8786	326.424	270.885	373.558	189.841	-11.809	287.075	65.0588
1807	455036	'Chardonnay' x V. cinerea B9	right	333.515	-21.9615	-400.091	-643.153	203.216	-159.04	-265.715	-163.808	-487.959	-45.7491	-42.0596	258.83	-78.9847	387.03	286.413	332.118	168.134	2.85759	283.531	52.8758
1808	455036	'Chardonnay' x V. cinerea B9	right	302.335	-10.6099	-437.628	-701.397	160.512	-177.049	-130.748	-124.409	-470.13	-17.5296	-61.8046	278.855	-61.5982	346.65	277.653	355.533	174.96	-12.0764	246.449	62.0322
1809	455036	'Chardonnay' x V. cinerea B9	right	359.974	10.1961	-440.653	-663.598	160.653	-174.22	-248.757	-135.569	-467.574	-16.9518	-40.8224	243.748	-66.2973	295.236	239.712	358.795	211.716	4.41521	292.05	77.9494
1810	455036	'Chardonnay' x V. cinerea B9	right	279.691	-6.50933	-400.501	-741.243	124.387	-187.183	-112.335	-110.194	-459.651	22.5058	-44.6326	254.57	-63.0313	375.316	285.624	351.897	148.857	-10.1137	241.591	50.9534
1811	455036	'Chardonnay' x V. cinerea B9	right	272.259	-4.22694	-408.775	-653.258	129.792	-181.051	-61.566	-110.969	-549.783	-83.5964	-3.72376	216.169	-70.8554	381.996	326.596	360.067	126.995	16.5891	239.061	58.28
1812	455036	'Chardonnay' x V. cinerea B9	right	271.032	-14.5342	-379.901	-710.424	143.18	-150.162	-90.0406	-96.4632	-526.007	0.046298	26.9057	181.114	-106.533	411.279	290.738	320.892	120.754	5.97612	249.872	52.2762
1813	455037	'Chardonnay' x V. cinerea B9	right	298.659	10.4094	-432.65	-697.924	108.181	-169.36	-158.546	-118.347	-483.413	-83.2465	26.0271	185.214	-24.378	378.529	291.362	371.692	115.352	25.6563	259.407	97.3757
1814	455037	'Chardonnay' x V. cinerea B9	right	259.386	-30.5645	-315.242	-756.946	131.689	-183.651	-143.171	-85.1938	-520.687	71.1604	34.6625	189.939	-44.2292	368.326	278.706	352.097	91.5774	10.2557	227.307	64.577
1815	455037	'Chardonnay' x V. cinerea B9	right	272.364	-19.8621	-359.552	-695.644	110.141	-173.535	-100.226	-99.6676	-533.878	-31.4771	31.805	197.258	-96.0551	386.591	350.509	364.95	90.7368	11.5317	234.157	59.8541
1816	455037	'Chardonnay' x V. cinerea B9	right	301.955	-19.6638	-408.985	-705.368	131.32	-180.365	-115.88	-100.913	-519.385	-44.2891	-35.7988	290.328	-13.7787	307.69	281.324	367.477	132.805	11.0188	246.423	74.0849
1817	455037	'Chardonnay' x V. cinerea B9	right	286.24	5.52112	-457.775	-708.3	119.863	-169.836	-77.1057	-107.923	-473.573	-59.5158	27.3942	183.568	-27.9178	370.551	259.64	376.422	108.106	23.0763	235.129	86.4357
1818	455037	'Chardonnay' x V. cinerea B9	right	294.475	-23.7566	-372.504	-708.293	145.464	-181.039	-149.426	-120.863	-525.595	15.6376	-7.76423	222.153	-63.4479	364.921	293.207	364.922	131.71	4.44198	253.881	61.8765
1819	455038	'Chardonnay' x V. cinerea B9	right	333.318	-16.9093	-346.267	-649.302	156.166	-180.751	-334.004	-161.322	-468.182	-29.9527	-71.3591	291.922	-43.9328	345.75	316.844	365.128	160.571	-5.45726	296.845	40.8952
1820	455038	'Chardonnay' x V. cinerea B9	right	337.28	-1.88438	-441.033	-666.43	160.966	-183.003	-285.974	-154.808	-403.194	-39.8434	-55.02	278.572	-71.2767	322.933	276.657	376.896	192.299	1.8834	289.295	65.6845
1821	455038	'Chardonnay' x V. cinerea B9	right	315.34	-36.3596	-354.385	-684.861	115.266	-206.575	-153.507	-123.135	-531.149	-24.0406	-56.0642	309.181	-39.171	377.044	279.055	328.774	171.235	-3.87864	253.38	63.8503
1822	455038	'Chardonnay' x V. cinerea B9	right	370.889	-30.3779	-439.419	-588.018	165.372	-202.459	-318.822	-160.333	-358.306	-47.5974	-133.497	256.654	-74.0125	320.06	271.988	422.833	188.702	-19.3982	327.107	48.6363
1823	455038	'Chardonnay' x V. cinerea B9	right	349.134	-15.4982	-393.008	-646.032	179.819	-173.021	-285.382	-143.762	-471.85	-15.5621	-107.942	278.613	-56.152	312.87	282.577	357.274	186.48	6.77053	316.324	38.3472
1824	455038	'Chardonnay' x V. cinerea B9	right	294.474	-28.9512	-292.305	-632.565	121.219	-177.927	-361.976	-176.522	-488.484	-70.8623	-49.0356	326.698	-17.6555	357.18	354.665	355.293	168.27	6.68218	270.828	40.9736
1825	455039	'Chardonnay' x V. cinerea B9	right	310.755	-13.7472	-327.198	-697.672	113.4	-173.272	-308.169	-156.92	-470.307	-24.8614	-36.6093	294.458	-28.2914	358.479	341.94	353.6	149.428	1.34338	255.052	58.5916
1826	455039	'Chardonnay' x V. cinerea B9	right	295.412	-30.7303	-332.984	-694.875	146.213	-175.301	-307.17	-147.926	-454.721	-23.1275	-51.934	329.586	-37.4868	364.765	316.275	356.055	166.942	-8.94596	259.453	30.4999
1827	455039	'Chardonnay' x V. cinerea B9	right	345.417	19.3448	-402.484	-677.547	161.865	-170.225	-323.308	-165.824	-436.502	-33.1612	-49.315	287.177	-19.3441	314.183	280.674	353.822	165.588	13.4833	277.41	58.7474
1828	455039	'Chardonnay' x V. cinerea B9	right	328.189	-24.6018	-369.209	-619.687	114.708	-212.759	-285.235	-151.567	-453.084	-112.444	-60.7026	315.198	-49.8202	366.492	346.021	397.479	140.304	-6.73594	288.829	48.6266
1829	455039	'Chardonnay' x V. cinerea B9	right	333.942	-5.28065	-454.12	-669.475	175.566	-159.377	-307.468	-165.735	-377.802	-48.4085	-57.6301	279.983	-46.5281	315.605	269.82	379.086	180.352	3.50565	283.868	70.0978
1830	455039	'Chardonnay' x V. cinerea B9	right	309.796	-32.9097	-370.15	-666.105	138.083	-172.616	-318.591	-169.325	-433.582	-80.9202	-48.0521	321.001	-20.6594	371.947	321.475	365.462	158.055	-0.257982	263.625	63.723
1831	455040	'Chardonnay' x V. cinerea B9	right	348.952	-45.5115	-380.183	-603.592	134.068	-210.109	-165.472	-151.622	-500.831	-54.7724	-97.3271	294.892	-108.918	388.355	325.632	371.314	156.229	-21.9613	287.85	33.007
1832	455040	'Chardonnay' x V. cinerea B9	right	329.818	-18.9514	-454.901	-650.683	158.949	-191.594	-134.618	-130.27	-460.428	-24.0582	-91.9665	258.763	-101.577	328.982	285.053	384.411	181.159	-7.7833	288.512	51.1837
1833	455040	'Chardonnay' x V. cinerea B9	right	305.125	-29.2938	-366.998	-716.627	125.306	-189.934	-162.386	-123.392	-481.762	8.3211	-46.6803	273.561	-69.3559	376.962	310.969	362.814	124.438	-1.97677	261.346	39.5647
1834	455040	'Chardonnay' x V. cinerea B9	right	334.425	-26.7175	-418.153	-670.178	143.828	-197.977	-174.114	-124.776	-473.799	-48.4327	-65.2019	281.379	-65.7607	359.224	289.812	376.399	148.68	-5.04026	280.283	56.1189
1835	455040	'Chardonnay' x V. cinerea B9	right	329.574	-25.8582	-426.931	-565.725	129.058	-183.749	-159.064	-166.81	-502.241	-114.713	-11.5794	202.498	-143.707	385.847	359.307	396.945	146.842	-3.72279	278.741	75.2878
1836	455040	'Chardonnay' x V. cinerea B9	right	317.514	-13.4988	-464.706	-669.942	141.155	-183.373	-192.657	-139.388	-412.299	-70.2018	-59.5811	269.548	-73.9998	344.476	298.886	400.504	165.789	2.27635	279.899	59.6006
1837	455042	'Chardonnay' x V. cinerea B9	right	283.71	-36.5303	-276.59	-754.484	151.18	-167.802	-272.822	-99.8746	-462.655	82.41	-74.1521	293.505	-60.5317	362.392	311.76	290.373	142.554	-2.25818	257.546	32.2694
1838	455042	'Chardonnay' x V. cinerea B9	right	300.423	-55.9551	-329.115	-692.148	169.053	-177.32	-270.235	-125.748	-479.061	-7.35804	-67.0074	309.071	-67.9289	374.967	324.047	343.753	150.683	-10.1308	269.142	40.869
1839	455042	'Chardonnay' x V. cinerea B9	right	300.531	-12.5742	-384.526	-709.956	153.468	-169.424	-276.173	-145.438	-444.763	-23.666	-42.4887	299.891	-34.4046	351.945	295.534	357.69	170.759	-4.82823	262.064	56.3599
1840	455042	'Chardonnay' x V. cinerea B9	right	318.225	-14.2403	-379.382	-693.824	172.008	-179.249	-291.969	-135.948	-444.011	-14.3961	-69.5296	288.525	-37.7235	327.523	316.906	380.755	159.953	-10.7464	255.523	51.6004
1841	455042	'Chardonnay' x V. cinerea B9	right	268.11	-16.7433	-318.761	-705.55	139.512	-149.207	-305.542	-155.19	-490.018	-45.2498	-48.8495	313.3	18.8589	365.215	337.606	318.982	152.41	7.36413	246.674	67.0787
[truncated: 8,939 more rows]
